# Supplementary material for: Physiology of Highly Radioresistant Escherichia coli After Experimental Evolution for 100 Cycles of Selection
Source: Front Microbiol. 2020 Sep 22;11:582590. doi: 10.3389/fmicb.2020.582590 (PMC7536353; doi:10.3389/fmicb.2020.582590)
Supplement: Supplementary file 10 [file Data_Sheet_2.xlsx]

## Sheet: All data
#CHROM	POS	Gene Name	Gene Accession	REF	ALT	QUAL	FILTER	INFO	FORMAT	IR9-100-1	IR9-100-2	IR9-100-3	IR9-100-4	IR9-100-5	IR10-100-1	IR10-100-2	IR10-100-3	IR10-100-4	IR10-100-5	IR11-100-1	IR11-100-2	IR11-100-3	IR11-100-4	IR11-100-5	IR12-100-1	IR12-100-2	IR12-100-3	IR12-100-4	IR12-100-5
NC_000913.3	1196245	icd	NP_415654.1	T	C	32.75	PASS	SN=0;STA=1196244;STO=1196245;TYP=SUB;R1P=803;R1M=766;R2P=808;R2M=698;AD=3075;DP=4794;MCOV=-41;PPC=1462;AF=0.6414;RAF=0.0122;LS=288806;MQS=165667;MQM=60;BQS=113305;BQM=39;EDS=64202;EDM=74;IDS=2936253;IDM=989;CED=601;HMP=1;SB=0.9998;EFF=SYNONYMOUS_CODING(LOW|SILENT|Tta/Cta|L375|416|icd|protein_coding|CODING|NP_415654.1|1|1)	GT:DP:AD:AF:RAF:SB:SC:PF	0.9785	1	0.9884	1	0.9891	0	0.0038	1	1	1	1	1	0.9905	1	0.9762	1	1	1	1	0.9896
NC_000913.3	1196232	icd	NP_415654.1	C	T	32.39	PASS	SN=0;STA=1196231;STO=1196232;TYP=SUB;R1P=1132;R1M=1014;R2P=1169;R2M=942;AD=4257;DP=5980;MCOV=-41;PPC=1958;AF=0.7119;RAF=0.0081;LS=398131;MQS=236441;MQM=60;BQS=158109;BQM=39;EDS=114771;EDM=75;IDS=4090772;IDM=985;CED=601;HMP=0;SB=0.9997;EFF=SYNONYMOUS_CODING(LOW|SILENT|acC/acT|T370|416|icd|protein_coding|CODING|NP_415654.1|1|1)	GT:DP:AD:AF:RAF:SB:SC:PF	1	1	1	1	0.9925	0	0.0038	1	1	1	1	1	0.9931	0.9917	0.9843	1	1	1	0.9925	0.9919
NC_000913.3	2056709	0	0	G	T	46.62	PASS	SN=0;STA=2056708;STO=2056709;TYP=SUB;R1P=961;R1M=698;R2P=1032;R2M=667;AD=3358;DP=14833;MCOV=-41;PPC=3351;AF=0.2264;RAF=0.0056;LS=320687;MQS=201466;MQM=60;BQS=122904;BQM=39;EDS=94886;EDM=75;IDS=3317201;IDM=992;CED=601;HMP=4;SB=0.9994;EFF=INTERGENIC(MODIFIER||||||||||1)	GT:DP:AD:AF:RAF:SB:SC:PF	0	0.0046	0	0.0024	0	0.9935	0.9957	1	0.993	1	0	0.0026	0.002	0	0.0021	0	0	0	0	0.0024
NC_000913.3	334666	yahC	NP_414851.1	G	T	57.21	PASS	SN=0;STA=334665;STO=334666;TYP=SUB;R1P=525;R1M=531;R2P=533;R2M=481;AD=2070;DP=8471;MCOV=-41;PPC=2062;AF=0.2444;RAF=0.0054;LS=202264;MQS=124185;MQM=60;BQS=74940;BQM=39;EDS=60060;EDM=75;IDS=2044113;IDM=992;CED=601;HMP=0;SB=0.9999;EFF=SYNONYMOUS_CODING(LOW|SILENT|ctC/ctA|L119|165|yahC|protein_coding|CODING|NP_414851.1|1|1)	GT:DP:AD:AF:RAF:SB:SC:PF	0.0046	0.0101	0	0.0047	0	1	0.9954	1	0.9958	1	0.0049	0	0	0.0048	0.0049	0	0	0	0	0
NC_000913.3	3087392	metK	NP_417417.1	T	G	50.85	PASS	SN=0;STA=3087391;STO=3087392;TYP=SUB;R1P=477;R1M=423;R2P=485;R2M=408;AD=1793;DP=8352;MCOV=-41;PPC=1782;AF=0.2147;RAF=0.0051;LS=178320;MQS=107580;MQM=60;BQS=64923;BQM=38;EDS=54046;EDM=75;IDS=1771545;IDM=992;CED=601;HMP=2;SB=0.9997;EFF=SYNONYMOUS_CODING(LOW|SILENT|ggT/ggG|G229|384|metK|protein_coding|CODING|NP_417417.1|1|1)	GT:DP:AD:AF:RAF:SB:SC:PF	0	0	0	0	0	0.9891	0.9948	1	0.9901	1	0	0	0	0	0.0057	0.0065	0	0.005	0	0
NC_000913.3	887267	ybjJ	NP_415366.1	C	A	57.76	PASS	SN=0;STA=887266;STO=887267;TYP=SUB;R1P=505;R1M=583;R2P=547;R2M=531;AD=2166;DP=9007;MCOV=-41;PPC=2152;AF=0.2405;RAF=0.0042;LS=211326;MQS=129960;MQM=60;BQS=80025;BQM=39;EDS=62654;EDM=75;IDS=2140256;IDM=992;CED=601;HMP=0;SB=0.9999;EFF=NON_SYNONYMOUS_CODING(MODERATE|MISSENSE|Ggc/Tgc|G25C|402|ybjJ|protein_coding|CODING|NP_415366.1|1|1)	GT:DP:AD:AF:RAF:SB:SC:PF	0.0083	0.004	0	0.0042	0.0085	1	1	1	1	1	0	0.0041	0.0049	0	0	0	0	0	0	0
NC_000913.3	1189691	phoQ	NP_415647.1	G	A	48.68	PASS	SN=0;STA=1189690;STO=1189691;TYP=SUB;R1P=553;R1M=546;R2P=583;R2M=539;AD=2221;DP=9345;MCOV=-41;PPC=2212;AF=0.2377;RAF=0.0042;LS=217296;MQS=133200;MQM=60;BQS=82299;BQM=39;EDS=67492;EDM=75;IDS=2193401;IDM=992;CED=601;HMP=3;SB=0.9999;EFF=NON_SYNONYMOUS_CODING(MODERATE|MISSENSE|tCg/tTg|S29L|486|phoQ|protein_coding|CODING|NP_415647.1|1|1)	GT:DP:AD:AF:RAF:SB:SC:PF	0	0	0	0	0	0.9957	0.9919	1	0.9959	1	0	0	0	0	0	0	0	0	0	0.004
NC_000913.3	1196247	icd	NP_415654.1	A	G	32.91	PASS	SN=0;STA=1196246;STO=1196247;TYP=SUB;R1P=715;R1M=726;R2P=725;R2M=653;AD=2819;DP=4514;MCOV=-41;PPC=1378;AF=0.6245;RAF=0.0041;LS=265295;MQS=150242;MQM=60;BQS=103854;BQM=39;EDS=57174;EDM=75;IDS=2689030;IDM=971;CED=601;HMP=0;SB=0.9999;EFF=SYNONYMOUS_CODING(LOW|SILENT|ttA/ttG|L375|416|icd|protein_coding|CODING|NP_415654.1|1|1)	GT:DP:AD:AF:RAF:SB:SC:PF	1	1	1	1	0.977	0	0.0039	1	0.9886	1	1	1	1	1	0.987	1	1	0.9881	1	1
NC_000913.3	1416320	recE	NP_415866.1	G	A	58.2	PASS	SN=0;STA=1416319;STO=1416320;TYP=SUB;R1P=530;R1M=556;R2P=555;R2M=603;AD=2244;DP=9091;MCOV=-41;PPC=2234;AF=0.2468;RAF=0.0040;LS=220946;MQS=134640;MQM=60;BQS=82556;BQM=39;EDS=64765;EDM=75;IDS=2208373;IDM=992;CED=601;HMP=0;SB=0.9999;EFF=NON_SYNONYMOUS_CODING(MODERATE|MISSENSE|gCc/gTc|A356V|866|recE|protein_coding|CODING|NP_415866.1|1|1)	GT:DP:AD:AF:RAF:SB:SC:PF	0	0	0	0	0	0.9911	0.9956	1	0.9956	1	0	0	0.0043	0	0	0.0058	0	0	0	0
NC_000913.3	1146967	yceD	NP_415606.1	C	A	57.88	PASS	SN=0;STA=1146966;STO=1146967;TYP=SUB;R1P=555;R1M=565;R2P=481;R2M=547;AD=2148;DP=8753;MCOV=-41;PPC=2142;AF=0.2454;RAF=0.0040;LS=209275;MQS=128880;MQM=60;BQS=79209;BQM=39;EDS=60858;EDM=75;IDS=2122317;IDM=992;CED=601;HMP=0;SB=0.9999;EFF=SYNONYMOUS_CODING(LOW|SILENT|ctC/ctA|L58|173|yceD|protein_coding|CODING|NP_415606.1|1|1)	GT:DP:AD:AF:RAF:SB:SC:PF	0	0	0.0094	0	0	1	0.9917	1	1	1	0.0047	0	0	0	0	0	0	0	0.0043	0
NC_000913.3	1196220	icd	NP_415654.1	C	T	32.69	PASS	SN=0;STA=1196219;STO=1196220;TYP=SUB;R1P=1441;R1M=1215;R2P=1476;R2M=1122;AD=5254;DP=7017;MCOV=-41;PPC=2341;AF=0.7488;RAF=0.0038;LS=490313;MQS=296286;MQM=60;BQS=190349;BQM=39;EDS=165702;EDM=75;IDS=5075533;IDM=992;CED=601;HMP=0;SB=0.9996;EFF=SYNONYMOUS_CODING(LOW|SILENT|caC/caT|H366|416|icd|protein_coding|CODING|NP_415654.1|1|1)	GT:DP:AD:AF:RAF:SB:SC:PF	0.994	1	1	1	0.9885	0	0.0074	1	1	1	0.9938	0.9941	1	1	0.9939	1	1	1	0.9944	1
NC_000913.3	3657345	hdeD	NP_417968.1	T	A	58.46	PASS	SN=0;STA=3657344;STO=3657345;TYP=SUB;R1P=723;R1M=706;R2P=700;R2M=571;AD=2700;DP=11908;MCOV=-41;PPC=2692;AF=0.2267;RAF=0.0033;LS=261002;MQS=161952;MQM=60;BQS=99800;BQM=39;EDS=77513;EDM=75;IDS=2667547;IDM=992;CED=601;HMP=0;SB=0.9998;EFF=SYNONYMOUS_CODING(LOW|SILENT|gtT/gtA|V117|190|hdeD|protein_coding|CODING|NP_417968.1|1|1)	GT:DP:AD:AF:RAF:SB:SC:PF	0	0	0	0.0033	0	1	0.9885	1	0.9971	1	0.0027	0	0	0	0	0	0	0	0	0
NC_000913.3	1196277	icd	NP_415654.1	C	T	33.56	PASS	SN=0;STA=1196276;STO=1196277;TYP=SUB;R1P=12;R1M=92;R2P=18;R2M=87;AD=209;DP=1882;MCOV=-41;PPC=179;AF=0.1111;RAF=0.0000;LS=23169;MQS=8065;MQM=60;BQS=7636;BQM=39;EDS=3085;EDM=47;IDS=195566;IDM=964;CED=601;HMP=0;SB=0.1835;EFF=SYNONYMOUS_CODING(LOW|SILENT|aaC/aaT|N385|416|icd|protein_coding|CODING|NP_415654.1|1|1)	GT:DP:AD:AF:RAF:SB:SC:PF	1	1	1	1	1	0	0	1	1	1	1	1	1	1	1	1	1	1	1	1
NC_000913.3	1196280	icd	NP_415654.1	G	C	31.45	PASS	SN=0;STA=1196279;STO=1196280;TYP=SUB;R1P=12;R1M=80;R2P=18;R2M=72;AD=182;DP=1888;MCOV=-41;PPC=152;AF=0.0964;RAF=0.0000;LS=20612;MQS=6945;MQM=60;BQS=6761;BQM=39;EDS=2403;EDM=44;IDS=170031;IDM=957;CED=601;HMP=1;SB=0.1895;EFF=SYNONYMOUS_CODING(LOW|SILENT|gcG/gcC|A386|416|icd|protein_coding|CODING|NP_415654.1|1|1)	GT:DP:AD:AF:RAF:SB:SC:PF	1	1	1	1	1	0	0	1	1	1	1	1	1	1	1	1	1	1	1	1
NC_000913.3	1196283	icd	NP_415654.1	A	G	28.17	PASS	SN=0;STA=1196282;STO=1196283;TYP=SUB;R1P=10;R1M=68;R2P=17;R2M=51;AD=146;DP=1829;MCOV=-41;PPC=119;AF=0.0798;RAF=0.0000;LS=17036;MQS=5419;MQM=60;BQS=5334;BQM=39;EDS=1713;EDM=41;IDS=136298;IDM=950;CED=601;HMP=0;SB=0.1955;EFF=SYNONYMOUS_CODING(LOW|SILENT|aaA/aaG|K387|416|icd|protein_coding|CODING|NP_415654.1|1|1)	GT:DP:AD:AF:RAF:SB:SC:PF	1	1	1	1	1	0	0	1	1	1	1	1	1	1	1	1	1	1	1	0
NC_000913.3	399538	0	0	A	C	46.51	PASS	SN=0;STA=399537;STO=399538;TYP=SUB;R1P=616;R1M=606;R2P=646;R2M=553;AD=2421;DP=10630;MCOV=-41;PPC=2409;AF=0.2278;RAF=0.0000;LS=235432;MQS=145260;MQM=60;BQS=88537;BQM=39;EDS=70452;EDM=75;IDS=2392042;IDM=992;CED=601;HMP=4;SB=0.9998;EFF=INTERGENIC(MODIFIER||||||||||1)	GT:DP:AD:AF:RAF:SB:SC:PF	0.003	0	0	0	0	0.9849	0.9891	1	0.9925	1	0	0	0	0	0	0.0167	0	0	0	0
NC_000913.3	4172416	murB	NP_418403.1	G	A	46.77	PASS	SN=0;STA=4172415;STO=4172416;TYP=SUB;R1P=732;R1M=707;R2P=651;R2M=686;AD=2776;DP=11514;MCOV=-41;PPC=2765;AF=0.2411;RAF=0.0000;LS=274502;MQS=166560;MQM=60;BQS=101543;BQM=39;EDS=78622;EDM=75;IDS=2743458;IDM=992;CED=601;HMP=4;SB=1.0000;EFF=SYNONYMOUS_CODING(LOW|SILENT|caG/caA|Q120|342|murB|protein_coding|CODING|NP_418403.1|1|1)	GT:DP:AD:AF:RAF:SB:SC:PF	0.0034	0	0	0	0	0.994	0.9966	1	1	1	0	0	0	0	0	0.0152	0.0035	0	0	0
NC_000913.3	3550677	malP	YP_026218.1	A	G	50.8	PASS	SN=0;STA=3550676;STO=3550677;TYP=SUB;R1P=534;R1M=551;R2P=487;R2M=536;AD=2108;DP=9244;MCOV=-41;PPC=2095;AF=0.2280;RAF=0.0000;LS=206901;MQS=126479;MQM=60;BQS=76825;BQM=38;EDS=64526;EDM=75;IDS=2082830;IDM=992;CED=601;HMP=2;SB=0.9999;EFF=SYNONYMOUS_CODING(LOW|SILENT|gaT/gaC|D599|797|malP|protein_coding|CODING|YP_026218.1|1|1)	GT:DP:AD:AF:RAF:SB:SC:PF	0	0	0	0	0	1	0.992	1	0.996	1	0	0	0	0	0	0.0134	0	0	0	0
NC_000913.3	1284841	narH	NP_415743.1	G	A	58.04	PASS	SN=0;STA=1284840;STO=1284841;TYP=SUB;R1P=518;R1M=495;R2P=505;R2M=205;AD=1723;DP=7070;MCOV=-41;PPC=1714;AF=0.2437;RAF=0.0000;LS=171946;MQS=103380;MQM=60;BQS=64033;BQM=39;EDS=50725;EDM=75;IDS=1693761;IDM=992;CED=601;HMP=0;SB=0.9994;EFF=NON_SYNONYMOUS_CODING(MODERATE|MISSENSE|cGt/cAt|R413H|512|narH|protein_coding|CODING|NP_415743.1|1|1)	GT:DP:AD:AF:RAF:SB:SC:PF	0	0	0	0	0	1	1	1	1	1	0	0	0	0	0	0.0064	0	0	0	0
NC_000913.3	4411384	yjfK	NP_418604.1	G	T	58.62	PASS	SN=0;STA=4411383;STO=4411384;TYP=SUB;R1P=650;R1M=572;R2P=616;R2M=566;AD=2404;DP=9877;MCOV=-41;PPC=2385;AF=0.2434;RAF=0.0000;LS=236535;MQS=144240;MQM=60;BQS=89078;BQM=39;EDS=71871;EDM=75;IDS=2373053;IDM=992;CED=601;HMP=1;SB=0.9998;EFF=NON_SYNONYMOUS_CODING(MODERATE|MISSENSE|aGt/aTt|S28I|219|yjfK|protein_coding|CODING|NP_418604.1|1|1)	GT:DP:AD:AF:RAF:SB:SC:PF	0	0.0038	0	0.0039	0.0083	0.996	0.9922	1	0.9928	1	0.0044	0	0	0	0	0.0061	0	0	0	0.004
NC_000913.3	2053190	yeeL	b4497	C	T	58.49	PASS	SN=0;STA=2053189;STO=2053190;TYP=SUB;R1P=769;R1M=882;R2P=747;R2M=899;AD=3297;DP=14740;MCOV=-41;PPC=3291;AF=0.2237;RAF=0.0000;LS=316508;MQS=197760;MQM=60;BQS=121516;BQM=39;EDS=96836;EDM=75;IDS=3258098;IDM=992;CED=601;HMP=0;SB=0.9997;EFF=NON_SYNONYMOUS_CODING(MODERATE|MISSENSE|Gtt/Att|V47I|350|yeeL|protein_coding|CODING|b4497|1|1)	GT:DP:AD:AF:RAF:SB:SC:PF	0	0	0.0022	0.0021	0	1	0.9879	1	0.9973	1	0.0023	0	0	0	0	0.0056	0	0.0023	0	0
NC_000913.3	2034297	yedS	b4496	G	T	58.37	PASS	SN=0;STA=2034296;STO=2034297;TYP=SUB;R1P=693;R1M=845;R2P=655;R2M=763;AD=2956;DP=12887;MCOV=-41;PPC=2949;AF=0.2294;RAF=0.0000;LS=284950;MQS=177349;MQM=60;BQS=108855;BQM=39;EDS=84809;EDM=75;IDS=2920694;IDM=992;CED=601;HMP=0;SB=0.9997;EFF=NON_SYNONYMOUS_CODING(MODERATE|MISSENSE|Gca/Tca|A83S|396|yedS|protein_coding|CODING|b4496|1|1|WARNING_TRANSCRIPT_INCOMPLETE)	GT:DP:AD:AF:RAF:SB:SC:PF	0	0	0	0	0.0053	0.9975	0.9946	1	1	1	0	0	0	0	0	0.0053	0	0.0029	0	0
NC_000913.3	93735	murE	NP_414627.1	A	G	57.22	PASS	SN=0;STA=93734;STO=93735;TYP=SUB;R1P=417;R1M=469;R2P=407;R2M=438;AD=1731;DP=7261;MCOV=-41;PPC=1721;AF=0.2384;RAF=0.0000;LS=172758;MQS=103860;MQM=60;BQS=63082;BQM=39;EDS=50393;EDM=75;IDS=1709494;IDM=992;CED=601;HMP=0;SB=0.9998;EFF=SYNONYMOUS_CODING(LOW|SILENT|gtA/gtG|V190|495|murE|protein_coding|CODING|NP_414627.1|1|1|WARNING_TRANSCRIPT_NO_START_CODON)	GT:DP:AD:AF:RAF:SB:SC:PF	0	0	0	0	0	1	0.9882	1	1	1	0	0	0	0	0	0	0	0	0	0
NC_000913.3	298216	paoD	NP_414817.1	C	T	58.21	PASS	SN=0;STA=298215;STO=298216;TYP=SUB;R1P=469;R1M=402;R2P=458;R2M=458;AD=1787;DP=7139;MCOV=-41;PPC=1775;AF=0.2503;RAF=0.0000;LS=177541;MQS=107168;MQM=60;BQS=65739;BQM=39;EDS=51824;EDM=75;IDS=1765874;IDM=992;CED=601;HMP=1;SB=0.9999;EFF=NON_SYNONYMOUS_CODING(MODERATE|MISSENSE|Gag/Aag|E171K|318|paoD|protein_coding|CODING|NP_414817.1|1|1)	GT:DP:AD:AF:RAF:SB:SC:PF	0	0	0	0	0	1	0.9947	1	1	1	0.0144	0	0	0	0.0067	0	0	0	0	0.0061
NC_000913.3	313035	0	0	T	A	58.15	PASS	SN=0;STA=313034;STO=313035;TYP=SUB;R1P=780;R1M=783;R2P=735;R2M=764;AD=3062;DP=13661;MCOV=-41;PPC=3050;AF=0.2241;RAF=0.0000;LS=293568;MQS=183717;MQM=60;BQS=113536;BQM=39;EDS=88664;EDM=75;IDS=3025260;IDM=992;CED=601;HMP=1;SB=1.0000;EFF=INTERGENIC(MODIFIER||||||||||1)	GT:DP:AD:AF:RAF:SB:SC:PF	0	0	0	0.0024	0.0023	0.9977	0.995	1	0.9977	1	0	0	0	0	0	0	0	0	0	0
NC_000913.3	378407	0	0	C	A	58.1	PASS	SN=0;STA=378406;STO=378407;TYP=SUB;R1P=566;R1M=517;R2P=643;R2M=511;AD=2237;DP=9252;MCOV=-41;PPC=2228;AF=0.2418;RAF=0.0000;LS=219505;MQS=134220;MQM=60;BQS=81305;BQM=39;EDS=65426;EDM=75;IDS=2209489;IDM=992;CED=601;HMP=0;SB=0.9997;EFF=INTERGENIC(MODIFIER||||||||||1)	GT:DP:AD:AF:RAF:SB:SC:PF	0.0043	0	0	0	0.0127	0.9957	0.9945	1	1	1	0	0	0	0.0044	0	0	0.0049	0.0043	0.0047	0
NC_000913.3	404349	yaiC	NP_414919.1	C	A	57.84	PASS	SN=0;STA=404348;STO=404349;TYP=SUB;R1P=461;R1M=500;R2P=476;R2M=543;AD=1980;DP=8101;MCOV=-41;PPC=1964;AF=0.2444;RAF=0.0000;LS=194856;MQS=118797;MQM=60;BQS=71911;BQM=39;EDS=58213;EDM=75;IDS=1956062;IDM=992;CED=601;HMP=1;SB=0.9998;EFF=NON_SYNONYMOUS_CODING(MODERATE|MISSENSE|aCg/aAg|T216K|371|yaiC|protein_coding|CODING|NP_414919.1|1|1)	GT:DP:AD:AF:RAF:SB:SC:PF	0	0.0054	0	0	0	0.9947	0.995	1	1	1	0	0.0052	0	0	0.005	0	0	0	0	0.0054
NC_000913.3	415318	sbcC	NP_414931.1	G	T	57.92	PASS	SN=0;STA=415317;STO=415318;TYP=SUB;R1P=444;R1M=421;R2P=495;R2M=463;AD=1823;DP=8140;MCOV=-41;PPC=1810;AF=0.2240;RAF=0.0000;LS=179920;MQS=109380;MQM=60;BQS=66095;BQM=39;EDS=54676;EDM=75;IDS=1800965;IDM=992;CED=601;HMP=0;SB=0.9999;EFF=NON_SYNONYMOUS_CODING(MODERATE|MISSENSE|Cgc/Agc|R146S|1048|sbcC|protein_coding|CODING|NP_414931.1|1|1)	GT:DP:AD:AF:RAF:SB:SC:PF	0	0.0063	0	0	0	1	0.9802	1	0.9957	1	0	0	0	0	0	0	0	0	0.006	0.0053
NC_000913.3	415598	sbcC	NP_414931.1	C	A	58.48	PASS	SN=0;STA=415597;STO=415598;TYP=SUB;R1P=596;R1M=464;R2P=552;R2M=479;AD=2091;DP=8265;MCOV=-41;PPC=2081;AF=0.2530;RAF=0.0000;LS=207819;MQS=125460;MQM=60;BQS=76616;BQM=39;EDS=61746;EDM=75;IDS=2065813;IDM=992;CED=601;HMP=1;SB=0.9996;EFF=SYNONYMOUS_CODING(LOW|SILENT|ctG/ctT|L52|1048|sbcC|protein_coding|CODING|NP_414931.1|1|1)	GT:DP:AD:AF:RAF:SB:SC:PF	0	0	0.006	0	0	1	0.9949	1	0.9908	1	0.0052	0	0.0048	0	0	0	0	0	0.0053	0
NC_000913.3	559028	sfmC	NP_415064.1	G	C	50.78	PASS	SN=0;STA=559027;STO=559028;TYP=SUB;R1P=831;R1M=637;R2P=807;R2M=623;AD=2898;DP=12949;MCOV=-41;PPC=2883;AF=0.2238;RAF=0.0000;LS=279927;MQS=173859;MQM=60;BQS=105132;BQM=38;EDS=79526;EDM=75;IDS=2863272;IDM=992;CED=601;HMP=2;SB=0.9995;EFF=NON_SYNONYMOUS_CODING(MODERATE|MISSENSE|Gcc/Ccc|A19P|230|sfmC|protein_coding|CODING|NP_415064.1|1|1)	GT:DP:AD:AF:RAF:SB:SC:PF	0	0	0	0	0	0.9922	0.9974	1	1	1	0	0	0	0.0029	0	0	0	0	0	0
NC_000913.3	759356	sucA	NP_415254.1	C	T	57.95	PASS	SN=0;STA=759355;STO=759356;TYP=SUB;R1P=460;R1M=556;R2P=433;R2M=513;AD=1962;DP=8234;MCOV=-41;PPC=1950;AF=0.2383;RAF=0.0000;LS=193729;MQS=117678;MQM=60;BQS=71225;BQM=39;EDS=58898;EDM=75;IDS=1938421;IDM=992;CED=601;HMP=1;SB=0.9997;EFF=SYNONYMOUS_CODING(LOW|SILENT|ctC/ctT|L217|933|sucA|protein_coding|CODING|NP_415254.1|1|1)	GT:DP:AD:AF:RAF:SB:SC:PF	0	0	0	0	0	0.9901	0.9942	1	0.9947	1	0	0	0	0	0	0	0	0	0.0056	0
NC_000913.3	774245	cydX	YP_588444.1	G	T	58.41	PASS	SN=0;STA=774244;STO=774245;TYP=SUB;R1P=632;R1M=502;R2P=646;R2M=566;AD=2346;DP=9759;MCOV=-41;PPC=2333;AF=0.2404;RAF=0.0000;LS=229469;MQS=140760;MQM=60;BQS=87207;BQM=39;EDS=70249;EDM=75;IDS=2317940;IDM=992;CED=601;HMP=0;SB=0.9997;EFF=NON_SYNONYMOUS_CODING(MODERATE|MISSENSE|gGg/gTg|G17V|37|cydX|protein_coding|CODING|YP_588444.1|1|1)	GT:DP:AD:AF:RAF:SB:SC:PF	0	0.0041	0	0	0.0113	1	0.996	1	1	1	0	0	0	0	0.0043	0	0.0039	0.0043	0.0044	0
NC_000913.3	1141919	rne	NP_415602.1	C	A	58.07	PASS	SN=0;STA=1141918;STO=1141919;TYP=SUB;R1P=410;R1M=425;R2P=446;R2M=422;AD=1703;DP=6892;MCOV=-41;PPC=1686;AF=0.2471;RAF=0.0000;LS=170812;MQS=102169;MQM=60;BQS=62149;BQM=39;EDS=51502;EDM=75;IDS=1682709;IDM=992;CED=601;HMP=1;SB=1.0000;EFF=NON_SYNONYMOUS_CODING(MODERATE|MISSENSE|Gac/Tac|D817Y|1061|rne|protein_coding|CODING|NP_415602.1|1|1)	GT:DP:AD:AF:RAF:SB:SC:PF	0.0058	0	0	0	0	1	1	1	1	1	0	0.0063	0	0	0	0	0	0	0.0058	0
NC_000913.3	1160477	fhuE	NP_415620.1	T	A	58.21	PASS	SN=0;STA=1160476;STO=1160477;TYP=SUB;R1P=534;R1M=550;R2P=523;R2M=548;AD=2155;DP=9074;MCOV=-41;PPC=2141;AF=0.2375;RAF=0.0000;LS=211238;MQS=129300;MQM=60;BQS=78671;BQM=39;EDS=62651;EDM=75;IDS=2128592;IDM=992;CED=601;HMP=1;SB=0.9999;EFF=NON_SYNONYMOUS_CODING(MODERATE|MISSENSE|Aat/Tat|N359Y|729|fhuE|protein_coding|CODING|NP_415620.1|1|1)	GT:DP:AD:AF:RAF:SB:SC:PF	0	0	0	0	0	1	0.9956	1	1	1	0	0	0	0	0	0	0.0048	0	0	0
NC_000913.3	1162586	ycfL	NP_415622.1	C	A	57.43	PASS	SN=0;STA=1162585;STO=1162586;TYP=SUB;R1P=372;R1M=632;R2P=397;R2M=598;AD=1999;DP=8389;MCOV=-41;PPC=1991;AF=0.2383;RAF=0.0000;LS=197136;MQS=119917;MQM=60;BQS=72826;BQM=39;EDS=59399;EDM=75;IDS=1955516;IDM=992;CED=601;HMP=0;SB=0.9993;EFF=NON_SYNONYMOUS_CODING(MODERATE|MISSENSE|Ctg/Atg|L114M|125|ycfL|protein_coding|CODING|NP_415622.1|1|1)	GT:DP:AD:AF:RAF:SB:SC:PF	0.005	0	0	0	0.0055	0.9846	0.984	1	0.9947	1	0	0	0	0	0	0	0	0.0053	0	0
NC_000913.3	1178390	lolE	NP_415636.1	T	C	57.56	PASS	SN=0;STA=1178389;STO=1178390;TYP=SUB;R1P=468;R1M=583;R2P=511;R2M=561;AD=2123;DP=9298;MCOV=-41;PPC=2104;AF=0.2283;RAF=0.0000;LS=206977;MQS=127380;MQM=60;BQS=77097;BQM=39;EDS=62862;EDM=75;IDS=2097016;IDM=992;CED=601;HMP=1;SB=0.9997;EFF=SYNONYMOUS_CODING(LOW|SILENT|ggT/ggC|G357|414|lolE|protein_coding|CODING|NP_415636.1|1|1)	GT:DP:AD:AF:RAF:SB:SC:PF	0	0	0.0037	0	0	0.9958	0.9961	1	1	1	0	0	0	0	0	0	0	0	0	0.0038
NC_000913.3	1379002	ycjT	NP_415832.1	C	T	58.29	PASS	SN=0;STA=1379001;STO=1379002;TYP=SUB;R1P=440;R1M=418;R2P=477;R2M=488;AD=1823;DP=7646;MCOV=-41;PPC=1817;AF=0.2384;RAF=0.0000;LS=182484;MQS=109380;MQM=60;BQS=66509;BQM=39;EDS=55153;EDM=75;IDS=1801633;IDM=992;CED=601;HMP=1;SB=1.0000;EFF=SYNONYMOUS_CODING(LOW|SILENT|ggC/ggT|G373|755|ycjT|protein_coding|CODING|NP_415832.1|1|1)	GT:DP:AD:AF:RAF:SB:SC:PF	0	0	0	0	0	0.9944	0.9819	1	1	1	0	0.0055	0	0	0	0	0	0	0	0
NC_000913.3	1402194	abgB	NP_415853.1	G	T	58.16	PASS	SN=0;STA=1402193;STO=1402194;TYP=SUB;R1P=474;R1M=639;R2P=484;R2M=556;AD=2153;DP=8541;MCOV=-41;PPC=2137;AF=0.2521;RAF=0.0000;LS=213050;MQS=129165;MQM=60;BQS=78586;BQM=39;EDS=62123;EDM=75;IDS=2127380;IDM=992;CED=601;HMP=0;SB=0.9996;EFF=SYNONYMOUS_CODING(LOW|SILENT|ggC/ggA|G354|481|abgB|protein_coding|CODING|NP_415853.1|1|1)	GT:DP:AD:AF:RAF:SB:SC:PF	0	0	0.0048	0	0	0.9951	0.9955	1	0.9955	1	0	0.0103	0	0	0	0	0	0.0041	0	0
NC_000913.3	1416378	recE	NP_415866.1	C	A	58.26	PASS	SN=0;STA=1416377;STO=1416378;TYP=SUB;R1P=488;R1M=567;R2P=585;R2M=583;AD=2223;DP=8680;MCOV=-41;PPC=2217;AF=0.2561;RAF=0.0000;LS=219357;MQS=133380;MQM=60;BQS=80126;BQM=39;EDS=64519;EDM=75;IDS=2188263;IDM=992;CED=601;HMP=1;SB=0.9999;EFF=NON_SYNONYMOUS_CODING(MODERATE|MISSENSE|Gtc/Ttc|V337F|866|recE|protein_coding|CODING|NP_415866.1|1|1)	GT:DP:AD:AF:RAF:SB:SC:PF	0	0	0	0	0	0.9903	0.9869	1	0.9955	1	0	0	0.0047	0	0	0	0	0.0052	0	0
NC_000913.3	1801595	thrS	NP_416234.1	C	T	50.71	PASS	SN=0;STA=1801594;STO=1801595;TYP=SUB;R1P=569;R1M=548;R2P=535;R2M=525;AD=2177;DP=9064;MCOV=-41;PPC=2171;AF=0.2402;RAF=0.0000;LS=212346;MQS=130620;MQM=60;BQS=80822;BQM=39;EDS=61364;EDM=75;IDS=2151615;IDM=992;CED=601;HMP=2;SB=0.9999;EFF=NON_SYNONYMOUS_CODING(MODERATE|MISSENSE|Gaa/Aaa|E326K|642|thrS|protein_coding|CODING|NP_416234.1|1|1)	GT:DP:AD:AF:RAF:SB:SC:PF	0	0	0	0	0.0044	0.9958	0.9954	1	0.9949	1	0	0	0	0	0	0	0	0.0046	0	0.0047
NC_000913.3	1952329	yecN	NP_416383.4	G	T	50.89	PASS	SN=0;STA=1952328;STO=1952329;TYP=SUB;R1P=558;R1M=574;R2P=411;R2M=556;AD=2099;DP=8830;MCOV=-41;PPC=2091;AF=0.2377;RAF=0.0000;LS=207184;MQS=125938;MQM=60;BQS=77570;BQM=39;EDS=61184;EDM=75;IDS=2071567;IDM=992;CED=601;HMP=2;SB=0.9997;EFF=NON_SYNONYMOUS_CODING(MODERATE|MISSENSE|Gtt/Ttt|V22F|131|yecN|protein_coding|CODING|NP_416383.4|1|1)	GT:DP:AD:AF:RAF:SB:SC:PF	0	0	0	0	0	0.9955	1	1	1	1	0	0	0	0	0	0	0	0	0	0
NC_000913.3	1963643	flhA	NP_416393.1	G	T	58.02	PASS	SN=0;STA=1963642;STO=1963643;TYP=SUB;R1P=453;R1M=457;R2P=443;R2M=421;AD=1774;DP=7182;MCOV=-41;PPC=1761;AF=0.2470;RAF=0.0000;LS=176468;MQS=106440;MQM=60;BQS=64841;BQM=39;EDS=51045;EDM=75;IDS=1750308;IDM=992;CED=601;HMP=0;SB=1.0000;EFF=NON_SYNONYMOUS_CODING(MODERATE|MISSENSE|Cta/Ata|L470I|692|flhA|protein_coding|CODING|NP_416393.1|1|1)	GT:DP:AD:AF:RAF:SB:SC:PF	0	0	0	0	0	0.9944	1	1	1	1	0	0	0	0	0	0	0	0	0	0
NC_000913.3	2389987	0	0	C	T	57.25	PASS	SN=0;STA=2389986;STO=2389987;TYP=SUB;R1P=383;R1M=812;R2P=455;R2M=784;AD=2434;DP=10623;MCOV=-41;PPC=2418;AF=0.2291;RAF=0.0000;LS=235346;MQS=145992;MQM=60;BQS=88545;BQM=39;EDS=70386;EDM=75;IDS=2404443;IDM=992;CED=601;HMP=0;SB=0.9204;EFF=INTERGENIC(MODIFIER||||||||||1)	GT:DP:AD:AF:RAF:SB:SC:PF	0.0036	0	0	0	0	0.9933	0.985	1	0.9963	1	0	0	0	0	0	0	0.0038	0	0	0.0038
NC_000913.3	2544153	ucpA	NP_416921.4	T	G	57.85	PASS	SN=0;STA=2544152;STO=2544153;TYP=SUB;R1P=509;R1M=475;R2P=551;R2M=504;AD=2039;DP=8591;MCOV=-41;PPC=2030;AF=0.2373;RAF=0.0000;LS=201805;MQS=122340;MQM=60;BQS=75259;BQM=39;EDS=59415;EDM=75;IDS=2015024;IDM=992;CED=601;HMP=0;SB=0.9998;EFF=NON_SYNONYMOUS_CODING(MODERATE|MISSENSE|ttA/ttC|L157F|263|ucpA|protein_coding|CODING|NP_416921.4|1|1)	GT:DP:AD:AF:RAF:SB:SC:PF	0	0	0	0	0	0.9766	0.9944	1	0.9947	1	0	0	0	0	0	0	0	0.0046	0	0.0052
NC_000913.3	2738618	pheA	NP_417090.1	G	T	57.9	PASS	SN=0;STA=2738617;STO=2738618;TYP=SUB;R1P=560;R1M=495;R2P=600;R2M=539;AD=2194;DP=9190;MCOV=-41;PPC=2188;AF=0.2387;RAF=0.0000;LS=213789;MQS=131579;MQM=60;BQS=81420;BQM=39;EDS=63326;EDM=75;IDS=2167896;IDM=992;CED=601;HMP=1;SB=0.9998;EFF=NON_SYNONYMOUS_CODING(MODERATE|MISSENSE|Gat/Tat|D292Y|386|pheA|protein_coding|CODING|NP_417090.1|1|1)	GT:DP:AD:AF:RAF:SB:SC:PF	0.0042	0	0.0042	0	0	1	0.9875	1	1	1	0	0	0	0	0	0	0	0	0	0
NC_000913.3	2805041	proV	NP_417163.1	G	A	58.14	PASS	SN=0;STA=2805040;STO=2805041;TYP=SUB;R1P=450;R1M=732;R2P=473;R2M=711;AD=2366;DP=10133;MCOV=-41;PPC=2348;AF=0.2335;RAF=0.0000;LS=230123;MQS=141960;MQM=60;BQS=87164;BQM=39;EDS=70831;EDM=75;IDS=2337538;IDM=992;CED=601;HMP=0;SB=0.9993;EFF=NON_SYNONYMOUS_CODING(MODERATE|MISSENSE|cGc/cAc|R76H|400|proV|protein_coding|CODING|NP_417163.1|1|1)	GT:DP:AD:AF:RAF:SB:SC:PF	0	0	0	0	0	0.9858	0.9868	1	1	1	0	0	0	0	0	0	0	0	0	0
NC_000913.3	2952092	recD	NP_417296.1	T	C	58.86	PASS	SN=0;STA=2952091;STO=2952092;TYP=SUB;R1P=530;R1M=446;R2P=551;R2M=293;AD=1820;DP=7561;MCOV=-41;PPC=1809;AF=0.2407;RAF=0.0000;LS=182241;MQS=109200;MQM=60;BQS=66870;BQM=38;EDS=55190;EDM=75;IDS=1798616;IDM=992;CED=601;HMP=0;SB=0.9994;EFF=NON_SYNONYMOUS_CODING(MODERATE|MISSENSE|Aac/Gac|N124D|608|recD|protein_coding|CODING|NP_417296.1|1|1)	GT:DP:AD:AF:RAF:SB:SC:PF	0	0.0054	0.0062	0	0	1	1	1	0.9767	1	0	0	0	0	0	0	0	0	0	0
NC_000913.3	2983226	kduD	NP_417319.1	T	A	58.23	PASS	SN=0;STA=2983225;STO=2983226;TYP=SUB;R1P=505;R1M=642;R2P=491;R2M=639;AD=2277;DP=9517;MCOV=-41;PPC=2270;AF=0.2393;RAF=0.0000;LS=222636;MQS=136620;MQM=60;BQS=83277;BQM=39;EDS=66008;EDM=75;IDS=2249324;IDM=992;CED=601;HMP=0;SB=0.9996;EFF=NON_SYNONYMOUS_CODING(MODERATE|MISSENSE|aaA/aaT|K11N|253|kduD|protein_coding|CODING|NP_417319.1|1|1)	GT:DP:AD:AF:RAF:SB:SC:PF	0	0	0	0	0	1	0.9958	1	0.9922	1	0	0	0	0	0	0	0	0	0	0
NC_000913.3	2991774	0	0	T	A	58.7	PASS	SN=0;STA=2991773;STO=2991774;TYP=SUB;R1P=903;R1M=975;R2P=921;R2M=918;AD=3717;DP=16727;MCOV=-41;PPC=3706;AF=0.2222;RAF=0.0000;LS=354771;MQS=222998;MQM=60;BQS=138232;BQM=40;EDS=104703;EDM=75;IDS=3673441;IDM=992;CED=601;HMP=0;SB=0.9999;EFF=INTERGENIC(MODIFIER||||||||||1)	GT:DP:AD:AF:RAF:SB:SC:PF	0	0	0	0	0	0.9902	0.9947	1	0.9937	1	0	0	0	0	0	0	0	0	0	0
NC_000913.3	3296005	diaA	NP_417618.1	G	C	50.7	PASS	SN=0;STA=3296004;STO=3296005;TYP=SUB;R1P=509;R1M=534;R2P=520;R2M=561;AD=2124;DP=9119;MCOV=-41;PPC=2104;AF=0.2329;RAF=0.0000;LS=208920;MQS=127437;MQM=60;BQS=77128;BQM=38;EDS=62338;EDM=75;IDS=2098654;IDM=992;CED=601;HMP=2;SB=0.9999;EFF=NON_SYNONYMOUS_CODING(MODERATE|MISSENSE|cGt/cCt|R66P|196|diaA|protein_coding|CODING|NP_417618.1|1|1|WARNING_TRANSCRIPT_NO_START_CODON)	GT:DP:AD:AF:RAF:SB:SC:PF	0	0	0	0	0	0.9915	0.976	1	1	1	0.0047	0	0	0	0	0	0	0	0	0
NC_000913.3	3454535	gspA	NP_417782.1	C	T	58.47	PASS	SN=0;STA=3454534;STO=3454535;TYP=SUB;R1P=512;R1M=558;R2P=474;R2M=551;AD=2095;DP=9279;MCOV=-41;PPC=2087;AF=0.2258;RAF=0.0000;LS=205238;MQS=125700;MQM=60;BQS=76900;BQM=39;EDS=59904;EDM=75;IDS=2070248;IDM=992;CED=601;HMP=0;SB=0.9998;EFF=SYNONYMOUS_CODING(LOW|SILENT|gtG/gtA|V288|489|gspA|protein_coding|CODING|NP_417782.1|1|1)	GT:DP:AD:AF:RAF:SB:SC:PF	0	0	0	0	0.0043	0.9826	1	1	1	1	0	0	0	0.0046	0	0	0	0	0	0
NC_000913.3	3734117	xylH	NP_418025.1	A	G	56.76	PASS	SN=0;STA=3734116;STO=3734117;TYP=SUB;R1P=335;R1M=70;R2P=176;R2M=455;AD=1036;DP=4397;MCOV=-41;PPC=1032;AF=0.2356;RAF=0.0000;LS=107100;MQS=62160;MQM=60;BQS=37227;BQM=38;EDS=30870;EDM=75;IDS=1023721;IDM=992;CED=601;HMP=0;SB=0.9999;EFF=NON_SYNONYMOUS_CODING(MODERATE|MISSENSE|tAc/tGc|Y133C|393|xylH|protein_coding|CODING|NP_418025.1|1|1)	GT:DP:AD:AF:RAF:SB:SC:PF	0	0	0	0	0	0.9885	1	1	1	1	0	0	0	0.0095	0	0	0	0	0	0
NC_000913.3	3802728	waaO	NP_418084.1	A	G	58.41	PASS	SN=0;STA=3802727;STO=3802728;TYP=SUB;R1P=947;R1M=790;R2P=905;R2M=837;AD=3479;DP=15536;MCOV=-41;PPC=3458;AF=0.2239;RAF=0.0000;LS=333285;MQS=208740;MQM=60;BQS=128832;BQM=39;EDS=97816;EDM=75;IDS=3437453;IDM=992;CED=601;HMP=0;SB=0.9998;EFF=NON_SYNONYMOUS_CODING(MODERATE|MISSENSE|Tat/Cat|Y111H|339|waaO|protein_coding|CODING|NP_418084.1|1|1)	GT:DP:AD:AF:RAF:SB:SC:PF	0	0	0	0	0	0.9957	0.9936	1	0.996	1	0	0	0	0	0	0	0.0024	0	0.0045	0
NC_000913.3	3892298	mdtL	NP_418166.1	G	A	58.44	PASS	SN=0;STA=3892297;STO=3892298;TYP=SUB;R1P=555;R1M=511;R2P=330;R2M=501;AD=1897;DP=7880;MCOV=-41;PPC=1888;AF=0.2407;RAF=0.0000;LS=189981;MQS=113820;MQM=60;BQS=70493;BQM=39;EDS=55264;EDM=75;IDS=1874787;IDM=992;CED=601;HMP=0;SB=0.9997;EFF=SYNONYMOUS_CODING(LOW|SILENT|ttG/ttA|L228|391|mdtL|protein_coding|CODING|NP_418166.1|1|1)	GT:DP:AD:AF:RAF:SB:SC:PF	0	0	0	0	0	1	0.9898	1	1	1	0	0	0	0	0	0	0	0	0	0
NC_000913.3	4071875	yihT	NP_418317.1	G	T	57.1	PASS	SN=0;STA=4071874;STO=4071875;TYP=SUB;R1P=523;R1M=431;R2P=562;R2M=424;AD=1940;DP=7922;MCOV=-41;PPC=1927;AF=0.2449;RAF=0.0000;LS=193705;MQS=116371;MQM=60;BQS=70052;BQM=39;EDS=57724;EDM=75;IDS=1916792;IDM=992;CED=601;HMP=0;SB=0.9996;EFF=SYNONYMOUS_CODING(LOW|SILENT|gtC/gtA|V259|292|yihT|protein_coding|CODING|NP_418317.1|1|1)	GT:DP:AD:AF:RAF:SB:SC:PF	0	0	0	0	0.0065	1	0.9949	1	0.9947	1	0	0	0.0056	0	0	0	0	0	0	0
NC_000913.3	4180373	rplJ	NP_418412.1	G	A	59.38	PASS	SN=0;STA=4180372;STO=4180373;TYP=SUB;R1P=626;R1M=603;R2P=628;R2M=545;AD=2402;DP=9474;MCOV=-41;PPC=2385;AF=0.2535;RAF=0.0000;LS=244694;MQS=144120;MQM=60;BQS=88253;BQM=39;EDS=72620;EDM=75;IDS=2374615;IDM=992;CED=601;HMP=0;SB=0.9998;EFF=SYNONYMOUS_CODING(LOW|SILENT|ctG/ctA|L126|165|rplJ|protein_coding|CODING|NP_418412.1|1|1)	GT:DP:AD:AF:RAF:SB:SC:PF	0	0	0	0	0	1	1	1	1	1	0	0	0	0	0	0	0	0	0	0
NC_000913.3	4341927	melA	NP_418543.1	A	T	58.16	PASS	SN=0;STA=4341926;STO=4341927;TYP=SUB;R1P=475;R1M=713;R2P=507;R2M=663;AD=2358;DP=9629;MCOV=-41;PPC=2347;AF=0.2449;RAF=0.0000;LS=231693;MQS=141480;MQM=60;BQS=86925;BQM=39;EDS=68159;EDM=74;IDS=2330499;IDM=992;CED=601;HMP=0;SB=0.9994;EFF=NON_SYNONYMOUS_CODING(MODERATE|MISSENSE|aAa/aTa|K6I|451|melA|protein_coding|CODING|NP_418543.1|1|1)	GT:DP:AD:AF:RAF:SB:SC:PF	0	0	0	0.0036	0	1	0.9957	1	1	1	0	0	0	0	0	0	0.005	0	0	0
NC_000913.3	4362103	0	0	A	T	58.48	PASS	SN=0;STA=4362102;STO=4362103;TYP=SUB;R1P=722;R1M=890;R2P=707;R2M=903;AD=3222;DP=14144;MCOV=-41;PPC=3213;AF=0.2278;RAF=0.0000;LS=311590;MQS=193320;MQM=60;BQS=118149;BQM=40;EDS=94547;EDM=75;IDS=3183457;IDM=992;CED=601;HMP=0;SB=0.9996;EFF=INTERGENIC(MODIFIER||||||||||1)	GT:DP:AD:AF:RAF:SB:SC:PF	0.0026	0.0024	0.0025	0	0	0.9977	0.9926	1	0.9877	1	0	0	0	0	0	0	0	0	0	0
NC_000913.3	2109114	wzxB	NP_416541.1	A	G	58.13	PASS	SN=0;STA=2109113;STO=2109114;TYP=SUB;R1P=924;R1M=808;R2P=927;R2M=870;AD=3529;DP=15599;MCOV=-41;PPC=3510;AF=0.2262;RAF=0.0000;LS=336337;MQS=211725;MQM=60;BQS=130589;BQM=39;EDS=101456;EDM=75;IDS=3486977;IDM=992;CED=601;HMP=1;SB=0.9998;EFF=SYNONYMOUS_CODING(LOW|SILENT|gcT/gcC|A157|415|wzxB|protein_coding|CODING|NP_416541.1|1|1)	GT:DP:AD:AF:RAF:SB:SC:PF	0	0	0	0	0	0.9915	0.9939	0.9943	0.9955	1	0	0.0023	0.0019	0	0	0	0	0	0	0
NC_000913.3	183331	cdaR	NP_414704.4	T	C	58.02	PASS	SN=0;STA=183330;STO=183331;TYP=SUB;R1P=587;R1M=421;R2P=536;R2M=445;AD=1989;DP=8560;MCOV=-41;PPC=1980;AF=0.2324;RAF=0.0000;LS=197096;MQS=119330;MQM=60;BQS=73426;BQM=39;EDS=56423;EDM=75;IDS=1965051;IDM=992;CED=601;HMP=0;SB=0.9995;EFF=NON_SYNONYMOUS_CODING(MODERATE|MISSENSE|aTg/aCg|M290T|385|cdaR|protein_coding|CODING|NP_414704.4|1|1)	GT:DP:AD:AF:RAF:SB:SC:PF	0	0	0	0	0	1	0.9951	0.9942	1	1	0	0.0045	0	0	0	0.0062	0	0	0	0
NC_000913.3	1990085	tyrP	NP_416420.1	T	C	58.67	PASS	SN=0;STA=1990084;STO=1990085;TYP=SUB;R1P=550;R1M=565;R2P=533;R2M=547;AD=2195;DP=9203;MCOV=-41;PPC=2178;AF=0.2385;RAF=0.0000;LS=217135;MQS=131700;MQM=60;BQS=81059;BQM=39;EDS=65193;EDM=75;IDS=2169202;IDM=992;CED=601;HMP=0;SB=0.9999;EFF=SYNONYMOUS_CODING(LOW|SILENT|gtT/gtC|V135|403|tyrP|protein_coding|CODING|NP_416420.1|1|1|WARNING_TRANSCRIPT_NO_START_CODON)	GT:DP:AD:AF:RAF:SB:SC:PF	0	0	0	0	0	1	0.9953	0.994	1	1	0	0	0	0.0043	0	0.0071	0	0	0	0
NC_000913.3	848315	0	0	T	C	58.4	PASS	SN=0;STA=848314;STO=848315;TYP=SUB;R1P=652;R1M=614;R2P=623;R2M=557;AD=2446;DP=10901;MCOV=-41;PPC=2432;AF=0.2244;RAF=0.0000;LS=239185;MQS=146752;MQM=60;BQS=90213;BQM=39;EDS=69984;EDM=75;IDS=2416987;IDM=992;CED=601;HMP=0;SB=0.9998;EFF=INTERGENIC(MODIFIER||||||||||1)	GT:DP:AD:AF:RAF:SB:SC:PF	0	0	0	0.0033	0	1	0.9963	0.994	1	1	0	0	0	0	0	0	0	0	0	0
NC_000913.3	667216	mrdA	NP_415168.1	G	A	58.11	PASS	SN=0;STA=667215;STO=667216;TYP=SUB;R1P=524;R1M=343;R2P=510;R2M=520;AD=1897;DP=7758;MCOV=-41;PPC=1888;AF=0.2445;RAF=0.0000;LS=187633;MQS=113820;MQM=60;BQS=67709;BQM=39;EDS=53082;EDM=75;IDS=1871811;IDM=992;CED=601;HMP=1;SB=0.9997;EFF=SYNONYMOUS_CODING(LOW|SILENT|ccC/ccT|P334|633|mrdA|protein_coding|CODING|NP_415168.1|1|1)	GT:DP:AD:AF:RAF:SB:SC:PF	0	0	0.0043	0.0055	0	1	0.9874	0.9937	0.9902	1	0	0	0.0054	0	0.0059	0	0	0	0	0
NC_000913.3	3755113	aldB	NP_418045.4	C	A	58.04	PASS	SN=0;STA=3755112;STO=3755113;TYP=SUB;R1P=495;R1M=477;R2P=395;R2M=498;AD=1865;DP=7614;MCOV=-41;PPC=1860;AF=0.2449;RAF=0.0000;LS=185164;MQS=111900;MQM=60;BQS=68202;BQM=39;EDS=53810;EDM=75;IDS=1843181;IDM=992;CED=601;HMP=0;SB=0.9998;EFF=NON_SYNONYMOUS_CODING(MODERATE|MISSENSE|Gct/Tct|A467S|512|aldB|protein_coding|CODING|NP_418045.4|1|1)	GT:DP:AD:AF:RAF:SB:SC:PF	0	0	0	0	0	0.9892	1	0.9936	0.9883	1	0	0.0051	0	0	0	0	0	0	0	0.0053
NC_000913.3	3698738	bcsG	NP_417995.1	T	G	43.32	PASS	SN=0;STA=3698737;STO=3698738;TYP=SUB;R1P=434;R1M=397;R2P=464;R2M=411;AD=1706;DP=7001;MCOV=-41;PPC=1698;AF=0.2437;RAF=0.0070;LS=170898;MQS=102360;MQM=60;BQS=62319;BQM=39;EDS=50728;EDM=74;IDS=1686033;IDM=992;CED=601;HMP=6;SB=0.9998;EFF=SYNONYMOUS_CODING(LOW|SILENT|ggT/ggG|G175|559|bcsG|protein_coding|CODING|NP_417995.1|1|1)	GT:DP:AD:AF:RAF:SB:SC:PF	0	0.0124	0	0	0	0.9813	1	0.9935	0.9943	1	0	0	0	0.0055	0	0	0	0	0	0.0059
NC_000913.3	531284	0	0	A	G	50.66	PASS	SN=0;STA=531283;STO=531284;TYP=SUB;R1P=583;R1M=515;R2P=470;R2M=499;AD=2067;DP=8600;MCOV=-41;PPC=2047;AF=0.2403;RAF=0.0000;LS=202728;MQS=124020;MQM=60;BQS=75420;BQM=39;EDS=59695;EDM=75;IDS=2042444;IDM=992;CED=601;HMP=2;SB=0.9999;EFF=INTERGENIC(MODIFIER||||||||||1)	GT:DP:AD:AF:RAF:SB:SC:PF	0	0	0	0	0.0047	0.9868	0.9809	0.9935	1	1	0	0	0	0	0	0.0063	0.0043	0	0	0
NC_000913.3	1606910	lsrF	NP_416034.1	G	T	57.48	PASS	SN=0;STA=1606909;STO=1606910;TYP=SUB;R1P=527;R1M=545;R2P=571;R2M=521;AD=2164;DP=11216;MCOV=-41;PPC=2153;AF=0.1929;RAF=0.0000;LS=211388;MQS=129840;MQM=60;BQS=78542;BQM=39;EDS=65059;EDM=75;IDS=2137754;IDM=992;CED=601;HMP=0;SB=0.9999;EFF=NON_SYNONYMOUS_CODING(MODERATE|MISSENSE|Gcg/Tcg|A271S|291|lsrF|protein_coding|CODING|NP_416034.1|1|1)	GT:DP:AD:AF:RAF:SB:SC:PF	0.0024	0.0024	0	0	0	0.996	0.9912	0.9935	0.9916	1	0.0042	0	0	0	0	0.0063	0	0	0	0.0044
NC_000913.3	4259905	zur	NP_418470.4	G	A	58.19	PASS	SN=0;STA=4259904;STO=4259905;TYP=SUB;R1P=320;R1M=470;R2P=707;R2M=523;AD=2020;DP=8383;MCOV=-41;PPC=2004;AF=0.2410;RAF=0.0000;LS=200038;MQS=121200;MQM=60;BQS=73626;BQM=39;EDS=60824;EDM=75;IDS=1995293;IDM=992;CED=601;HMP=0;SB=0.9999;EFF=SYNONYMOUS_CODING(LOW|SILENT|cgC/cgT|R33|171|zur|protein_coding|CODING|NP_418470.4|1|1)	GT:DP:AD:AF:RAF:SB:SC:PF	0	0	0	0	0	1	0.9958	0.9935	0.9949	1	0	0	0	0	0	0	0	0	0	0
NC_000913.3	898794	rlmC	NP_415380.1	T	C	46.49	PASS	SN=0;STA=898793;STO=898794;TYP=SUB;R1P=440;R1M=435;R2P=434;R2M=486;AD=1795;DP=7512;MCOV=-41;PPC=1788;AF=0.2390;RAF=0.0000;LS=178133;MQS=107700;MQM=60;BQS=65523;BQM=39;EDS=51747;EDM=74;IDS=1773597;IDM=992;CED=601;HMP=4;SB=0.9999;EFF=NON_SYNONYMOUS_CODING(MODERATE|MISSENSE|Tca/Cca|S93P|375|rlmC|protein_coding|CODING|NP_415380.1|1|1)	GT:DP:AD:AF:RAF:SB:SC:PF	0	0	0	0	0	0.9785	0.9886	0.9934	0.9874	1	0	0	0	0	0	0	0	0	0	0
NC_000913.3	1121275	dinI	NP_415579.1	C	T	58.03	PASS	SN=0;STA=1121274;STO=1121275;TYP=SUB;R1P=483;R1M=736;R2P=552;R2M=719;AD=2490;DP=11026;MCOV=-41;PPC=2478;AF=0.2258;RAF=0.0000;LS=240744;MQS=149394;MQM=60;BQS=91985;BQM=39;EDS=72514;EDM=75;IDS=2460603;IDM=992;CED=601;HMP=0;SB=0.9994;EFF=STOP_GAINED(HIGH|NONSENSE|tgG/tgA|W71*|81|dinI|protein_coding|CODING|NP_415579.1|1|1)	GT:DP:AD:AF:RAF:SB:SC:PF	0	0	0	0	0.0029	0.9937	0.9914	0.9934	1	1	0	0	0	0	0	0	0	0	0	0
NC_000913.3	1284795	narH	NP_415743.1	G	T	57.68	PASS	SN=0;STA=1284794;STO=1284795;TYP=SUB;R1P=459;R1M=555;R2P=477;R2M=186;AD=1677;DP=6995;MCOV=-41;PPC=1663;AF=0.2397;RAF=0.0000;LS=167934;MQS=100620;MQM=60;BQS=61547;BQM=39;EDS=49604;EDM=75;IDS=1648419;IDM=992;CED=601;HMP=1;SB=0.9996;EFF=NON_SYNONYMOUS_CODING(MODERATE|MISSENSE|Gat/Tat|D398Y|512|narH|protein_coding|CODING|NP_415743.1|1|1)	GT:DP:AD:AF:RAF:SB:SC:PF	0	0	0.0063	0	0	1	0.9942	0.9932	1	1	0.0065	0	0.006	0	0	0.006	0	0	0	0
NC_000913.3	4372278	groL	NP_418567.1	G	T	57.87	PASS	SN=0;STA=4372277;STO=4372278;TYP=SUB;R1P=500;R1M=489;R2P=464;R2M=441;AD=1894;DP=7849;MCOV=-41;PPC=1881;AF=0.2413;RAF=0.0000;LS=185880;MQS=113640;MQM=60;BQS=69321;BQM=39;EDS=56066;EDM=75;IDS=1871481;IDM=992;CED=601;HMP=0;SB=0.9999;EFF=SYNONYMOUS_CODING(LOW|SILENT|gcG/gcT|A418|548|groL|protein_coding|CODING|NP_418567.1|1|1)	GT:DP:AD:AF:RAF:SB:SC:PF	0	0	0.0056	0	0	0.9953	0.995	0.9932	1	1	0	0.005	0	0	0	0	0	0	0	0.0058
NC_000913.3	681145	djlC	NP_415182.1	C	T	58.13	PASS	SN=0;STA=681144;STO=681145;TYP=SUB;R1P=601;R1M=559;R2P=593;R2M=637;AD=2390;DP=10056;MCOV=-41;PPC=2379;AF=0.2377;RAF=0.0000;LS=232383;MQS=143396;MQM=60;BQS=87901;BQM=39;EDS=68768;EDM=75;IDS=2361118;IDM=992;CED=601;HMP=0;SB=1.0000;EFF=NON_SYNONYMOUS_CODING(MODERATE|MISSENSE|Cgg/Tgg|R312W|483|djlC|protein_coding|CODING|NP_415182.1|1|1)	GT:DP:AD:AF:RAF:SB:SC:PF	0	0	0	0.004	0.0039	0.9927	0.9805	0.993	0.9887	1	0	0.0044	0.0039	0	0	0.0072	0	0	0	0
NC_000913.3	793204	modF	NP_415281.1	G	A	50.84	PASS	SN=0;STA=793203;STO=793204;TYP=SUB;R1P=462;R1M=467;R2P=488;R2M=468;AD=1885;DP=8072;MCOV=-41;PPC=1877;AF=0.2335;RAF=0.0000;LS=185954;MQS=113100;MQM=60;BQS=69586;BQM=39;EDS=55103;EDM=75;IDS=1862494;IDM=992;CED=601;HMP=2;SB=1.0000;EFF=SYNONYMOUS_CODING(LOW|SILENT|ttC/ttT|F195|490|modF|protein_coding|CODING|NP_415281.1|1|1)	GT:DP:AD:AF:RAF:SB:SC:PF	0	0	0	0	0	1	0.9869	0.9928	1	1	0	0	0.0047	0	0	0	0	0	0	0
NC_000913.3	2440029	yfcJ	NP_416825.1	A	G	58.24	PASS	SN=0;STA=2440028;STO=2440029;TYP=SUB;R1P=526;R1M=508;R2P=546;R2M=528;AD=2108;DP=8781;MCOV=-41;PPC=2099;AF=0.2401;RAF=0.0000;LS=206909;MQS=126459;MQM=60;BQS=76581;BQM=39;EDS=63456;EDM=75;IDS=2082345;IDM=992;CED=601;HMP=0;SB=0.9999;EFF=NON_SYNONYMOUS_CODING(MODERATE|MISSENSE|gTa/gCa|V31A|392|yfcJ|protein_coding|CODING|NP_416825.1|1|1)	GT:DP:AD:AF:RAF:SB:SC:PF	0	0	0	0	0	1	1	0.9928	0.9956	1	0	0	0	0	0	0	0	0	0	0
NC_000913.3	4216608	aceB	NP_418438.1	G	T	58.4	PASS	SN=0;STA=4216607;STO=4216608;TYP=SUB;R1P=567;R1M=462;R2P=522;R2M=498;AD=2049;DP=8605;MCOV=-41;PPC=2034;AF=0.2381;RAF=0.0000;LS=200549;MQS=122940;MQM=60;BQS=75365;BQM=39;EDS=59499;EDM=75;IDS=2024285;IDM=992;CED=601;HMP=0;SB=0.9998;EFF=SYNONYMOUS_CODING(LOW|SILENT|gcG/gcT|A377|533|aceB|protein_coding|CODING|NP_418438.1|1|1)	GT:DP:AD:AF:RAF:SB:SC:PF	0.0052	0	0.0049	0	0.0047	0.9955	0.9954	0.9921	1	1	0.0055	0	0	0	0	0	0.0046	0	0.0046	0
NC_000913.3	3625989	yhhJ	NP_417942.6	G	T	50.7	PASS	SN=0;STA=3625988;STO=3625989;TYP=SUB;R1P=444;R1M=417;R2P=456;R2M=469;AD=1786;DP=7304;MCOV=-41;PPC=1777;AF=0.2445;RAF=0.0062;LS=176267;MQS=107148;MQM=60;BQS=65231;BQM=39;EDS=51288;EDM=75;IDS=1764713;IDM=992;CED=601;HMP=2;SB=1.0000;EFF=STOP_GAINED(HIGH|NONSENSE|tCa/tAa|S272*|374|yhhJ|protein_coding|CODING|NP_417942.6|1|1)	GT:DP:AD:AF:RAF:SB:SC:PF	0	0	0.0074	0	0	1	0.994	0.992	1	1	0	0.0054	0	0.0058	0	0.006	0	0.0058	0	0.0051
NC_000913.3	2951075	recD	NP_417296.1	G	A	57.7	PASS	SN=0;STA=2951074;STO=2951075;TYP=SUB;R1P=491;R1M=432;R2P=452;R2M=480;AD=1855;DP=7523;MCOV=-41;PPC=1848;AF=0.2466;RAF=0.0000;LS=182020;MQS=111300;MQM=60;BQS=68928;BQM=39;EDS=51971;EDM=75;IDS=1832206;IDM=992;CED=601;HMP=0;SB=0.9999;EFF=STOP_GAINED(HIGH|NONSENSE|Caa/Taa|Q463*|608|recD|protein_coding|CODING|NP_417296.1|1|1)	GT:DP:AD:AF:RAF:SB:SC:PF	0	0	0	0	0	1	0.9946	0.9848	1	1	0	0	0	0.0058	0	0	0	0	0	0
NC_000913.3	2969472	0	0	A	G	57.49	PASS	SN=0;STA=2969471;STO=2969472;TYP=SUB;R1P=543;R1M=698;R2P=526;R2M=757;AD=2524;DP=11144;MCOV=-41;PPC=2507;AF=0.2265;RAF=0.0000;LS=243457;MQS=151436;MQM=60;BQS=93602;BQM=39;EDS=69564;EDM=75;IDS=2493821;IDM=992;CED=601;HMP=0;SB=0.9995;EFF=INTERGENIC(MODIFIER||||||||||1)	GT:DP:AD:AF:RAF:SB:SC:PF	0	0	0	0	0	1	0.9941	0.9848	0.9872	1	0	0	0	0	0.0033	0	0	0	0	0
NC_000913.3	3873917	dgoK	NP_418148.1	G	A	50.13	PASS	SN=0;STA=3873916;STO=3873917;TYP=SUB;R1P=97;R1M=87;R2P=91;R2M=84;AD=359;DP=7722;MCOV=-41;PPC=350;AF=0.0465;RAF=0.0000;LS=39900;MQS=21532;MQM=60;BQS=12849;BQM=39;EDS=11863;EDM=75;IDS=351783;IDM=992;CED=601;HMP=2;SB=0.9998;EFF=SYNONYMOUS_CODING(LOW|SILENT|gcC/gcT|A186|292|dgoK|protein_coding|CODING|NP_418148.1|1|1)	GT:DP:AD:AF:RAF:SB:SC:PF	0	0	0	0	0	0.0057	0	0.0357	1	1	0	0.0114	0	0.0044	0	0.008	0	0	0	0
NC_000913.3	1603100	lsrC	NP_416031.1	G	A	54.22	PASS	SN=0;STA=1603099;STO=1603100;TYP=SUB;R1P=57;R1M=27;R2P=38;R2M=38;AD=160;DP=11217;MCOV=-41;PPC=159;AF=0.0143;RAF=0.0000;LS=22152;MQS=9596;MQM=60;BQS=5316;BQM=39;EDS=5835;EDM=74;IDS=155780;IDM=992;CED=601;HMP=1;SB=0.9994;EFF=NON_SYNONYMOUS_CODING(MODERATE|MISSENSE|Gac/Aac|D28N|342|lsrC|protein_coding|CODING|NP_416031.1|1|1)	GT:DP:AD:AF:RAF:SB:SC:PF	0	0	0	0.0027	0.0027	0	0	0.0118	0	1	0	0.0052	0	0	0	0	0.0053	0	0	0
NC_000913.3	1906292	rlmA	NP_416336.1	G	A	57.2	PASS	SN=0;STA=1906291;STO=1906292;TYP=SUB;R1P=37;R1M=35;R2P=26;R2M=30;AD=128;DP=7308;MCOV=-41;PPC=128;AF=0.0175;RAF=0.0000;LS=17894;MQS=7680;MQM=60;BQS=4774;BQM=39;EDS=4775;EDM=74;IDS=126761;IDM=992;CED=601;HMP=0;SB=0.9999;EFF=STOP_GAINED(HIGH|NONSENSE|Cag/Tag|Q257*|269|rlmA|protein_coding|CODING|NP_416336.1|1|1)	GT:DP:AD:AF:RAF:SB:SC:PF	0	0	0	0	0.0068	0	0	0.008	0	1	0	0	0.0054	0	0	0	0	0	0	0
NC_000913.3	1863549	gapA	NP_416293.1	T	C	58.04	PASS	SN=0;STA=1863548;STO=1863549;TYP=SUB;R1P=115;R1M=93;R2P=101;R2M=86;AD=395;DP=9965;MCOV=-41;PPC=392;AF=0.0396;RAF=0.0000;LS=44030;MQS=23700;MQM=60;BQS=14695;BQM=39;EDS=12586;EDM=74;IDS=390646;IDM=992;CED=601;HMP=0;SB=0.9997;EFF=NON_SYNONYMOUS_CODING(MODERATE|MISSENSE|gTt/gCt|V260A|331|gapA|protein_coding|CODING|NP_416293.1|1|1)	GT:DP:AD:AF:RAF:SB:SC:PF	0	0	0	0	0.0036	0	0	0.0077	0.9957	1	0	0	0	0	0	0	0	0	0	0
NC_000913.3	1738716	purR	NP_416175.1	T	C	54.88	PASS	SN=0;STA=1738715;STO=1738716;TYP=SUB;R1P=104;R1M=70;R2P=92;R2M=69;AD=335;DP=8544;MCOV=-41;PPC=335;AF=0.0392;RAF=0.0000;LS=38254;MQS=20100;MQM=60;BQS=12282;BQM=39;EDS=10710;EDM=74;IDS=331282;IDM=992;CED=601;HMP=1;SB=0.9994;EFF=SYNONYMOUS_CODING(LOW|SILENT|caT/caC|H291|341|purR|protein_coding|CODING|NP_416175.1|1|1)	GT:DP:AD:AF:RAF:SB:SC:PF	0	0	0	0	0	0	0	0.0075	1	1	0	0	0	0	0	0	0.0047	0	0	0
NC_000913.3	3641371	dtpB	NP_417953.1	C	T	50.59	PASS	SN=0;STA=3641370;STO=3641371;TYP=SUB;R1P=100;R1M=85;R2P=78;R2M=87;AD=350;DP=8891;MCOV=-41;PPC=349;AF=0.0394;RAF=0.0000;LS=38321;MQS=21000;MQM=60;BQS=12945;BQM=39;EDS=11439;EDM=73;IDS=345836;IDM=992;CED=601;HMP=2;SB=0.9999;EFF=SYNONYMOUS_CODING(LOW|SILENT|ttC/ttT|F170|489|dtpB|protein_coding|CODING|NP_417953.1|1|1)	GT:DP:AD:AF:RAF:SB:SC:PF	0	0	0	0	0	0	0	0.0073	1	1	0	0	0	0	0	0	0	0	0	0
NC_000913.3	125979	aceF	NP_414657.1	T	C	46.27	PASS	SN=0;STA=125978;STO=125979;TYP=SUB;R1P=87;R1M=96;R2P=93;R2M=72;AD=348;DP=8556;MCOV=-41;PPC=345;AF=0.0407;RAF=0.0000;LS=39280;MQS=20880;MQM=60;BQS=12544;BQM=39;EDS=11895;EDM=75;IDS=344142;IDM=992;CED=601;HMP=4;SB=0.9999;EFF=SYNONYMOUS_CODING(LOW|SILENT|gcT/gcC|A95|630|aceF|protein_coding|CODING|NP_414657.1|1|1)	GT:DP:AD:AF:RAF:SB:SC:PF	0	0	0	0	0	0	0	0.0072	0.9948	1	0	0	0	0	0	0.0056	0	0	0	0
NC_000913.3	789246	galK	NP_415278.1	A	G	58.01	PASS	SN=0;STA=789245;STO=789246;TYP=SUB;R1P=99;R1M=76;R2P=69;R2M=78;AD=322;DP=7819;MCOV=-41;PPC=320;AF=0.0412;RAF=0.0000;LS=36613;MQS=19308;MQM=60;BQS=11772;BQM=39;EDS=10966;EDM=75;IDS=318400;IDM=992;CED=601;HMP=1;SB=0.9998;EFF=NON_SYNONYMOUS_CODING(MODERATE|MISSENSE|gTc/gCc|V245A|382|galK|protein_coding|CODING|NP_415278.1|1|1)	GT:DP:AD:AF:RAF:SB:SC:PF	0	0	0	0.0051	0	0	0	0.0072	1	1	0	0	0	0	0	0	0	0	0	0
NC_000913.3	3106379	nupG	NP_417439.4	G	A	57.9	PASS	SN=0;STA=3106378;STO=3106379;TYP=SUB;R1P=116;R1M=107;R2P=114;R2M=92;AD=429;DP=9726;MCOV=-41;PPC=425;AF=0.0441;RAF=0.0000;LS=47211;MQS=25740;MQM=60;BQS=15661;BQM=39;EDS=13727;EDM=74;IDS=424054;IDM=992;CED=601;HMP=0;SB=0.9997;EFF=SYNONYMOUS_CODING(LOW|SILENT|gcG/gcA|A222|418|nupG|protein_coding|CODING|NP_417439.4|1|1)	GT:DP:AD:AF:RAF:SB:SC:PF	0	0.0036	0	0	0	0.004	0	0.007	1	1	0	0	0.004	0	0	0	0	0	0	0.004
NC_000913.3	2695555	0	0	C	T	46.38	PASS	SN=0;STA=2695554;STO=2695555;TYP=SUB;R1P=49;R1M=43;R2P=34;R2M=30;AD=156;DP=8120;MCOV=-41;PPC=156;AF=0.0192;RAF=0.0046;LS=21678;MQS=9360;MQM=60;BQS=5807;BQM=39;EDS=5668;EDM=75;IDS=154343;IDM=992;CED=601;HMP=4;SB=0.9998;EFF=INTERGENIC(MODIFIER||||||||||1)	GT:DP:AD:AF:RAF:SB:SC:PF	0	0	0	0	0	0	0.0049	0.0069	0.005	1	0	0	0	0	0	0	0	0	0	0
NC_000913.3	1037895	cbdA	NP_415497.1	G	A	57.38	PASS	SN=0;STA=1037894;STO=1037895;TYP=SUB;R1P=95;R1M=101;R2P=91;R2M=104;AD=391;DP=8765;MCOV=-41;PPC=387;AF=0.0446;RAF=0.0045;LS=43917;MQS=23460;MQM=60;BQS=14175;BQM=39;EDS=12291;EDM=75;IDS=386607;IDM=992;CED=601;HMP=0;SB=0.9998;EFF=SYNONYMOUS_CODING(LOW|SILENT|acG/acA|T52|514|cbdA|protein_coding|CODING|NP_415497.1|1|1)	GT:DP:AD:AF:RAF:SB:SC:PF	0	0	0	0	0	0	0	0.0069	0.9909	1	0	0	0	0	0	0.0074	0	0	0	0
NC_000913.3	511882	glsA	NP_415018.1	G	T	58.02	PASS	SN=0;STA=511881;STO=511882;TYP=SUB;R1P=98;R1M=100;R2P=82;R2M=101;AD=381;DP=8509;MCOV=-41;PPC=377;AF=0.0448;RAF=0.0000;LS=43308;MQS=22860;MQM=60;BQS=13825;BQM=39;EDS=12838;EDM=75;IDS=373287;IDM=992;CED=601;HMP=0;SB=0.9998;EFF=NON_SYNONYMOUS_CODING(MODERATE|MISSENSE|gGc/gTc|G81V|310|glsA|protein_coding|CODING|NP_415018.1|1|1)	GT:DP:AD:AF:RAF:SB:SC:PF	0	0	0	0	0	0	0	0.0069	1	1	0	0	0.0059	0	0.0048	0	0	0	0	0
NC_000913.3	220910	metQ	NP_414739.1	T	C	57.59	PASS	SN=0;STA=220909;STO=220910;TYP=SUB;R1P=90;R1M=94;R2P=99;R2M=123;AD=406;DP=10005;MCOV=-41;PPC=404;AF=0.0406;RAF=0.0038;LS=43661;MQS=24360;MQM=60;BQS=14743;BQM=39;EDS=12419;EDM=75;IDS=401033;IDM=992;CED=601;HMP=0;SB=0.9997;EFF=NON_SYNONYMOUS_CODING(MODERATE|MISSENSE|Acc/Gcc|T7A|271|metQ|protein_coding|CODING|NP_414739.1|1|1)	GT:DP:AD:AF:RAF:SB:SC:PF	0	0	0	0	0	0	0	0.0068	0.9961	1	0.0042	0	0.0039	0.0085	0	0	0	0	0	0.0039
NC_000913.3	3129973	yghO	b2981	T	A	58.13	PASS	SN=0;STA=3129972;STO=3129973;TYP=SUB;R1P=97;R1M=81;R2P=91;R2M=93;AD=362;DP=8609;MCOV=-41;PPC=360;AF=0.0420;RAF=0.0000;LS=40690;MQS=21720;MQM=60;BQS=13148;BQM=39;EDS=12555;EDM=75;IDS=357643;IDM=992;CED=601;HMP=1;SB=0.9999;EFF=SYNONYMOUS_CODING(LOW|SILENT|atA/atT|I57|366|yghO|protein_coding|CODING|b2981|1|1|WARNING_TRANSCRIPT_NO_START_CODON)	GT:DP:AD:AF:RAF:SB:SC:PF	0	0	0	0	0	0	0.0046	0.0068	1	1	0.0045	0	0	0	0	0	0	0	0	0
NC_000913.3	1953633	cmoB	NP_416385.1	G	T	57.69	PASS	SN=0;STA=1953632;STO=1953633;TYP=SUB;R1P=54;R1M=35;R2P=44;R2M=32;AD=165;DP=8905;MCOV=-41;PPC=164;AF=0.0185;RAF=0.0000;LS=22462;MQS=9897;MQM=60;BQS=6166;BQM=39;EDS=6287;EDM=73;IDS=163126;IDM=992;CED=601;HMP=0;SB=0.9994;EFF=SYNONYMOUS_CODING(LOW|SILENT|acG/acT|T64|323|cmoB|protein_coding|CODING|NP_416385.1|1|1)	GT:DP:AD:AF:RAF:SB:SC:PF	0	0	0.0094	0	0.0044	0	0.0044	0.0067	0.0044	1	0.0044	0.009	0.0044	0	0	0	0.0045	0	0	0.01
NC_000913.3	2387898	yfbN	NP_416776.1	C	T	58.72	PASS	SN=0;STA=2387897;STO=2387898;TYP=SUB;R1P=140;R1M=148;R2P=139;R2M=163;AD=590;DP=14203;MCOV=-41;PPC=585;AF=0.0415;RAF=0.0000;LS=62976;MQS=35400;MQM=60;BQS=21938;BQM=39;EDS=19294;EDM=74;IDS=583217;IDM=992;CED=601;HMP=0;SB=0.9998;EFF=NON_SYNONYMOUS_CODING(MODERATE|MISSENSE|Gca/Aca|A177T|238|yfbN|protein_coding|CODING|NP_416776.1|1|1)	GT:DP:AD:AF:RAF:SB:SC:PF	0	0	0	0	0	0	0.0023	0.0065	1	1	0	0	0.0022	0	0	0	0.0053	0	0	0
NC_000913.3	402337	phoA	NP_414917.2	T	C	58.31	PASS	SN=0;STA=402336;STO=402337;TYP=SUB;R1P=79;R1M=105;R2P=96;R2M=107;AD=387;DP=8213;MCOV=-41;PPC=381;AF=0.0471;RAF=0.0000;LS=44692;MQS=23220;MQM=60;BQS=13984;BQM=39;EDS=13032;EDM=75;IDS=382619;IDM=992;CED=601;HMP=0;SB=0.9997;EFF=SYNONYMOUS_CODING(LOW|SILENT|agT/agC|S197|471|phoA|protein_coding|CODING|NP_414917.2|1|1|WARNING_TRANSCRIPT_NO_START_CODON)	GT:DP:AD:AF:RAF:SB:SC:PF	0	0	0	0	0	0	0	0.0063	0.9947	1	0.0053	0	0	0	0.0055	0	0	0	0	0
NC_000913.3	469982	mdlA	NP_414982.1	C	T	58.16	PASS	SN=0;STA=469981;STO=469982;TYP=SUB;R1P=71;R1M=79;R2P=91;R2M=92;AD=333;DP=7609;MCOV=-41;PPC=332;AF=0.0438;RAF=0.0000;LS=38132;MQS=19980;MQM=60;BQS=12403;BQM=39;EDS=11482;EDM=75;IDS=329350;IDM=992;CED=601;HMP=1;SB=0.9999;EFF=NON_SYNONYMOUS_CODING(MODERATE|MISSENSE|aCt/aTt|T371I|590|mdlA|protein_coding|CODING|NP_414982.1|1|1|WARNING_TRANSCRIPT_NO_START_CODON)	GT:DP:AD:AF:RAF:SB:SC:PF	0.0054	0.006	0	0	0	0	0	0.0063	1	1	0	0	0	0	0	0	0	0	0	0
NC_000913.3	152269	yadM	NP_414680.4	C	T	57.88	PASS	SN=0;STA=152268;STO=152269;TYP=SUB;R1P=153;R1M=122;R2P=155;R2M=111;AD=541;DP=12602;MCOV=-41;PPC=538;AF=0.0429;RAF=0.0000;LS=58505;MQS=32460;MQM=60;BQS=19879;BQM=39;EDS=16626;EDM=75;IDS=534766;IDM=992;CED=601;HMP=0;SB=0.9995;EFF=NON_SYNONYMOUS_CODING(MODERATE|MISSENSE|Gcg/Acg|A182T|189|yadM|protein_coding|CODING|NP_414680.4|1|1)	GT:DP:AD:AF:RAF:SB:SC:PF	0	0	0	0.0032	0	0	0	0.0062	0.9972	1	0	0	0	0	0.0059	0	0	0	0	0
NC_000913.3	98396	murD	NP_414630.1	T	A	58.67	PASS	SN=0;STA=98395;STO=98396;TYP=SUB;R1P=58;R1M=39;R2P=42;R2M=56;AD=195;DP=8586;MCOV=-41;PPC=194;AF=0.0227;RAF=0.0000;LS=27311;MQS=11700;MQM=60;BQS=7421;BQM=39;EDS=7492;EDM=74;IDS=193282;IDM=992;CED=601;HMP=1;SB=0.9999;EFF=STOP_GAINED(HIGH|NONSENSE|tTa/tAa|L437*|438|murD|protein_coding|CODING|NP_414630.1|1|1)	GT:DP:AD:AF:RAF:SB:SC:PF	0	0	0	0	0	0.0045	0	0.0061	0.0049	1	0	0	0	0	0	0	0	0	0	0
NC_000913.3	317190	0	0	C	T	58.24	PASS	SN=0;STA=317189;STO=317190;TYP=SUB;R1P=50;R1M=27;R2P=40;R2M=55;AD=172;DP=13822;MCOV=-41;PPC=172;AF=0.0124;RAF=0.0000;LS=23762;MQS=10320;MQM=60;BQS=6429;BQM=39;EDS=6765;EDM=74;IDS=170061;IDM=992;CED=601;HMP=0;SB=0.9998;EFF=INTERGENIC(MODIFIER||||||||||1)	GT:DP:AD:AF:RAF:SB:SC:PF	0	0.0024	0	0	0	0	0	0.006	0.0022	1	0	0	0	0	0	0	0	0	0	0
NC_000913.3	1731508	lhr	NP_416170.1	G	A	57.99	PASS	SN=0;STA=1731507;STO=1731508;TYP=SUB;R1P=82;R1M=91;R2P=86;R2M=87;AD=346;DP=7095;MCOV=-41;PPC=343;AF=0.0488;RAF=0.0000;LS=40255;MQS=20760;MQM=60;BQS=12598;BQM=39;EDS=12141;EDM=75;IDS=341513;IDM=992;CED=601;HMP=0;SB=0.9999;EFF=NON_SYNONYMOUS_CODING(MODERATE|MISSENSE|Gcc/Acc|A808T|1538|lhr|protein_coding|CODING|NP_416170.1|1|1)	GT:DP:AD:AF:RAF:SB:SC:PF	0	0	0	0	0.0063	0	0	0.006	0.988	1	0	0	0	0.0063	0	0	0	0	0	0
NC_000913.3	476232	ybaZ	NP_414988.1	C	T	58.01	PASS	SN=0;STA=476231;STO=476232;TYP=SUB;R1P=75;R1M=109;R2P=74;R2M=117;AD=375;DP=8585;MCOV=-41;PPC=373;AF=0.0437;RAF=0.0000;LS=43013;MQS=22499;MQM=60;BQS=13560;BQM=39;EDS=12723;EDM=75;IDS=370047;IDM=992;CED=601;HMP=0;SB=0.9993;EFF=NON_SYNONYMOUS_CODING(MODERATE|MISSENSE|gGc/gAc|G47D|129|ybaZ|protein_coding|CODING|NP_414988.1|1|1)	GT:DP:AD:AF:RAF:SB:SC:PF	0	0	0	0	0	0	0	0.0058	1	1	0	0	0	0	0	0	0	0	0	0
NC_000913.3	2081509	dacD	NP_416514.4	G	A	57.52	PASS	SN=0;STA=2081508;STO=2081509;TYP=SUB;R1P=101;R1M=117;R2P=106;R2M=97;AD=421;DP=9798;MCOV=-41;PPC=417;AF=0.0430;RAF=0.0000;LS=45467;MQS=25260;MQM=60;BQS=15359;BQM=39;EDS=13217;EDM=75;IDS=415969;IDM=992;CED=601;HMP=0;SB=0.9999;EFF=NON_SYNONYMOUS_CODING(MODERATE|MISSENSE|Cgg/Tgg|R347W|388|dacD|protein_coding|CODING|NP_416514.4|1|1)	GT:DP:AD:AF:RAF:SB:SC:PF	0.0039	0	0.0035	0	0	0	0	0.0058	0.9892	1	0	0	0	0	0	0	0	0	0	0
NC_000913.3	1737263	ydhP	NP_416174.1	G	T	57.91	PASS	SN=0;STA=1737262;STO=1737263;TYP=SUB;R1P=78;R1M=101;R2P=117;R2M=99;AD=395;DP=8460;MCOV=-41;PPC=393;AF=0.0467;RAF=0.0000;LS=44962;MQS=23700;MQM=60;BQS=14127;BQM=38;EDS=13004;EDM=75;IDS=390451;IDM=992;CED=601;HMP=0;SB=1.0000;EFF=NON_SYNONYMOUS_CODING(MODERATE|MISSENSE|Ctg/Atg|L10M|389|ydhP|protein_coding|CODING|NP_416174.1|1|1)	GT:DP:AD:AF:RAF:SB:SC:PF	0	0	0	0	0	0	0.0043	0.0056	1	1	0	0	0	0	0	0	0	0	0	0.0049
NC_000913.3	1294314	0	0	C	T	58.15	PASS	SN=0;STA=1294313;STO=1294314;TYP=SUB;R1P=92;R1M=137;R2P=95;R2M=151;AD=475;DP=11518;MCOV=-41;PPC=474;AF=0.0412;RAF=0.0000;LS=51637;MQS=28500;MQM=60;BQS=17206;BQM=39;EDS=14973;EDM=75;IDS=469382;IDM=992;CED=601;HMP=1;SB=0.9993;EFF=INTERGENIC(MODIFIER||||||||||1)	GT:DP:AD:AF:RAF:SB:SC:PF	0	0	0	0	0	0	0	0.0055	0.9934	1	0	0.0033	0	0	0	0	0	0	0.0036	0
NC_000913.3	1596931	yneO	b4696	C	T	58.14	PASS	SN=0;STA=1596930;STO=1596931;TYP=SUB;R1P=60;R1M=36;R2P=27;R2M=57;AD=180;DP=13628;MCOV=-41;PPC=180;AF=0.0132;RAF=0.0000;LS=24946;MQS=10800;MQM=60;BQS=6766;BQM=39;EDS=6462;EDM=75;IDS=178372;IDM=992;CED=601;HMP=0;SB=0.9999;EFF=NON_SYNONYMOUS_CODING(MODERATE|MISSENSE|Gtt/Att|V353I|1773|yneO|protein_coding|CODING|b4696|1|1)	GT:DP:AD:AF:RAF:SB:SC:PF	0	0.0017	0	0.0034	0	0	0.0032	0.0054	0.0035	1	0.0032	0	0	0	0	0	0	0.0034	0.0035	0
NC_000913.3	1383944	ycjW	NP_415836.1	A	G	58.54	PASS	SN=0;STA=1383943;STO=1383944;TYP=SUB;R1P=83;R1M=128;R2P=96;R2M=114;AD=421;DP=9134;MCOV=-41;PPC=421;AF=0.0461;RAF=0.0000;LS=48114;MQS=25260;MQM=60;BQS=15532;BQM=39;EDS=13402;EDM=74;IDS=416385;IDM=992;CED=601;HMP=0;SB=0.9995;EFF=SYNONYMOUS_CODING(LOW|SILENT|taT/taC|Y6|332|ycjW|protein_coding|CODING|NP_415836.1|1|1)	GT:DP:AD:AF:RAF:SB:SC:PF	0	0.0045	0	0	0	0	0.0038	0.0053	1	1	0	0	0	0	0	0	0.0053	0	0	0
NC_000913.3	2051114	yeeJ	NP_416485.4	C	A	57.94	PASS	SN=0;STA=2051113;STO=2051114;TYP=SUB;R1P=97;R1M=110;R2P=105;R2M=113;AD=425;DP=9348;MCOV=-41;PPC=423;AF=0.0455;RAF=0.0079;LS=46058;MQS=25498;MQM=60;BQS=15565;BQM=39;EDS=13486;EDM=74;IDS=419963;IDM=992;CED=601;HMP=0;SB=0.9998;EFF=SYNONYMOUS_CODING(LOW|SILENT|acC/acA|T2059|2358|yeeJ|protein_coding|CODING|NP_416485.4|1|1)	GT:DP:AD:AF:RAF:SB:SC:PF	0	0	0	0	0	0.004	0.0136	0	1	1	0	0	0.0078	0.013	0	0	0.0047	0.0044	0.0039	0
NC_000913.3	2372828	arnE	YP_588462.1	C	T	57.59	PASS	SN=0;STA=2372827;STO=2372828;TYP=SUB;R1P=81;R1M=84;R2P=74;R2M=89;AD=328;DP=7853;MCOV=-41;PPC=325;AF=0.0418;RAF=0.0057;LS=36488;MQS=19680;MQM=60;BQS=11914;BQM=39;EDS=10667;EDM=75;IDS=324253;IDM=992;CED=601;HMP=0;SB=0.9998;EFF=NON_SYNONYMOUS_CODING(MODERATE|MISSENSE|cCg/cTg|P91L|111|arnE|protein_coding|CODING|YP_588462.1|1|1)	GT:DP:AD:AF:RAF:SB:SC:PF	0	0	0	0	0	0	0.0057	0	1	1	0	0	0	0	0	0	0	0	0	0
NC_000913.3	2364018	yfaZ	NP_416753.4	G	A	58.18	PASS	SN=0;STA=2364017;STO=2364018;TYP=SUB;R1P=126;R1M=93;R2P=108;R2M=87;AD=414;DP=9240;MCOV=-41;PPC=408;AF=0.0448;RAF=0.0054;LS=46640;MQS=24840;MQM=60;BQS=15225;BQM=39;EDS=12872;EDM=74;IDS=409174;IDM=992;CED=601;HMP=0;SB=0.9995;EFF=SYNONYMOUS_CODING(LOW|SILENT|acC/acT|T86|180|yfaZ|protein_coding|CODING|NP_416753.4|1|1)	GT:DP:AD:AF:RAF:SB:SC:PF	0.0042	0	0	0	0	0	0	0	0.9957	1	0	0	0	0	0	0	0	0	0	0
NC_000913.3	2747182	ffh	NP_417101.1	A	T	57.5	PASS	SN=0;STA=2747181;STO=2747182;TYP=SUB;R1P=81;R1M=80;R2P=78;R2M=102;AD=341;DP=7976;MCOV=-41;PPC=338;AF=0.0428;RAF=0.0054;LS=38719;MQS=20460;MQM=60;BQS=12609;BQM=39;EDS=11171;EDM=75;IDS=334611;IDM=992;CED=601;HMP=1;SB=0.9997;EFF=NON_SYNONYMOUS_CODING(MODERATE|MISSENSE|aTc/aAc|I205N|453|ffh|protein_coding|CODING|NP_417101.1|1|1)	GT:DP:AD:AF:RAF:SB:SC:PF	0	0	0	0	0	0.012	0.006	0	1	1	0	0	0	0	0.0056	0	0	0	0	0
NC_000913.3	3506991	yhfT	NP_417836.1	T	C	58.27	PASS	SN=0;STA=3506990;STO=3506991;TYP=SUB;R1P=103;R1M=102;R2P=74;R2M=109;AD=388;DP=8289;MCOV=-41;PPC=388;AF=0.0468;RAF=0.0054;LS=43798;MQS=23280;MQM=60;BQS=14317;BQM=39;EDS=12978;EDM=74;IDS=383480;IDM=992;CED=601;HMP=0;SB=0.9997;EFF=NON_SYNONYMOUS_CODING(MODERATE|MISSENSE|Aac/Gac|N116D|434|yhfT|protein_coding|CODING|NP_417836.1|1|1)	GT:DP:AD:AF:RAF:SB:SC:PF	0	0	0	0	0	0	0	0	0.9954	1	0	0	0	0	0	0	0	0	0	0
NC_000913.3	834271	dinG	NP_415320.1	A	G	58.44	PASS	SN=0;STA=834270;STO=834271;TYP=SUB;R1P=82;R1M=78;R2P=78;R2M=87;AD=325;DP=7081;MCOV=-41;PPC=320;AF=0.0459;RAF=0.0053;LS=37616;MQS=19500;MQM=60;BQS=12163;BQM=39;EDS=11063;EDM=75;IDS=321430;IDM=992;CED=601;HMP=0;SB=0.9999;EFF=NON_SYNONYMOUS_CODING(MODERATE|MISSENSE|aAa/aGa|K401R|716|dinG|protein_coding|CODING|NP_415320.1|1|1)	GT:DP:AD:AF:RAF:SB:SC:PF	0	0	0	0	0	0	0	0	1	1	0	0	0	0	0	0	0	0	0.0058	0
NC_000913.3	704717	nagE	NP_415205.1	G	C	50.48	PASS	SN=0;STA=704716;STO=704717;TYP=SUB;R1P=38;R1M=31;R2P=34;R2M=37;AD=140;DP=7148;MCOV=-41;PPC=139;AF=0.0196;RAF=0.0051;LS=19650;MQS=8400;MQM=60;BQS=5211;BQM=39;EDS=5082;EDM=74;IDS=138738;IDM=992;CED=601;HMP=2;SB=0.9999;EFF=SYNONYMOUS_CODING(LOW|SILENT|ccG/ccC|P258|648|nagE|protein_coding|CODING|NP_415205.1|1|1)	GT:DP:AD:AF:RAF:SB:SC:PF	0	0	0	0	0	0	0	0	0	1	0	0	0	0	0	0	0	0	0	0
NC_000913.3	1115314	mdtG	NP_415571.1	G	A	46.47	PASS	SN=0;STA=1115313;STO=1115314;TYP=SUB;R1P=32;R1M=42;R2P=45;R2M=32;AD=151;DP=8270;MCOV=-41;PPC=151;AF=0.0183;RAF=0.0049;LS=21114;MQS=9060;MQM=60;BQS=5668;BQM=39;EDS=5797;EDM=73;IDS=149578;IDM=992;CED=601;HMP=4;SB=0.9999;EFF=SYNONYMOUS_CODING(LOW|SILENT|gtC/gtT|V59|408|mdtG|protein_coding|CODING|NP_415571.1|1|1)	GT:DP:AD:AF:RAF:SB:SC:PF	0	0	0	0	0	0	0	0	0	1	0	0.0044	0	0	0	0	0	0	0	0
NC_000913.3	4468596	mgtA	NP_418663.1	C	T	57.8	PASS	SN=0;STA=4468595;STO=4468596;TYP=SUB;R1P=84;R1M=101;R2P=78;R2M=79;AD=342;DP=7978;MCOV=-41;PPC=340;AF=0.0429;RAF=0.0049;LS=38684;MQS=20520;MQM=60;BQS=12490;BQM=38;EDS=11804;EDM=75;IDS=338302;IDM=992;CED=601;HMP=1;SB=0.9998;EFF=SYNONYMOUS_CODING(LOW|SILENT|gtC/gtT|V324|898|mgtA|protein_coding|CODING|NP_418663.1|1|1)	GT:DP:AD:AF:RAF:SB:SC:PF	0	0	0	0	0	0	0	0	1	1	0	0	0.0051	0	0	0	0	0	0.0057	0
NC_000913.3	1377662	ycjS	NP_415831.1	G	A	56.4	PASS	SN=0;STA=1377661;STO=1377662;TYP=SUB;R1P=96;R1M=101;R2P=104;R2M=72;AD=373;DP=8705;MCOV=-41;PPC=372;AF=0.0428;RAF=0.0047;LS=42193;MQS=22380;MQM=60;BQS=13382;BQM=39;EDS=12641;EDM=74;IDS=365981;IDM=992;CED=601;HMP=0;SB=0.9997;EFF=SYNONYMOUS_CODING(LOW|SILENT|acG/acA|T277|351|ycjS|protein_coding|CODING|NP_415831.1|1|1|WARNING_TRANSCRIPT_NO_START_CODON)	GT:DP:AD:AF:RAF:SB:SC:PF	0	0	0	0	0	0	0	0	0.9951	1	0	0	0	0	0	0	0	0	0	0
NC_000913.3	476552	0	0	G	A	57.34	PASS	SN=0;STA=476551;STO=476552;TYP=SUB;R1P=83;R1M=70;R2P=61;R2M=84;AD=298;DP=7347;MCOV=-41;PPC=296;AF=0.0406;RAF=0.0045;LS=33828;MQS=17880;MQM=60;BQS=10632;BQM=38;EDS=9819;EDM=75;IDS=294489;IDM=992;CED=601;HMP=0;SB=0.9999;EFF=INTERGENIC(MODIFIER||||||||||1)	GT:DP:AD:AF:RAF:SB:SC:PF	0	0	0	0.0062	0	0.0063	0	0	0.9938	1	0	0	0	0	0	0.0071	0.0052	0	0	0
NC_000913.3	1925493	yobB	NP_416357.1	C	T	58.6	PASS	SN=0;STA=1925492;STO=1925493;TYP=SUB;R1P=52;R1M=28;R2P=56;R2M=49;AD=185;DP=9410;MCOV=-41;PPC=185;AF=0.0197;RAF=0.0045;LS=25834;MQS=11100;MQM=60;BQS=7026;BQM=39;EDS=7732;EDM=74;IDS=183317;IDM=992;CED=601;HMP=1;SB=0.9994;EFF=SYNONYMOUS_CODING(LOW|SILENT|ctC/ctT|L18|218|yobB|protein_coding|CODING|NP_416357.1|1|1)	GT:DP:AD:AF:RAF:SB:SC:PF	0	0	0	0	0	0	0	0	0	1	0.0042	0	0	0	0	0	0	0.0038	0.004	0
NC_000913.3	3753753	yiaV	NP_418043.1	T	C	57.84	PASS	SN=0;STA=3753752;STO=3753753;TYP=SUB;R1P=97;R1M=76;R2P=108;R2M=84;AD=365;DP=8495;MCOV=-41;PPC=362;AF=0.0430;RAF=0.0045;LS=40508;MQS=21900;MQM=60;BQS=13248;BQM=39;EDS=12081;EDM=75;IDS=360693;IDM=992;CED=601;HMP=0;SB=0.9996;EFF=NON_SYNONYMOUS_CODING(MODERATE|MISSENSE|aAa/aGa|K116R|378|yiaV|protein_coding|CODING|NP_418043.1|1|1)	GT:DP:AD:AF:RAF:SB:SC:PF	0	0	0	0	0	0	0.0051	0	0.9952	1	0.0051	0	0	0	0	0	0	0	0	0
NC_000913.3	1241971	cvrA	NP_415709.2	A	G	58	PASS	SN=0;STA=1241970;STO=1241971;TYP=SUB;R1P=41;R1M=48;R2P=35;R2M=41;AD=165;DP=10084;MCOV=-41;PPC=164;AF=0.0164;RAF=0.0044;LS=23084;MQS=9900;MQM=60;BQS=6168;BQM=39;EDS=6797;EDM=74;IDS=163252;IDM=992;CED=601;HMP=0;SB=0.9997;EFF=NON_SYNONYMOUS_CODING(MODERATE|MISSENSE|aTt/aCt|I34T|578|cvrA|protein_coding|CODING|NP_415709.2|1|1)	GT:DP:AD:AF:RAF:SB:SC:PF	0	0	0	0	0	0	0	0	0.0041	1	0	0	0	0	0	0	0	0	0	0
NC_000913.3	3352530	arcB	YP_026207.1	C	A	58.35	PASS	SN=0;STA=3352529;STO=3352530;TYP=SUB;R1P=106;R1M=118;R2P=112;R2M=96;AD=432;DP=9018;MCOV=-41;PPC=427;AF=0.0479;RAF=0.0043;LS=48211;MQS=25920;MQM=60;BQS=15717;BQM=39;EDS=13957;EDM=75;IDS=427133;IDM=992;CED=601;HMP=0;SB=1.0000;EFF=NON_SYNONYMOUS_CODING(MODERATE|MISSENSE|Gac/Tac|D166Y|778|arcB|protein_coding|CODING|YP_026207.1|1|1)	GT:DP:AD:AF:RAF:SB:SC:PF	0	0.0043	0.004	0.0044	0	0	0	0	0.9959	1	0	0	0	0	0	0	0.01	0	0	0
NC_000913.3	1832463	xthA	NP_416263.1	C	A	58	PASS	SN=0;STA=1832462;STO=1832463;TYP=SUB;R1P=119;R1M=108;R2P=110;R2M=120;AD=457;DP=10114;MCOV=-41;PPC=455;AF=0.0452;RAF=0.0040;LS=50627;MQS=27420;MQM=60;BQS=16596;BQM=39;EDS=14320;EDM=74;IDS=451874;IDM=992;CED=601;HMP=0;SB=1.0000;EFF=SYNONYMOUS_CODING(LOW|SILENT|cgC/cgA|R12|268|xthA|protein_coding|CODING|NP_416263.1|1|1)	GT:DP:AD:AF:RAF:SB:SC:PF	0	0	0	0	0.0038	0	0	0	1	1	0.0037	0	0.004	0	0.0032	0	0	0.0039	0	0
NC_000913.3	3418976	0	0	C	A	58.21	PASS	SN=0;STA=3418975;STO=3418976;TYP=SUB;R1P=98;R1M=123;R2P=105;R2M=106;AD=432;DP=9884;MCOV=-41;PPC=431;AF=0.0437;RAF=0.0040;LS=46621;MQS=25920;MQM=60;BQS=16247;BQM=39;EDS=14033;EDM=75;IDS=427145;IDM=992;CED=601;HMP=1;SB=0.9998;EFF=INTERGENIC(MODIFIER||||||||||1)	GT:DP:AD:AF:RAF:SB:SC:PF	0	0.0036	0.0074	0	0	0.0038	0	0	1	1	0	0.004	0	0.0039	0	0	0.0039	0	0	0
NC_000913.3	3574842	asd	NP_417891.1	C	T	56.99	PASS	SN=0;STA=3574841;STO=3574842;TYP=SUB;R1P=103;R1M=116;R2P=98;R2M=96;AD=413;DP=9528;MCOV=-41;PPC=410;AF=0.0433;RAF=0.0040;LS=44860;MQS=24780;MQM=60;BQS=14811;BQM=39;EDS=13223;EDM=75;IDS=404196;IDM=992;CED=601;HMP=0;SB=0.9999;EFF=NON_SYNONYMOUS_CODING(MODERATE|MISSENSE|Gtc/Atc|V13I|367|asd|protein_coding|CODING|NP_417891.1|1|1)	GT:DP:AD:AF:RAF:SB:SC:PF	0	0	0.0038	0	0	0	0	0	1	1	0	0	0	0	0	0	0.0042	0	0	0
NC_000913.3	3133762	yghS	NP_417459.1	T	A	44.53	PASS	SN=0;STA=3133761;STO=3133762;TYP=SUB;R1P=110;R1M=80;R2P=126;R2M=90;AD=406;DP=10110;MCOV=-41;PPC=400;AF=0.0402;RAF=0.0039;LS=44222;MQS=24360;MQM=60;BQS=15100;BQM=39;EDS=13320;EDM=75;IDS=397368;IDM=989;CED=601;HMP=5;SB=0.9994;EFF=NON_SYNONYMOUS_CODING(MODERATE|MISSENSE|Att/Ttt|I66F|237|yghS|protein_coding|CODING|NP_417459.1|1|1|WARNING_TRANSCRIPT_NO_START_CODON)	GT:DP:AD:AF:RAF:SB:SC:PF	0.0039	0	0	0	0	0	0	0	1	1	0	0	0	0	0	0.0125	0	0	0	0
NC_000913.3	2626332	ppx	NP_416997.1	G	T	58.01	PASS	SN=0;STA=2626331;STO=2626332;TYP=SUB;R1P=112;R1M=78;R2P=91;R2M=98;AD=379;DP=9583;MCOV=-41;PPC=376;AF=0.0395;RAF=0.0039;LS=42465;MQS=22740;MQM=60;BQS=13953;BQM=39;EDS=12563;EDM=75;IDS=374578;IDM=992;CED=601;HMP=0;SB=0.9997;EFF=SYNONYMOUS_CODING(LOW|SILENT|gcG/gcT|A406|513|ppx|protein_coding|CODING|NP_416997.1|1|1)	GT:DP:AD:AF:RAF:SB:SC:PF	0	0	0.0043	0	0	0	0	0	1	1	0	0	0	0	0	0.0063	0	0.0044	0	0
NC_000913.3	1161155	fhuE	NP_415620.1	C	T	58.88	PASS	SN=0;STA=1161154;STO=1161155;TYP=SUB;R1P=126;R1M=94;R2P=116;R2M=103;AD=439;DP=9883;MCOV=-41;PPC=434;AF=0.0444;RAF=0.0039;LS=49594;MQS=26340;MQM=60;BQS=16478;BQM=39;EDS=14240;EDM=75;IDS=434081;IDM=992;CED=601;HMP=1;SB=0.9996;EFF=NON_SYNONYMOUS_CODING(MODERATE|MISSENSE|Gat/Aat|D133N|729|fhuE|protein_coding|CODING|NP_415620.1|1|1)	GT:DP:AD:AF:RAF:SB:SC:PF	0	0	0	0	0	0	0	0	1	1	0	0	0	0	0	0.006	0	0	0	0
NC_000913.3	3073830	0	0	A	G	51.15	PASS	SN=0;STA=3073829;STO=3073830;TYP=SUB;R1P=122;R1M=133;R2P=120;R2M=121;AD=496;DP=10861;MCOV=-41;PPC=492;AF=0.0457;RAF=0.0039;LS=54870;MQS=29760;MQM=60;BQS=18353;BQM=39;EDS=16178;EDM=74;IDS=490289;IDM=992;CED=601;HMP=2;SB=0.9999;EFF=INTERGENIC(MODIFIER||||||||||1)	GT:DP:AD:AF:RAF:SB:SC:PF	0	0	0.0036	0.0031	0	0	0	0	0.9899	1	0	0	0	0	0	0	0	0	0	0
NC_000913.3	259193	phoE	NP_414776.1	A	G	57.66	PASS	SN=0;STA=259192;STO=259193;TYP=SUB;R1P=129;R1M=98;R2P=112;R2M=81;AD=420;DP=10932;MCOV=-41;PPC=392;AF=0.0384;RAF=0.0037;LS=45235;MQS=25200;MQM=60;BQS=15218;BQM=39;EDS=13206;EDM=74;IDS=415064;IDM=992;CED=601;HMP=1;SB=0.9995;EFF=NON_SYNONYMOUS_CODING(MODERATE|MISSENSE|gTc/gCc|V303A|351|phoE|protein_coding|CODING|NP_414776.1|1|1)	GT:DP:AD:AF:RAF:SB:SC:PF	0	0	0.0036	0	0	0	0	0	0.9891	1	0	0.0038	0	0	0	0	0	0	0	0
NC_000913.3	3455839	gspC	NP_417783.1	A	T	57.82	PASS	SN=0;STA=3455838;STO=3455839;TYP=SUB;R1P=117;R1M=154;R2P=121;R2M=140;AD=532;DP=12237;MCOV=-41;PPC=528;AF=0.0435;RAF=0.0035;LS=56596;MQS=31920;MQM=60;BQS=19760;BQM=39;EDS=16365;EDM=75;IDS=525595;IDM=992;CED=601;HMP=1;SB=0.9996;EFF=STOP_GAINED(HIGH|NONSENSE|Aag/Tag|K88*|271|gspC|protein_coding|CODING|NP_417783.1|1|1|WARNING_TRANSCRIPT_NO_START_CODON)	GT:DP:AD:AF:RAF:SB:SC:PF	0	0	0	0	0	0	0	0	1	1	0	0	0	0	0	0	0	0	0	0
NC_000913.3	180299	dgt	NP_414702.1	A	T	58.44	PASS	SN=0;STA=180298;STO=180299;TYP=SUB;R1P=36;R1M=46;R2P=41;R2M=50;AD=173;DP=11885;MCOV=-41;PPC=173;AF=0.0146;RAF=0.0033;LS=24243;MQS=10380;MQM=60;BQS=6569;BQM=39;EDS=7025;EDM=74;IDS=171401;IDM=992;CED=601;HMP=1;SB=0.9996;EFF=NON_SYNONYMOUS_CODING(MODERATE|MISSENSE|Aat/Tat|N355Y|505|dgt|protein_coding|CODING|NP_414702.1|1|1)	GT:DP:AD:AF:RAF:SB:SC:PF	0	0	0	0	0	0	0	0	0	1	0	0	0.003	0	0	0	0	0	0	0.0033
NC_000913.3	1005361	pyrD	NP_415465.1	A	G	58.21	PASS	SN=0;STA=1005360;STO=1005361;TYP=SUB;R1P=36;R1M=42;R2P=40;R2M=44;AD=162;DP=11348;MCOV=-41;PPC=160;AF=0.0143;RAF=0.0033;LS=22685;MQS=9720;MQM=60;BQS=6107;BQM=39;EDS=6551;EDM=75;IDS=160540;IDM=992;CED=601;HMP=0;SB=0.9998;EFF=SYNONYMOUS_CODING(LOW|SILENT|aaA/aaG|K198|336|pyrD|protein_coding|CODING|NP_415465.1|1|1)	GT:DP:AD:AF:RAF:SB:SC:PF	0	0	0	0	0.0033	0	0	0	0	1	0	0	0	0	0	0	0	0	0	0
NC_000913.3	1490026	gapC	b4493	C	T	57.26	PASS	SN=0;STA=1490025;STO=1490026;TYP=SUB;R1P=511;R1M=539;R2P=560;R2M=571;AD=2181;DP=5015;MCOV=-41;PPC=2169;AF=0.4349;RAF=0.0000;LS=207014;MQS=130860;MQM=60;BQS=80231;BQM=39;EDS=60574;EDM=75;IDS=2132934;IDM=992;CED=601;HMP=0;SB=0.9999;EFF=NON_SYNONYMOUS_CODING(MODERATE|MISSENSE|Gcg/Acg|A230T|332|gapC|protein_coding|CODING|b4493|1|1|WARNING_TRANSCRIPT_INCOMPLETE)	GT:DP:AD:AF:RAF:SB:SC:PF	0	0	0	0	0	0	1	0	0	1	0.008	0	0	0	0	1	1	1	0.9953	1
NC_000913.3	1490031	gapC	b4493	C	T	57.59	PASS	SN=0;STA=1490030;STO=1490031;TYP=SUB;R1P=506;R1M=533;R2P=548;R2M=573;AD=2160;DP=4996;MCOV=-41;PPC=2150;AF=0.4323;RAF=0.0000;LS=204881;MQS=129600;MQM=60;BQS=79399;BQM=39;EDS=60514;EDM=75;IDS=2112228;IDM=992;CED=601;HMP=0;SB=0.9999;EFF=NON_SYNONYMOUS_CODING(MODERATE|MISSENSE|gGt/gAt|G228D|332|gapC|protein_coding|CODING|b4493|1|1|WARNING_TRANSCRIPT_INCOMPLETE)	GT:DP:AD:AF:RAF:SB:SC:PF	0	0	0	0	0	0	1	0	0	1	0.004	0	0	0	0	1	1	1	0.9952	1
NC_000913.3	431075	0	0	G	T	58.03	PASS	SN=0;STA=431074;STO=431075;TYP=SUB;R1P=124;R1M=121;R2P=125;R2M=137;AD=507;DP=11664;MCOV=-41;PPC=503;AF=0.0435;RAF=0.0000;LS=54407;MQS=30420;MQM=60;BQS=18550;BQM=39;EDS=15541;EDM=75;IDS=501121;IDM=992;CED=601;HMP=0;SB=0.9999;EFF=INTERGENIC(MODIFIER||||||||||1)	GT:DP:AD:AF:RAF:SB:SC:PF	0	0	0.0032	0	0	0	0	0	1	1	0	0	0	0.0031	0.0067	0.014	0	0	0	0.003
NC_000913.3	3430608	aroE	NP_417740.1	T	C	57.88	PASS	SN=0;STA=3430607;STO=3430608;TYP=SUB;R1P=94;R1M=78;R2P=90;R2M=92;AD=354;DP=8514;MCOV=-41;PPC=346;AF=0.0416;RAF=0.0000;LS=39543;MQS=21206;MQM=60;BQS=12953;BQM=39;EDS=11470;EDM=75;IDS=349644;IDM=992;CED=601;HMP=0;SB=0.9998;EFF=SYNONYMOUS_CODING(LOW|SILENT|gaA/gaG|E77|272|aroE|protein_coding|CODING|NP_417740.1|1|1)	GT:DP:AD:AF:RAF:SB:SC:PF	0	0	0	0.0044	0.0045	0	0	0	0.995	1	0	0	0	0	0	0.0123	0	0	0	0
NC_000913.3	3522709	hofM	NP_417854.4	G	A	58.07	PASS	SN=0;STA=3522708;STO=3522709;TYP=SUB;R1P=125;R1M=98;R2P=101;R2M=102;AD=426;DP=9772;MCOV=-41;PPC=423;AF=0.0436;RAF=0.0000;LS=47632;MQS=25560;MQM=60;BQS=15619;BQM=40;EDS=14181;EDM=75;IDS=420961;IDM=992;CED=601;HMP=0;SB=0.9998;EFF=STOP_GAINED(HIGH|NONSENSE|Caa/Taa|Q15*|259|hofM|protein_coding|CODING|NP_417854.4|1|1)	GT:DP:AD:AF:RAF:SB:SC:PF	0	0	0.0038	0	0	0	0	0	1	1	0	0	0	0	0	0.0118	0	0	0	0
NC_000913.3	936874	ftsK	NP_415410.1	C	T	57.91	PASS	SN=0;STA=936873;STO=936874;TYP=SUB;R1P=103;R1M=87;R2P=86;R2M=87;AD=363;DP=8112;MCOV=-41;PPC=355;AF=0.0447;RAF=0.0000;LS=40361;MQS=21765;MQM=60;BQS=13353;BQM=39;EDS=12132;EDM=74;IDS=358841;IDM=992;CED=601;HMP=1;SB=0.9998;EFF=SYNONYMOUS_CODING(LOW|SILENT|gtC/gtT|V1217|1329|ftsK|protein_coding|CODING|NP_415410.1|1|1)	GT:DP:AD:AF:RAF:SB:SC:PF	0	0	0.0119	0	0	0	0	0	1	1	0	0	0	0	0	0.008	0	0	0	0.006
NC_000913.3	1963630	flhA	NP_416393.1	G	A	57.97	PASS	SN=0;STA=1963629;STO=1963630;TYP=SUB;R1P=88;R1M=110;R2P=79;R2M=88;AD=365;DP=7214;MCOV=-41;PPC=359;AF=0.0506;RAF=0.0000;LS=41554;MQS=21893;MQM=60;BQS=13447;BQM=39;EDS=12148;EDM=74;IDS=358008;IDM=992;CED=601;HMP=0;SB=0.9997;EFF=NON_SYNONYMOUS_CODING(MODERATE|MISSENSE|gCg/gTg|A474V|692|flhA|protein_coding|CODING|NP_416393.1|1|1)	GT:DP:AD:AF:RAF:SB:SC:PF	0	0	0	0	0	0	0	0	0.9948	1	0	0	0	0	0	0.0075	0.0052	0	0	0.006
NC_000913.3	538341	ybbW	NP_415044.4	G	A	56.51	PASS	SN=0;STA=538340;STO=538341;TYP=SUB;R1P=78;R1M=46;R2P=88;R2M=73;AD=285;DP=6400;MCOV=-41;PPC=277;AF=0.0445;RAF=0.0000;LS=31984;MQS=17100;MQM=60;BQS=10293;BQM=38;EDS=9408;EDM=75;IDS=280764;IDM=992;CED=601;HMP=1;SB=0.9994;EFF=NON_SYNONYMOUS_CODING(MODERATE|MISSENSE|Gtt/Att|V237I|484|ybbW|protein_coding|CODING|NP_415044.4|1|1)	GT:DP:AD:AF:RAF:SB:SC:PF	0	0	0	0	0	0	0	0	1	1	0	0	0	0	0	0.0074	0	0	0	0
NC_000913.3	1183102	potC	NP_415642.1	C	A	57.6	PASS	SN=0;STA=1183101;STO=1183102;TYP=SUB;R1P=76;R1M=83;R2P=86;R2M=88;AD=333;DP=8274;MCOV=-41;PPC=330;AF=0.0402;RAF=0.0000;LS=37432;MQS=19980;MQM=60;BQS=11981;BQM=39;EDS=10537;EDM=75;IDS=328919;IDM=992;CED=601;HMP=1;SB=0.9999;EFF=SYNONYMOUS_CODING(LOW|SILENT|ctG/ctT|L173|264|potC|protein_coding|CODING|NP_415642.1|1|1)	GT:DP:AD:AF:RAF:SB:SC:PF	0	0	0	0	0.0055	0.0048	0	0	1	1	0.0121	0	0.0124	0.0046	0	0.0074	0	0	0.0051	0
NC_000913.3	2393617	nuoL	NP_416781.1	C	T	57.74	PASS	SN=0;STA=2393616;STO=2393617;TYP=SUB;R1P=63;R1M=87;R2P=76;R2M=52;AD=278;DP=5241;MCOV=-41;PPC=278;AF=0.0530;RAF=0.0000;LS=32444;MQS=16680;MQM=60;BQS=10244;BQM=39;EDS=9565;EDM=75;IDS=274845;IDM=992;CED=601;HMP=0;SB=1.0000;EFF=NON_SYNONYMOUS_CODING(MODERATE|MISSENSE|gGc/gAc|G477D|613|nuoL|protein_coding|CODING|NP_416781.1|1|1)	GT:DP:AD:AF:RAF:SB:SC:PF	0	0	0	0	0	0	0	0	1	1	0	0	0	0	0	0.0074	0	0	0	0
NC_000913.3	1663789	ynfH	NP_416107.1	T	C	46.64	PASS	SN=0;STA=1663788;STO=1663789;TYP=SUB;R1P=108;R1M=81;R2P=98;R2M=93;AD=380;DP=8170;MCOV=-41;PPC=376;AF=0.0465;RAF=0.0000;LS=43256;MQS=22800;MQM=60;BQS=13787;BQM=39;EDS=12560;EDM=75;IDS=375785;IDM=992;CED=601;HMP=4;SB=0.9997;EFF=NON_SYNONYMOUS_CODING(MODERATE|MISSENSE|Tct/Cct|S61P|284|ynfH|protein_coding|CODING|NP_416107.1|1|1)	GT:DP:AD:AF:RAF:SB:SC:PF	0	0.0056	0.0061	0.0051	0	0	0	0	0.995	1	0	0	0	0	0	0.0072	0	0	0	0
NC_000913.3	2454481	yfcU	b4661	G	A	57.66	PASS	SN=0;STA=2454480;STO=2454481;TYP=SUB;R1P=114;R1M=84;R2P=108;R2M=97;AD=403;DP=9059;MCOV=-41;PPC=399;AF=0.0445;RAF=0.0000;LS=43164;MQS=24165;MQM=60;BQS=14886;BQM=39;EDS=13037;EDM=75;IDS=398233;IDM=992;CED=601;HMP=0;SB=0.9996;EFF=NON_SYNONYMOUS_CODING(MODERATE|MISSENSE|gCg/gTg|A174V|881|yfcU|protein_coding|CODING|b4661|1|1)	GT:DP:AD:AF:RAF:SB:SC:PF	0	0	0.0041	0	0	0	0	0	1	1	0	0	0	0	0	0.0072	0	0	0	0
NC_000913.3	3884469	rpmH	NP_418158.1	C	A	58.21	PASS	SN=0;STA=3884468;STO=3884469;TYP=SUB;R1P=91;R1M=117;R2P=76;R2M=116;AD=400;DP=8617;MCOV=-41;PPC=399;AF=0.0464;RAF=0.0000;LS=44550;MQS=24000;MQM=60;BQS=14867;BQM=39;EDS=13197;EDM=75;IDS=395520;IDM=992;CED=601;HMP=0;SB=0.9994;EFF=NON_SYNONYMOUS_CODING(MODERATE|MISSENSE|tCt/tAt|S45Y|46|rpmH|protein_coding|CODING|NP_418158.1|1|1)	GT:DP:AD:AF:RAF:SB:SC:PF	0.0042	0	0.0046	0	0.0044	0	0.0046	0	0.9957	1	0	0.0046	0	0	0	0.0072	0.005	0.0046	0	0
NC_000913.3	248194	0	0	G	T	50.35	PASS	SN=0;STA=248193;STO=248194;TYP=SUB;R1P=24;R1M=21;R2P=14;R2M=22;AD=81;DP=8397;MCOV=-41;PPC=81;AF=0.0096;RAF=0.0000;LS=9511;MQS=4384;MQM=60;BQS=2982;BQM=39;EDS=2050;EDM=53;IDS=78107;IDM=989;CED=601;HMP=0;SB=0.9998;EFF=INTERGENIC(MODIFIER||||||||||1)	GT:DP:AD:AF:RAF:SB:SC:PF	0	0	0	0.0044	0	0.0052	0.0093	0	1	1	0	0	0	0.0047	0	0.0068	0.0048	0.005	0	0
NC_000913.3	740031	phr	NP_415236.1	T	C	57.87	PASS	SN=0;STA=740030;STO=740031;TYP=SUB;R1P=76;R1M=113;R2P=87;R2M=78;AD=354;DP=8535;MCOV=-41;PPC=351;AF=0.0415;RAF=0.0000;LS=39149;MQS=21240;MQM=60;BQS=12795;BQM=39;EDS=11774;EDM=75;IDS=350039;IDM=992;CED=601;HMP=1;SB=0.9997;EFF=SYNONYMOUS_CODING(LOW|SILENT|gtT/gtC|V175|472|phr|protein_coding|CODING|NP_415236.1|1|1)	GT:DP:AD:AF:RAF:SB:SC:PF	0	0	0	0	0	0	0	0	0.9953	1	0	0	0	0	0	0.0068	0	0	0	0
NC_000913.3	1112755	opgH	NP_415567.1	C	T	57.74	PASS	SN=0;STA=1112754;STO=1112755;TYP=SUB;R1P=48;R1M=30;R2P=45;R2M=34;AD=157;DP=7480;MCOV=-41;PPC=157;AF=0.0210;RAF=0.0000;LS=22087;MQS=9420;MQM=60;BQS=5795;BQM=39;EDS=6027;EDM=75;IDS=155562;IDM=992;CED=601;HMP=0;SB=0.9994;EFF=SYNONYMOUS_CODING(LOW|SILENT|agC/agT|S631|847|opgH|protein_coding|CODING|NP_415567.1|1|1)	GT:DP:AD:AF:RAF:SB:SC:PF	0	0	0	0	0	0	0	0	0	1	0	0	0	0	0	0.0068	0	0	0	0
NC_000913.3	1151146	fabG	NP_415611.1	C	T	58.08	PASS	SN=0;STA=1151145;STO=1151146;TYP=SUB;R1P=94;R1M=84;R2P=92;R2M=99;AD=369;DP=8505;MCOV=-41;PPC=367;AF=0.0434;RAF=0.0000;LS=41360;MQS=22140;MQM=60;BQS=13749;BQM=39;EDS=12369;EDM=75;IDS=364631;IDM=992;CED=601;HMP=1;SB=1.0000;EFF=SYNONYMOUS_CODING(LOW|SILENT|atC/atT|I159|244|fabG|protein_coding|CODING|NP_415611.1|1|1)	GT:DP:AD:AF:RAF:SB:SC:PF	0	0	0	0	0	0	0.0049	0	0.9906	1	0	0	0	0	0	0.0068	0	0	0	0
NC_000913.3	1788207	ppsR	NP_416218.1	A	G	57.86	PASS	SN=0;STA=1788206;STO=1788207;TYP=SUB;R1P=89;R1M=84;R2P=76;R2M=93;AD=342;DP=8730;MCOV=-41;PPC=341;AF=0.0392;RAF=0.0000;LS=38370;MQS=20520;MQM=60;BQS=12616;BQM=39;EDS=11390;EDM=74;IDS=338155;IDM=992;CED=601;HMP=0;SB=0.9999;EFF=NON_SYNONYMOUS_CODING(MODERATE|MISSENSE|Acc/Gcc|T255A|277|ppsR|protein_coding|CODING|NP_416218.1|1|1)	GT:DP:AD:AF:RAF:SB:SC:PF	0	0	0	0	0	0.0046	0.0089	0	1	1	0	0	0	0	0	0.0068	0	0	0.0044	0
NC_000913.3	3091104	0	0	C	A	58.41	PASS	SN=0;STA=3091103;STO=3091104;TYP=SUB;R1P=99;R1M=95;R2P=109;R2M=98;AD=401;DP=8898;MCOV=-41;PPC=399;AF=0.0451;RAF=0.0000;LS=45716;MQS=24060;MQM=60;BQS=14632;BQM=39;EDS=13875;EDM=75;IDS=396337;IDM=992;CED=601;HMP=0;SB=0.9999;EFF=INTERGENIC(MODIFIER||||||||||1)	GT:DP:AD:AF:RAF:SB:SC:PF	0	0	0.0051	0.0045	0.0094	0	0	0	0.9951	1	0.0099	0	0	0.0047	0	0.0068	0.0045	0	0.0041	0
NC_000913.3	1976221	motB	NP_416403.1	T	G	57.94	PASS	SN=0;STA=1976220;STO=1976221;TYP=SUB;R1P=97;R1M=90;R2P=90;R2M=83;AD=360;DP=8718;MCOV=-41;PPC=360;AF=0.0413;RAF=0.0000;LS=40551;MQS=21600;MQM=60;BQS=13103;BQM=38;EDS=12312;EDM=75;IDS=355989;IDM=992;CED=601;HMP=0;SB=0.9999;EFF=NON_SYNONYMOUS_CODING(MODERATE|MISSENSE|aAa/aCa|K12T|308|motB|protein_coding|CODING|NP_416403.1|1|1)	GT:DP:AD:AF:RAF:SB:SC:PF	0	0	0	0	0	0	0	0	0.9851	1	0	0	0	0	0	0.0067	0.0049	0	0	0
NC_000913.3	2219999	bglX	NP_416636.1	T	A	58.1	PASS	SN=0;STA=2219998;STO=2219999;TYP=SUB;R1P=79;R1M=109;R2P=60;R2M=126;AD=374;DP=8150;MCOV=-41;PPC=368;AF=0.0459;RAF=0.0000;LS=42545;MQS=22440;MQM=60;BQS=13828;BQM=39;EDS=12689;EDM=74;IDS=369855;IDM=992;CED=601;HMP=0;SB=0.9992;EFF=NON_SYNONYMOUS_CODING(MODERATE|MISSENSE|aAg/aTg|K664M|765|bglX|protein_coding|CODING|NP_416636.1|1|1)	GT:DP:AD:AF:RAF:SB:SC:PF	0	0	0	0	0	0	0	0	0.9901	1	0	0	0	0	0	0.0067	0	0	0	0
NC_000913.3	248197	0	0	T	A	49.43	PASS	SN=0;STA=248196;STO=248197;TYP=SUB;R1P=22;R1M=16;R2P=16;R2M=18;AD=72;DP=8332;MCOV=-41;PPC=72;AF=0.0086;RAF=0.0000;LS=8608;MQS=3844;MQM=60;BQS=2545;BQM=39;EDS=1866;EDM=65;IDS=69107;IDM=989;CED=601;HMP=1;SB=0.9998;EFF=INTERGENIC(MODIFIER||||||||||1)	GT:DP:AD:AF:RAF:SB:SC:PF	0	0	0.0047	0	0	0	0	0	1	1	0	0	0	0.0046	0.0052	0.0066	0.0048	0	0	0
NC_000913.3	72978	thiP	NP_414609.1	A	G	57.84	PASS	SN=0;STA=72977;STO=72978;TYP=SUB;R1P=47;R1M=38;R2P=53;R2M=29;AD=167;DP=7922;MCOV=-41;PPC=166;AF=0.0211;RAF=0.0000;LS=23385;MQS=10020;MQM=60;BQS=6148;BQM=39;EDS=6625;EDM=75;IDS=165530;IDM=992;CED=601;HMP=1;SB=0.9993;EFF=NON_SYNONYMOUS_CODING(MODERATE|MISSENSE|cTg/cCg|L515P|536|thiP|protein_coding|CODING|NP_414609.1|1|1)	GT:DP:AD:AF:RAF:SB:SC:PF	0	0	0	0	0	0	0	0	0	1	0	0	0	0	0	0.0065	0	0	0	0
NC_000913.3	1613087	glsB	NP_416041.1	G	A	57.4	PASS	SN=0;STA=1613086;STO=1613087;TYP=SUB;R1P=86;R1M=106;R2P=97;R2M=93;AD=382;DP=9980;MCOV=-41;PPC=377;AF=0.0383;RAF=0.0000;LS=42566;MQS=22920;MQM=60;BQS=14190;BQM=39;EDS=12171;EDM=74;IDS=374363;IDM=992;CED=601;HMP=0;SB=0.9998;EFF=SYNONYMOUS_CODING(LOW|SILENT|gcC/gcT|A55|308|glsB|protein_coding|CODING|NP_416041.1|1|1|WARNING_TRANSCRIPT_NO_START_CODON)	GT:DP:AD:AF:RAF:SB:SC:PF	0	0	0	0	0	0	0	0	1	1	0	0	0	0	0	0.0064	0.0102	0	0	0
NC_000913.3	717731	potE	NP_415219.1	C	A	50.96	PASS	SN=0;STA=717730;STO=717731;TYP=SUB;R1P=97;R1M=77;R2P=86;R2M=91;AD=351;DP=8170;MCOV=-41;PPC=349;AF=0.0430;RAF=0.0000;LS=39510;MQS=21060;MQM=60;BQS=12989;BQM=39;EDS=11758;EDM=74;IDS=346882;IDM=992;CED=601;HMP=2;SB=0.9998;EFF=NON_SYNONYMOUS_CODING(MODERATE|MISSENSE|Gat/Tat|D179Y|439|potE|protein_coding|CODING|NP_415219.1|1|1)	GT:DP:AD:AF:RAF:SB:SC:PF	0	0.0051	0.0053	0	0.0047	0	0	0	1	1	0.0056	0	0	0	0.0049	0.0063	0	0	0	0
NC_000913.3	4145216	pflD	NP_418386.1	C	A	57.81	PASS	SN=0;STA=4145215;STO=4145216;TYP=SUB;R1P=98;R1M=110;R2P=89;R2M=98;AD=395;DP=8671;MCOV=-41;PPC=392;AF=0.0456;RAF=0.0000;LS=44432;MQS=23700;MQM=60;BQS=14143;BQM=39;EDS=12665;EDM=75;IDS=390171;IDM=992;CED=601;HMP=0;SB=0.9998;EFF=NON_SYNONYMOUS_CODING(MODERATE|MISSENSE|Ctg/Atg|L408M|765|pflD|protein_coding|CODING|NP_418386.1|1|1)	GT:DP:AD:AF:RAF:SB:SC:PF	0	0.0042	0.0051	0	0	0	0	0	1	1	0	0	0	0.0047	0	0.0063	0	0	0	0
NC_000913.3	240085	yafV	NP_414754.1	G	T	57.44	PASS	SN=0;STA=240084;STO=240085;TYP=SUB;R1P=66;R1M=96;R2P=97;R2M=87;AD=346;DP=8105;MCOV=-41;PPC=341;AF=0.0427;RAF=0.0000;LS=39157;MQS=20760;MQM=60;BQS=12550;BQM=39;EDS=10407;EDM=75;IDS=342061;IDM=992;CED=601;HMP=0;SB=0.9998;EFF=SYNONYMOUS_CODING(LOW|SILENT|cgC/cgA|R35|256|yafV|protein_coding|CODING|NP_414754.1|1|1|WARNING_TRANSCRIPT_NO_START_CODON)	GT:DP:AD:AF:RAF:SB:SC:PF	0	0	0	0	0.0042	0	0	0	0.9948	1	0	0	0	0	0	0.0062	0	0	0	0
NC_000913.3	4004297	yigI	NP_418264.4	CG	C	46.48	PASS	SN=0;STA=4004297;STO=4004298;TYP=DEL;R1P=121;R1M=104;R2P=112;R2M=86;AD=423;DP=9736;MCOV=-41;PPC=421;AF=0.0434;RAF=0.0000;LS=46593;MQS=25380;MQM=60;BQS=15503;BQM=38;EDS=14100;EDM=74;IDS=418471;IDM=992;CED=601;HMP=4;SB=0.9996;EFF=FRAME_SHIFT(HIGH||cgc/|R134|155|yigI|protein_coding|CODING|NP_418264.4|1|1);LOF=(yigI|b3820|1|1.00)	GT:DP:AD:AF:RAF:SB:SC:PF	0	0	0.0042	0	0.0042	0	0	0	1	1	0	0	0	0	0	0.006	0.0042	0	0	0
NC_000913.3	4337775	adiY	NP_418540.1	T	C	57.76	PASS	SN=0;STA=4337774;STO=4337775;TYP=SUB;R1P=31;R1M=35;R2P=52;R2M=40;AD=158;DP=13976;MCOV=-41;PPC=158;AF=0.0113;RAF=0.0000;LS=22059;MQS=9468;MQM=60;BQS=5808;BQM=39;EDS=6007;EDM=74;IDS=156307;IDM=992;CED=601;HMP=0;SB=0.9998;EFF=NON_SYNONYMOUS_CODING(MODERATE|MISSENSE|aAc/aGc|N52S|253|adiY|protein_coding|CODING|NP_418540.1|1|1)	GT:DP:AD:AF:RAF:SB:SC:PF	0.0026	0.0023	0	0	0	0	0	0	0	1	0	0	0	0	0	0.006	0	0	0	0
NC_000913.3	595017	cusR	NP_415103.1	T	A	57.77	PASS	SN=0;STA=595016;STO=595017;TYP=SUB;R1P=95;R1M=91;R2P=101;R2M=87;AD=374;DP=8334;MCOV=-41;PPC=372;AF=0.0449;RAF=0.0000;LS=42231;MQS=22440;MQM=60;BQS=13373;BQM=39;EDS=12946;EDM=75;IDS=369864;IDM=992;CED=601;HMP=0;SB=0.9998;EFF=NON_SYNONYMOUS_CODING(MODERATE|MISSENSE|Acc/Tcc|T143S|227|cusR|protein_coding|CODING|NP_415103.1|1|1)	GT:DP:AD:AF:RAF:SB:SC:PF	0	0.0045	0	0	0	0	0	0	0.9902	1	0	0	0	0	0.0049	0.0057	0	0	0	0
NC_000913.3	691330	ybeX	NP_415191.1	T	A	57.79	PASS	SN=0;STA=691329;STO=691330;TYP=SUB;R1P=100;R1M=106;R2P=112;R2M=116;AD=434;DP=9647;MCOV=-41;PPC=428;AF=0.0450;RAF=0.0000;LS=48254;MQS=26040;MQM=60;BQS=15822;BQM=38;EDS=13861;EDM=75;IDS=429052;IDM=992;CED=601;HMP=0;SB=0.9999;EFF=NON_SYNONYMOUS_CODING(MODERATE|MISSENSE|gAc/gTc|D152V|292|ybeX|protein_coding|CODING|NP_415191.1|1|1)	GT:DP:AD:AF:RAF:SB:SC:PF	0.0079	0	0.0043	0	0	0	0	0	0.996	1	0	0	0	0	0.004	0.0054	0	0	0	0
NC_000913.3	88947	cra	NP_414622.1	G	T	58.37	PASS	SN=0;STA=88946;STO=88947;TYP=SUB;R1P=97;R1M=83;R2P=111;R2M=95;AD=386;DP=8570;MCOV=-41;PPC=381;AF=0.0450;RAF=0.0000;LS=42898;MQS=23160;MQM=60;BQS=14247;BQM=39;EDS=12957;EDM=75;IDS=381865;IDM=992;CED=601;HMP=0;SB=0.9997;EFF=NON_SYNONYMOUS_CODING(MODERATE|MISSENSE|aGc/aTc|S307I|334|cra|protein_coding|CODING|NP_414622.1|1|1|WARNING_TRANSCRIPT_NO_START_CODON)	GT:DP:AD:AF:RAF:SB:SC:PF	0.0049	0	0	0	0	0	0	0	1	1	0	0	0	0	0	0	0	0.0048	0	0
NC_000913.3	89087	0	0	G	A	57.66	PASS	SN=0;STA=89086;STO=89087;TYP=SUB;R1P=123;R1M=120;R2P=121;R2M=116;AD=480;DP=10770;MCOV=-41;PPC=476;AF=0.0446;RAF=0.0000;LS=51721;MQS=28800;MQM=60;BQS=17474;BQM=39;EDS=14197;EDM=75;IDS=474796;IDM=992;CED=601;HMP=1;SB=0.9999;EFF=INTERGENIC(MODIFIER||||||||||1)	GT:DP:AD:AF:RAF:SB:SC:PF	0	0.0035	0	0	0	0	0	0	1	1	0	0.0036	0	0.0038	0	0	0	0	0	0
NC_000913.3	103420	ftsQ	NP_414635.1	C	T	58.08	PASS	SN=0;STA=103419;STO=103420;TYP=SUB;R1P=87;R1M=99;R2P=91;R2M=82;AD=359;DP=8248;MCOV=-41;PPC=357;AF=0.0435;RAF=0.0000;LS=40812;MQS=21540;MQM=60;BQS=13245;BQM=39;EDS=11730;EDM=75;IDS=355008;IDM=992;CED=601;HMP=0;SB=1.0000;EFF=NON_SYNONYMOUS_CODING(MODERATE|MISSENSE|aCc/aTc|T89I|276|ftsQ|protein_coding|CODING|NP_414635.1|1|1)	GT:DP:AD:AF:RAF:SB:SC:PF	0	0	0	0	0	0	0	0	1	1	0	0	0	0	0.005	0	0	0	0	0.0054
NC_000913.3	128158	lpd	NP_414658.1	A	T	48.28	PASS	SN=0;STA=128157;STO=128158;TYP=SUB;R1P=107;R1M=115;R2P=101;R2M=100;AD=423;DP=9548;MCOV=-41;PPC=422;AF=0.0443;RAF=0.0000;LS=47248;MQS=25380;MQM=60;BQS=15320;BQM=38;EDS=13473;EDM=75;IDS=418397;IDM=992;CED=601;HMP=3;SB=0.9999;EFF=NON_SYNONYMOUS_CODING(MODERATE|MISSENSE|Atc/Ttc|I83F|474|lpd|protein_coding|CODING|NP_414658.1|1|1)	GT:DP:AD:AF:RAF:SB:SC:PF	0.0047	0	0	0	0	0	0	0	1	1	0	0	0	0	0	0	0	0	0	0
NC_000913.3	134564	yacL	NP_414661.2	AG	A	46.63	PASS	SN=0;STA=134564;STO=134565;TYP=DEL;R1P=103;R1M=94;R2P=104;R2M=75;AD=376;DP=8321;MCOV=-41;PPC=376;AF=0.0452;RAF=0.0000;LS=42386;MQS=22560;MQM=60;BQS=13948;BQM=39;EDS=12453;EDM=75;IDS=371934;IDM=992;CED=601;HMP=4;SB=0.9996;EFF=FRAME_SHIFT(HIGH||ggg/|G60|120|yacL|protein_coding|CODING|NP_414661.2|1|1);LOF=(yacL|b0119|1|1.00)	GT:DP:AD:AF:RAF:SB:SC:PF	0	0	0	0	0	0	0	0	0.9953	1	0	0	0	0	0	0	0	0	0	0
NC_000913.3	141838	hpt	NP_414667.4	A	G	58.16	PASS	SN=0;STA=141837;STO=141838;TYP=SUB;R1P=101;R1M=96;R2P=99;R2M=99;AD=395;DP=10280;MCOV=-41;PPC=391;AF=0.0384;RAF=0.0000;LS=43750;MQS=23700;MQM=60;BQS=14565;BQM=39;EDS=13098;EDM=74;IDS=390699;IDM=992;CED=601;HMP=1;SB=1.0000;EFF=SYNONYMOUS_CODING(LOW|SILENT|gaA/gaG|E136|178|hpt|protein_coding|CODING|NP_414667.4|1|1)	GT:DP:AD:AF:RAF:SB:SC:PF	0	0	0	0	0	0.0036	0	0	0.9915	1	0	0	0	0	0	0	0	0	0	0
NC_000913.3	147343	yadD	NP_414674.1	G	T	57.92	PASS	SN=0;STA=147342;STO=147343;TYP=SUB;R1P=83;R1M=105;R2P=104;R2M=106;AD=398;DP=9069;MCOV=-41;PPC=397;AF=0.0439;RAF=0.0000;LS=43458;MQS=23880;MQM=60;BQS=14333;BQM=39;EDS=13020;EDM=73;IDS=393432;IDM=992;CED=601;HMP=0;SB=0.9998;EFF=NON_SYNONYMOUS_CODING(MODERATE|MISSENSE|Gcc/Tcc|A126S|300|yadD|protein_coding|CODING|NP_414674.1|1|1)	GT:DP:AD:AF:RAF:SB:SC:PF	0	0	0	0	0	0	0	0	0.996	1	0	0	0	0	0	0	0	0	0	0
NC_000913.3	153992	htrE	NP_414681.1	T	C	58.37	PASS	SN=0;STA=153991;STO=153992;TYP=SUB;R1P=160;R1M=150;R2P=138;R2M=125;AD=573;DP=12845;MCOV=-41;PPC=568;AF=0.0446;RAF=0.0000;LS=61193;MQS=34366;MQM=60;BQS=20930;BQM=39;EDS=18042;EDM=75;IDS=566221;IDM=992;CED=601;HMP=0;SB=0.9998;EFF=NON_SYNONYMOUS_CODING(MODERATE|MISSENSE|Act/Gct|T479A|865|htrE|protein_coding|CODING|NP_414681.1|1|1|WARNING_TRANSCRIPT_NO_START_CODON)	GT:DP:AD:AF:RAF:SB:SC:PF	0.0052	0	0.0052	0	0.0026	0.0076	0	0	0.9974	1	0	0	0	0	0	0	0	0	0.0031	0
NC_000913.3	248205	0	0	C	A	45.87	PASS	SN=0;STA=248204;STO=248205;TYP=SUB;R1P=18;R1M=12;R2P=14;R2M=13;AD=57;DP=8374;MCOV=-41;PPC=57;AF=0.0068;RAF=0.0000;LS=6987;MQS=2970;MQM=60;BQS=1907;BQM=39;EDS=1376;EDM=49;IDS=54687;IDM=989;CED=601;HMP=0;SB=0.9996;EFF=INTERGENIC(MODIFIER||||||||||1)	GT:DP:AD:AF:RAF:SB:SC:PF	0	0.0041	0	0.0044	0	0.0051	0	0	1	1	0.0047	0	0	0.0048	0.0052	0	0.0052	0	0	0.0044
NC_000913.3	250643	lafU	b0230	A	G	50.66	PASS	SN=0;STA=250642;STO=250643;TYP=SUB;R1P=81;R1M=71;R2P=75;R2M=76;AD=303;DP=7270;MCOV=-41;PPC=301;AF=0.0417;RAF=0.0000;LS=34844;MQS=18180;MQM=60;BQS=11039;BQM=39;EDS=9908;EDM=75;IDS=299508;IDM=992;CED=601;HMP=2;SB=0.9999;EFF=NON_SYNONYMOUS_CODING(MODERATE|MISSENSE|gAc/gGc|D191G|251|lafU|protein_coding|CODING|b0230|1|1|WARNING_TRANSCRIPT_NO_START_CODON)	GT:DP:AD:AF:RAF:SB:SC:PF	0	0	0	0	0	0	0	0	1	1	0	0.0061	0	0	0.0059	0	0	0.0125	0	0.0062
NC_000913.3	275956	mmuP	NP_414794.4	T	A	57.12	PASS	SN=0;STA=275955;STO=275956;TYP=SUB;R1P=68;R1M=69;R2P=73;R2M=94;AD=304;DP=6538;MCOV=-41;PPC=302;AF=0.0465;RAF=0.0000;LS=34157;MQS=18240;MQM=60;BQS=10982;BQM=39;EDS=9252;EDM=74;IDS=300569;IDM=992;CED=601;HMP=0;SB=0.9997;EFF=NON_SYNONYMOUS_CODING(MODERATE|MISSENSE|gTg/gAg|V211E|467|mmuP|protein_coding|CODING|NP_414794.4|1|1)	GT:DP:AD:AF:RAF:SB:SC:PF	0	0	0.0071	0	0	0.0063	0	0	0.994	1	0.0129	0	0.0068	0.0068	0	0	0	0	0	0
NC_000913.3	325504	0	0	T	C	58.16	PASS	SN=0;STA=325503;STO=325504;TYP=SUB;R1P=90;R1M=119;R2P=80;R2M=138;AD=427;DP=10465;MCOV=-41;PPC=423;AF=0.0408;RAF=0.0000;LS=45851;MQS=25620;MQM=60;BQS=15933;BQM=39;EDS=13989;EDM=75;IDS=422159;IDM=992;CED=601;HMP=0;SB=0.9993;EFF=INTERGENIC(MODIFIER||||||||||1)	GT:DP:AD:AF:RAF:SB:SC:PF	0	0	0	0	0	0	0	0	0.9896	1	0	0	0	0	0	0	0	0	0	0
NC_000913.3	337411	yahF	NP_414854.1	T	C	57.62	PASS	SN=0;STA=337410;STO=337411;TYP=SUB;R1P=67;R1M=93;R2P=70;R2M=98;AD=328;DP=6677;MCOV=-41;PPC=327;AF=0.0491;RAF=0.0000;LS=37687;MQS=19680;MQM=60;BQS=12143;BQM=39;EDS=10595;EDM=75;IDS=323644;IDM=992;CED=601;HMP=0;SB=0.9994;EFF=NON_SYNONYMOUS_CODING(MODERATE|MISSENSE|Ttt/Ctt|F212L|515|yahF|protein_coding|CODING|NP_414854.1|1|1)	GT:DP:AD:AF:RAF:SB:SC:PF	0.0071	0	0	0	0	0	0	0	0.994	1	0	0	0	0	0	0	0	0	0	0
NC_000913.3	356171	codA	NP_414871.1	G	T	58	PASS	SN=0;STA=356170;STO=356171;TYP=SUB;R1P=85;R1M=87;R2P=92;R2M=79;AD=343;DP=8521;MCOV=-41;PPC=341;AF=0.0403;RAF=0.0000;LS=38792;MQS=20580;MQM=60;BQS=12568;BQM=39;EDS=11616;EDM=75;IDS=339181;IDM=992;CED=601;HMP=1;SB=0.9999;EFF=NON_SYNONYMOUS_CODING(MODERATE|MISSENSE|aGt/aTt|S417I|419|codB|protein_coding|CODING|NP_414870.1|1|1|WARNING_TRANSCRIPT_NO_START_CODON),NON_SYNONYMOUS_CODING(MODERATE|MISSENSE|…	GT:DP:AD:AF:RAF:SB:SC:PF	0.005	0	0	0	0	0	0	0	0.9946	1	0	0	0	0.0051	0	0	0	0	0	0.0051
NC_000913.3	360583	cynX	NP_414875.1	G	A	57.42	PASS	SN=0;STA=360582;STO=360583;TYP=SUB;R1P=35;R1M=33;R2P=32;R2M=46;AD=146;DP=7073;MCOV=-41;PPC=146;AF=0.0206;RAF=0.0000;LS=20536;MQS=8760;MQM=60;BQS=5497;BQM=39;EDS=5758;EDM=73;IDS=143801;IDM=992;CED=601;HMP=0;SB=0.9997;EFF=NON_SYNONYMOUS_CODING(MODERATE|MISSENSE|Gcg/Acg|A198T|384|cynX|protein_coding|CODING|NP_414875.1|1|1)	GT:DP:AD:AF:RAF:SB:SC:PF	0	0	0.0075	0	0	0	0	0	0	1	0	0	0	0	0	0	0	0	0	0
NC_000913.3	368027	mhpR	NP_414880.2	A	T	56.21	PASS	SN=0;STA=368026;STO=368027;TYP=SUB;R1P=102;R1M=94;R2P=104;R2M=81;AD=381;DP=7682;MCOV=-41;PPC=380;AF=0.0496;RAF=0.0000;LS=43434;MQS=22860;MQM=60;BQS=13583;BQM=39;EDS=12529;EDM=75;IDS=373171;IDM=992;CED=601;HMP=0;SB=0.9997;EFF=NON_SYNONYMOUS_CODING(MODERATE|MISSENSE|Ttt/Att|F132I|277|mhpR|protein_coding|CODING|NP_414880.2|1|1)	GT:DP:AD:AF:RAF:SB:SC:PF	0	0	0	0	0	0	0	0	0.9855	1	0	0	0	0	0	0	0	0	0	0
NC_000913.3	369329	mhpA	NP_414881.1	C	T	58.73	PASS	SN=0;STA=369328;STO=369329;TYP=SUB;R1P=105;R1M=89;R2P=79;R2M=96;AD=369;DP=7891;MCOV=-41;PPC=369;AF=0.0468;RAF=0.0000;LS=42391;MQS=22140;MQM=60;BQS=13616;BQM=39;EDS=12319;EDM=75;IDS=365116;IDM=992;CED=601;HMP=0;SB=1.0000;EFF=NON_SYNONYMOUS_CODING(MODERATE|MISSENSE|cCg/cTg|P240L|554|mhpA|protein_coding|CODING|NP_414881.1|1|1)	GT:DP:AD:AF:RAF:SB:SC:PF	0	0	0	0	0	0	0	0	1	1	0	0	0	0	0	0	0	0	0	0
NC_000913.3	379416	frmA	NP_414890.1	C	T	58.22	PASS	SN=0;STA=379415;STO=379416;TYP=SUB;R1P=91;R1M=98;R2P=89;R2M=86;AD=364;DP=7764;MCOV=-41;PPC=355;AF=0.0469;RAF=0.0000;LS=41353;MQS=21840;MQM=60;BQS=13423;BQM=39;EDS=12502;EDM=75;IDS=359831;IDM=992;CED=601;HMP=0;SB=1.0000;EFF=SYNONYMOUS_CODING(LOW|SILENT|ccG/ccA|P52|369|frmA|protein_coding|CODING|NP_414890.1|1|1)	GT:DP:AD:AF:RAF:SB:SC:PF	0	0	0	0	0	0	0	0	1	1	0.006	0	0	0	0	0	0	0	0	0
NC_000913.3	445485	yajR	NP_414961.4	G	T	56.79	PASS	SN=0;STA=445484;STO=445485;TYP=SUB;R1P=112;R1M=67;R2P=98;R2M=88;AD=365;DP=8109;MCOV=-41;PPC=362;AF=0.0450;RAF=0.0000;LS=40023;MQS=21900;MQM=60;BQS=13396;BQM=39;EDS=11939;EDM=75;IDS=358470;IDM=992;CED=601;HMP=1;SB=0.9995;EFF=SYNONYMOUS_CODING(LOW|SILENT|gtC/gtA|V394|454|yajR|protein_coding|CODING|NP_414961.4|1|1)	GT:DP:AD:AF:RAF:SB:SC:PF	0	0	0.0051	0	0	0.0091	0	0	0.9954	1	0.0048	0	0.0051	0	0.0054	0	0	0	0.0052	0.0049
NC_000913.3	456940	clpP	NP_414971.1	G	A	58.16	PASS	SN=0;STA=456939;STO=456940;TYP=SUB;R1P=126;R1M=101;R2P=111;R2M=98;AD=436;DP=9211;MCOV=-41;PPC=429;AF=0.0473;RAF=0.0000;LS=48597;MQS=26152;MQM=60;BQS=16002;BQM=39;EDS=14197;EDM=75;IDS=430972;IDM=992;CED=601;HMP=0;SB=0.9997;EFF=NON_SYNONYMOUS_CODING(MODERATE|MISSENSE|atG/atA|M88I|207|clpP|protein_coding|CODING|NP_414971.1|1|1)	GT:DP:AD:AF:RAF:SB:SC:PF	0	0	0.0046	0	0	0	0	0	1	1	0	0	0	0	0	0	0	0	0.0044	0
NC_000913.3	477108	ylaB	NP_414990.2	G	A	57.27	PASS	SN=0;STA=477107;STO=477108;TYP=SUB;R1P=85;R1M=87;R2P=106;R2M=81;AD=359;DP=8968;MCOV=-41;PPC=355;AF=0.0400;RAF=0.0000;LS=39540;MQS=21540;MQM=60;BQS=13155;BQM=39;EDS=11253;EDM=75;IDS=354960;IDM=992;CED=601;HMP=0;SB=0.9998;EFF=NON_SYNONYMOUS_CODING(MODERATE|MISSENSE|Ccg/Tcg|P504S|516|ylaB|protein_coding|CODING|NP_414990.2|1|1|WARNING_TRANSCRIPT_NO_START_CODON)	GT:DP:AD:AF:RAF:SB:SC:PF	0	0	0.0041	0	0	0	0	0	1	1	0	0	0	0	0	0	0	0	0	0
NC_000913.3	479257	0	0	G	A	58.38	PASS	SN=0;STA=479256;STO=479257;TYP=SUB;R1P=99;R1M=125;R2P=120;R2M=120;AD=464;DP=10201;MCOV=-41;PPC=462;AF=0.0455;RAF=0.0000;LS=51601;MQS=27840;MQM=60;BQS=17088;BQM=39;EDS=15282;EDM=75;IDS=458567;IDM=992;CED=601;HMP=0;SB=0.9998;EFF=INTERGENIC(MODIFIER||||||||||1)	GT:DP:AD:AF:RAF:SB:SC:PF	0	0	0	0	0	0	0	0	0.9963	1	0	0	0	0	0	0	0	0	0	0
NC_000913.3	491163	ybaN	NP_415001.1	G	C	50.9	PASS	SN=0;STA=491162;STO=491163;TYP=SUB;R1P=42;R1M=43;R2P=53;R2M=59;AD=197;DP=8486;MCOV=-41;PPC=196;AF=0.0232;RAF=0.0000;LS=27624;MQS=11820;MQM=60;BQS=7255;BQM=39;EDS=7878;EDM=75;IDS=195139;IDM=992;CED=601;HMP=2;SB=0.9999;EFF=NON_SYNONYMOUS_CODING(MODERATE|MISSENSE|atG/atC|M94I|125|ybaN|protein_coding|CODING|NP_415001.1|1|1)	GT:DP:AD:AF:RAF:SB:SC:PF	0	0	0	0	0.0043	0	0	0	0	1	0	0	0	0	0	0	0	0	0	0
NC_000913.3	511881	glsA	NP_415018.1	G	T	57.7	PASS	SN=0;STA=511880;STO=511881;TYP=SUB;R1P=99;R1M=100;R2P=84;R2M=101;AD=384;DP=8502;MCOV=-41;PPC=380;AF=0.0452;RAF=0.0000;LS=43513;MQS=23040;MQM=60;BQS=14044;BQM=39;EDS=12968;EDM=75;IDS=376201;IDM=989;CED=601;HMP=0;SB=0.9998;EFF=NON_SYNONYMOUS_CODING(MODERATE|MISSENSE|Ggc/Tgc|G81C|310|glsA|protein_coding|CODING|NP_415018.1|1|1)	GT:DP:AD:AF:RAF:SB:SC:PF	0.0043	0.0099	0.0049	0.011	0.0048	0	0	0	1	1	0.0052	0	0	0	0	0	0	0	0	0
NC_000913.3	518278	ybbN	NP_415025.4	A	G	57.98	PASS	SN=0;STA=518277;STO=518278;TYP=SUB;R1P=103;R1M=89;R2P=89;R2M=94;AD=375;DP=8683;MCOV=-41;PPC=372;AF=0.0432;RAF=0.0000;LS=42123;MQS=22500;MQM=60;BQS=13883;BQM=39;EDS=11885;EDM=75;IDS=370924;IDM=992;CED=601;HMP=0;SB=0.9999;EFF=START_LOST(HIGH|MISSENSE|aTg/aCg|M1T|284|ybbN|protein_coding|CODING|NP_415025.4|1|1);LOF=(ybbN|b0492|1|1.00)	GT:DP:AD:AF:RAF:SB:SC:PF	0.0044	0	0	0	0	0	0	0	1	1	0	0	0	0	0	0	0	0.005	0	0
NC_000913.3	531688	allS	NP_415037.1	C	G	46.59	PASS	SN=0;STA=531687;STO=531688;TYP=SUB;R1P=38;R1M=42;R2P=36;R2M=48;AD=164;DP=7798;MCOV=-41;PPC=164;AF=0.0210;RAF=0.0000;LS=23024;MQS=9840;MQM=60;BQS=6120;BQM=39;EDS=6641;EDM=75;IDS=162524;IDM=992;CED=601;HMP=4;SB=0.9996;EFF=SYNONYMOUS_CODING(LOW|SILENT|ccG/ccC|P178|308|allS|protein_coding|CODING|NP_415037.1|1|1)	GT:DP:AD:AF:RAF:SB:SC:PF	0	0	0	0	0	0	0	0	0.0051	1	0	0	0	0	0	0	0	0	0	0
NC_000913.3	555206	cysS	NP_415059.1	G	A	57.62	PASS	SN=0;STA=555205;STO=555206;TYP=SUB;R1P=64;R1M=90;R2P=84;R2M=99;AD=337;DP=7308;MCOV=-41;PPC=334;AF=0.0461;RAF=0.0000;LS=38494;MQS=20200;MQM=60;BQS=12087;BQM=39;EDS=11487;EDM=75;IDS=333005;IDM=992;CED=601;HMP=0;SB=0.9996;EFF=NON_SYNONYMOUS_CODING(MODERATE|MISSENSE|gGc/gAc|G199D|461|cysS|protein_coding|CODING|NP_415059.1|1|1)	GT:DP:AD:AF:RAF:SB:SC:PF	0	0	0	0	0	0	0	0	0.9944	1	0	0	0	0	0	0	0	0	0	0
NC_000913.3	591642	nfrB	NP_415101.1	C	A	58.04	PASS	SN=0;STA=591641;STO=591642;TYP=SUB;R1P=85;R1M=91;R2P=84;R2M=92;AD=352;DP=8236;MCOV=-41;PPC=351;AF=0.0427;RAF=0.0000;LS=40211;MQS=21120;MQM=60;BQS=12997;BQM=39;EDS=11258;EDM=75;IDS=348179;IDM=992;CED=601;HMP=1;SB=0.9998;EFF=NON_SYNONYMOUS_CODING(MODERATE|MISSENSE|Gtc/Ttc|V513F|745|nfrB|protein_coding|CODING|NP_415101.1|1|1|WARNING_TRANSCRIPT_NO_START_CODON)	GT:DP:AD:AF:RAF:SB:SC:PF	0	0	0.0051	0	0	0.0054	0.005	0	0.9946	1	0	0	0	0	0	0	0	0	0	0
NC_000913.3	596734	cusC	NP_415104.1	G	A	48.65	PASS	SN=0;STA=596733;STO=596734;TYP=SUB;R1P=124;R1M=105;R2P=105;R2M=119;AD=453;DP=9429;MCOV=-41;PPC=449;AF=0.0480;RAF=0.0000;LS=50598;MQS=27180;MQM=60;BQS=16678;BQM=39;EDS=14766;EDM=74;IDS=447726;IDM=992;CED=601;HMP=3;SB=1.0000;EFF=NON_SYNONYMOUS_CODING(MODERATE|MISSENSE|Gat/Aat|D379N|457|cusC|protein_coding|CODING|NP_415104.1|1|1)	GT:DP:AD:AF:RAF:SB:SC:PF	0	0.0041	0	0	0	0	0	0	1	1	0	0	0	0.0043	0	0	0	0	0.0044	0
NC_000913.3	667678	mrdA	NP_415168.1	C	T	46.47	PASS	SN=0;STA=667677;STO=667678;TYP=SUB;R1P=102;R1M=75;R2P=87;R2M=87;AD=351;DP=9096;MCOV=-41;PPC=347;AF=0.0386;RAF=0.0000;LS=39174;MQS=21060;MQM=60;BQS=12880;BQM=39;EDS=11375;EDM=75;IDS=346895;IDM=992;CED=601;HMP=4;SB=0.9997;EFF=SYNONYMOUS_CODING(LOW|SILENT|tcG/tcA|S180|633|mrdA|protein_coding|CODING|NP_415168.1|1|1)	GT:DP:AD:AF:RAF:SB:SC:PF	0	0	0	0	0.0043	0	0	0	0.9951	1	0	0.004	0.0056	0	0	0	0	0	0	0
NC_000913.3	670040	nadD	NP_415172.1	T	C	57.51	PASS	SN=0;STA=670039;STO=670040;TYP=SUB;R1P=40;R1M=44;R2P=35;R2M=30;AD=149;DP=9170;MCOV=-41;PPC=148;AF=0.0162;RAF=0.0000;LS=20702;MQS=8921;MQM=60;BQS=5451;BQM=39;EDS=5710;EDM=73;IDS=147266;IDM=992;CED=601;HMP=0;SB=1.0000;EFF=NON_SYNONYMOUS_CODING(MODERATE|MISSENSE|aAc/aGc|N178S|213|nadD|protein_coding|CODING|NP_415172.1|1|1)	GT:DP:AD:AF:RAF:SB:SC:PF	0	0	0	0.0046	0	0	0.0044	0	0	1	0	0	0	0	0	0	0	0	0	0.0044
NC_000913.3	686949	gltI	NP_415188.1	C	T	58.37	PASS	SN=0;STA=686948;STO=686949;TYP=SUB;R1P=106;R1M=116;R2P=106;R2M=109;AD=437;DP=10797;MCOV=-41;PPC=435;AF=0.0405;RAF=0.0000;LS=48160;MQS=26220;MQM=60;BQS=16335;BQM=39;EDS=13504;EDM=75;IDS=432029;IDM=992;CED=601;HMP=1;SB=0.9999;EFF=NON_SYNONYMOUS_CODING(MODERATE|MISSENSE|Gat/Aat|D267N|302|gltI|protein_coding|CODING|NP_415188.1|1|1)	GT:DP:AD:AF:RAF:SB:SC:PF	0	0.0034	0	0	0.0035	0.0034	0	0	1	1	0	0	0	0	0	0	0	0	0.0038	0
NC_000913.3	703510	nagB	NP_415204.1	C	A	48.41	PASS	SN=0;STA=703509;STO=703510;TYP=SUB;R1P=108;R1M=104;R2P=113;R2M=87;AD=412;DP=9363;MCOV=-41;PPC=409;AF=0.0440;RAF=0.0000;LS=45625;MQS=24720;MQM=60;BQS=15133;BQM=39;EDS=13078;EDM=75;IDS=407247;IDM=992;CED=601;HMP=3;SB=0.9997;EFF=SYNONYMOUS_CODING(LOW|SILENT|ccG/ccT|P34|266|nagB|protein_coding|CODING|NP_415204.1|1|1)	GT:DP:AD:AF:RAF:SB:SC:PF	0.0045	0	0	0	0.004	0	0	0	1	1	0	0	0	0	0	0	0.0047	0	0	0
NC_000913.3	709499	chiP	NP_415207.1	C	T	58.16	PASS	SN=0;STA=709498;STO=709499;TYP=SUB;R1P=47;R1M=46;R2P=31;R2M=36;AD=160;DP=9438;MCOV=-41;PPC=159;AF=0.0170;RAF=0.0000;LS=22267;MQS=9600;MQM=60;BQS=5933;BQM=39;EDS=6825;EDM=73;IDS=158289;IDM=992;CED=601;HMP=0;SB=0.9999;EFF=NON_SYNONYMOUS_CODING(MODERATE|MISSENSE|aCc/aTc|T389I|468|chiP|protein_coding|CODING|NP_415207.1|1|1)	GT:DP:AD:AF:RAF:SB:SC:PF	0	0.0047	0	0	0.008	0.0043	0	0	0	1	0	0	0	0.0045	0	0	0	0	0	0
NC_000913.3	710704	uof	YP_001491546.1	C	A	58.12	PASS	SN=0;STA=710703;STO=710704;TYP=SUB;R1P=120;R1M=127;R2P=115;R2M=124;AD=486;DP=11699;MCOV=-41;PPC=483;AF=0.0415;RAF=0.0000;LS=52215;MQS=29150;MQM=60;BQS=17713;BQM=39;EDS=15032;EDM=75;IDS=480351;IDM=992;CED=601;HMP=0;SB=0.9999;EFF=NON_SYNONYMOUS_CODING(MODERATE|MISSENSE|Gca/Tca|A8S|28|uof|protein_coding|CODING|YP_001491546.1|1|1)	GT:DP:AD:AF:RAF:SB:SC:PF	0	0	0	0	0.003	0	0	0	0.9969	1	0	0	0	0	0	0	0	0	0	0
NC_000913.3	724393	kdpD	NP_415223.1	G	C	57.62	PASS	SN=0;STA=724392;STO=724393;TYP=SUB;R1P=89;R1M=104;R2P=78;R2M=94;AD=365;DP=7896;MCOV=-41;PPC=361;AF=0.0462;RAF=0.0000;LS=41164;MQS=21900;MQM=60;BQS=13281;BQM=39;EDS=11671;EDM=74;IDS=360737;IDM=992;CED=601;HMP=0;SB=0.9997;EFF=NON_SYNONYMOUS_CODING(MODERATE|MISSENSE|Ccc/Gcc|P8A|894|kdpD|protein_coding|CODING|NP_415223.1|1|1)	GT:DP:AD:AF:RAF:SB:SC:PF	0	0	0	0	0	0	0	0	0.9951	1	0	0	0.0056	0	0	0	0	0	0	0
NC_000913.3	810291	bioB	NP_415296.1	C	T	58.01	PASS	SN=0;STA=810290;STO=810291;TYP=SUB;R1P=73;R1M=82;R2P=72;R2M=86;AD=313;DP=7731;MCOV=-41;PPC=309;AF=0.0405;RAF=0.0000;LS=35923;MQS=18778;MQM=60;BQS=11539;BQM=39;EDS=10926;EDM=74;IDS=309222;IDM=992;CED=601;HMP=0;SB=0.9997;EFF=SYNONYMOUS_CODING(LOW|SILENT|gcC/gcT|A316|346|bioB|protein_coding|CODING|NP_415296.1|1|1)	GT:DP:AD:AF:RAF:SB:SC:PF	0	0	0	0	0	0	0	0	1	1	0	0	0	0	0	0	0	0.0049	0	0
NC_000913.3	814686	uvrB	NP_415300.1	G	T	57.7	PASS	SN=0;STA=814685;STO=814686;TYP=SUB;R1P=102;R1M=85;R2P=103;R2M=81;AD=371;DP=8329;MCOV=-41;PPC=371;AF=0.0445;RAF=0.0000;LS=41203;MQS=22260;MQM=60;BQS=13502;BQM=39;EDS=11606;EDM=74;IDS=366932;IDM=992;CED=601;HMP=0;SB=0.9996;EFF=SYNONYMOUS_CODING(LOW|SILENT|ccG/ccT|P387|673|uvrB|protein_coding|CODING|NP_415300.1|1|1)	GT:DP:AD:AF:RAF:SB:SC:PF	0.0055	0	0	0	0	0	0	0	1	1	0	0	0	0	0	0	0	0	0.0047	0
NC_000913.3	815167	uvrB	NP_415300.1	G	T	58.03	PASS	SN=0;STA=815166;STO=815167;TYP=SUB;R1P=89;R1M=100;R2P=109;R2M=89;AD=387;DP=8668;MCOV=-41;PPC=383;AF=0.0446;RAF=0.0000;LS=43210;MQS=23220;MQM=60;BQS=14254;BQM=39;EDS=11960;EDM=75;IDS=382553;IDM=992;CED=601;HMP=0;SB=0.9999;EFF=NON_SYNONYMOUS_CODING(MODERATE|MISSENSE|Ggt/Tgt|G548C|673|uvrB|protein_coding|CODING|NP_415300.1|1|1)	GT:DP:AD:AF:RAF:SB:SC:PF	0.005	0.0044	0.0149	0.0048	0.013	0	0	0	1	1	0	0	0	0.005	0	0	0	0	0	0
NC_000913.3	833970	dinG	NP_415320.1	C	A	58.11	PASS	SN=0;STA=833969;STO=833970;TYP=SUB;R1P=67;R1M=86;R2P=67;R2M=117;AD=337;DP=8214;MCOV=-41;PPC=336;AF=0.0410;RAF=0.0000;LS=38341;MQS=20220;MQM=60;BQS=12366;BQM=39;EDS=11271;EDM=75;IDS=333254;IDM=992;CED=601;HMP=0;SB=0.9993;EFF=NON_SYNONYMOUS_CODING(MODERATE|MISSENSE|Cct/Act|P301T|716|dinG|protein_coding|CODING|NP_415320.1|1|1)	GT:DP:AD:AF:RAF:SB:SC:PF	0	0	0	0	0	0	0	0	1	1	0.0112	0	0.0053	0	0	0	0.0049	0.0048	0	0.0053
NC_000913.3	863916	fsaA	NP_415346.4	G	T	57.59	PASS	SN=0;STA=863915;STO=863916;TYP=SUB;R1P=84;R1M=103;R2P=109;R2M=91;AD=387;DP=8351;MCOV=-41;PPC=383;AF=0.0463;RAF=0.0000;LS=42951;MQS=23220;MQM=60;BQS=14109;BQM=39;EDS=12225;EDM=75;IDS=382514;IDM=992;CED=601;HMP=0;SB=1.0000;EFF=NON_SYNONYMOUS_CODING(MODERATE|MISSENSE|gGg/gTg|G92V|220|fsaA|protein_coding|CODING|NP_415346.4|1|1)	GT:DP:AD:AF:RAF:SB:SC:PF	0.0106	0	0	0	0	0	0	0	1	1	0	0	0.0063	0	0	0	0.0038	0	0	0
NC_000913.3	867918	gsiA	NP_415350.2	G	A	57.96	PASS	SN=0;STA=867917;STO=867918;TYP=SUB;R1P=81;R1M=94;R2P=78;R2M=91;AD=344;DP=8088;MCOV=-41;PPC=338;AF=0.0425;RAF=0.0000;LS=38974;MQS=20640;MQM=60;BQS=12872;BQM=39;EDS=11662;EDM=75;IDS=340350;IDM=992;CED=601;HMP=0;SB=0.9997;EFF=SYNONYMOUS_CODING(LOW|SILENT|ctG/ctA|L133|623|gsiA|protein_coding|CODING|NP_415350.2|1|1)	GT:DP:AD:AF:RAF:SB:SC:PF	0	0	0	0	0.0055	0	0	0	0.9947	1	0	0	0	0	0	0	0	0	0	0
NC_000913.3	936104	ftsK	NP_415410.1	C	T	57.53	PASS	SN=0;STA=936103;STO=936104;TYP=SUB;R1P=97;R1M=62;R2P=109;R2M=90;AD=358;DP=8541;MCOV=-41;PPC=353;AF=0.0419;RAF=0.0000;LS=40354;MQS=21480;MQM=60;BQS=13063;BQM=39;EDS=11652;EDM=75;IDS=354001;IDM=992;CED=601;HMP=1;SB=0.9995;EFF=NON_SYNONYMOUS_CODING(MODERATE|MISSENSE|Ccg/Tcg|P961S|1329|ftsK|protein_coding|CODING|NP_415410.1|1|1)	GT:DP:AD:AF:RAF:SB:SC:PF	0	0	0	0	0	0	0	0	0.9901	1	0	0	0.0041	0	0	0	0	0	0	0
NC_000913.3	941513	dmsA	NP_415414.4	C	T	57.88	PASS	SN=0;STA=941512;STO=941513;TYP=SUB;R1P=88;R1M=69;R2P=66;R2M=74;AD=297;DP=6567;MCOV=-41;PPC=295;AF=0.0452;RAF=0.0000;LS=34197;MQS=17814;MQM=60;BQS=10857;BQM=39;EDS=10013;EDM=74;IDS=293562;IDM=992;CED=601;HMP=0;SB=0.9999;EFF=SYNONYMOUS_CODING(LOW|SILENT|acC/acT|T185|814|dmsA|protein_coding|CODING|NP_415414.4|1|1)	GT:DP:AD:AF:RAF:SB:SC:PF	0	0	0	0.0073	0	0	0	0	1	1	0	0	0	0	0	0	0	0	0	0
NC_000913.3	994752	ssuC	NP_415454.4	C	T	57.13	PASS	SN=0;STA=994751;STO=994752;TYP=SUB;R1P=79;R1M=78;R2P=64;R2M=77;AD=298;DP=6597;MCOV=-41;PPC=292;AF=0.0452;RAF=0.0000;LS=34700;MQS=17880;MQM=60;BQS=10752;BQM=39;EDS=9940;EDM=75;IDS=294486;IDM=992;CED=601;HMP=0;SB=0.9998;EFF=SYNONYMOUS_CODING(LOW|SILENT|ctG/ctA|L27|263|ssuC|protein_coding|CODING|NP_415454.4|1|1)	GT:DP:AD:AF:RAF:SB:SC:PF	0	0	0	0	0	0	0	0	1	1	0	0	0.0068	0	0	0	0	0	0	0
NC_000913.3	1016061	fabA	NP_415474.1	C	A	57.7	PASS	SN=0;STA=1016060;STO=1016061;TYP=SUB;R1P=84;R1M=128;R2P=80;R2M=103;AD=395;DP=9123;MCOV=-41;PPC=390;AF=0.0433;RAF=0.0000;LS=43686;MQS=23700;MQM=60;BQS=14610;BQM=39;EDS=12144;EDM=75;IDS=390576;IDM=992;CED=601;HMP=1;SB=0.9994;EFF=NON_SYNONYMOUS_CODING(MODERATE|MISSENSE|cGt/cTt|R137L|172|fabA|protein_coding|CODING|NP_415474.1|1|1)	GT:DP:AD:AF:RAF:SB:SC:PF	0	0	0	0	0	0	0	0	1	1	0	0	0	0	0	0	0	0	0	0
NC_000913.3	1040151	cbdB	NP_415498.1	C	T	57.96	PASS	SN=0;STA=1040150;STO=1040151;TYP=SUB;R1P=107;R1M=80;R2P=106;R2M=89;AD=382;DP=8524;MCOV=-41;PPC=380;AF=0.0448;RAF=0.0000;LS=43110;MQS=22920;MQM=60;BQS=14029;BQM=39;EDS=12619;EDM=74;IDS=377670;IDM=992;CED=601;HMP=1;SB=0.9996;EFF=NON_SYNONYMOUS_CODING(MODERATE|MISSENSE|Cgc/Tgc|R286C|378|cbdB|protein_coding|CODING|NP_415498.1|1|1)	GT:DP:AD:AF:RAF:SB:SC:PF	0	0.0045	0.0048	0	0	0	0	0	1	1	0	0.0048	0	0	0	0	0	0	0	0.0051
NC_000913.3	1042842	etk	NP_415501.1	C	T	50.9	PASS	SN=0;STA=1042841;STO=1042842;TYP=SUB;R1P=98;R1M=92;R2P=74;R2M=77;AD=341;DP=8421;MCOV=-41;PPC=339;AF=0.0405;RAF=0.0000;LS=37868;MQS=20460;MQM=60;BQS=12335;BQM=39;EDS=11915;EDM=75;IDS=336997;IDM=992;CED=601;HMP=2;SB=1.0000;EFF=NON_SYNONYMOUS_CODING(MODERATE|MISSENSE|Gaa/Aaa|E457K|726|etk|protein_coding|CODING|NP_415501.1|1|1)	GT:DP:AD:AF:RAF:SB:SC:PF	0	0	0.005	0	0	0	0	0	0.995	1	0	0	0	0.005	0	0	0	0.0052	0	0
NC_000913.3	1048782	gfcB	NP_415506.1	AC	A	46.65	PASS	SN=0;STA=1048782;STO=1048783;TYP=DEL;R1P=43;R1M=46;R2P=46;R2M=41;AD=176;DP=9155;MCOV=-41;PPC=175;AF=0.0192;RAF=0.0000;LS=24716;MQS=10560;MQM=60;BQS=6649;BQM=39;EDS=7299;EDM=75;IDS=174523;IDM=992;CED=601;HMP=4;SB=1.0000;EFF=FRAME_SHIFT(HIGH||gtc/|V184|214|gfcB|protein_coding|CODING|NP_415506.1|1|1|WARNING_TRANSCRIPT_NO_START_CODON);LOF=(gfcB|b0986|1|1.00)	GT:DP:AD:AF:RAF:SB:SC:PF	0	0	0	0.0042	0	0	0	0	0	1	0	0	0	0	0	0	0	0	0	0
NC_000913.3	1069189	rutG	NP_415526.4	T	G	58.08	PASS	SN=0;STA=1069188;STO=1069189;TYP=SUB;R1P=73;R1M=109;R2P=91;R2M=92;AD=365;DP=7949;MCOV=-41;PPC=361;AF=0.0459;RAF=0.0000;LS=40855;MQS=21900;MQM=60;BQS=13292;BQM=39;EDS=12235;EDM=74;IDS=360649;IDM=992;CED=601;HMP=0;SB=0.9996;EFF=NON_SYNONYMOUS_CODING(MODERATE|MISSENSE|ttA/ttC|L217F|442|rutG|protein_coding|CODING|NP_415526.4|1|1)	GT:DP:AD:AF:RAF:SB:SC:PF	0	0.0056	0	0	0	0	0	0	0.9952	1	0	0	0	0	0	0	0	0	0	0
NC_000913.3	1083312	efeO	NP_415537.1	C	T	58.14	PASS	SN=0;STA=1083311;STO=1083312;TYP=SUB;R1P=41;R1M=37;R2P=29;R2M=40;AD=147;DP=8989;MCOV=-41;PPC=146;AF=0.0164;RAF=0.0000;LS=20577;MQS=8820;MQM=60;BQS=5594;BQM=39;EDS=6264;EDM=75;IDS=145710;IDM=992;CED=601;HMP=0;SB=0.9998;EFF=NON_SYNONYMOUS_CODING(MODERATE|MISSENSE|cCg/cTg|P357L|375|efeO|protein_coding|CODING|NP_415537.1|1|1)	GT:DP:AD:AF:RAF:SB:SC:PF	0	0	0	0	0	0	0.0049	0	0	1	0.0098	0	0	0	0	0	0	0	0	0
NC_000913.3	1088971	pgaB	NP_415542.1	G	A	58.24	PASS	SN=0;STA=1088970;STO=1088971;TYP=SUB;R1P=116;R1M=129;R2P=119;R2M=117;AD=481;DP=11969;MCOV=-41;PPC=475;AF=0.0402;RAF=0.0000;LS=51394;MQS=28860;MQM=60;BQS=17396;BQM=39;EDS=15592;EDM=75;IDS=475367;IDM=992;CED=601;HMP=0;SB=0.9999;EFF=NON_SYNONYMOUS_CODING(MODERATE|MISSENSE|cCc/cTc|P296L|672|pgaB|protein_coding|CODING|NP_415542.1|1|1)	GT:DP:AD:AF:RAF:SB:SC:PF	0	0	0.0029	0	0.0029	0	0	0	0.9969	1	0	0	0.0029	0	0	0	0.0032	0	0	0
NC_000913.3	1089128	pgaB	NP_415542.1	T	A	58.42	PASS	SN=0;STA=1089127;STO=1089128;TYP=SUB;R1P=36;R1M=45;R2P=44;R2M=51;AD=176;DP=12139;MCOV=-41;PPC=176;AF=0.0145;RAF=0.0000;LS=24683;MQS=10560;MQM=60;BQS=6712;BQM=39;EDS=6790;EDM=75;IDS=174441;IDM=992;CED=601;HMP=0;SB=0.9997;EFF=NON_SYNONYMOUS_CODING(MODERATE|MISSENSE|Aat/Tat|N244Y|672|pgaB|protein_coding|CODING|NP_415542.1|1|1)	GT:DP:AD:AF:RAF:SB:SC:PF	0	0	0	0.003	0	0	0	0	0	1	0	0	0	0	0	0	0	0	0	0
NC_000913.3	1093728	ycdT	NP_415544.1	G	T	58.33	PASS	SN=0;STA=1093727;STO=1093728;TYP=SUB;R1P=96;R1M=181;R2P=125;R2M=165;AD=567;DP=13776;MCOV=-41;PPC=565;AF=0.0412;RAF=0.0000;LS=58793;MQS=34020;MQM=60;BQS=20892;BQM=39;EDS=18216;EDM=75;IDS=560473;IDM=992;CED=601;HMP=0;SB=0.9993;EFF=NON_SYNONYMOUS_CODING(MODERATE|MISSENSE|Gat/Tat|D285Y|452|ycdT|protein_coding|CODING|NP_415544.1|1|1)	GT:DP:AD:AF:RAF:SB:SC:PF	0.0024	0.0026	0	0	0	0	0.0078	0	1	1	0.0022	0	0.0042	0	0	0	0	0.0051	0.0027	0.0028
NC_000913.3	1111768	opgH	NP_415567.1	T	A	57.75	PASS	SN=0;STA=1111767;STO=1111768;TYP=SUB;R1P=85;R1M=85;R2P=75;R2M=104;AD=349;DP=8538;MCOV=-41;PPC=344;AF=0.0409;RAF=0.0000;LS=38434;MQS=20940;MQM=60;BQS=12757;BQM=39;EDS=11235;EDM=74;IDS=344798;IDM=992;CED=601;HMP=1;SB=0.9997;EFF=SYNONYMOUS_CODING(LOW|SILENT|ctT/ctA|L302|847|opgH|protein_coding|CODING|NP_415567.1|1|1)	GT:DP:AD:AF:RAF:SB:SC:PF	0	0	0	0	0	0	0.0047	0	1	1	0	0	0	0.0046	0	0	0	0	0	0
NC_000913.3	1157665	0	0	G	C	58.02	PASS	SN=0;STA=1157664;STO=1157665;TYP=SUB;R1P=102;R1M=106;R2P=97;R2M=90;AD=395;DP=10604;MCOV=-41;PPC=392;AF=0.0373;RAF=0.0000;LS=43133;MQS=23700;MQM=60;BQS=14576;BQM=39;EDS=12264;EDM=75;IDS=390670;IDM=992;CED=601;HMP=0;SB=1.0000;EFF=INTERGENIC(MODIFIER||||||||||1)	GT:DP:AD:AF:RAF:SB:SC:PF	0	0	0	0	0	0	0	0	1	1	0	0	0	0	0	0	0	0	0	0
NC_000913.3	1163301	thiK	NP_415624.1	G	A	57.79	PASS	SN=0;STA=1163300;STO=1163301;TYP=SUB;R1P=95;R1M=62;R2P=85;R2M=81;AD=323;DP=7804;MCOV=-41;PPC=320;AF=0.0414;RAF=0.0000;LS=36422;MQS=19380;MQM=60;BQS=11842;BQM=39;EDS=10763;EDM=75;IDS=318716;IDM=992;CED=601;HMP=0;SB=0.9996;EFF=SYNONYMOUS_CODING(LOW|SILENT|ttG/ttA|L14|274|thiK|protein_coding|CODING|NP_415624.1|1|1|WARNING_TRANSCRIPT_NO_START_CODON)	GT:DP:AD:AF:RAF:SB:SC:PF	0	0	0	0	0	0	0	0	0.9944	1	0	0	0	0	0	0	0.0056	0	0	0
NC_000913.3	1217507	ycgG	NP_415686.2	TA	T	48.45	PASS	SN=0;STA=1217507;STO=1217508;TYP=DEL;R1P=130;R1M=97;R2P=106;R2M=130;AD=463;DP=11297;MCOV=-41;PPC=456;AF=0.0410;RAF=0.0000;LS=49301;MQS=27780;MQM=60;BQS=17280;BQM=39;EDS=15680;EDM=75;IDS=457714;IDM=992;CED=601;HMP=3;SB=0.9999;EFF=FRAME_SHIFT(HIGH||aac/|N61|507|ycgG|protein_coding|CODING|NP_415686.2|1|1);LOF=(ycgG|b1168|1|1.00)	GT:DP:AD:AF:RAF:SB:SC:PF	0	0	0	0	0	0	0	0	1	1	0	0	0	0	0	0	0	0	0.0033	0
NC_000913.3	1244197	ycgR	NP_415712.1	C	A	44.75	PASS	SN=0;STA=1244196;STO=1244197;TYP=SUB;R1P=28;R1M=38;R2P=45;R2M=49;AD=160;DP=8766;MCOV=-41;PPC=159;AF=0.0183;RAF=0.0000;LS=22175;MQS=9600;MQM=60;BQS=5824;BQM=39;EDS=6329;EDM=75;IDS=158439;IDM=992;CED=601;HMP=5;SB=0.9997;EFF=NON_SYNONYMOUS_CODING(MODERATE|MISSENSE|Gta/Tta|V111L|244|ycgR|protein_coding|CODING|NP_415712.1|1|1|WARNING_TRANSCRIPT_NO_START_CODON)	GT:DP:AD:AF:RAF:SB:SC:PF	0.0048	0	0	0	0	0	0	0	0	1	0	0	0	0	0	0	0	0.0053	0	0.0043
NC_000913.3	1288586	purU	NP_415748.1	AC	A	57.6	PASS	SN=0;STA=1288586;STO=1288587;TYP=DEL;R1P=124;R1M=109;R2P=107;R2M=107;AD=447;DP=11251;MCOV=-41;PPC=437;AF=0.0397;RAF=0.0000;LS=48227;MQS=26820;MQM=60;BQS=16298;BQM=39;EDS=13464;EDM=73;IDS=441924;IDM=992;CED=601;HMP=1;SB=0.9999;EFF=FRAME_SHIFT(HIGH||tgt/|C13|280|purU|protein_coding|CODING|NP_415748.1|1|1)	GT:DP:AD:AF:RAF:SB:SC:PF	0	0	0	0	0	0	0	0	0.9966	1	0	0	0	0	0	0	0	0	0	0
NC_000913.3	1314237	ompW	NP_415772.1	GT	G	57.08	PASS	SN=0;STA=1314237;STO=1314238;TYP=DEL;R1P=97;R1M=100;R2P=91;R2M=71;AD=359;DP=8899;MCOV=-41;PPC=355;AF=0.0403;RAF=0.0000;LS=40115;MQS=21540;MQM=60;BQS=13128;BQM=39;EDS=11398;EDM=74;IDS=354970;IDM=992;CED=601;HMP=1;SB=0.9998;EFF=FRAME_SHIFT(HIGH||ggt/|G73|212|ompW|protein_coding|CODING|NP_415772.1|1|1);LOF=(ompW|b1256|1|1.00)	GT:DP:AD:AF:RAF:SB:SC:PF	0	0	0	0	0	0	0	0	0.9858	1	0	0	0	0	0	0	0	0	0	0
NC_000913.3	1329104	yciK	NP_415787.1	G	T	58.12	PASS	SN=0;STA=1329103;STO=1329104;TYP=SUB;R1P=114;R1M=88;R2P=91;R2M=96;AD=389;DP=9269;MCOV=-41;PPC=388;AF=0.0420;RAF=0.0000;LS=43171;MQS=23340;MQM=60;BQS=14433;BQM=39;EDS=12740;EDM=75;IDS=384523;IDM=992;CED=601;HMP=1;SB=0.9998;EFF=STOP_GAINED(HIGH|NONSENSE|taC/taA|Y3*|252|yciK|protein_coding|CODING|NP_415787.1|1|1)	GT:DP:AD:AF:RAF:SB:SC:PF	0	0	0	0	0	0	0.0049	0	1	1	0	0	0	0	0	0	0.0043	0	0	0
NC_000913.3	1331839	topA	NP_415790.1	G	T	57.76	PASS	SN=0;STA=1331838;STO=1331839;TYP=SUB;R1P=81;R1M=79;R2P=104;R2M=80;AD=344;DP=7736;MCOV=-41;PPC=338;AF=0.0445;RAF=0.0000;LS=38219;MQS=20640;MQM=60;BQS=12532;BQM=39;EDS=11705;EDM=74;IDS=340098;IDM=992;CED=601;HMP=0;SB=0.9997;EFF=SYNONYMOUS_CODING(LOW|SILENT|gcG/gcT|A264|865|topA|protein_coding|CODING|NP_415790.1|1|1)	GT:DP:AD:AF:RAF:SB:SC:PF	0	0	0	0	0	0	0	0	0.9903	1	0	0	0	0	0	0	0	0	0	0
NC_000913.3	1362596	0	0	G	A	58.18	PASS	SN=0;STA=1362595;STO=1362596;TYP=SUB;R1P=33;R1M=53;R2P=53;R2M=39;AD=178;DP=9356;MCOV=-41;PPC=175;AF=0.0190;RAF=0.0000;LS=25048;MQS=10680;MQM=60;BQS=6608;BQM=38;EDS=7284;EDM=75;IDS=176478;IDM=992;CED=601;HMP=1;SB=0.9999;EFF=INTERGENIC(MODIFIER||||||||||1)	GT:DP:AD:AF:RAF:SB:SC:PF	0	0	0	0	0	0	0	0	0	1	0	0	0	0	0	0	0.0043	0	0	0
NC_000913.3	1369298	pspC	NP_415822.1	G	A	57.93	PASS	SN=0;STA=1369297;STO=1369298;TYP=SUB;R1P=81;R1M=119;R2P=113;R2M=91;AD=404;DP=9565;MCOV=-41;PPC=401;AF=0.0422;RAF=0.0000;LS=44626;MQS=24240;MQM=60;BQS=14683;BQM=39;EDS=13295;EDM=74;IDS=399541;IDM=992;CED=601;HMP=0;SB=0.9998;EFF=NON_SYNONYMOUS_CODING(MODERATE|MISSENSE|Gcg/Acg|A92T|119|pspC|protein_coding|CODING|NP_415822.1|1|1)	GT:DP:AD:AF:RAF:SB:SC:PF	0	0	0	0	0	0	0	0	0.9959	1	0	0	0	0	0	0	0	0	0	0
NC_000913.3	1380488	ycjU	NP_415833.1	TG	T	48.69	PASS	SN=0;STA=1380488;STO=1380489;TYP=DEL;R1P=97;R1M=96;R2P=94;R2M=78;AD=365;DP=8100;MCOV=-41;PPC=365;AF=0.0451;RAF=0.0000;LS=42765;MQS=21900;MQM=60;BQS=13362;BQM=39;EDS=12420;EDM=75;IDS=361072;IDM=992;CED=601;HMP=3;SB=0.9998;EFF=FRAME_SHIFT(HIGH||ctg/|L114|219|ycjU|protein_coding|CODING|NP_415833.1|1|1);LOF=(ycjU|b1317|1|1.00)	GT:DP:AD:AF:RAF:SB:SC:PF	0	0	0	0	0	0	0	0	0.9886	1	0	0	0	0	0	0	0	0	0	0
NC_000913.3	1397396	ynaJ	NP_415848.1	G	A	58.46	PASS	SN=0;STA=1397395;STO=1397396;TYP=SUB;R1P=55;R1M=58;R2P=42;R2M=39;AD=194;DP=11471;MCOV=-41;PPC=194;AF=0.0169;RAF=0.0000;LS=27052;MQS=11640;MQM=60;BQS=7216;BQM=39;EDS=7729;EDM=75;IDS=192054;IDM=992;CED=601;HMP=0;SB=1.0000;EFF=NON_SYNONYMOUS_CODING(MODERATE|MISSENSE|gGg/gAg|G11E|85|ynaJ|protein_coding|CODING|NP_415848.1|1|1)	GT:DP:AD:AF:RAF:SB:SC:PF	0	0	0	0	0.0035	0	0	0	0.0032	1	0	0	0.0031	0	0	0	0	0	0	0
NC_000913.3	1411868	ttcA	NP_415860.1	G	A	57.98	PASS	SN=0;STA=1411867;STO=1411868;TYP=SUB;R1P=41;R1M=59;R2P=40;R2M=53;AD=193;DP=11660;MCOV=-41;PPC=193;AF=0.0166;RAF=0.0000;LS=27063;MQS=11580;MQM=60;BQS=7036;BQM=39;EDS=7539;EDM=75;IDS=191260;IDM=992;CED=601;HMP=0;SB=0.9994;EFF=SYNONYMOUS_CODING(LOW|SILENT|ggC/ggT|G27|311|ttcA|protein_coding|CODING|NP_415860.1|1|1)	GT:DP:AD:AF:RAF:SB:SC:PF	0	0	0	0	0	0	0	0	0	1	0.0032	0	0	0	0.0034	0	0	0	0	0
NC_000913.3	1412547	intR	NP_415861.1	A	T	58.26	PASS	SN=0;STA=1412546;STO=1412547;TYP=SUB;R1P=150;R1M=107;R2P=163;R2M=131;AD=551;DP=13129;MCOV=-41;PPC=546;AF=0.0420;RAF=0.0000;LS=58677;MQS=33060;MQM=60;BQS=20272;BQM=39;EDS=17613;EDM=75;IDS=544666;IDM=992;CED=601;HMP=0;SB=0.9995;EFF=NON_SYNONYMOUS_CODING(MODERATE|MISSENSE|cTt/cAt|L230H|411|intR|protein_coding|CODING|NP_415861.1|1|1)	GT:DP:AD:AF:RAF:SB:SC:PF	0	0	0	0	0	0	0	0	0.9973	1	0	0	0	0	0	0	0	0	0	0
NC_000913.3	1413098	intR	NP_415861.1	T	A	48.7	PASS	SN=0;STA=1413097;STO=1413098;TYP=SUB;R1P=40;R1M=55;R2P=44;R2M=65;AD=204;DP=13893;MCOV=-41;PPC=202;AF=0.0147;RAF=0.0000;LS=28314;MQS=12208;MQM=60;BQS=7768;BQM=39;EDS=7665;EDM=75;IDS=201895;IDM=992;CED=601;HMP=3;SB=0.9994;EFF=NON_SYNONYMOUS_CODING(MODERATE|MISSENSE|ttA/ttT|L46F|411|intR|protein_coding|CODING|NP_415861.1|1|1)	GT:DP:AD:AF:RAF:SB:SC:PF	0	0	0	0.0047	0	0.0022	0.0023	0	0	1	0	0	0	0	0	0	0	0.0028	0	0
NC_000913.3	1433924	0	0	TG	T	47.65	PASS	SN=0;STA=1433924;STO=1433925;TYP=DEL;R1P=84;R1M=68;R2P=98;R2M=73;AD=323;DP=7929;MCOV=-41;PPC=323;AF=0.0407;RAF=0.0000;LS=34143;MQS=9939;MQM=40;BQS=11683;BQM=39;EDS=10104;EDM=74;IDS=319503;IDM=992;CED=601;HMP=3;SB=0.9995;EFF=INTERGENIC(MODIFIER||||||||||1)	GT:DP:AD:AF:RAF:SB:SC:PF	0	0	0	0	0	0	0	0	1	1	0	0	0	0	0	0	0	0	0	0
NC_000913.3	1438069	pfo	NP_415896.1	C	T	57.91	PASS	SN=0;STA=1438068;STO=1438069;TYP=SUB;R1P=81;R1M=81;R2P=102;R2M=106;AD=370;DP=8811;MCOV=-41;PPC=369;AF=0.0420;RAF=0.0000;LS=41610;MQS=22200;MQM=60;BQS=13670;BQM=39;EDS=11486;EDM=75;IDS=366033;IDM=992;CED=601;HMP=1;SB=1.0000;EFF=NON_SYNONYMOUS_CODING(MODERATE|MISSENSE|Gat/Aat|D906N|1174|pfo|protein_coding|CODING|NP_415896.1|1|1)	GT:DP:AD:AF:RAF:SB:SC:PF	0	0.0048	0	0	0	0.0041	0	0	0.9902	1	0	0	0.0052	0	0	0	0	0	0.0046	0.0052
NC_000913.3	1438926	pfo	NP_415896.1	A	G	57.24	PASS	SN=0;STA=1438925;STO=1438926;TYP=SUB;R1P=35;R1M=46;R2P=32;R2M=50;AD=163;DP=7751;MCOV=-41;PPC=162;AF=0.0210;RAF=0.0000;LS=22933;MQS=9780;MQM=60;BQS=5819;BQM=39;EDS=6915;EDM=75;IDS=161563;IDM=992;CED=601;HMP=0;SB=0.9994;EFF=NON_SYNONYMOUS_CODING(MODERATE|MISSENSE|gTa/gCa|V620A|1174|pfo|protein_coding|CODING|NP_415896.1|1|1)	GT:DP:AD:AF:RAF:SB:SC:PF	0	0	0	0	0	0	0	0	0	1	0	0	0	0	0	0	0	0	0	0
NC_000913.3	1601220	lsrR	NP_416029.1	T	C	58.05	PASS	SN=0;STA=1601219;STO=1601220;TYP=SUB;R1P=99;R1M=132;R2P=114;R2M=94;AD=439;DP=12689;MCOV=-41;PPC=435;AF=0.0346;RAF=0.0000;LS=48786;MQS=26340;MQM=60;BQS=16225;BQM=39;EDS=13965;EDM=75;IDS=433878;IDM=992;CED=601;HMP=0;SB=0.9999;EFF=NON_SYNONYMOUS_CODING(MODERATE|MISSENSE|Att/Gtt|I8V|317|lsrR|protein_coding|CODING|NP_416029.1|1|1)	GT:DP:AD:AF:RAF:SB:SC:PF	0	0	0	0.0019	0	0	0.0069	0	0.9961	1	0	0	0	0	0	0	0	0.0037	0	0.0037
NC_000913.3	1606646	lsrF	NP_416034.1	G	A	58.97	PASS	SN=0;STA=1606645;STO=1606646;TYP=SUB;R1P=102;R1M=104;R2P=120;R2M=103;AD=429;DP=11852;MCOV=-41;PPC=421;AF=0.0362;RAF=0.0000;LS=48194;MQS=25740;MQM=60;BQS=15798;BQM=39;EDS=15092;EDM=75;IDS=424165;IDM=992;CED=601;HMP=1;SB=0.9999;EFF=NON_SYNONYMOUS_CODING(MODERATE|MISSENSE|Gat/Aat|D183N|291|lsrF|protein_coding|CODING|NP_416034.1|1|1)	GT:DP:AD:AF:RAF:SB:SC:PF	0	0	0	0	0	0	0	0	1	1	0	0	0	0	0	0	0	0	0	0
NC_000913.3	1613088	glsB	NP_416041.1	G	T	57.32	PASS	SN=0;STA=1613087;STO=1613088;TYP=SUB;R1P=82;R1M=102;R2P=101;R2M=96;AD=381;DP=9970;MCOV=-41;PPC=377;AF=0.0382;RAF=0.0000;LS=42493;MQS=22860;MQM=60;BQS=14081;BQM=39;EDS=12191;EDM=74;IDS=373570;IDM=992;CED=601;HMP=0;SB=0.9998;EFF=NON_SYNONYMOUS_CODING(MODERATE|MISSENSE|gCc/gAc|A55D|308|glsB|protein_coding|CODING|NP_416041.1|1|1|WARNING_TRANSCRIPT_NO_START_CODON)	GT:DP:AD:AF:RAF:SB:SC:PF	0	0.0029	0.0028	0	0	0	0.0097	0	1	1	0	0	0	0	0	0	0	0	0	0
NC_000913.3	1633448	ydfJ	b4600	A	T	56.65	PASS	SN=0;STA=1633447;STO=1633448;TYP=SUB;R1P=68;R1M=92;R2P=55;R2M=91;AD=306;DP=7956;MCOV=-41;PPC=306;AF=0.0385;RAF=0.0000;LS=33396;MQS=9143;MQM=40;BQS=11291;BQM=39;EDS=9014;EDM=71;IDS=302670;IDM=992;CED=601;HMP=0;SB=0.9993;EFF=INTRON(MODIFIER||||455|ydfJ|protein_coding|CODING|b4600|1|1)	GT:DP:AD:AF:RAF:SB:SC:PF	0	0	0	0	0	0	0	0	1	1	0	0	0	0	0	0	0	0	0	0
NC_000913.3	1644506	ydfJ	b4600	A	G	57.86	PASS	SN=0;STA=1644505;STO=1644506;TYP=SUB;R1P=54;R1M=51;R2P=34;R2M=32;AD=171;DP=11557;MCOV=-41;PPC=170;AF=0.0148;RAF=0.0000;LS=23866;MQS=10260;MQM=60;BQS=6390;BQM=39;EDS=6453;EDM=75;IDS=169376;IDM=992;CED=601;HMP=0;SB=0.9999;EFF=INTRON(MODIFIER||||455|ydfJ|protein_coding|CODING|b4600|1|1)	GT:DP:AD:AF:RAF:SB:SC:PF	0	0	0	0	0	0	0	0	0	1	0	0.005	0	0	0	0	0	0	0	0
NC_000913.3	1652326	intQ	b1579	T	C	57.98	PASS	SN=0;STA=1652325;STO=1652326;TYP=SUB;R1P=28;R1M=54;R2P=34;R2M=45;AD=161;DP=13270;MCOV=-41;PPC=161;AF=0.0121;RAF=0.0000;LS=22551;MQS=9660;MQM=60;BQS=5964;BQM=39;EDS=6600;EDM=75;IDS=159285;IDM=992;CED=601;HMP=0;SB=0.9993;EFF=NON_SYNONYMOUS_CODING(MODERATE|MISSENSE|gTt/gCt|V259A|385|intQ|protein_coding|CODING|b1579|1|1|WARNING_TRANSCRIPT_NO_START_CODON),INTRON(MODIFIER||||455|ydfJ|protein_coding|COD…	GT:DP:AD:AF:RAF:SB:SC:PF	0	0	0	0	0	0	0	0	0	1	0	0	0	0	0	0	0	0	0	0
NC_000913.3	1687253	fumA	NP_416129.1	C	T	57.92	PASS	SN=0;STA=1687252;STO=1687253;TYP=SUB;R1P=29;R1M=33;R2P=37;R2M=44;AD=143;DP=8200;MCOV=-41;PPC=143;AF=0.0174;RAF=0.0000;LS=20063;MQS=8580;MQM=60;BQS=5403;BQM=39;EDS=5807;EDM=75;IDS=141801;IDM=992;CED=601;HMP=0;SB=0.9997;EFF=SYNONYMOUS_CODING(LOW|SILENT|tcG/tcA|S375|548|fumA|protein_coding|CODING|NP_416129.1|1|1)	GT:DP:AD:AF:RAF:SB:SC:PF	0	0	0	0	0	0	0	0	0	1	0	0	0.0053	0	0	0	0	0.0055	0	0
NC_000913.3	1696270	0	0	G	C	57.46	PASS	SN=0;STA=1696269;STO=1696270;TYP=SUB;R1P=100;R1M=109;R2P=109;R2M=97;AD=415;DP=11075;MCOV=-41;PPC=409;AF=0.0375;RAF=0.0000;LS=45327;MQS=24900;MQM=60;BQS=15261;BQM=39;EDS=13028;EDM=75;IDS=410470;IDM=992;CED=601;HMP=0;SB=1.0000;EFF=INTERGENIC(MODIFIER||||||||||1)	GT:DP:AD:AF:RAF:SB:SC:PF	0	0	0	0	0.0034	0	0	0	1	1	0	0	0.0031	0	0	0	0	0	0	0.003
NC_000913.3	1700227	malX	NP_416138.1	G	A	57.32	PASS	SN=0;STA=1700226;STO=1700227;TYP=SUB;R1P=28;R1M=38;R2P=28;R2M=31;AD=125;DP=4779;MCOV=-41;PPC=125;AF=0.0262;RAF=0.0000;LS=17563;MQS=7500;MQM=60;BQS=4720;BQM=39;EDS=4719;EDM=74;IDS=123855;IDM=992;CED=601;HMP=0;SB=0.9996;EFF=SYNONYMOUS_CODING(LOW|SILENT|tcG/tcA|S291|530|malX|protein_coding|CODING|NP_416138.1|1|1)	GT:DP:AD:AF:RAF:SB:SC:PF	0	0	0	0	0	0	0	0	0	1	0	0	0	0	0	0	0	0	0	0
NC_000913.3	1702550	add	NP_416140.1	G	A	58.24	PASS	SN=0;STA=1702549;STO=1702550;TYP=SUB;R1P=91;R1M=85;R2P=90;R2M=99;AD=365;DP=8462;MCOV=-41;PPC=362;AF=0.0431;RAF=0.0000;LS=40662;MQS=21900;MQM=60;BQS=13555;BQM=39;EDS=12412;EDM=74;IDS=360707;IDM=992;CED=601;HMP=0;SB=1.0000;EFF=NON_SYNONYMOUS_CODING(MODERATE|MISSENSE|atG/atA|M106I|333|add|protein_coding|CODING|NP_416140.1|1|1)	GT:DP:AD:AF:RAF:SB:SC:PF	0	0	0	0	0	0	0	0	1	1	0	0	0	0	0	0	0	0	0.0047	0
NC_000913.3	1707208	rsxC	NP_416146.1	C	T	57.53	PASS	SN=0;STA=1707207;STO=1707208;TYP=SUB;R1P=67;R1M=85;R2P=69;R2M=99;AD=320;DP=7329;MCOV=-41;PPC=316;AF=0.0437;RAF=0.0000;LS=36006;MQS=19200;MQM=60;BQS=11861;BQM=39;EDS=10647;EDM=74;IDS=316530;IDM=992;CED=601;HMP=0;SB=0.9995;EFF=NON_SYNONYMOUS_CODING(MODERATE|MISSENSE|aCg/aTg|T97M|740|rsxC|protein_coding|CODING|NP_416146.1|1|1)	GT:DP:AD:AF:RAF:SB:SC:PF	0	0	0	0.0052	0	0	0	0	1	1	0	0.0057	0	0	0	0	0	0	0	0
NC_000913.3	1712130	nth	NP_416150.1	G	A	57.62	PASS	SN=0;STA=1712129;STO=1712130;TYP=SUB;R1P=192;R1M=169;R2P=168;R2M=165;AD=694;DP=11360;MCOV=-41;PPC=694;AF=0.0611;RAF=0.0000;LS=69885;MQS=41640;MQM=60;BQS=25413;BQM=39;EDS=19346;EDM=75;IDS=685840;IDM=992;CED=601;HMP=0;SB=0.9999;EFF=NON_SYNONYMOUS_CODING(MODERATE|MISSENSE|tGt/tAt|C203Y|211|nth|protein_coding|CODING|NP_416150.1|1|1)	GT:DP:AD:AF:RAF:SB:SC:PF	0	0	0	0	0	0	0.0033	0	1	1	0	0	0	0	0	0	0	0	0.0037	0.0032
NC_000913.3	1731214	lhr	NP_416170.1	C	G	57.54	PASS	SN=0;STA=1731213;STO=1731214;TYP=SUB;R1P=84;R1M=84;R2P=92;R2M=64;AD=324;DP=6507;MCOV=-41;PPC=317;AF=0.0498;RAF=0.0000;LS=36725;MQS=19440;MQM=60;BQS=11816;BQM=39;EDS=10409;EDM=75;IDS=320191;IDM=992;CED=601;HMP=1;SB=0.9997;EFF=NON_SYNONYMOUS_CODING(MODERATE|MISSENSE|Cat/Gat|H710D|1538|lhr|protein_coding|CODING|NP_416170.1|1|1)	GT:DP:AD:AF:RAF:SB:SC:PF	0.0069	0	0	0	0	0	0	0	1	1	0	0	0	0	0	0	0	0	0	0
NC_000913.3	1731562	lhr	NP_416170.1	GAA	G	48.31	PASS	SN=0;STA=1731562;STO=1731564;TYP=DEL;R1P=34;R1M=47;R2P=49;R2M=29;AD=159;DP=7263;MCOV=-41;PPC=158;AF=0.0219;RAF=0.0000;LS=22419;MQS=9540;MQM=60;BQS=5921;BQM=38;EDS=6256;EDM=75;IDS=156906;IDM=992;CED=601;HMP=3;SB=0.9998;EFF=FRAME_SHIFT(HIGH||gaa/|E826|1538|lhr|protein_coding|CODING|NP_416170.1|1|1);LOF=(lhr|b1653|1|1.00)	GT:DP:AD:AF:RAF:SB:SC:PF	0	0	0	0	0	0	0	0	0	1	0	0	0	0	0	0	0	0	0	0
NC_000913.3	1744248	mdtK	YP_025307.1	TC	T	48.44	PASS	SN=0;STA=1744248;STO=1744249;TYP=DEL;R1P=102;R1M=83;R2P=95;R2M=80;AD=360;DP=8294;MCOV=-41;PPC=358;AF=0.0434;RAF=0.0000;LS=40541;MQS=21600;MQM=60;BQS=13239;BQM=39;EDS=11735;EDM=75;IDS=356205;IDM=992;CED=601;HMP=3;SB=0.9997;EFF=FRAME_SHIFT(HIGH||ccg/|P265|457|mdtK|protein_coding|CODING|YP_025307.1|1|1|WARNING_TRANSCRIPT_NO_START_CODON);LOF=(mdtK|b1663|1|1.00)	GT:DP:AD:AF:RAF:SB:SC:PF	0	0	0.0052	0	0	0	0	0	1	1	0	0	0	0	0.0049	0	0	0	0.0046	0
NC_000913.3	1763480	sufB	NP_416198.2	G	T	58.88	PASS	SN=0;STA=1763479;STO=1763480;TYP=SUB;R1P=106;R1M=98;R2P=70;R2M=122;AD=396;DP=8662;MCOV=-41;PPC=394;AF=0.0457;RAF=0.0000;LS=45211;MQS=23760;MQM=60;BQS=14764;BQM=39;EDS=13821;EDM=75;IDS=391459;IDM=992;CED=601;HMP=0;SB=0.9996;EFF=NON_SYNONYMOUS_CODING(MODERATE|MISSENSE|cCg/cAg|P177Q|495|sufB|protein_coding|CODING|NP_416198.2|1|1)	GT:DP:AD:AF:RAF:SB:SC:PF	0	0	0.0094	0.0045	0.006	0.0249	0.0047	0	1	1	0.0054	0	0	0.0109	0.0046	0	0	0.0112	0	0.0051
NC_000913.3	1775016	aroD	NP_416208.1	G	A	58.05	PASS	SN=0;STA=1775015;STO=1775016;TYP=SUB;R1P=29;R1M=47;R2P=44;R2M=42;AD=162;DP=9022;MCOV=-41;PPC=161;AF=0.0180;RAF=0.0000;LS=22633;MQS=9720;MQM=60;BQS=6065;BQM=39;EDS=6396;EDM=75;IDS=160448;IDM=992;CED=601;HMP=1;SB=0.9996;EFF=NON_SYNONYMOUS_CODING(MODERATE|MISSENSE|Gat/Aat|D111N|252|aroD|protein_coding|CODING|NP_416208.1|1|1)	GT:DP:AD:AF:RAF:SB:SC:PF	0	0	0.0042	0	0.0047	0	0	0	0.0047	1	0	0	0	0	0	0	0	0	0	0
NC_000913.3	1778774	ydiP	NP_416211.1	A	G	58.22	PASS	SN=0;STA=1778773;STO=1778774;TYP=SUB;R1P=121;R1M=128;R2P=121;R2M=157;AD=527;DP=12805;MCOV=-41;PPC=524;AF=0.0412;RAF=0.0000;LS=56235;MQS=31620;MQM=60;BQS=19451;BQM=39;EDS=16685;EDM=75;IDS=520872;IDM=992;CED=601;HMP=0;SB=0.9997;EFF=SYNONYMOUS_CODING(LOW|SILENT|atT/atC|I176|303|ydiP|protein_coding|CODING|NP_416211.1|1|1)	GT:DP:AD:AF:RAF:SB:SC:PF	0.0029	0	0	0.0026	0	0	0.0026	0	0.9972	1	0	0	0.0026	0	0	0	0	0	0	0
NC_000913.3	1856220	ydjH	NP_416286.4	G	A	57.82	PASS	SN=0;STA=1856219;STO=1856220;TYP=SUB;R1P=100;R1M=73;R2P=107;R2M=100;AD=380;DP=8796;MCOV=-41;PPC=379;AF=0.0432;RAF=0.0000;LS=42687;MQS=22800;MQM=60;BQS=13861;BQM=39;EDS=12931;EDM=74;IDS=375285;IDM=992;CED=601;HMP=0;SB=0.9997;EFF=NON_SYNONYMOUS_CODING(MODERATE|MISSENSE|Cgt/Tgt|R237C|315|ydjH|protein_coding|CODING|NP_416286.4|1|1)	GT:DP:AD:AF:RAF:SB:SC:PF	0	0	0	0	0	0	0	0	1	1	0	0	0	0.0049	0	0	0	0.0051	0	0
NC_000913.3	1856559	ydjH	NP_416286.4	C	T	57.46	PASS	SN=0;STA=1856558;STO=1856559;TYP=SUB;R1P=112;R1M=87;R2P=91;R2M=92;AD=382;DP=10504;MCOV=-41;PPC=376;AF=0.0364;RAF=0.0000;LS=41340;MQS=22902;MQM=60;BQS=14094;BQM=39;EDS=11717;EDM=75;IDS=377455;IDM=992;CED=601;HMP=1;SB=0.9998;EFF=NON_SYNONYMOUS_CODING(MODERATE|MISSENSE|Gac/Aac|D124N|315|ydjH|protein_coding|CODING|NP_416286.4|1|1)	GT:DP:AD:AF:RAF:SB:SC:PF	0	0	0.0036	0.0035	0	0	0.0031	0	1	1	0	0	0	0	0	0	0	0	0.0034	0
NC_000913.3	1868806	yeaG	NP_416297.1	G	A	57.93	PASS	SN=0;STA=1868805;STO=1868806;TYP=SUB;R1P=108;R1M=95;R2P=99;R2M=107;AD=409;DP=9184;MCOV=-41;PPC=408;AF=0.0445;RAF=0.0000;LS=44970;MQS=24540;MQM=60;BQS=14972;BQM=39;EDS=12819;EDM=74;IDS=404309;IDM=992;CED=601;HMP=0;SB=1.0000;EFF=SYNONYMOUS_CODING(LOW|SILENT|ctG/ctA|L633|644|yeaG|protein_coding|CODING|NP_416297.1|1|1)	GT:DP:AD:AF:RAF:SB:SC:PF	0	0	0	0	0	0	0	0	1	1	0	0.0041	0	0	0	0	0	0.0045	0	0.0048
NC_000913.3	1891523	yoaA	NP_416322.1	T	C	58.16	PASS	SN=0;STA=1891522;STO=1891523;TYP=SUB;R1P=93;R1M=84;R2P=91;R2M=83;AD=351;DP=7208;MCOV=-41;PPC=347;AF=0.0487;RAF=0.0000;LS=40858;MQS=21060;MQM=60;BQS=12771;BQM=39;EDS=11738;EDM=75;IDS=347054;IDM=992;CED=601;HMP=1;SB=0.9998;EFF=SYNONYMOUS_CODING(LOW|SILENT|ccA/ccG|P571|636|yoaA|protein_coding|CODING|NP_416322.1|1|1|WARNING_TRANSCRIPT_NO_START_CODON)	GT:DP:AD:AF:RAF:SB:SC:PF	0	0.0074	0.0068	0	0	0	0	0	1	1	0	0	0	0	0	0	0	0	0	0
NC_000913.3	1973774	cheA	NP_416402.1	T	A	57.73	PASS	SN=0;STA=1973773;STO=1973774;TYP=SUB;R1P=96;R1M=93;R2P=83;R2M=95;AD=367;DP=8339;MCOV=-41;PPC=362;AF=0.0440;RAF=0.0000;LS=40954;MQS=22020;MQM=60;BQS=13545;BQM=39;EDS=11730;EDM=73;IDS=362765;IDM=992;CED=601;HMP=1;SB=0.9999;EFF=SYNONYMOUS_CODING(LOW|SILENT|gtA/gtT|V517|654|cheA|protein_coding|CODING|NP_416402.1|1|1|WARNING_TRANSCRIPT_NO_START_CODON)	GT:DP:AD:AF:RAF:SB:SC:PF	0	0	0	0	0	0	0.0049	0	0.9953	1	0	0	0	0	0	0	0	0	0.005	0
NC_000913.3	2003853	0	0	A	G	58.04	PASS	SN=0;STA=2003852;STO=2003853;TYP=SUB;R1P=122;R1M=114;R2P=104;R2M=115;AD=455;DP=9624;MCOV=-41;PPC=451;AF=0.0473;RAF=0.0000;LS=50824;MQS=27300;MQM=60;BQS=16641;BQM=39;EDS=14701;EDM=75;IDS=449911;IDM=992;CED=601;HMP=1;SB=1.0000;EFF=INTERGENIC(MODIFIER||||||||||1)	GT:DP:AD:AF:RAF:SB:SC:PF	0	0	0	0	0	0	0	0	0.9925	1	0	0	0	0	0	0	0	0	0	0
NC_000913.3	2007055	amyA	NP_416437.1	G	C	48.54	PASS	SN=0;STA=2007054;STO=2007055;TYP=SUB;R1P=84;R1M=96;R2P=103;R2M=105;AD=388;DP=9287;MCOV=-41;PPC=386;AF=0.0418;RAF=0.0000;LS=42808;MQS=23280;MQM=60;BQS=14316;BQM=39;EDS=13035;EDM=75;IDS=383774;IDM=992;CED=601;HMP=3;SB=0.9999;EFF=SYNONYMOUS_CODING(LOW|SILENT|tcG/tcC|S300|495|amyA|protein_coding|CODING|NP_416437.1|1|1)	GT:DP:AD:AF:RAF:SB:SC:PF	0	0	0	0	0	0	0	0	1	1	0	0	0	0	0	0	0	0	0	0
NC_000913.3	2061354	nac	NP_416493.1	C	T	57.77	PASS	SN=0;STA=2061353;STO=2061354;TYP=SUB;R1P=101;R1M=114;R2P=91;R2M=97;AD=403;DP=9972;MCOV=-41;PPC=398;AF=0.0404;RAF=0.0000;LS=44835;MQS=24180;MQM=60;BQS=14882;BQM=39;EDS=12856;EDM=75;IDS=398190;IDM=992;CED=601;HMP=1;SB=0.9998;EFF=NON_SYNONYMOUS_CODING(MODERATE|MISSENSE|Gat/Aat|D194N|305|nac|protein_coding|CODING|NP_416493.1|1|1)	GT:DP:AD:AF:RAF:SB:SC:PF	0	0	0	0	0	0	0	0	0.9916	1	0	0	0	0	0	0	0	0.004	0.004	0
NC_000913.3	2099011	ugd	NP_416532.1	G	T	44.74	PASS	SN=0;STA=2099010;STO=2099011;TYP=SUB;R1P=148;R1M=104;R2P=147;R2M=114;AD=513;DP=12131;MCOV=-41;PPC=509;AF=0.0423;RAF=0.0000;LS=53735;MQS=30780;MQM=60;BQS=18778;BQM=39;EDS=15796;EDM=74;IDS=507091;IDM=992;CED=601;HMP=5;SB=0.9995;EFF=NON_SYNONYMOUS_CODING(MODERATE|MISSENSE|aaC/aaA|N201K|388|ugd|protein_coding|CODING|NP_416532.1|1|1)	GT:DP:AD:AF:RAF:SB:SC:PF	0	0	0	0	0	0	0	0	1	1	0	0	0.0027	0.003	0.0027	0	0	0.0029	0	0
NC_000913.3	2155868	mdtB	NP_416579.1	G	A	58.19	PASS	SN=0;STA=2155867;STO=2155868;TYP=SUB;R1P=75;R1M=80;R2P=83;R2M=67;AD=305;DP=6887;MCOV=-41;PPC=303;AF=0.0443;RAF=0.0000;LS=35740;MQS=18280;MQM=60;BQS=11273;BQM=39;EDS=10320;EDM=75;IDS=301636;IDM=992;CED=601;HMP=1;SB=0.9999;EFF=SYNONYMOUS_CODING(LOW|SILENT|gcG/gcA|A202|1040|mdtB|protein_coding|CODING|NP_416579.1|1|1)	GT:DP:AD:AF:RAF:SB:SC:PF	0	0	0	0.0068	0	0	0	0	1	1	0	0	0	0	0	0	0	0	0	0
NC_000913.3	2156319	mdtB	NP_416579.1	C	G	58.27	PASS	SN=0;STA=2156318;STO=2156319;TYP=SUB;R1P=102;R1M=84;R2P=85;R2M=87;AD=358;DP=8100;MCOV=-41;PPC=352;AF=0.0442;RAF=0.0000;LS=41153;MQS=21480;MQM=60;BQS=13297;BQM=39;EDS=12271;EDM=75;IDS=354183;IDM=992;CED=601;HMP=1;SB=0.9998;EFF=NON_SYNONYMOUS_CODING(MODERATE|MISSENSE|Ctg/Gtg|L353V|1040|mdtB|protein_coding|CODING|NP_416579.1|1|1)	GT:DP:AD:AF:RAF:SB:SC:PF	0	0	0	0	0	0	0	0	1	1	0	0	0	0	0	0	0	0	0	0
NC_000913.3	2159479	mdtC	NP_416580.1	C	A	57.58	PASS	SN=0;STA=2159478;STO=2159479;TYP=SUB;R1P=85;R1M=28;R2P=66;R2M=68;AD=247;DP=4973;MCOV=-41;PPC=244;AF=0.0497;RAF=0.0000;LS=29101;MQS=14820;MQM=60;BQS=9071;BQM=39;EDS=8953;EDM=75;IDS=244196;IDM=992;CED=601;HMP=0;SB=0.9993;EFF=STOP_GAINED(HIGH|NONSENSE|tCg/tAg|S365*|1025|mdtC|protein_coding|CODING|NP_416580.1|1|1|WARNING_TRANSCRIPT_NO_START_CODON)	GT:DP:AD:AF:RAF:SB:SC:PF	0	0	0	0	0	0	0.011	0	0.9912	1	0	0	0	0	0	0	0	0	0	0
NC_000913.3	2225152	yohC	NP_416639.2	C	A	58.05	PASS	SN=0;STA=2225151;STO=2225152;TYP=SUB;R1P=103;R1M=101;R2P=120;R2M=96;AD=420;DP=7872;MCOV=-41;PPC=416;AF=0.0534;RAF=0.0000;LS=46862;MQS=25200;MQM=60;BQS=15514;BQM=39;EDS=13811;EDM=75;IDS=415305;IDM=992;CED=601;HMP=0;SB=0.9998;EFF=NON_SYNONYMOUS_CODING(MODERATE|MISSENSE|gaG/gaT|E160D|195|yohC|protein_coding|CODING|NP_416639.2|1|1)	GT:DP:AD:AF:RAF:SB:SC:PF	0.0058	0	0.005	0.0052	0.0119	0.0059	0.023	0	0.9956	1	0.0061	0	0.01	0	0	0	0.0059	0.0058	0.0097	0
NC_000913.3	2234585	preT	NP_416651.1	G	A	46.72	PASS	SN=0;STA=2234584;STO=2234585;TYP=SUB;R1P=48;R1M=43;R2P=45;R2M=42;AD=178;DP=8404;MCOV=-41;PPC=178;AF=0.0212;RAF=0.0000;LS=24898;MQS=10680;MQM=60;BQS=6702;BQM=39;EDS=7274;EDM=75;IDS=176456;IDM=992;CED=601;HMP=4;SB=0.9998;EFF=NON_SYNONYMOUS_CODING(MODERATE|MISSENSE|Gaa/Aaa|E185K|412|preT|protein_coding|CODING|NP_416651.1|1|1)	GT:DP:AD:AF:RAF:SB:SC:PF	0.0055	0	0	0	0	0	0	0	0	1	0	0	0	0	0.0049	0	0	0.0054	0.0046	0
NC_000913.3	2242968	0	0	G	T	58.1	PASS	SN=0;STA=2242967;STO=2242968;TYP=SUB;R1P=84;R1M=89;R2P=91;R2M=92;AD=356;DP=8419;MCOV=-41;PPC=351;AF=0.0423;RAF=0.0000;LS=39899;MQS=21360;MQM=60;BQS=13203;BQM=39;EDS=11776;EDM=74;IDS=351892;IDM=992;CED=601;HMP=1;SB=0.9999;EFF=INTERGENIC(MODIFIER||||||||||1)	GT:DP:AD:AF:RAF:SB:SC:PF	0.0096	0.0157	0.005	0.0047	0.0063	0.0055	0	0	1	1	0.0052	0	0	0	0.0042	0	0.0052	0.0049	0.0044	0.0088
NC_000913.3	2248040	lysP	NP_416661.1	T	C	57.93	PASS	SN=0;STA=2248039;STO=2248040;TYP=SUB;R1P=42;R1M=45;R2P=47;R2M=35;AD=169;DP=7831;MCOV=-41;PPC=167;AF=0.0216;RAF=0.0000;LS=23629;MQS=10140;MQM=60;BQS=6219;BQM=39;EDS=6672;EDM=75;IDS=167593;IDM=992;CED=601;HMP=0;SB=0.9998;EFF=NON_SYNONYMOUS_CODING(MODERATE|MISSENSE|Acg/Gcg|T165A|489|lysP|protein_coding|CODING|NP_416661.1|1|1)	GT:DP:AD:AF:RAF:SB:SC:PF	0	0	0	0	0	0	0	0	0	1	0	0	0	0	0	0	0	0.0124	0.0047	0
NC_000913.3	2272813	yejA	NP_416682.4	A	T	48.48	PASS	SN=0;STA=2272812;STO=2272813;TYP=SUB;R1P=118;R1M=104;R2P=102;R2M=94;AD=418;DP=9225;MCOV=-41;PPC=416;AF=0.0453;RAF=0.0000;LS=46177;MQS=25062;MQM=60;BQS=15272;BQM=38;EDS=13151;EDM=75;IDS=412845;IDM=992;CED=601;HMP=3;SB=0.9998;EFF=NON_SYNONYMOUS_CODING(MODERATE|MISSENSE|caA/caT|Q150H|604|yejA|protein_coding|CODING|NP_416682.4|1|1)	GT:DP:AD:AF:RAF:SB:SC:PF	0	0	0	0	0	0.0044	0	0	1	1	0.0048	0	0.0045	0	0	0	0	0	0	0
NC_000913.3	2315782	rcsD	NP_416720.1	GT	G	57.96	PASS	SN=0;STA=2315782;STO=2315783;TYP=DEL;R1P=46;R1M=38;R2P=47;R2M=30;AD=161;DP=11344;MCOV=-41;PPC=160;AF=0.0142;RAF=0.0000;LS=22701;MQS=9660;MQM=60;BQS=5996;BQM=39;EDS=6677;EDM=75;IDS=159649;IDM=992;CED=601;HMP=1;SB=0.9995;EFF=FRAME_SHIFT(HIGH||tgc/|C766|890|rcsD|protein_coding|CODING|NP_416720.1|1|1);LOF=(rcsD|b2216|1|1.00)	GT:DP:AD:AF:RAF:SB:SC:PF	0	0	0	0	0	0	0	0	0	1	0	0	0	0	0	0	0	0	0	0
NC_000913.3	2344829	0	0	A	T	46.65	PASS	SN=0;STA=2344828;STO=2344829;TYP=SUB;R1P=35;R1M=43;R2P=45;R2M=46;AD=169;DP=13126;MCOV=-41;PPC=169;AF=0.0129;RAF=0.0000;LS=23699;MQS=10140;MQM=60;BQS=6287;BQM=40;EDS=7105;EDM=75;IDS=167292;IDM=992;CED=601;HMP=4;SB=0.9998;EFF=INTERGENIC(MODIFIER||||||||||1)	GT:DP:AD:AF:RAF:SB:SC:PF	0	0	0	0	0	0	0	0	0	1	0	0	0	0.0029	0	0	0	0	0	0
NC_000913.3	2346385	nrdA	NP_416737.1	G	C	57.38	PASS	SN=0;STA=2346384;STO=2346385;TYP=SUB;R1P=69;R1M=78;R2P=90;R2M=68;AD=305;DP=8108;MCOV=-41;PPC=300;AF=0.0376;RAF=0.0000;LS=34203;MQS=18300;MQM=60;BQS=11325;BQM=39;EDS=9950;EDM=75;IDS=301623;IDM=992;CED=601;HMP=1;SB=0.9998;EFF=SYNONYMOUS_CODING(LOW|SILENT|gcG/gcC|A507|761|nrdA|protein_coding|CODING|NP_416737.1|1|1)	GT:DP:AD:AF:RAF:SB:SC:PF	0	0	0	0	0	0	0	0	1	1	0	0	0	0.0057	0	0	0	0	0	0
NC_000913.3	2347379	0	0	C	A	48.58	PASS	SN=0;STA=2347378;STO=2347379;TYP=SUB;R1P=111;R1M=107;R2P=83;R2M=113;AD=414;DP=9345;MCOV=-41;PPC=408;AF=0.0443;RAF=0.0000;LS=46195;MQS=24840;MQM=60;BQS=15192;BQM=39;EDS=13626;EDM=75;IDS=409211;IDM=992;CED=601;HMP=3;SB=0.9998;EFF=INTERGENIC(MODIFIER||||||||||1)	GT:DP:AD:AF:RAF:SB:SC:PF	0	0	0	0.0046	0	0.0049	0	0	0.9917	1	0	0	0	0	0	0	0	0	0	0.0045
NC_000913.3	2362495	yfaY	NP_416752.1	C	G	50.64	PASS	SN=0;STA=2362494;STO=2362495;TYP=SUB;R1P=74;R1M=104;R2P=88;R2M=99;AD=365;DP=8829;MCOV=-41;PPC=361;AF=0.0413;RAF=0.0000;LS=41465;MQS=21900;MQM=60;BQS=13310;BQM=38;EDS=11740;EDM=74;IDS=360943;IDM=992;CED=601;HMP=2;SB=0.9996;EFF=NON_SYNONYMOUS_CODING(MODERATE|MISSENSE|gGc/gCc|G380A|400|yfaY|protein_coding|CODING|NP_416752.1|1|1)	GT:DP:AD:AF:RAF:SB:SC:PF	0	0	0	0	0.0042	0	0	0	0.995	1	0	0	0	0	0	0	0	0	0.0049	0
NC_000913.3	2362806	yfaY	NP_416752.1	G	A	50.83	PASS	SN=0;STA=2362805;STO=2362806;TYP=SUB;R1P=103;R1M=109;R2P=90;R2M=106;AD=408;DP=8765;MCOV=-41;PPC=405;AF=0.0465;RAF=0.0000;LS=46397;MQS=24480;MQM=60;BQS=15065;BQM=39;EDS=13348;EDM=75;IDS=402218;IDM=992;CED=601;HMP=2;SB=0.9998;EFF=SYNONYMOUS_CODING(LOW|SILENT|ttC/ttT|F276|400|yfaY|protein_coding|CODING|NP_416752.1|1|1)	GT:DP:AD:AF:RAF:SB:SC:PF	0	0.0046	0	0	0	0	0	0	1	1	0.005	0	0	0.0042	0	0	0	0	0	0
NC_000913.3	2440688	fabB	NP_416826.1	G	A	58.24	PASS	SN=0;STA=2440687;STO=2440688;TYP=SUB;R1P=91;R1M=79;R2P=88;R2M=96;AD=354;DP=7596;MCOV=-41;PPC=352;AF=0.0466;RAF=0.0000;LS=40932;MQS=21240;MQM=60;BQS=12940;BQM=39;EDS=11436;EDM=75;IDS=350290;IDM=992;CED=601;HMP=0;SB=1.0000;EFF=SYNONYMOUS_CODING(LOW|SILENT|gaC/gaT|D306|406|fabB|protein_coding|CODING|NP_416826.1|1|1)	GT:DP:AD:AF:RAF:SB:SC:PF	0	0.0061	0	0	0	0	0	0	1	1	0	0	0	0	0	0	0	0	0	0
NC_000913.3	2493766	0	0	A	C	57.75	PASS	SN=0;STA=2493765;STO=2493766;TYP=SUB;R1P=104;R1M=119;R2P=87;R2M=128;AD=438;DP=11370;MCOV=-41;PPC=433;AF=0.0385;RAF=0.0000;LS=46868;MQS=26280;MQM=60;BQS=16163;BQM=39;EDS=13487;EDM=75;IDS=432811;IDM=992;CED=601;HMP=1;SB=0.9995;EFF=INTERGENIC(MODIFIER||||||||||1)	GT:DP:AD:AF:RAF:SB:SC:PF	0	0	0.0029	0	0	0	0.0029	0	1	1	0	0	0	0	0	0	0	0	0	0
NC_000913.3	2543019	cysP	NP_416920.1	A	T	44.69	PASS	SN=0;STA=2543018;STO=2543019;TYP=SUB;R1P=80;R1M=100;R2P=113;R2M=93;AD=386;DP=8437;MCOV=-41;PPC=382;AF=0.0458;RAF=0.0000;LS=43516;MQS=23160;MQM=60;BQS=14156;BQM=39;EDS=12618;EDM=75;IDS=380959;IDM=992;CED=601;HMP=5;SB=1.0000;EFF=NON_SYNONYMOUS_CODING(MODERATE|MISSENSE|gaT/gaA|D170E|338|cysP|protein_coding|CODING|NP_416920.1|1|1)	GT:DP:AD:AF:RAF:SB:SC:PF	0	0	0	0	0	0	0	0	1	1	0	0	0	0	0	0	0	0	0	0
NC_000913.3	2565619	eutA	NP_416946.1	GC	G	58.18	PASS	SN=0;STA=2565619;STO=2565620;TYP=DEL;R1P=86;R1M=84;R2P=74;R2M=85;AD=329;DP=7075;MCOV=-41;PPC=326;AF=0.0465;RAF=0.0000;LS=38258;MQS=19740;MQM=60;BQS=11955;BQM=39;EDS=11399;EDM=75;IDS=325375;IDM=992;CED=601;HMP=1;SB=0.9999;EFF=FRAME_SHIFT(HIGH||cgc/|R422|467|eutA|protein_coding|CODING|NP_416946.1|1|1|WARNING_TRANSCRIPT_NO_START_CODON);LOF=(eutA|b2451|1|1.00)	GT:DP:AD:AF:RAF:SB:SC:PF	0	0	0	0	0	0	0	0	0.9759	1	0	0	0	0	0	0	0	0	0	0
NC_000913.3	2598566	bamC	NP_416972.4	C	A	57.82	PASS	SN=0;STA=2598565;STO=2598566;TYP=SUB;R1P=100;R1M=83;R2P=84;R2M=76;AD=343;DP=7120;MCOV=-41;PPC=340;AF=0.0482;RAF=0.0000;LS=38957;MQS=20569;MQM=60;BQS=12639;BQM=39;EDS=10986;EDM=75;IDS=339215;IDM=992;CED=601;HMP=0;SB=0.9997;EFF=SYNONYMOUS_CODING(LOW|SILENT|acG/acT|T100|344|bamC|protein_coding|CODING|NP_416972.4|1|1)	GT:DP:AD:AF:RAF:SB:SC:PF	0	0	0	0.0126	0	0.0139	0.0057	0	0.9943	1	0	0	0.006	0	0	0	0	0	0.0109	0.0056
NC_000913.3	2617696	yfgD	NP_416990.1	C	T	58.08	PASS	SN=0;STA=2617695;STO=2617696;TYP=SUB;R1P=101;R1M=115;R2P=90;R2M=111;AD=417;DP=9288;MCOV=-41;PPC=414;AF=0.0449;RAF=0.0000;LS=46313;MQS=25020;MQM=60;BQS=15275;BQM=39;EDS=13342;EDM=75;IDS=412181;IDM=992;CED=601;HMP=0;SB=0.9997;EFF=NON_SYNONYMOUS_CODING(MODERATE|MISSENSE|gCc/gTc|A40V|119|yfgD|protein_coding|CODING|NP_416990.1|1|1)	GT:DP:AD:AF:RAF:SB:SC:PF	0	0	0	0	0	0.0045	0	0	1	1	0	0	0.0047	0	0	0	0	0	0	0.004
NC_000913.3	2622922	0	0	C	T	57.56	PASS	SN=0;STA=2622921;STO=2622922;TYP=SUB;R1P=99;R1M=110;R2P=106;R2M=95;AD=410;DP=9302;MCOV=-41;PPC=406;AF=0.0441;RAF=0.0000;LS=45666;MQS=24600;MQM=60;BQS=15070;BQM=39;EDS=12999;EDM=73;IDS=405482;IDM=992;CED=601;HMP=0;SB=1.0000;EFF=INTERGENIC(MODIFIER||||||||||1)	GT:DP:AD:AF:RAF:SB:SC:PF	0	0	0.0046	0	0	0.0048	0.0039	0	1	1	0	0	0	0	0	0	0	0	0	0
NC_000913.3	2660209	iscU	NP_417024.1	G	A	58.43	PASS	SN=0;STA=2660208;STO=2660209;TYP=SUB;R1P=70;R1M=97;R2P=105;R2M=101;AD=373;DP=9197;MCOV=-41;PPC=373;AF=0.0406;RAF=0.0000;LS=41924;MQS=22369;MQM=60;BQS=13822;BQM=39;EDS=12903;EDM=75;IDS=368561;IDM=992;CED=601;HMP=1;SB=0.9998;EFF=SYNONYMOUS_CODING(LOW|SILENT|gtC/gtT|V27|128|iscU|protein_coding|CODING|NP_417024.1|1|1)	GT:DP:AD:AF:RAF:SB:SC:PF	0	0	0.0041	0	0	0.0044	0	0	1	1	0	0	0	0.0128	0	0	0	0	0	0
NC_000913.3	2686851	hmp	NP_417047.1	CG	C	57.95	PASS	SN=0;STA=2686851;STO=2686852;TYP=DEL;R1P=22;R1M=46;R2P=40;R2M=35;AD=143;DP=8508;MCOV=-41;PPC=143;AF=0.0168;RAF=0.0000;LS=20163;MQS=8580;MQM=60;BQS=5415;BQM=39;EDS=5810;EDM=75;IDS=141800;IDM=992;CED=601;HMP=1;SB=0.9995;EFF=FRAME_SHIFT(HIGH||gaa/|E340|396|hmp|protein_coding|CODING|NP_417047.1|1|1);LOF=(hmp|b2552|1|1.00)	GT:DP:AD:AF:RAF:SB:SC:PF	0	0	0	0	0	0	0	0	0	1	0	0	0	0	0	0	0	0	0	0
NC_000913.3	2688665	glrR	NP_417049.1	G	A	57.49	PASS	SN=0;STA=2688664;STO=2688665;TYP=SUB;R1P=109;R1M=92;R2P=102;R2M=75;AD=378;DP=7628;MCOV=-41;PPC=372;AF=0.0496;RAF=0.0000;LS=42812;MQS=22680;MQM=60;BQS=13936;BQM=39;EDS=11256;EDM=74;IDS=373868;IDM=992;CED=601;HMP=1;SB=0.9996;EFF=NON_SYNONYMOUS_CODING(MODERATE|MISSENSE|Cgc/Tgc|R47C|444|glrR|protein_coding|CODING|NP_417049.1|1|1)	GT:DP:AD:AF:RAF:SB:SC:PF	0	0	0	0	0	0	0	0	1	1	0	0	0	0	0	0	0.0053	0	0	0
NC_000913.3	2723690	pssA	NP_417080.4	T	C	58.01	PASS	SN=0;STA=2723689;STO=2723690;TYP=SUB;R1P=127;R1M=110;R2P=88;R2M=87;AD=412;DP=10941;MCOV=-41;PPC=408;AF=0.0377;RAF=0.0000;LS=44826;MQS=24720;MQM=60;BQS=15290;BQM=39;EDS=13562;EDM=75;IDS=407348;IDM=992;CED=601;HMP=0;SB=0.9998;EFF=NON_SYNONYMOUS_CODING(MODERATE|MISSENSE|Tat/Cat|Y322H|451|pssA|protein_coding|CODING|NP_417080.4|1|1)	GT:DP:AD:AF:RAF:SB:SC:PF	0	0	0	0	0	0	0	0	0.9925	1	0	0	0	0	0	0	0	0	0	0
NC_000913.3	2732626	clpB	NP_417083.1	T	C	57.36	PASS	SN=0;STA=2732625;STO=2732626;TYP=SUB;R1P=112;R1M=95;R2P=85;R2M=91;AD=383;DP=8677;MCOV=-41;PPC=380;AF=0.0441;RAF=0.0000;LS=42773;MQS=22980;MQM=60;BQS=13902;BQM=38;EDS=12269;EDM=74;IDS=378626;IDM=992;CED=601;HMP=0;SB=0.9999;EFF=SYNONYMOUS_CODING(LOW|SILENT|gcA/gcG|A516|857|clpB|protein_coding|CODING|NP_417083.1|1|1)	GT:DP:AD:AF:RAF:SB:SC:PF	0	0	0	0	0	0	0	0	1	1	0	0	0	0	0	0	0	0.0044	0	0
NC_000913.3	2744168	0	0	C	T	58.09	PASS	SN=0;STA=2744167;STO=2744168;TYP=SUB;R1P=35;R1M=51;R2P=29;R2M=44;AD=159;DP=9014;MCOV=-41;PPC=159;AF=0.0176;RAF=0.0000;LS=22219;MQS=9540;MQM=60;BQS=5990;BQM=39;EDS=6370;EDM=74;IDS=157475;IDM=992;CED=601;HMP=1;SB=0.9993;EFF=INTERGENIC(MODIFIER||||||||||1)	GT:DP:AD:AF:RAF:SB:SC:PF	0	0	0.0042	0	0	0	0.0044	0	0.0036	1	0	0	0	0	0	0	0	0	0	0
NC_000913.3	2747197	ffh	NP_417101.1	G	A	57.51	PASS	SN=0;STA=2747196;STO=2747197;TYP=SUB;R1P=93;R1M=81;R2P=78;R2M=105;AD=357;DP=7964;MCOV=-41;PPC=353;AF=0.0448;RAF=0.0000;LS=40537;MQS=21420;MQM=60;BQS=13162;BQM=39;EDS=11124;EDM=75;IDS=350602;IDM=992;CED=601;HMP=0;SB=0.9998;EFF=NON_SYNONYMOUS_CODING(MODERATE|MISSENSE|gCg/gTg|A200V|453|ffh|protein_coding|CODING|NP_417101.1|1|1)	GT:DP:AD:AF:RAF:SB:SC:PF	0	0	0	0	0	0	0.006	0	0.9897	1	0	0	0	0	0.0056	0	0	0	0	0
NC_000913.3	2755733	0	0	C	A	58.36	PASS	SN=0;STA=2755732;STO=2755733;TYP=SUB;R1P=118;R1M=118;R2P=115;R2M=116;AD=467;DP=10175;MCOV=-41;PPC=466;AF=0.0459;RAF=0.0000;LS=50867;MQS=28020;MQM=60;BQS=17145;BQM=39;EDS=15358;EDM=75;IDS=461643;IDM=992;CED=601;HMP=0;SB=1.0000;EFF=INTERGENIC(MODIFIER||||||||||1)	GT:DP:AD:AF:RAF:SB:SC:PF	0.0036	0	0.0083	0	0.0037	0	0	0	0.9931	1	0.0039	0.0042	0.0039	0.0043	0	0	0.0041	0.008	0	0
NC_000913.3	2775004	yfjW	NP_417129.1	G	A	46.72	PASS	SN=0;STA=2775003;STO=2775004;TYP=SUB;R1P=143;R1M=201;R2P=137;R2M=221;AD=702;DP=16819;MCOV=-41;PPC=698;AF=0.0417;RAF=0.0000;LS=72649;MQS=42104;MQM=60;BQS=26421;BQM=40;EDS=21595;EDM=75;IDS=693801;IDM=992;CED=601;HMP=4;SB=0.9993;EFF=NON_SYNONYMOUS_CODING(MODERATE|MISSENSE|Gaa/Aaa|E563K|567|yfjW|protein_coding|CODING|NP_417129.1|1|1)	GT:DP:AD:AF:RAF:SB:SC:PF	0	0	0	0	0.0018	0	0	0	0.9942	1	0.0018	0	0	0.0019	0	0	0.0023	0	0	0.0039
NC_000913.3	2782790	0	0	A	T	58.04	PASS	SN=0;STA=2782789;STO=2782790;TYP=SUB;R1P=130;R1M=103;R2P=97;R2M=113;AD=443;DP=10606;MCOV=-41;PPC=441;AF=0.0418;RAF=0.0000;LS=47769;MQS=26580;MQM=60;BQS=16512;BQM=39;EDS=13690;EDM=75;IDS=437970;IDM=992;CED=601;HMP=1;SB=0.9999;EFF=INTERGENIC(MODIFIER||||||||||1)	GT:DP:AD:AF:RAF:SB:SC:PF	0	0	0	0	0	0	0	0	1	1	0	0	0	0	0	0	0	0	0	0
NC_000913.3	2786961	ygaQ	b4462	C	T	58.39	PASS	SN=0;STA=2786960;STO=2786961;TYP=SUB;R1P=160;R1M=142;R2P=158;R2M=147;AD=607;DP=14582;MCOV=-41;PPC=603;AF=0.0416;RAF=0.0000;LS=63768;MQS=36396;MQM=60;BQS=22653;BQM=40;EDS=18854;EDM=74;IDS=599998;IDM=992;CED=601;HMP=0;SB=0.9998;EFF=NON_SYNONYMOUS_CODING(MODERATE|MISSENSE|Cat/Tat|H189Y|750|ygaQ|protein_coding|CODING|b4462|1|1|WARNING_TRANSCRIPT_MULTIPLE_STOP_CODONS)	GT:DP:AD:AF:RAF:SB:SC:PF	0	0	0.0022	0	0	0	0	0	0.9977	1	0	0	0	0	0	0	0	0	0	0
NC_000913.3	2795672	0	0	C	A	58.23	PASS	SN=0;STA=2795671;STO=2795672;TYP=SUB;R1P=103;R1M=102;R2P=80;R2M=117;AD=402;DP=9678;MCOV=-41;PPC=395;AF=0.0415;RAF=0.0000;LS=44614;MQS=24120;MQM=60;BQS=15097;BQM=39;EDS=12956;EDM=75;IDS=397676;IDM=992;CED=601;HMP=1;SB=0.9997;EFF=INTERGENIC(MODIFIER||||||||||1)	GT:DP:AD:AF:RAF:SB:SC:PF	0	0	0	0	0	0	0.0047	0	0.9958	1	0	0	0	0	0	0	0	0	0	0
NC_000913.3	2915223	barA	NP_417266.1	C	T	58.49	PASS	SN=0;STA=2915222;STO=2915223;TYP=SUB;R1P=113;R1M=97;R2P=121;R2M=115;AD=446;DP=9993;MCOV=-41;PPC=440;AF=0.0446;RAF=0.0000;LS=49653;MQS=26760;MQM=60;BQS=16521;BQM=39;EDS=13938;EDM=75;IDS=441003;IDM=992;CED=601;HMP=1;SB=0.9998;EFF=NON_SYNONYMOUS_CODING(MODERATE|MISSENSE|aCt/aTt|T56I|918|barA|protein_coding|CODING|NP_417266.1|1|1)	GT:DP:AD:AF:RAF:SB:SC:PF	0.0036	0	0.0078	0	0.0036	0	0	0	1	1	0	0	0	0	0.004	0	0	0	0	0
NC_000913.3	2917495	barA	NP_417266.1	A	G	58.06	PASS	SN=0;STA=2917494;STO=2917495;TYP=SUB;R1P=108;R1M=89;R2P=136;R2M=95;AD=428;DP=9476;MCOV=-41;PPC=423;AF=0.0452;RAF=0.0000;LS=46941;MQS=25656;MQM=60;BQS=15579;BQM=38;EDS=14006;EDM=75;IDS=423017;IDM=992;CED=601;HMP=0;SB=0.9995;EFF=SYNONYMOUS_CODING(LOW|SILENT|caA/caG|Q813|918|barA|protein_coding|CODING|NP_417266.1|1|1)	GT:DP:AD:AF:RAF:SB:SC:PF	0	0	0	0	0.0042	0	0	0	0.9962	1	0.0043	0	0	0	0	0	0	0	0	0
NC_000913.3	2959302	recC	NP_417299.1	C	T	57.82	PASS	SN=0;STA=2959301;STO=2959302;TYP=SUB;R1P=31;R1M=35;R2P=42;R2M=44;AD=152;DP=8893;MCOV=-41;PPC=152;AF=0.0171;RAF=0.0000;LS=21223;MQS=9120;MQM=60;BQS=5549;BQM=39;EDS=6329;EDM=75;IDS=150475;IDM=992;CED=601;HMP=0;SB=0.9998;EFF=NON_SYNONYMOUS_CODING(MODERATE|MISSENSE|Ggc/Agc|G1043S|1122|recC|protein_coding|CODING|NP_417299.1|1|1)	GT:DP:AD:AF:RAF:SB:SC:PF	0	0	0	0	0	0	0	0	0.0048	1	0	0	0.0045	0	0	0	0	0	0	0
NC_000913.3	2969233	0	0	T	C	58.12	PASS	SN=0;STA=2969232;STO=2969233;TYP=SUB;R1P=141;R1M=131;R2P=138;R2M=129;AD=539;DP=12909;MCOV=-41;PPC=531;AF=0.0418;RAF=0.0000;LS=57333;MQS=32340;MQM=60;BQS=20183;BQM=39;EDS=16885;EDM=75;IDS=533044;IDM=992;CED=601;HMP=0;SB=0.9999;EFF=INTERGENIC(MODIFIER||||||||||1)	GT:DP:AD:AF:RAF:SB:SC:PF	0	0	0	0	0	0.0026	0	0	0.992	1	0	0	0.0029	0	0	0	0	0	0	0
NC_000913.3	2969969	mutH	NP_417308.1	A	G	57.86	PASS	SN=0;STA=2969968;STO=2969969;TYP=SUB;R1P=40;R1M=38;R2P=35;R2M=29;AD=142;DP=8840;MCOV=-41;PPC=142;AF=0.0161;RAF=0.0000;LS=19792;MQS=8520;MQM=60;BQS=5238;BQM=38;EDS=5964;EDM=74;IDS=140792;IDM=992;CED=601;HMP=0;SB=0.9998;EFF=NON_SYNONYMOUS_CODING(MODERATE|MISSENSE|aAt/aGt|N103S|229|mutH|protein_coding|CODING|NP_417308.1|1|1)	GT:DP:AD:AF:RAF:SB:SC:PF	0	0	0	0	0.0043	0.0047	0	0	0	1	0	0	0	0	0	0	0	0	0	0
NC_000913.3	2988287	0	0	G	A	46.45	PASS	SN=0;STA=2988286;STO=2988287;TYP=SUB;R1P=153;R1M=165;R2P=121;R2M=159;AD=598;DP=15183;MCOV=-41;PPC=594;AF=0.0394;RAF=0.0000;LS=62618;MQS=35867;MQM=60;BQS=21955;BQM=38;EDS=18600;EDM=75;IDS=590863;IDM=992;CED=601;HMP=4;SB=0.9997;EFF=INTERGENIC(MODIFIER||||||||||1)	GT:DP:AD:AF:RAF:SB:SC:PF	0	0	0	0.0021	0	0	0.0044	0	0.9977	1	0.002	0	0	0	0	0	0	0	0	0.0024
NC_000913.3	3021941	xdhD	NP_417357.1	C	T	58.5	PASS	SN=0;STA=3021940;STO=3021941;TYP=SUB;R1P=95;R1M=101;R2P=102;R2M=92;AD=390;DP=8804;MCOV=-41;PPC=385;AF=0.0443;RAF=0.0000;LS=43950;MQS=23400;MQM=60;BQS=14523;BQM=39;EDS=13334;EDM=75;IDS=385764;IDM=992;CED=601;HMP=0;SB=1.0000;EFF=NON_SYNONYMOUS_CODING(MODERATE|MISSENSE|cCa/cTa|P209L|956|xdhD|protein_coding|CODING|NP_417357.1|1|1)	GT:DP:AD:AF:RAF:SB:SC:PF	0	0	0	0	0	0	0	0	1	1	0	0	0	0	0	0	0	0	0	0
NC_000913.3	3025290	xanQ	NP_417358.2	G	C	57.6	PASS	SN=0;STA=3025289;STO=3025290;TYP=SUB;R1P=43;R1M=53;R2P=22;R2M=32;AD=150;DP=8975;MCOV=-41;PPC=146;AF=0.0167;RAF=0.0000;LS=21099;MQS=9000;MQM=60;BQS=5524;BQM=38;EDS=6391;EDM=75;IDS=148667;IDM=992;CED=601;HMP=0;SB=0.9995;EFF=NON_SYNONYMOUS_CODING(MODERATE|MISSENSE|Gtc/Ctc|V314L|466|xanQ|protein_coding|CODING|NP_417358.2|1|1)	GT:DP:AD:AF:RAF:SB:SC:PF	0	0	0	0	0	0	0	0	0	1	0	0	0	0	0	0	0	0	0	0
NC_000913.3	3027238	ghxQ	YP_026186.1	A	G	57.4	PASS	SN=0;STA=3027237;STO=3027238;TYP=SUB;R1P=97;R1M=111;R2P=82;R2M=102;AD=392;DP=8896;MCOV=-41;PPC=388;AF=0.0441;RAF=0.0000;LS=43830;MQS=23520;MQM=60;BQS=14189;BQM=39;EDS=12382;EDM=75;IDS=387589;IDM=992;CED=601;HMP=0;SB=0.9997;EFF=NON_SYNONYMOUS_CODING(MODERATE|MISSENSE|Acg/Gcg|T40A|455|ghxQ|protein_coding|CODING|YP_026186.1|1|1)	GT:DP:AD:AF:RAF:SB:SC:PF	0	0	0.0046	0	0	0	0	0	0.9956	1	0	0	0	0	0	0	0	0	0	0
NC_000913.3	3036602	recJ	NP_417368.1	C	T	57.97	PASS	SN=0;STA=3036601;STO=3036602;TYP=SUB;R1P=98;R1M=104;R2P=66;R2M=74;AD=342;DP=7054;MCOV=-41;PPC=342;AF=0.0485;RAF=0.0000;LS=38717;MQS=20520;MQM=60;BQS=12481;BQM=39;EDS=11684;EDM=74;IDS=338225;IDM=992;CED=601;HMP=0;SB=0.9998;EFF=NON_SYNONYMOUS_CODING(MODERATE|MISSENSE|gGt/gAt|G502D|577|recJ|protein_coding|CODING|NP_417368.1|1|1|WARNING_TRANSCRIPT_NO_START_CODON)	GT:DP:AD:AF:RAF:SB:SC:PF	0	0	0	0	0	0	0	0	1	1	0	0	0	0	0	0	0	0	0	0.0058
NC_000913.3	3055374	ygfB	NP_417385.4	AG	A	57.73	PASS	SN=0;STA=3055374;STO=3055375;TYP=DEL;R1P=91;R1M=98;R2P=82;R2M=90;AD=361;DP=10054;MCOV=-41;PPC=354;AF=0.0359;RAF=0.0000;LS=40625;MQS=21660;MQM=60;BQS=13262;BQM=39;EDS=12202;EDM=75;IDS=357123;IDM=992;CED=601;HMP=1;SB=0.9998;EFF=FRAME_SHIFT(HIGH||ctg/|L24|192|ygfB|protein_coding|CODING|NP_417385.4|1|1);LOF=(ygfB|b2909|1|1.00)	GT:DP:AD:AF:RAF:SB:SC:PF	0	0	0	0	0	0	0	0	0.9903	1	0	0	0	0	0	0	0	0	0	0
NC_000913.3	3105107	mltC	NP_417438.2	C	T	56.9	PASS	SN=0;STA=3105106;STO=3105107;TYP=SUB;R1P=96;R1M=97;R2P=84;R2M=104;AD=381;DP=9423;MCOV=-41;PPC=379;AF=0.0404;RAF=0.0000;LS=42271;MQS=22860;MQM=60;BQS=13963;BQM=38;EDS=11930;EDM=75;IDS=373932;IDM=992;CED=601;HMP=1;SB=0.9998;EFF=SYNONYMOUS_CODING(LOW|SILENT|gtC/gtT|V225|359|mltC|protein_coding|CODING|NP_417438.2|1|1)	GT:DP:AD:AF:RAF:SB:SC:PF	0	0	0	0	0	0	0.0044	0	1	1	0	0	0.0042	0	0	0	0	0	0	0
NC_000913.3	3124012	glcG	NP_417451.1	C	T	57.3	PASS	SN=0;STA=3124011;STO=3124012;TYP=SUB;R1P=78;R1M=62;R2P=81;R2M=83;AD=304;DP=7575;MCOV=-41;PPC=302;AF=0.0401;RAF=0.0000;LS=35001;MQS=18240;MQM=60;BQS=11135;BQM=39;EDS=9680;EDM=75;IDS=300578;IDM=992;CED=601;HMP=0;SB=0.9998;EFF=NON_SYNONYMOUS_CODING(MODERATE|MISSENSE|Ggc/Agc|G74S|134|glcG|protein_coding|CODING|NP_417451.1|1|1)	GT:DP:AD:AF:RAF:SB:SC:PF	0	0	0	0	0.0058	0	0	0	1	1	0	0	0	0	0	0	0	0	0	0
NC_000913.3	3146303	0	0	T	A	58.13	PASS	SN=0;STA=3146302;STO=3146303;TYP=SUB;R1P=130;R1M=109;R2P=110;R2M=109;AD=458;DP=11000;MCOV=-41;PPC=454;AF=0.0416;RAF=0.0000;LS=49771;MQS=27480;MQM=60;BQS=17083;BQM=39;EDS=14846;EDM=74;IDS=452705;IDM=992;CED=601;HMP=0;SB=0.9998;EFF=INTERGENIC(MODIFIER||||||||||1)	GT:DP:AD:AF:RAF:SB:SC:PF	0	0	0	0	0	0	0	0	0.9933	1	0	0	0	0	0	0	0	0.0037	0	0
NC_000913.3	3147788	0	0	AT	A	43.47	PASS	SN=0;STA=3147788;STO=3147789;TYP=DEL;R1P=91;R1M=105;R2P=87;R2M=108;AD=391;DP=9934;MCOV=-41;PPC=388;AF=0.0394;RAF=0.0000;LS=44266;MQS=23460;MQM=60;BQS=14390;BQM=39;EDS=13254;EDM=75;IDS=386799;IDM=992;CED=601;HMP=6;SB=0.9997;EFF=INTERGENIC(MODIFIER||||||||||1)	GT:DP:AD:AF:RAF:SB:SC:PF	0	0	0.004	0	0.0039	0	0	0	0.9907	1	0	0	0	0	0.004	0	0	0	0	0
NC_000913.3	3149408	yqhA	NP_417475.1	C	T	58.5	PASS	SN=0;STA=3149407;STO=3149408;TYP=SUB;R1P=95;R1M=128;R2P=115;R2M=118;AD=456;DP=10862;MCOV=-41;PPC=452;AF=0.0420;RAF=0.0000;LS=49843;MQS=27360;MQM=60;BQS=16770;BQM=39;EDS=15336;EDM=73;IDS=450658;IDM=992;CED=601;HMP=0;SB=0.9997;EFF=NON_SYNONYMOUS_CODING(MODERATE|MISSENSE|Ggc/Agc|G22S|164|yqhA|protein_coding|CODING|NP_417475.1|1|1)	GT:DP:AD:AF:RAF:SB:SC:PF	0	0	0	0	0	0	0.0038	0	1	1	0	0	0.0041	0	0	0	0	0.0072	0	0
NC_000913.3	3224365	ebgA	YP_026199.1	T	C	57.94	PASS	SN=0;STA=3224364;STO=3224365;TYP=SUB;R1P=72;R1M=118;R2P=112;R2M=89;AD=391;DP=8668;MCOV=-41;PPC=385;AF=0.0451;RAF=0.0000;LS=44853;MQS=23460;MQM=60;BQS=14560;BQM=39;EDS=12299;EDM=75;IDS=386602;IDM=992;CED=601;HMP=1;SB=0.9998;EFF=NON_SYNONYMOUS_CODING(MODERATE|MISSENSE|cTt/cCt|L578P|1030|ebgA|protein_coding|CODING|YP_026199.1|1|1)	GT:DP:AD:AF:RAF:SB:SC:PF	0	0	0	0	0	0	0	0	1	1	0	0	0.0059	0	0	0	0	0.0053	0	0
NC_000913.3	3256962	yhaO	YP_026203.3	AT	A	57.87	PASS	SN=0;STA=3256962;STO=3256963;TYP=DEL;R1P=92;R1M=95;R2P=91;R2M=80;AD=358;DP=8592;MCOV=-41;PPC=355;AF=0.0417;RAF=0.0000;LS=40317;MQS=21480;MQM=60;BQS=13060;BQM=39;EDS=11733;EDM=75;IDS=353979;IDM=992;CED=601;HMP=1;SB=0.9999;EFF=FRAME_SHIFT(HIGH||atc/|I350|443|yhaO|protein_coding|CODING|YP_026203.3|1|1);LOF=(yhaO|b3110|1|1.00)	GT:DP:AD:AF:RAF:SB:SC:PF	0	0	0	0	0	0	0	0	1	1	0	0	0	0	0	0	0	0	0	0
NC_000913.3	3258414	tdcG	YP_026204.1	GC	G	57.91	PASS	SN=0;STA=3258414;STO=3258415;TYP=DEL;R1P=78;R1M=108;R2P=68;R2M=119;AD=373;DP=8877;MCOV=-41;PPC=368;AF=0.0420;RAF=0.0000;LS=42210;MQS=22355;MQM=60;BQS=13556;BQM=38;EDS=12984;EDM=75;IDS=368786;IDM=992;CED=601;HMP=1;SB=0.9993;EFF=FRAME_SHIFT(HIGH||cgc/|R412|454|tdcG|protein_coding|CODING|YP_026204.1|1|1);LOF=(tdcG|b4471|1|1.00)	GT:DP:AD:AF:RAF:SB:SC:PF	0	0	0	0	0	0	0	0	0.9951	1	0	0	0	0	0	0	0	0	0	0
NC_000913.3	3345542	rpoN	NP_417669.1	G	T	48.37	PASS	SN=0;STA=3345541;STO=3345542;TYP=SUB;R1P=35;R1M=40;R2P=40;R2M=24;AD=139;DP=8470;MCOV=-41;PPC=139;AF=0.0164;RAF=0.0000;LS=19352;MQS=8340;MQM=60;BQS=5288;BQM=39;EDS=5360;EDM=74;IDS=137770;IDM=992;CED=601;HMP=3;SB=0.9997;EFF=NON_SYNONYMOUS_CODING(MODERATE|MISSENSE|Gtg/Ttg|V276L|477|rpoN|protein_coding|CODING|NP_417669.1|1|1)	GT:DP:AD:AF:RAF:SB:SC:PF	0	0	0	0.0052	0	0	0.005	0	0	1	0	0	0	0	0	0	0	0	0	0
NC_000913.3	3356914	gltB	NP_417679.2	G	A	58.01	PASS	SN=0;STA=3356913;STO=3356914;TYP=SUB;R1P=93;R1M=87;R2P=98;R2M=77;AD=355;DP=7999;MCOV=-41;PPC=351;AF=0.0444;RAF=0.0000;LS=39981;MQS=21300;MQM=60;BQS=13140;BQM=39;EDS=11869;EDM=74;IDS=350764;IDM=992;CED=601;HMP=0;SB=0.9997;EFF=SYNONYMOUS_CODING(LOW|SILENT|ctG/ctA|L730|1486|gltB|protein_coding|CODING|NP_417679.2|1|1)	GT:DP:AD:AF:RAF:SB:SC:PF	0	0	0	0	0	0	0	0	1	1	0.0109	0	0	0	0	0	0	0	0	0.0047
NC_000913.3	3386185	0	0	C	A	57.97	PASS	SN=0;STA=3386184;STO=3386185;TYP=SUB;R1P=54;R1M=38;R2P=58;R2M=42;AD=192;DP=9689;MCOV=-41;PPC=191;AF=0.0198;RAF=0.0000;LS=26510;MQS=11520;MQM=60;BQS=7107;BQM=39;EDS=7613;EDM=75;IDS=190069;IDM=992;CED=601;HMP=1;SB=0.9994;EFF=INTERGENIC(MODIFIER||||||||||1)	GT:DP:AD:AF:RAF:SB:SC:PF	0.004	0	0	0	0	0.0043	0.008	0	0.0037	1	0.0041	0	0	0	0.0039	0	0	0	0.004	0
NC_000913.3	3397875	yhdE	NP_417714.1	G	A	58.25	PASS	SN=0;STA=3397874;STO=3397875;TYP=SUB;R1P=110;R1M=104;R2P=118;R2M=86;AD=418;DP=8989;MCOV=-41;PPC=409;AF=0.0465;RAF=0.0000;LS=46733;MQS=25080;MQM=60;BQS=15272;BQM=39;EDS=14080;EDM=75;IDS=413274;IDM=992;CED=601;HMP=0;SB=0.9997;EFF=SYNONYMOUS_CODING(LOW|SILENT|caC/caT|H168|197|yhdE|protein_coding|CODING|NP_417714.1|1|1)	GT:DP:AD:AF:RAF:SB:SC:PF	0	0	0	0	0	0	0.0047	0	0.9958	1	0.0046	0	0	0	0	0	0	0	0	0.0048
NC_000913.3	3417870	acrF	NP_417732.1	G	A	58.5	PASS	SN=0;STA=3417869;STO=3417870;TYP=SUB;R1P=60;R1M=47;R2P=52;R2M=37;AD=196;DP=10867;MCOV=-41;PPC=196;AF=0.0180;RAF=0.0000;LS=27536;MQS=11760;MQM=60;BQS=7349;BQM=39;EDS=7786;EDM=74;IDS=194261;IDM=992;CED=601;HMP=1;SB=0.9995;EFF=SYNONYMOUS_CODING(LOW|SILENT|gaG/gaA|E946|1034|acrF|protein_coding|CODING|NP_417732.1|1|1)	GT:DP:AD:AF:RAF:SB:SC:PF	0	0	0	0	0	0	0	0	0	1	0	0	0	0	0	0	0	0	0	0
NC_000913.3	3467420	chiA	NP_417797.1	C	A	58.13	PASS	SN=0;STA=3467419;STO=3467420;TYP=SUB;R1P=85;R1M=124;R2P=102;R2M=90;AD=401;DP=10112;MCOV=-41;PPC=397;AF=0.0397;RAF=0.0000;LS=43737;MQS=24060;MQM=60;BQS=15027;BQM=39;EDS=12984;EDM=75;IDS=396655;IDM=992;CED=601;HMP=0;SB=0.9997;EFF=NON_SYNONYMOUS_CODING(MODERATE|MISSENSE|Gat/Tat|D812Y|897|chiA|protein_coding|CODING|NP_417797.1|1|1)	GT:DP:AD:AF:RAF:SB:SC:PF	0	0	0	0	0	0	0.0032	0	1	1	0	0	0	0	0	0	0	0	0.0067	0
NC_000913.3	3487862	yhfK	NP_417817.2	A	T	57.62	PASS	SN=0;STA=3487861;STO=3487862;TYP=SUB;R1P=32;R1M=40;R2P=48;R2M=31;AD=151;DP=8402;MCOV=-41;PPC=151;AF=0.0180;RAF=0.0000;LS=21091;MQS=9060;MQM=60;BQS=5554;BQM=39;EDS=5629;EDM=74;IDS=149627;IDM=992;CED=601;HMP=0;SB=0.9998;EFF=STOP_GAINED(HIGH|NONSENSE|Aaa/Taa|K358*|700|yhfK|protein_coding|CODING|NP_417817.2|1|1)	GT:DP:AD:AF:RAF:SB:SC:PF	0	0	0	0	0	0	0	0	0	1	0	0	0	0	0	0	0	0.0047	0	0
NC_000913.3	3573451	glgB	NP_417890.1	A	G	58.13	PASS	SN=0;STA=3573450;STO=3573451;TYP=SUB;R1P=98;R1M=89;R2P=111;R2M=72;AD=370;DP=7612;MCOV=-41;PPC=367;AF=0.0486;RAF=0.0000;LS=41914;MQS=22200;MQM=60;BQS=13556;BQM=39;EDS=12302;EDM=75;IDS=365829;IDM=992;CED=601;HMP=0;SB=0.9995;EFF=NON_SYNONYMOUS_CODING(MODERATE|MISSENSE|Ttt/Ctt|F18L|728|glgB|protein_coding|CODING|NP_417890.1|1|1)	GT:DP:AD:AF:RAF:SB:SC:PF	0	0	0	0	0	0.0051	0	0	0.99	1	0	0	0	0	0	0	0	0	0	0
NC_000913.3	3574841	asd	NP_417891.1	A	T	56.91	PASS	SN=0;STA=3574840;STO=3574841;TYP=SUB;R1P=103;R1M=120;R2P=94;R2M=95;AD=412;DP=9496;MCOV=-41;PPC=409;AF=0.0434;RAF=0.0000;LS=44734;MQS=24720;MQM=60;BQS=14916;BQM=39;EDS=13395;EDM=75;IDS=403323;IDM=989;CED=601;HMP=0;SB=0.9998;EFF=NON_SYNONYMOUS_CODING(MODERATE|MISSENSE|gTc/gAc|V13D|367|asd|protein_coding|CODING|NP_417891.1|1|1)	GT:DP:AD:AF:RAF:SB:SC:PF	0	0	0.0075	0.0041	0	0	0.0045	0	1	1	0	0.0041	0	0	0	0	0.0043	0	0	0
NC_000913.3	3606268	yhhN	NP_417925.1	T	A	57.76	PASS	SN=0;STA=3606267;STO=3606268;TYP=SUB;R1P=82;R1M=84;R2P=72;R2M=74;AD=312;DP=7448;MCOV=-41;PPC=308;AF=0.0419;RAF=0.0000;LS=36267;MQS=18720;MQM=60;BQS=11580;BQM=39;EDS=10007;EDM=73;IDS=308665;IDM=992;CED=601;HMP=0;SB=0.9999;EFF=NON_SYNONYMOUS_CODING(MODERATE|MISSENSE|tTt/tAt|F173Y|208|yhhN|protein_coding|CODING|NP_417925.1|1|1)	GT:DP:AD:AF:RAF:SB:SC:PF	0	0	0	0	0	0	0	0	1	1	0	0	0	0	0.0068	0	0	0	0	0
NC_000913.3	3640144	uspA	NP_417952.1	C	T	56.81	PASS	SN=0;STA=3640143;STO=3640144;TYP=SUB;R1P=36;R1M=41;R2P=29;R2M=36;AD=142;DP=9533;MCOV=-41;PPC=142;AF=0.0149;RAF=0.0000;LS=19972;MQS=8520;MQM=60;BQS=5308;BQM=39;EDS=4767;EDM=74;IDS=140041;IDM=992;CED=601;HMP=1;SB=0.9997;EFF=NON_SYNONYMOUS_CODING(MODERATE|MISSENSE|Ctc/Ttc|L12F|144|uspA|protein_coding|CODING|NP_417952.1|1|1)	GT:DP:AD:AF:RAF:SB:SC:PF	0	0	0	0	0	0	0	0	0	1	0	0	0	0	0	0	0	0	0	0
NC_000913.3	3648628	arsR	NP_417958.1	G	A	57.97	PASS	SN=0;STA=3648627;STO=3648628;TYP=SUB;R1P=84;R1M=93;R2P=95;R2M=131;AD=403;DP=8817;MCOV=-41;PPC=400;AF=0.0457;RAF=0.0000;LS=44310;MQS=24180;MQM=60;BQS=14953;BQM=39;EDS=13189;EDM=74;IDS=398454;IDM=992;CED=601;HMP=0;SB=0.9996;EFF=NON_SYNONYMOUS_CODING(MODERATE|MISSENSE|tGc/tAc|C34Y|117|arsR|protein_coding|CODING|NP_417958.1|1|1)	GT:DP:AD:AF:RAF:SB:SC:PF	0	0	0.0043	0.009	0.004	0	0	0	1	1	0	0	0	0	0	0	0.0042	0	0	0
NC_000913.3	3694795	bcsA	NP_417990.4	GC	G	57.51	PASS	SN=0;STA=3694795;STO=3694796;TYP=DEL;R1P=39;R1M=31;R2P=39;R2M=39;AD=148;DP=8326;MCOV=-41;PPC=147;AF=0.0178;RAF=0.0000;LS=20759;MQS=8880;MQM=60;BQS=5449;BQM=38;EDS=6193;EDM=75;IDS=146312;IDM=992;CED=601;HMP=1;SB=0.9998;EFF=FRAME_SHIFT(HIGH||gcg/|A147|872|bcsA|protein_coding|CODING|NP_417990.4|1|1);LOF=(bcsA|b3533|1|1.00)	GT:DP:AD:AF:RAF:SB:SC:PF	0	0	0	0	0	0	0	0	0	1	0	0	0	0	0	0	0	0	0	0
NC_000913.3	3761726	yibF	NP_418049.1	G	T	57.28	PASS	SN=0;STA=3761725;STO=3761726;TYP=SUB;R1P=27;R1M=36;R2P=43;R2M=50;AD=156;DP=8100;MCOV=-41;PPC=156;AF=0.0193;RAF=0.0000;LS=21424;MQS=9360;MQM=60;BQS=5631;BQM=38;EDS=5949;EDM=74;IDS=154394;IDM=992;CED=601;HMP=0;SB=0.9996;EFF=NON_SYNONYMOUS_CODING(MODERATE|MISSENSE|cCg/cAg|P77Q|202|yibF|protein_coding|CODING|NP_418049.1|1|1)	GT:DP:AD:AF:RAF:SB:SC:PF	0	0.0093	0	0	0	0.0045	0.0048	0	0	1	0.005	0	0.0045	0	0	0	0.0043	0.0045	0	0
NC_000913.3	3806932	waaG	NP_418088.1	G	T	57.52	PASS	SN=0;STA=3806931;STO=3806932;TYP=SUB;R1P=34;R1M=31;R2P=39;R2M=37;AD=141;DP=9984;MCOV=-41;PPC=141;AF=0.0141;RAF=0.0000;LS=19281;MQS=8460;MQM=60;BQS=5304;BQM=39;EDS=5311;EDM=74;IDS=139785;IDM=992;CED=601;HMP=0;SB=0.9999;EFF=NON_SYNONYMOUS_CODING(MODERATE|MISSENSE|Ccg/Acg|P46T|374|waaG|protein_coding|CODING|NP_418088.1|1|1)	GT:DP:AD:AF:RAF:SB:SC:PF	0	0.0033	0.0033	0	0.0037	0.0035	0.0036	0	0	1	0.0036	0.0079	0	0.0075	0	0	0	0	0	0.0038
NC_000913.3	3829407	xanP	NP_418111.1	C	T	57.63	PASS	SN=0;STA=3829406;STO=3829407;TYP=SUB;R1P=82;R1M=84;R2P=85;R2M=87;AD=338;DP=7123;MCOV=-41;PPC=331;AF=0.0475;RAF=0.0000;LS=37796;MQS=20270;MQM=60;BQS=12503;BQM=39;EDS=10675;EDM=75;IDS=334031;IDM=992;CED=601;HMP=0;SB=1.0000;EFF=NON_SYNONYMOUS_CODING(MODERATE|MISSENSE|Cgc/Tgc|R155C|463|xanP|protein_coding|CODING|NP_418111.1|1|1)	GT:DP:AD:AF:RAF:SB:SC:PF	0	0	0	0	0	0	0	0	1	1	0.0066	0	0	0	0	0	0	0	0.0119	0
NC_000913.3	3839974	nlpA	NP_418117.1	T	C	58.23	PASS	SN=0;STA=3839973;STO=3839974;TYP=SUB;R1P=149;R1M=134;R2P=114;R2M=108;AD=505;DP=11494;MCOV=-41;PPC=499;AF=0.0439;RAF=0.0000;LS=54588;MQS=30300;MQM=60;BQS=18632;BQM=39;EDS=16032;EDM=74;IDS=499145;IDM=992;CED=601;HMP=0;SB=0.9998;EFF=NON_SYNONYMOUS_CODING(MODERATE|MISSENSE|cAt/cGt|H7R|272|nlpA|protein_coding|CODING|NP_418117.1|1|1)	GT:DP:AD:AF:RAF:SB:SC:PF	0	0.0028	0.0026	0	0	0	0	0	1	1	0	0	0	0	0	0	0	0	0	0
NC_000913.3	3865790	yidE	NP_418140.4	T	A	57.56	PASS	SN=0;STA=3865789;STO=3865790;TYP=SUB;R1P=39;R1M=43;R2P=33;R2M=37;AD=152;DP=8574;MCOV=-41;PPC=152;AF=0.0177;RAF=0.0000;LS=21182;MQS=9120;MQM=60;BQS=5508;BQM=38;EDS=6028;EDM=74;IDS=150605;IDM=992;CED=601;HMP=1;SB=0.9998;EFF=NON_SYNONYMOUS_CODING(MODERATE|MISSENSE|Atg/Ttg|M162L|553|yidE|protein_coding|CODING|NP_418140.4|1|1)	GT:DP:AD:AF:RAF:SB:SC:PF	0	0	0	0	0	0	0	0	0	1	0	0.0052	0.0052	0	0	0	0	0	0.0044	0
NC_000913.3	3883881	0	0	C	T	57.67	PASS	SN=0;STA=3883880;STO=3883881;TYP=SUB;R1P=107;R1M=98;R2P=126;R2M=91;AD=422;DP=9533;MCOV=-41;PPC=420;AF=0.0443;RAF=0.0000;LS=45907;MQS=25320;MQM=60;BQS=15469;BQM=39;EDS=12823;EDM=75;IDS=417170;IDM=992;CED=601;HMP=0;SB=0.9996;EFF=INTERGENIC(MODIFIER||||||||||1)	GT:DP:AD:AF:RAF:SB:SC:PF	0	0.0039	0.0041	0	0	0	0	0	1	1	0.004	0	0	0	0	0	0.004	0	0	0
NC_000913.3	3900176	yieL	NP_418175.3	A	T	48.39	PASS	SN=0;STA=3900175;STO=3900176;TYP=SUB;R1P=102;R1M=94;R2P=97;R2M=96;AD=389;DP=9069;MCOV=-41;PPC=383;AF=0.0429;RAF=0.0000;LS=43048;MQS=23340;MQM=60;BQS=14414;BQM=39;EDS=12259;EDM=75;IDS=384502;IDM=992;CED=601;HMP=3;SB=0.9999;EFF=NON_SYNONYMOUS_CODING(MODERATE|MISSENSE|gaT/gaA|D134E|389|yieL|protein_coding|CODING|NP_418175.3|1|1)	GT:DP:AD:AF:RAF:SB:SC:PF	0	0	0	0	0	0	0	0	0.9958	1	0	0	0	0	0	0	0	0	0	0
NC_000913.3	3921622	atpB	NP_418194.1	A	G	57.3	PASS	SN=0;STA=3921621;STO=3921622;TYP=SUB;R1P=40;R1M=91;R2P=88;R2M=108;AD=327;DP=7553;MCOV=-41;PPC=320;AF=0.0433;RAF=0.0000;LS=37289;MQS=19620;MQM=60;BQS=11840;BQM=38;EDS=11168;EDM=75;IDS=323486;IDM=992;CED=601;HMP=1;SB=0.9993;EFF=NON_SYNONYMOUS_CODING(MODERATE|MISSENSE|Tct/Cct|S144P|271|atpB|protein_coding|CODING|NP_418194.1|1|1)	GT:DP:AD:AF:RAF:SB:SC:PF	0	0	0	0	0	0	0	0	1	1	0	0	0	0	0	0	0	0	0	0
NC_000913.3	3940414	hsrA	NP_418210.1	C	T	58.74	PASS	SN=0;STA=3940413;STO=3940414;TYP=SUB;R1P=50;R1M=51;R2P=41;R2M=45;AD=187;DP=8298;MCOV=-41;PPC=187;AF=0.0225;RAF=0.0000;LS=26167;MQS=11220;MQM=60;BQS=7079;BQM=39;EDS=7854;EDM=75;IDS=185219;IDM=992;CED=601;HMP=0;SB=0.9999;EFF=NON_SYNONYMOUS_CODING(MODERATE|MISSENSE|Gga/Aga|G67R|475|hsrA|protein_coding|CODING|NP_418210.1|1|1)	GT:DP:AD:AF:RAF:SB:SC:PF	0.0046	0	0	0	0	0	0	0	0	1	0	0	0	0	0	0	0	0	0	0
NC_000913.3	3947511	hdfR	YP_026246.1	T	C	58.43	PASS	SN=0;STA=3947510;STO=3947511;TYP=SUB;R1P=111;R1M=102;R2P=120;R2M=105;AD=438;DP=10005;MCOV=-41;PPC=437;AF=0.0438;RAF=0.0000;LS=48740;MQS=26274;MQM=60;BQS=16392;BQM=39;EDS=13948;EDM=75;IDS=433184;IDM=992;CED=601;HMP=0;SB=0.9998;EFF=NON_SYNONYMOUS_CODING(MODERATE|MISSENSE|Atg/Gtg|M153V|279|hdfR|protein_coding|CODING|YP_026246.1|1|1|WARNING_TRANSCRIPT_NO_START_CODON)	GT:DP:AD:AF:RAF:SB:SC:PF	0	0	0	0	0.0038	0.0042	0	0	0.9923	1	0	0	0	0	0	0	0	0	0	0
NC_000913.3	3973521	rffG	YP_026255.1	A	G	58.2	PASS	SN=0;STA=3973520;STO=3973521;TYP=SUB;R1P=97;R1M=107;R2P=101;R2M=40;AD=345;DP=6984;MCOV=-41;PPC=345;AF=0.0494;RAF=0.0000;LS=39349;MQS=20700;MQM=60;BQS=12820;BQM=39;EDS=11481;EDM=74;IDS=341287;IDM=992;CED=601;HMP=0;SB=0.9995;EFF=NON_SYNONYMOUS_CODING(MODERATE|MISSENSE|Aat/Gat|N334D|355|rffG|protein_coding|CODING|YP_026255.1|1|1)	GT:DP:AD:AF:RAF:SB:SC:PF	0	0	0	0	0.0118	0	0	0	0.989	1	0	0	0	0	0	0	0	0	0	0.0063
NC_000913.3	4010209	yigL	YP_026267.1	G	A	57.76	PASS	SN=0;STA=4010208;STO=4010209;TYP=SUB;R1P=111;R1M=68;R2P=130;R2M=81;AD=390;DP=8429;MCOV=-41;PPC=388;AF=0.0463;RAF=0.0000;LS=43457;MQS=23400;MQM=60;BQS=14260;BQM=39;EDS=12484;EDM=74;IDS=385529;IDM=992;CED=601;HMP=0;SB=0.9992;EFF=NON_SYNONYMOUS_CODING(MODERATE|MISSENSE|Gtt/Att|V4I|266|yigL|protein_coding|CODING|YP_026267.1|1|1)	GT:DP:AD:AF:RAF:SB:SC:PF	0.0051	0	0	0	0.0046	0	0.0042	0	1	1	0	0	0	0	0	0	0	0	0	0
NC_000913.3	4020516	ubiB	NP_418279.1	T	C	57.88	PASS	SN=0;STA=4020515;STO=4020516;TYP=SUB;R1P=101;R1M=91;R2P=89;R2M=70;AD=351;DP=8383;MCOV=-41;PPC=349;AF=0.0419;RAF=0.0000;LS=39350;MQS=21060;MQM=60;BQS=12979;BQM=39;EDS=12122;EDM=75;IDS=346992;IDM=992;CED=601;HMP=0;SB=0.9997;EFF=SYNONYMOUS_CODING(LOW|SILENT|gtT/gtC|V97|546|ubiB|protein_coding|CODING|NP_418279.1|1|1)	GT:DP:AD:AF:RAF:SB:SC:PF	0	0	0	0	0	0	0	0	1	1	0	0	0	0	0	0	0	0	0	0
NC_000913.3	4042060	0	0	A	G	46.49	PASS	SN=0;STA=4042059;STO=4042060;TYP=SUB;R1P=120;R1M=121;R2P=109;R2M=95;AD=445;DP=10687;MCOV=-41;PPC=440;AF=0.0416;RAF=0.0000;LS=48188;MQS=26700;MQM=60;BQS=16076;BQM=40;EDS=14492;EDM=75;IDS=439834;IDM=992;CED=601;HMP=4;SB=0.9999;EFF=INTERGENIC(MODIFIER||||||||||1)	GT:DP:AD:AF:RAF:SB:SC:PF	0	0	0.0033	0.0035	0	0.003	0	0	0.9965	1	0	0	0	0	0	0	0	0.0038	0	0.0043
NC_000913.3	4102509	kdgT	NP_418345.2	G	A	57.3	PASS	SN=0;STA=4102508;STO=4102509;TYP=SUB;R1P=110;R1M=80;R2P=100;R2M=93;AD=383;DP=7870;MCOV=-41;PPC=380;AF=0.0487;RAF=0.0000;LS=42862;MQS=22980;MQM=60;BQS=14047;BQM=39;EDS=11947;EDM=74;IDS=378575;IDM=992;CED=601;HMP=0;SB=0.9996;EFF=NON_SYNONYMOUS_CODING(MODERATE|MISSENSE|Gca/Aca|A274T|327|kdgT|protein_coding|CODING|NP_418345.2|1|1)	GT:DP:AD:AF:RAF:SB:SC:PF	0	0	0	0	0	0	0	0	0.991	1	0	0	0	0	0	0	0	0	0	0
NC_000913.3	4134194	katG	NP_418377.1	G	A	58.16	PASS	SN=0;STA=4134193;STO=4134194;TYP=SUB;R1P=42;R1M=44;R2P=45;R2M=41;AD=172;DP=7619;MCOV=-41;PPC=171;AF=0.0226;RAF=0.0000;LS=24032;MQS=10320;MQM=60;BQS=6288;BQM=38;EDS=7456;EDM=75;IDS=170453;IDM=992;CED=601;HMP=0;SB=1.0000;EFF=SYNONYMOUS_CODING(LOW|SILENT|gcG/gcA|A120|726|katG|protein_coding|CODING|NP_418377.1|1|1)	GT:DP:AD:AF:RAF:SB:SC:PF	0	0.0052	0	0	0	0	0	0	0	1	0	0	0	0	0	0	0	0	0	0
NC_000913.3	4184842	rpoB	NP_418414.1	A	G	57.64	PASS	SN=0;STA=4184841;STO=4184842;TYP=SUB;R1P=87;R1M=71;R2P=84;R2M=88;AD=330;DP=8622;MCOV=-41;PPC=324;AF=0.0383;RAF=0.0000;LS=37746;MQS=19800;MQM=60;BQS=12001;BQM=39;EDS=10960;EDM=75;IDS=326426;IDM=992;CED=601;HMP=1;SB=0.9999;EFF=NON_SYNONYMOUS_CODING(MODERATE|MISSENSE|Aaa/Gaa|K1200E|1342|rpoB|protein_coding|CODING|NP_418414.1|1|1)	GT:DP:AD:AF:RAF:SB:SC:PF	0	0	0	0	0	0	0	0	1	1	0	0	0	0	0	0	0	0	0	0
NC_000913.3	4191794	thiH	NP_418417.1	A	T	57.75	PASS	SN=0;STA=4191793;STO=4191794;TYP=SUB;R1P=69;R1M=93;R2P=76;R2M=101;AD=339;DP=7009;MCOV=-41;PPC=338;AF=0.0484;RAF=0.0000;LS=38704;MQS=20340;MQM=60;BQS=12433;BQM=39;EDS=11119;EDM=75;IDS=335125;IDM=992;CED=601;HMP=0;SB=0.9995;EFF=SYNONYMOUS_CODING(LOW|SILENT|gcT/gcA|A25|377|thiH|protein_coding|CODING|NP_418417.1|1|1)	GT:DP:AD:AF:RAF:SB:SC:PF	0	0	0	0	0	0	0	0	0.9944	1	0.0065	0	0	0	0	0	0	0	0	0
NC_000913.3	4214903	metA	NP_418437.1	G	T	58.6	PASS	SN=0;STA=4214902;STO=4214903;TYP=SUB;R1P=86;R1M=119;R2P=128;R2M=115;AD=448;DP=10640;MCOV=-41;PPC=446;AF=0.0421;RAF=0.0000;LS=49607;MQS=26880;MQM=60;BQS=16645;BQM=40;EDS=14239;EDM=75;IDS=442641;IDM=992;CED=601;HMP=1;SB=0.9998;EFF=SYNONYMOUS_CODING(LOW|SILENT|ctG/ctT|L208|309|metA|protein_coding|CODING|NP_418437.1|1|1)	GT:DP:AD:AF:RAF:SB:SC:PF	0	0	0.0086	0	0	0.0037	0	0	1	1	0	0.0039	0.004	0	0.0076	0	0.0036	0	0.0038	0
NC_000913.3	4220630	arpA	NP_418441.1	A	C	58.49	PASS	SN=0;STA=4220629;STO=4220630;TYP=SUB;R1P=150;R1M=140;R2P=144;R2M=133;AD=567;DP=13406;MCOV=-41;PPC=564;AF=0.0423;RAF=0.0000;LS=59986;MQS=34020;MQM=60;BQS=21046;BQM=39;EDS=17857;EDM=74;IDS=560580;IDM=992;CED=601;HMP=0;SB=0.9999;EFF=NON_SYNONYMOUS_CODING(MODERATE|MISSENSE|Tct/Gct|S620A|728|arpA|protein_coding|CODING|NP_418441.1|1|1)	GT:DP:AD:AF:RAF:SB:SC:PF	0	0	0	0	0	0	0	0	1	1	0	0	0	0	0	0	0	0.0028	0	0
NC_000913.3	4263715	qorA	NP_418475.1	C	T	58.2	PASS	SN=0;STA=4263714;STO=4263715;TYP=SUB;R1P=105;R1M=107;R2P=98;R2M=114;AD=424;DP=8898;MCOV=-41;PPC=420;AF=0.0477;RAF=0.0000;LS=47670;MQS=25440;MQM=60;BQS=15550;BQM=39;EDS=14130;EDM=75;IDS=419187;IDM=992;CED=601;HMP=1;SB=0.9998;EFF=NON_SYNONYMOUS_CODING(MODERATE|MISSENSE|Gga/Aga|G173R|327|qorA|protein_coding|CODING|NP_418475.1|1|1)	GT:DP:AD:AF:RAF:SB:SC:PF	0.0047	0	0	0	0	0	0	0	0.9958	1	0	0	0	0	0	0	0	0	0	0
NC_000913.3	4265373	dnaB	NP_418476.1	T	A	57.44	PASS	SN=0;STA=4265372;STO=4265373;TYP=SUB;R1P=52;R1M=43;R2P=32;R2M=43;AD=170;DP=7773;MCOV=-41;PPC=169;AF=0.0219;RAF=0.0000;LS=23920;MQS=10200;MQM=60;BQS=6292;BQM=38;EDS=5903;EDM=74;IDS=168584;IDM=992;CED=601;HMP=0;SB=1.0000;EFF=NON_SYNONYMOUS_CODING(MODERATE|MISSENSE|Tcc/Acc|S354T|471|dnaB|protein_coding|CODING|NP_418476.1|1|1)	GT:DP:AD:AF:RAF:SB:SC:PF	0	0	0	0	0	0	0	0	0	1	0	0	0	0	0	0	0	0	0	0
NC_000913.3	4282928	yjcF	NP_418490.1	G	A	58.42	PASS	SN=0;STA=4282927;STO=4282928;TYP=SUB;R1P=109;R1M=194;R2P=134;R2M=190;AD=627;DP=14892;MCOV=-41;PPC=625;AF=0.0421;RAF=0.0000;LS=66906;MQS=37620;MQM=60;BQS=23397;BQM=39;EDS=19951;EDM=74;IDS=619979;IDM=992;CED=601;HMP=1;SB=0.9993;EFF=NON_SYNONYMOUS_CODING(MODERATE|MISSENSE|Ctc/Ttc|L50F|430|yjcF|protein_coding|CODING|NP_418490.1|1|1)	GT:DP:AD:AF:RAF:SB:SC:PF	0	0.002	0	0	0	0	0	0	1	1	0	0	0	0	0	0	0	0	0	0.0024
NC_000913.3	4311638	alsB	NP_418512.1	G	A	58.09	PASS	SN=0;STA=4311637;STO=4311638;TYP=SUB;R1P=118;R1M=85;R2P=143;R2M=85;AD=431;DP=9916;MCOV=-41;PPC=427;AF=0.0435;RAF=0.0000;LS=46883;MQS=25860;MQM=60;BQS=16070;BQM=39;EDS=13924;EDM=74;IDS=425927;IDM=992;CED=601;HMP=0;SB=0.9993;EFF=SYNONYMOUS_CODING(LOW|SILENT|acC/acT|T135|311|alsB|protein_coding|CODING|NP_418512.1|1|1)	GT:DP:AD:AF:RAF:SB:SC:PF	0	0	0.0038	0	0	0	0	0	0.9927	1	0.0037	0	0	0	0	0	0	0	0	0
NC_000913.3	4319598	phnJ	NP_418522.1	A	G	58.02	PASS	SN=0;STA=4319597;STO=4319598;TYP=SUB;R1P=37;R1M=31;R2P=41;R2M=36;AD=145;DP=6983;MCOV=-41;PPC=145;AF=0.0208;RAF=0.0000;LS=20445;MQS=8700;MQM=60;BQS=5507;BQM=39;EDS=5844;EDM=75;IDS=143784;IDM=992;CED=601;HMP=1;SB=0.9997;EFF=SYNONYMOUS_CODING(LOW|SILENT|aaT/aaC|N3|281|phnJ|protein_coding|CODING|NP_418522.1|1|1)	GT:DP:AD:AF:RAF:SB:SC:PF	0	0	0	0	0	0	0	0	0	1	0	0	0	0	0	0	0	0	0	0
NC_000913.3	4343657	melB	NP_418544.2	GC	G	58.35	PASS	SN=0;STA=4343657;STO=4343658;TYP=DEL;R1P=35;R1M=41;R2P=49;R2M=37;AD=162;DP=11037;MCOV=-41;PPC=162;AF=0.0147;RAF=0.0000;LS=22842;MQS=9720;MQM=60;BQS=6085;BQM=39;EDS=6795;EDM=75;IDS=160599;IDM=992;CED=601;HMP=1;SB=0.9999;EFF=FRAME_SHIFT(HIGH||gcg/|A97|473|melB|protein_coding|CODING|NP_418544.2|1|1);LOF=(melB|b4120|1|1.00)	GT:DP:AD:AF:RAF:SB:SC:PF	0	0	0	0	0	0	0	0	0	1	0	0	0	0	0	0	0	0	0	0
NC_000913.3	4389057	mscM	NP_418583.1	G	C	48.08	PASS	SN=0;STA=4389056;STO=4389057;TYP=SUB;R1P=79;R1M=93;R2P=93;R2M=99;AD=364;DP=7848;MCOV=-41;PPC=361;AF=0.0464;RAF=0.0000;LS=41409;MQS=21840;MQM=60;BQS=13052;BQM=39;EDS=12331;EDM=75;IDS=359931;IDM=992;CED=601;HMP=3;SB=0.9998;EFF=NON_SYNONYMOUS_CODING(MODERATE|MISSENSE|gCg/gGg|A105G|1107|mscM|protein_coding|CODING|NP_418583.1|1|1|WARNING_TRANSCRIPT_NO_START_CODON)	GT:DP:AD:AF:RAF:SB:SC:PF	0	0	0	0	0	0	0	0	0.9949	1	0	0	0	0	0.0051	0	0	0	0	0
NC_000913.3	4401793	hflX	NP_418594.1	G	A	58.28	PASS	SN=0;STA=4401792;STO=4401793;TYP=SUB;R1P=81;R1M=114;R2P=70;R2M=83;AD=348;DP=7712;MCOV=-41;PPC=343;AF=0.0451;RAF=0.0000;LS=39536;MQS=20880;MQM=60;BQS=12989;BQM=39;EDS=11211;EDM=75;IDS=344226;IDM=992;CED=601;HMP=0;SB=0.9995;EFF=SYNONYMOUS_CODING(LOW|SILENT|ccG/ccA|P374|426|hflX|protein_coding|CODING|NP_418594.1|1|1)	GT:DP:AD:AF:RAF:SB:SC:PF	0	0.0111	0	0	0	0.0061	0	0	0.9946	1	0	0.0059	0	0	0	0	0	0	0	0
NC_000913.3	4412528	yjfM	NP_418606.1	G	T	57.86	PASS	SN=0;STA=4412527;STO=4412528;TYP=SUB;R1P=42;R1M=43;R2P=41;R2M=53;AD=179;DP=10347;MCOV=-41;PPC=179;AF=0.0173;RAF=0.0000;LS=25023;MQS=10740;MQM=60;BQS=6531;BQM=38;EDS=6840;EDM=74;IDS=177404;IDM=992;CED=601;HMP=1;SB=0.9997;EFF=NON_SYNONYMOUS_CODING(MODERATE|MISSENSE|Gcc/Tcc|A48S|212|yjfM|protein_coding|CODING|NP_418606.1|1|1)	GT:DP:AD:AF:RAF:SB:SC:PF	0	0	0	0	0	0.0035	0	0	0	1	0	0	0	0	0	0	0.0034	0	0.0038	0
NC_000913.3	4459779	cybC	b4236	G	C	58.32	PASS	SN=0;STA=4459778;STO=4459779;TYP=SUB;R1P=106;R1M=118;R2P=89;R2M=107;AD=420;DP=9777;MCOV=-41;PPC=413;AF=0.0430;RAF=0.0000;LS=46985;MQS=25200;MQM=60;BQS=15609;BQM=39;EDS=13360;EDM=75;IDS=415372;IDM=992;CED=601;HMP=0;SB=0.9997;EFF=NON_SYNONYMOUS_CODING(MODERATE|MISSENSE|gGt/gCt|G97A|121|cybC|protein_coding|CODING|b4236|1|1|WARNING_TRANSCRIPT_NO_START_CODON)	GT:DP:AD:AF:RAF:SB:SC:PF	0	0	0	0	0	0	0	0	0.9959	1	0	0	0	0	0	0	0	0	0	0
NC_000913.3	4473883	bdcA	NP_418670.1	G	A	50.95	PASS	SN=0;STA=4473882;STO=4473883;TYP=SUB;R1P=45;R1M=39;R2P=38;R2M=35;AD=157;DP=8063;MCOV=-41;PPC=155;AF=0.0195;RAF=0.0000;LS=21884;MQS=9395;MQM=60;BQS=5973;BQM=39;EDS=6122;EDM=75;IDS=155397;IDM=992;CED=601;HMP=2;SB=0.9998;EFF=SYNONYMOUS_CODING(LOW|SILENT|ttC/ttT|F57|237|bdcA|protein_coding|CODING|NP_418670.1|1|1)	GT:DP:AD:AF:RAF:SB:SC:PF	0.0055	0	0	0	0	0	0	0	0	1	0	0	0	0	0	0	0.0053	0	0	0
NC_000913.3	4481823	valS	NP_418679.1	A	T	57.09	PASS	SN=0;STA=4481822;STO=4481823;TYP=SUB;R1P=75;R1M=69;R2P=44;R2M=77;AD=265;DP=6214;MCOV=-41;PPC=264;AF=0.0426;RAF=0.0000;LS=31315;MQS=15900;MQM=60;BQS=9625;BQM=38;EDS=9234;EDM=75;IDS=262191;IDM=992;CED=601;HMP=0;SB=0.9996;EFF=NON_SYNONYMOUS_CODING(MODERATE|MISSENSE|cTg/cAg|L672Q|951|valS|protein_coding|CODING|NP_418679.1|1|1)	GT:DP:AD:AF:RAF:SB:SC:PF	0	0	0	0	0	0	0	0	1	1	0	0	0	0	0	0	0	0	0	0
NC_000913.3	4503634	0	0	G	C	57.98	PASS	SN=0;STA=4503633;STO=4503634;TYP=SUB;R1P=190;R1M=133;R2P=173;R2M=110;AD=606;DP=14593;MCOV=-41;PPC=604;AF=0.0415;RAF=0.0000;LS=64365;MQS=36360;MQM=60;BQS=22308;BQM=39;EDS=18199;EDM=75;IDS=599157;IDM=992;CED=601;HMP=0;SB=0.9993;EFF=INTERGENIC(MODIFIER||||||||||1)	GT:DP:AD:AF:RAF:SB:SC:PF	0	0	0.0045	0	0	0	0	0	0.9976	1	0	0	0	0	0	0	0	0	0	0
NC_000913.3	4537261	nanS	NP_418729.1	C	A	57.79	PASS	SN=0;STA=4537260;STO=4537261;TYP=SUB;R1P=106;R1M=126;R2P=101;R2M=109;AD=442;DP=9807;MCOV=-41;PPC=439;AF=0.0451;RAF=0.0000;LS=47186;MQS=26520;MQM=60;BQS=16456;BQM=40;EDS=13465;EDM=75;IDS=436692;IDM=992;CED=601;HMP=0;SB=0.9998;EFF=NON_SYNONYMOUS_CODING(MODERATE|MISSENSE|Ggg/Tgg|G112W|326|nanS|protein_coding|CODING|NP_418729.1|1|1)	GT:DP:AD:AF:RAF:SB:SC:PF	0	0.0041	0.0075	0	0.0033	0	0.0073	0	0.9964	1	0.0077	0	0.008	0	0.008	0	0.004	0.0092	0.0079	0
NC_000913.3	4539135	nanC	NP_418731.2	G	A	46.67	PASS	SN=0;STA=4539134;STO=4539135;TYP=SUB;R1P=38;R1M=46;R2P=49;R2M=49;AD=182;DP=11563;MCOV=-41;PPC=182;AF=0.0157;RAF=0.0000;LS=25662;MQS=10920;MQM=60;BQS=6973;BQM=39;EDS=6946;EDM=75;IDS=180366;IDM=992;CED=601;HMP=4;SB=0.9998;EFF=NON_SYNONYMOUS_CODING(MODERATE|MISSENSE|Ctt/Ttt|L123F|238|nanC|protein_coding|CODING|NP_418731.2|1|1)	GT:DP:AD:AF:RAF:SB:SC:PF	0	0	0	0	0	0	0	0	0	1	0	0	0	0	0	0	0	0	0	0
NC_000913.3	4543544	fimA	NP_418734.1	G	A	44.86	PASS	SN=0;STA=4543543;STO=4543544;TYP=SUB;R1P=84;R1M=106;R2P=75;R2M=116;AD=381;DP=8337;MCOV=-41;PPC=365;AF=0.0457;RAF=0.0000;LS=42847;MQS=22860;MQM=60;BQS=14161;BQM=39;EDS=12073;EDM=75;IDS=376822;IDM=992;CED=601;HMP=5;SB=0.9994;EFF=NON_SYNONYMOUS_CODING(MODERATE|MISSENSE|Gaa/Aaa|E144K|182|fimA|protein_coding|CODING|NP_418734.1|1|1)	GT:DP:AD:AF:RAF:SB:SC:PF	0	0	0	0	0	0	0	0	1	1	0.0047	0	0	0	0	0	0	0	0	0
NC_000913.3	4568115	mdtM	NP_418757.1	C	T	58.45	PASS	SN=0;STA=4568114;STO=4568115;TYP=SUB;R1P=96;R1M=104;R2P=92;R2M=90;AD=382;DP=8107;MCOV=-41;PPC=377;AF=0.0471;RAF=0.0000;LS=43437;MQS=22920;MQM=60;BQS=14194;BQM=39;EDS=12309;EDM=75;IDS=377873;IDM=992;CED=601;HMP=1;SB=0.9999;EFF=SYNONYMOUS_CODING(LOW|SILENT|ggG/ggA|G135|410|mdtM|protein_coding|CODING|NP_418757.1|1|1)	GT:DP:AD:AF:RAF:SB:SC:PF	0	0	0	0	0	0	0	0	0.9952	1	0	0	0	0	0	0	0	0	0	0
NC_000913.3	1593438	yneO	b4696	A	G	58.7	PASS	SN=0;STA=1593437;STO=1593438;TYP=SUB;R1P=101;R1M=93;R2P=86;R2M=96;AD=376;DP=9560;MCOV=-41;PPC=372;AF=0.0393;RAF=0.0000;LS=44545;MQS=22560;MQM=60;BQS=14003;BQM=39;EDS=12877;EDM=75;IDS=371659;IDM=992;CED=601;HMP=1;SB=1.0000;EFF=NON_SYNONYMOUS_CODING(MODERATE|MISSENSE|Tat/Cat|Y1517H|1773|yneO|protein_coding|CODING|b4696|2|1)	GT:DP:AD:AF:RAF:SB:SC:PF	0	0	0	0	0	0	0	0	0.994	0.9953	0	0	0	0.0052	0	0	0	0	0	0
NC_000913.3	1580774	ydeM	NP_416014.4	T	A	58.63	PASS	SN=0;STA=1580773;STO=1580774;TYP=SUB;R1P=137;R1M=127;R2P=162;R2M=135;AD=561;DP=9915;MCOV=-41;PPC=554;AF=0.0566;RAF=0.0000;LS=60649;MQS=33660;MQM=60;BQS=20735;BQM=39;EDS=18088;EDM=75;IDS=554573;IDM=992;CED=601;HMP=0;SB=0.9998;EFF=NON_SYNONYMOUS_CODING(MODERATE|MISSENSE|aAg/aTg|K6M|385|ydeM|protein_coding|CODING|NP_416014.4|1|1)	GT:DP:AD:AF:RAF:SB:SC:PF	0	0	0	0	0	0	0	0	1	0.9949	0	0	0	0	0	0	0	0	0	0
NC_000913.3	3587029	yhhA	NP_417905.1	G	A	58.68	PASS	SN=0;STA=3587028;STO=3587029;TYP=SUB;R1P=463;R1M=519;R2P=480;R2M=476;AD=1938;DP=8226;MCOV=-41;PPC=1922;AF=0.2356;RAF=0.0000;LS=192516;MQS=116280;MQM=60;BQS=71620;BQM=39;EDS=57471;EDM=75;IDS=1915229;IDM=992;CED=601;HMP=0;SB=0.9999;EFF=SYNONYMOUS_CODING(LOW|SILENT|ccG/ccA|P29|146|yhhA|protein_coding|CODING|NP_417905.1|1|1)	GT:DP:AD:AF:RAF:SB:SC:PF	0	0	0	0	0	0.9949	0.9892	1	1	0.9947	0	0	0	0	0	0.0066	0	0	0	0
NC_000913.3	2507778	fryC	NP_416887.1	C	T	58.65	PASS	SN=0;STA=2507777;STO=2507778;TYP=SUB;R1P=551;R1M=449;R2P=537;R2M=421;AD=1958;DP=7990;MCOV=-41;PPC=1947;AF=0.2451;RAF=0.0000;LS=196062;MQS=117469;MQM=60;BQS=72002;BQM=39;EDS=57657;EDM=75;IDS=1935295;IDM=992;CED=601;HMP=1;SB=0.9996;EFF=SYNONYMOUS_CODING(LOW|SILENT|gtG/gtA|V39|415|fryC|protein_coding|CODING|NP_416887.1|1|1)	GT:DP:AD:AF:RAF:SB:SC:PF	0	0	0	0	0	0.9947	0.99	0.989	0.9946	0.9947	0	0	0	0	0	0	0	0.0047	0	0
NC_000913.3	2074833	yeeR	NP_416505.2	C	A	58.49	PASS	SN=0;STA=2074832;STO=2074833;TYP=SUB;R1P=638;R1M=476;R2P=597;R2M=533;AD=2244;DP=9102;MCOV=-41;PPC=2238;AF=0.2465;RAF=0.0000;LS=222177;MQS=134640;MQM=60;BQS=83178;BQM=39;EDS=64698;EDM=75;IDS=2217904;IDM=992;CED=601;HMP=0;SB=0.9996;EFF=NON_SYNONYMOUS_CODING(MODERATE|MISSENSE|Cgc/Agc|R19S|510|yeeR|protein_coding|CODING|NP_416505.2|1|1)	GT:DP:AD:AF:RAF:SB:SC:PF	0	0	0	0	0	0.9954	0.99	1	1	0.9946	0	0	0	0.0045	0	0	0	0	0	0
NC_000913.3	2174941	gatA	NP_416597.1	GC	G	48.62	PASS	SN=0;STA=2174941;STO=2174942;TYP=DEL;R1P=125;R1M=137;R2P=120;R2M=148;AD=530;DP=11901;MCOV=-41;PPC=524;AF=0.0445;RAF=0.0000;LS=57430;MQS=31800;MQM=60;BQS=19633;BQM=39;EDS=16848;EDM=75;IDS=524141;IDM=992;CED=601;HMP=3;SB=0.9997;EFF=FRAME_SHIFT(HIGH||tgg/|W36|150|gatA|protein_coding|CODING|NP_416597.1|1|1);LOF=(gatA|b2094|1|1.00)	GT:DP:AD:AF:RAF:SB:SC:PF	0	0	0	0	0	0	0	0	0.9914	0.9946	0	0	0	0	0	0	0	0	0	0
NC_000913.3	2556836	eutC	NP_416935.1	C	G	58.31	PASS	SN=0;STA=2556835;STO=2556836;TYP=SUB;R1P=92;R1M=96;R2P=116;R2M=98;AD=402;DP=8275;MCOV=-41;PPC=396;AF=0.0486;RAF=0.0000;LS=45740;MQS=24120;MQM=60;BQS=14937;BQM=39;EDS=13189;EDM=74;IDS=397824;IDM=992;CED=601;HMP=0;SB=0.9999;EFF=NON_SYNONYMOUS_CODING(MODERATE|MISSENSE|caG/caC|Q154H|295|eutC|protein_coding|CODING|NP_416935.1|1|1)	GT:DP:AD:AF:RAF:SB:SC:PF	0	0	0	0	0	0	0	0	1	0.9946	0	0	0	0	0	0	0	0	0	0
NC_000913.3	3708598	0	0	G	A	57.68	PASS	SN=0;STA=3708597;STO=3708598;TYP=SUB;R1P=84;R1M=94;R2P=100;R2M=99;AD=377;DP=8286;MCOV=-41;PPC=374;AF=0.0455;RAF=0.0000;LS=43420;MQS=21288;MQM=60;BQS=13880;BQM=39;EDS=11453;EDM=74;IDS=372938;IDM=992;CED=601;HMP=1;SB=0.9999;EFF=INTERGENIC(MODIFIER||||||||||1)	GT:DP:AD:AF:RAF:SB:SC:PF	0.005	0	0	0	0	0	0	0	0.9795	0.9946	0	0	0	0	0	0	0	0	0	0
NC_000913.3	4420963	ulaA	NP_418614.4	G	C	57.7	PASS	SN=0;STA=4420962;STO=4420963;TYP=SUB;R1P=538;R1M=457;R2P=517;R2M=482;AD=1994;DP=8201;MCOV=-41;PPC=1981;AF=0.2431;RAF=0.0000;LS=197789;MQS=119613;MQM=60;BQS=72977;BQM=39;EDS=58410;EDM=75;IDS=1969964;IDM=992;CED=601;HMP=0;SB=0.9998;EFF=NON_SYNONYMOUS_CODING(MODERATE|MISSENSE|tgG/tgC|W328C|465|ulaA|protein_coding|CODING|NP_418614.4|1|1)	GT:DP:AD:AF:RAF:SB:SC:PF	0	0.0049	0	0	0	0.9943	1	1	1	0.9945	0.0053	0	0	0.005	0	0	0	0.0047	0	0
NC_000913.3	1447649	feaB	NP_415903.4	C	A	58.35	PASS	SN=0;STA=1447648;STO=1447649;TYP=SUB;R1P=83;R1M=118;R2P=86;R2M=109;AD=396;DP=8672;MCOV=-41;PPC=394;AF=0.0457;RAF=0.0000;LS=45011;MQS=23760;MQM=60;BQS=14528;BQM=39;EDS=12690;EDM=75;IDS=391585;IDM=992;CED=601;HMP=1;SB=0.9995;EFF=NON_SYNONYMOUS_CODING(MODERATE|MISSENSE|aCc/aAc|T44N|499|feaB|protein_coding|CODING|NP_415903.4|1|1)	GT:DP:AD:AF:RAF:SB:SC:PF	0	0	0.0044	0	0	0	0	0	1	0.9945	0	0	0	0	0	0	0	0	0	0
NC_000913.3	2110099	rfbC	NP_416542.1	G	T	59.06	PASS	SN=0;STA=2110098;STO=2110099;TYP=SUB;R1P=49;R1M=45;R2P=47;R2M=55;AD=196;DP=14672;MCOV=-41;PPC=196;AF=0.0134;RAF=0.0000;LS=26931;MQS=11760;MQM=60;BQS=7331;BQM=40;EDS=8291;EDM=75;IDS=194136;IDM=992;CED=601;HMP=0;SB=0.9999;EFF=NON_SYNONYMOUS_CODING(MODERATE|MISSENSE|Ctg/Atg|L14M|185|rfbC|protein_coding|CODING|NP_416542.1|1|1)	GT:DP:AD:AF:RAF:SB:SC:PF	0	0	0.0042	0.0069	0	0	0	0	0	0.9945	0	0.0024	0	0	0.0066	0	0	0.0047	0	0
NC_000913.3	3134138	yghT	NP_417460.1	C	T	58.69	PASS	SN=0;STA=3134137;STO=3134138;TYP=SUB;R1P=62;R1M=41;R2P=42;R2M=47;AD=192;DP=12464;MCOV=-41;PPC=192;AF=0.0154;RAF=0.0000;LS=26516;MQS=11520;MQM=60;BQS=7086;BQM=40;EDS=8029;EDM=75;IDS=189981;IDM=992;CED=601;HMP=1;SB=0.9997;EFF=NON_SYNONYMOUS_CODING(MODERATE|MISSENSE|tCa/tTa|S3L|230|yghT|protein_coding|CODING|NP_417460.1|1|1)	GT:DP:AD:AF:RAF:SB:SC:PF	0.0028	0	0.0028	0.0028	0	0	0	0	0	0.9945	0.0028	0	0	0	0	0	0	0	0	0.0031
NC_000913.3	4233843	pgi	NP_418449.1	A	T	58.09	PASS	SN=0;STA=4233842;STO=4233843;TYP=SUB;R1P=129;R1M=125;R2P=121;R2M=102;AD=477;DP=10308;MCOV=-41;PPC=474;AF=0.0463;RAF=0.0000;LS=52426;MQS=28620;MQM=60;BQS=17400;BQM=39;EDS=15674;EDM=75;IDS=471594;IDM=992;CED=601;HMP=1;SB=0.9998;EFF=NON_SYNONYMOUS_CODING(MODERATE|MISSENSE|gAt/gTt|D29V|549|pgi|protein_coding|CODING|NP_418449.1|1|1)	GT:DP:AD:AF:RAF:SB:SC:PF	0	0	0.0042	0	0	0	0.0038	0	0.9863	0.9945	0.0039	0	0	0	0	0	0	0	0	0
NC_000913.3	4544204	fimI	NP_418735.2	CG	C	46.47	PASS	SN=0;STA=4544204;STO=4544205;TYP=DEL;R1P=133;R1M=54;R2P=116;R2M=136;AD=439;DP=9110;MCOV=-41;PPC=437;AF=0.0482;RAF=0.0000;LS=48998;MQS=26340;MQM=60;BQS=15779;BQM=38;EDS=14976;EDM=75;IDS=434020;IDM=992;CED=601;HMP=4;SB=0.9995;EFF=FRAME_SHIFT(HIGH||ggg/|G160|179|fimI|protein_coding|CODING|NP_418735.2|1|1);LOF=(fimI|b4315|1|1.00)	GT:DP:AD:AF:RAF:SB:SC:PF	0	0	0.0079	0	0	0	0	0	0.9922	0.9945	0	0	0	0	0	0	0	0	0	0.0048
NC_000913.3	2103911	wbbK	NP_416536.1	G	T	46.69	PASS	SN=0;STA=2103910;STO=2103911;TYP=SUB;R1P=39;R1M=47;R2P=42;R2M=58;AD=186;DP=16955;MCOV=-41;PPC=186;AF=0.0110;RAF=0.0000;LS=25682;MQS=11112;MQM=60;BQS=6967;BQM=40;EDS=7332;EDM=75;IDS=184058;IDM=992;CED=601;HMP=4;SB=0.9995;EFF=NON_SYNONYMOUS_CODING(MODERATE|MISSENSE|aCa/aAa|T200K|372|wbbK|protein_coding|CODING|NP_416536.1|1|1)	GT:DP:AD:AF:RAF:SB:SC:PF	0.002	0	0	0	0	0.0018	0.0037	0.0054	0	0.9944	0	0	0.0018	0	0	0	0	0	0	0
NC_000913.3	3091383	rsmE	NP_417421.4	C	A	58.2	PASS	SN=0;STA=3091382;STO=3091383;TYP=SUB;R1P=90;R1M=117;R2P=84;R2M=113;AD=404;DP=9424;MCOV=-41;PPC=395;AF=0.0429;RAF=0.0000;LS=45692;MQS=24240;MQM=60;BQS=14916;BQM=39;EDS=13377;EDM=75;IDS=399457;IDM=992;CED=601;HMP=1;SB=0.9995;EFF=NON_SYNONYMOUS_CODING(MODERATE|MISSENSE|Cag/Aag|Q84K|243|rsmE|protein_coding|CODING|NP_417421.4|1|1)	GT:DP:AD:AF:RAF:SB:SC:PF	0	0.0046	0.0047	0.0091	0	0.005	0.0043	0	0.9953	0.9944	0	0.0045	0.0048	0	0	0.012	0	0	0.0138	0
NC_000913.3	3420531	yhdX	YP_026209.1	A	T	58.39	PASS	SN=0;STA=3420530;STO=3420531;TYP=SUB;R1P=130;R1M=110;R2P=88;R2M=102;AD=430;DP=9070;MCOV=-41;PPC=426;AF=0.0474;RAF=0.0000;LS=47820;MQS=25795;MQM=60;BQS=15918;BQM=39;EDS=13847;EDM=75;IDS=425188;IDM=992;CED=601;HMP=1;SB=0.9999;EFF=NON_SYNONYMOUS_CODING(MODERATE|MISSENSE|aAt/aTt|N133I|393|yhdX|protein_coding|CODING|YP_026209.1|1|1)	GT:DP:AD:AF:RAF:SB:SC:PF	0	0	0	0	0.0041	0	0	0	1	0.9944	0	0	0.0045	0	0	0	0	0	0	0
NC_000913.3	4154782	argE	NP_418392.1	G	A	58.27	PASS	SN=0;STA=4154781;STO=4154782;TYP=SUB;R1P=127;R1M=93;R2P=97;R2M=107;AD=424;DP=9504;MCOV=-41;PPC=420;AF=0.0446;RAF=0.0000;LS=47408;MQS=25440;MQM=60;BQS=15647;BQM=39;EDS=13979;EDM=74;IDS=419285;IDM=992;CED=601;HMP=0;SB=0.9998;EFF=SYNONYMOUS_CODING(LOW|SILENT|agC/agT|S22|383|argE|protein_coding|CODING|NP_418392.1|1|1)	GT:DP:AD:AF:RAF:SB:SC:PF	0	0	0	0	0	0	0	0	0.9919	0.9944	0	0	0	0	0	0	0	0	0	0
NC_000913.3	4506109	yjhC	NP_418700.2	C	T	58.03	PASS	SN=0;STA=4506108;STO=4506109;TYP=SUB;R1P=50;R1M=58;R2P=37;R2M=40;AD=185;DP=14065;MCOV=-41;PPC=185;AF=0.0132;RAF=0.0000;LS=25528;MQS=11095;MQM=60;BQS=6828;BQM=39;EDS=6888;EDM=74;IDS=183120;IDM=992;CED=601;HMP=0;SB=0.9998;EFF=STOP_GAINED(HIGH|NONSENSE|Caa/Taa|Q275*|372|yjhC|protein_coding|CODING|NP_418700.2|1|1)	GT:DP:AD:AF:RAF:SB:SC:PF	0.0025	0	0	0	0	0	0	0	0	0.9944	0	0.0052	0	0	0	0	0.0054	0	0	0
NC_000913.3	4551419	0	0	C	T	58.55	PASS	SN=0;STA=4551418;STO=4551419;TYP=SUB;R1P=109;R1M=93;R2P=127;R2M=83;AD=412;DP=10209;MCOV=-41;PPC=411;AF=0.0404;RAF=0.0000;LS=46276;MQS=24720;MQM=60;BQS=15441;BQM=40;EDS=13346;EDM=74;IDS=407254;IDM=992;CED=601;HMP=0;SB=0.9995;EFF=INTERGENIC(MODIFIER||||||||||1)	GT:DP:AD:AF:RAF:SB:SC:PF	0	0.004	0	0	0	0	0	0	1	0.9944	0	0	0	0	0	0	0	0	0	0
NC_000913.3	2536784	pdxK	NP_416913.1	G	A	57.41	PASS	SN=0;STA=2536783;STO=2536784;TYP=SUB;R1P=100;R1M=122;R2P=89;R2M=111;AD=422;DP=10068;MCOV=-41;PPC=421;AF=0.0419;RAF=0.0000;LS=47112;MQS=25320;MQM=60;BQS=15243;BQM=38;EDS=13598;EDM=74;IDS=417315;IDM=992;CED=601;HMP=1;SB=0.9996;EFF=SYNONYMOUS_CODING(LOW|SILENT|Ctg/Ttg|L152|283|pdxK|protein_coding|CODING|NP_416913.1|1|1)	GT:DP:AD:AF:RAF:SB:SC:PF	0	0	0	0	0	0	0	0	1	0.9943	0	0	0	0	0	0.0061	0	0	0	0
NC_000913.3	3247129	exuR	NP_417565.2	GC	G	58.17	PASS	SN=0;STA=3247129;STO=3247130;TYP=DEL;R1P=36;R1M=53;R2P=46;R2M=39;AD=174;DP=9608;MCOV=-41;PPC=174;AF=0.0181;RAF=0.0000;LS=24534;MQS=10440;MQM=60;BQS=6412;BQM=39;EDS=7083;EDM=75;IDS=172539;IDM=992;CED=601;HMP=1;SB=0.9998;EFF=FRAME_SHIFT(HIGH||gcg/|A160|258|exuR|protein_coding|CODING|NP_417565.2|1|1);LOF=(exuR|b3094|1|1.00)	GT:DP:AD:AF:RAF:SB:SC:PF	0	0	0	0	0	0	0	0	0	0.9943	0	0	0	0	0	0	0	0	0	0
NC_000913.3	4018600	rmuC	NP_418276.1	C	T	57.36	PASS	SN=0;STA=4018599;STO=4018600;TYP=SUB;R1P=36;R1M=40;R2P=43;R2M=55;AD=174;DP=9441;MCOV=-41;PPC=173;AF=0.0184;RAF=0.0000;LS=24472;MQS=10440;MQM=60;BQS=6321;BQM=39;EDS=6625;EDM=75;IDS=172514;IDM=992;CED=601;HMP=0;SB=0.9997;EFF=NON_SYNONYMOUS_CODING(MODERATE|MISSENSE|gCg/gTg|A423V|475|rmuC|protein_coding|CODING|NP_418276.1|1|1|WARNING_TRANSCRIPT_NO_START_CODON)	GT:DP:AD:AF:RAF:SB:SC:PF	0	0	0	0	0	0	0	0	0	0.9943	0	0	0	0	0	0	0	0	0	0
NC_000913.3	4064124	ompL	NP_418311.1	T	C	58.21	PASS	SN=0;STA=4064123;STO=4064124;TYP=SUB;R1P=130;R1M=115;R2P=139;R2M=127;AD=511;DP=11633;MCOV=-41;PPC=506;AF=0.0439;RAF=0.0000;LS=55033;MQS=30660;MQM=60;BQS=18806;BQM=40;EDS=15763;EDM=75;IDS=505029;IDM=992;CED=601;HMP=0;SB=0.9998;EFF=NON_SYNONYMOUS_CODING(MODERATE|MISSENSE|Acc/Gcc|T58A|230|ompL|protein_coding|CODING|NP_418311.1|1|1)	GT:DP:AD:AF:RAF:SB:SC:PF	0	0	0	0	0	0.0029	0.0031	0.0076	0.997	0.9942	0.0029	0	0.0029	0	0	0	0	0	0	0
NC_000913.3	584383	appY	NP_415096.1	G	A	58.53	PASS	SN=0;STA=584382;STO=584383;TYP=SUB;R1P=163;R1M=186;R2P=169;R2M=176;AD=694;DP=17453;MCOV=-41;PPC=693;AF=0.0398;RAF=0.0000;LS=71582;MQS=41635;MQM=60;BQS=25800;BQM=40;EDS=21029;EDM=75;IDS=685758;IDM=992;CED=601;HMP=1;SB=0.9998;EFF=NON_SYNONYMOUS_CODING(MODERATE|MISSENSE|Gag/Aag|E235K|249|appY|protein_coding|CODING|NP_415096.1|1|1)	GT:DP:AD:AF:RAF:SB:SC:PF	0	0	0.0033	0	0	0	0	0	1	0.9942	0.0016	0	0	0	0	0	0	0	0	0.002
NC_000913.3	2017317	fliI	NP_416451.1	G	T	57.66	PASS	SN=0;STA=2017316;STO=2017317;TYP=SUB;R1P=97;R1M=99;R2P=85;R2M=60;AD=341;DP=7092;MCOV=-41;PPC=334;AF=0.0481;RAF=0.0000;LS=39628;MQS=20460;MQM=60;BQS=12339;BQM=39;EDS=11552;EDM=75;IDS=337054;IDM=992;CED=601;HMP=0;SB=0.9997;EFF=NON_SYNONYMOUS_CODING(MODERATE|MISSENSE|cGc/cTc|R255L|457|fliI|protein_coding|CODING|NP_416451.1|1|1)	GT:DP:AD:AF:RAF:SB:SC:PF	0	0	0	0	0	0	0	0	1	0.9942	0	0	0.0069	0	0	0	0	0	0	0
NC_000913.3	18071	nhaA	NP_414560.1	G	T	57.96	PASS	SN=0;STA=18070;STO=18071;TYP=SUB;R1P=94;R1M=93;R2P=85;R2M=85;AD=357;DP=8451;MCOV=-41;PPC=355;AF=0.0422;RAF=0.0000;LS=40765;MQS=21420;MQM=60;BQS=13025;BQM=39;EDS=12442;EDM=74;IDS=352859;IDM=992;CED=601;HMP=0;SB=1.0000;EFF=NON_SYNONYMOUS_CODING(MODERATE|MISSENSE|Gcg/Tcg|A195S|388|nhaA|protein_coding|CODING|NP_414560.1|1|1|WARNING_TRANSCRIPT_NO_START_CODON)	GT:DP:AD:AF:RAF:SB:SC:PF	0.0047	0.0044	0	0	0	0	0	0	1	0.9941	0	0.0049	0	0	0	0	0	0	0	0
NC_000913.3	1052009	ymcE	NP_415511.1	C	A	58.38	PASS	SN=0;STA=1052008;STO=1052009;TYP=SUB;R1P=132;R1M=118;R2P=153;R2M=128;AD=531;DP=12015;MCOV=-41;PPC=530;AF=0.0442;RAF=0.0000;LS=56678;MQS=31860;MQM=60;BQS=19329;BQM=39;EDS=16707;EDM=75;IDS=524666;IDM=992;CED=601;HMP=1;SB=0.9997;EFF=NON_SYNONYMOUS_CODING(MODERATE|MISSENSE|Ccg/Acg|P55T|76|ymcE|protein_coding|CODING|NP_415511.1|1|1)	GT:DP:AD:AF:RAF:SB:SC:PF	0.003	0	0	0	0	0	0	0	1	0.9941	0	0.0033	0.0028	0	0.0065	0	0.0032	0	0	0.0032
NC_000913.3	1792520	nlpC	NP_416223.1	C	A	57.82	PASS	SN=0;STA=1792519;STO=1792520;TYP=SUB;R1P=96;R1M=110;R2P=106;R2M=110;AD=422;DP=8526;MCOV=-41;PPC=416;AF=0.0495;RAF=0.0000;LS=46668;MQS=25320;MQM=60;BQS=15452;BQM=39;EDS=13380;EDM=75;IDS=417177;IDM=992;CED=601;HMP=0;SB=0.9998;EFF=NON_SYNONYMOUS_CODING(MODERATE|MISSENSE|cGc/cTc|R71L|154|nlpC|protein_coding|CODING|NP_416223.1|1|1)	GT:DP:AD:AF:RAF:SB:SC:PF	0	0	0.0044	0	0	0	0	0	0.996	0.9941	0.0045	0	0	0	0	0	0	0	0	0
NC_000913.3	2143519	yegE	NP_416571.1	C	A	58.26	PASS	SN=0;STA=2143518;STO=2143519;TYP=SUB;R1P=86;R1M=112;R2P=76;R2M=111;AD=385;DP=8561;MCOV=-41;PPC=379;AF=0.0450;RAF=0.0000;LS=43450;MQS=23100;MQM=60;BQS=14041;BQM=39;EDS=13554;EDM=75;IDS=380798;IDM=992;CED=601;HMP=0;SB=0.9995;EFF=NON_SYNONYMOUS_CODING(MODERATE|MISSENSE|tCc/tAc|S85Y|1105|yegE|protein_coding|CODING|NP_416571.1|1|1)	GT:DP:AD:AF:RAF:SB:SC:PF	0	0	0	0	0	0	0	0	0.9907	0.9941	0	0	0	0.0047	0	0	0	0	0	0
NC_000913.3	3111527	yghE	b2969	C	T	56.78	PASS	SN=0;STA=3111526;STO=3111527;TYP=SUB;R1P=47;R1M=40;R2P=45;R2M=37;AD=169;DP=7416;MCOV=-41;PPC=169;AF=0.0228;RAF=0.0000;LS=23734;MQS=10140;MQM=60;BQS=5966;BQM=39;EDS=6320;EDM=75;IDS=167299;IDM=992;CED=601;HMP=1;SB=0.9997;EFF=SYNONYMOUS_CODING(LOW|SILENT|gtG/gtA|V188|320|yghE|protein_coding|CODING|b2969|1|1|WARNING_TRANSCRIPT_NO_START_CODON)	GT:DP:AD:AF:RAF:SB:SC:PF	0	0	0	0	0	0	0	0	0	0.9941	0	0	0	0	0	0	0	0	0	0
NC_000913.3	3899885	yieL	NP_418175.3	G	T	58.54	PASS	SN=0;STA=3899884;STO=3899885;TYP=SUB;R1P=113;R1M=114;R2P=105;R2M=91;AD=423;DP=9911;MCOV=-41;PPC=415;AF=0.0427;RAF=0.0000;LS=46833;MQS=25380;MQM=60;BQS=15742;BQM=39;EDS=14404;EDM=74;IDS=418235;IDM=992;CED=601;HMP=0;SB=0.9999;EFF=NON_SYNONYMOUS_CODING(MODERATE|MISSENSE|ttC/ttA|F231L|389|yieL|protein_coding|CODING|NP_418175.3|1|1)	GT:DP:AD:AF:RAF:SB:SC:PF	0	0	0	0	0	0.0041	0	0	0.996	0.9941	0	0	0	0	0.0042	0	0	0	0	0
NC_000913.3	3219759	patA	NP_417544.5	G	A	57.91	PASS	SN=0;STA=3219758;STO=3219759;TYP=SUB;R1P=438;R1M=589;R2P=420;R2M=559;AD=2006;DP=8395;MCOV=-41;PPC=1984;AF=0.2390;RAF=0.0000;LS=198427;MQS=120350;MQM=60;BQS=72680;BQM=39;EDS=57964;EDM=75;IDS=1980958;IDM=992;CED=601;HMP=1;SB=0.9995;EFF=NON_SYNONYMOUS_CODING(MODERATE|MISSENSE|gGa/gAa|G89E|459|patA|protein_coding|CODING|NP_417544.5|1|1)	GT:DP:AD:AF:RAF:SB:SC:PF	0	0	0	0	0	0.9953	0.991	0.9939	1	0.994	0.0051	0	0	0	0	0.0068	0	0	0	0
NC_000913.3	891086	ybjC	NP_415371.1	CG	C	57.8	PASS	SN=0;STA=891086;STO=891087;TYP=DEL;R1P=81;R1M=57;R2P=48;R2M=110;AD=296;DP=5765;MCOV=-41;PPC=296;AF=0.0513;RAF=0.0000;LS=35135;MQS=17760;MQM=60;BQS=10659;BQM=39;EDS=10641;EDM=75;IDS=292359;IDM=992;CED=601;HMP=1;SB=0.9995;EFF=FRAME_SHIFT(HIGH||gct/|A59|95|ybjC|protein_coding|CODING|NP_415371.1|1|1);LOF=(ybjC|b0850|1|1.00)	GT:DP:AD:AF:RAF:SB:SC:PF	0	0	0	0	0	0	0	0	0.9924	0.994	0	0	0	0	0	0	0	0	0	0
NC_000913.3	2269295	lpxT	NP_416679.4	G	T	58.09	PASS	SN=0;STA=2269294;STO=2269295;TYP=SUB;R1P=129;R1M=117;R2P=121;R2M=117;AD=484;DP=11418;MCOV=-41;PPC=480;AF=0.0424;RAF=0.0000;LS=52315;MQS=29040;MQM=60;BQS=17939;BQM=39;EDS=15249;EDM=74;IDS=478388;IDM=992;CED=601;HMP=0;SB=0.9999;EFF=NON_SYNONYMOUS_CODING(MODERATE|MISSENSE|Ggc/Tgc|G148C|237|lpxT|protein_coding|CODING|NP_416679.4|1|1)	GT:DP:AD:AF:RAF:SB:SC:PF	0	0	0.0029	0	0.003	0	0	0	1	0.994	0.0036	0	0	0.0036	0.0068	0	0.0075	0.0063	0.0035	0.0063
NC_000913.3	4064512	yihO	YP_026275.1	G	A	57.99	PASS	SN=0;STA=4064511;STO=4064512;TYP=SUB;R1P=136;R1M=145;R2P=143;R2M=109;AD=533;DP=12501;MCOV=-41;PPC=530;AF=0.0426;RAF=0.0000;LS=56708;MQS=31980;MQM=60;BQS=19570;BQM=39;EDS=16226;EDM=75;IDS=527027;IDM=992;CED=601;HMP=0;SB=0.9998;EFF=NON_SYNONYMOUS_CODING(MODERATE|MISSENSE|Cct/Tct|P419S|467|yihO|protein_coding|CODING|YP_026275.1|1|1)	GT:DP:AD:AF:RAF:SB:SC:PF	0	0	0	0	0	0	0	0	0.9973	0.994	0.0026	0	0	0	0	0	0	0.003	0	0
NC_000913.3	4253158	ubiA	NP_418464.1	T	G	58.41	PASS	SN=0;STA=4253157;STO=4253158;TYP=SUB;R1P=45;R1M=41;R2P=42;R2M=46;AD=174;DP=7642;MCOV=-41;PPC=174;AF=0.0228;RAF=0.0000;LS=24132;MQS=10440;MQM=60;BQS=6341;BQM=39;EDS=7303;EDM=75;IDS=172140;IDM=992;CED=601;HMP=0;SB=1.0000;EFF=NON_SYNONYMOUS_CODING(MODERATE|MISSENSE|aTc/aGc|I48S|290|ubiA|protein_coding|CODING|NP_418464.1|1|1)	GT:DP:AD:AF:RAF:SB:SC:PF	0	0.005	0.0068	0	0	0.0069	0	0	0	0.994	0	0	0.0064	0	0	0	0	0	0	0.0051
NC_000913.3	775542	tolQ	NP_415265.1	C	A	58.15	PASS	SN=0;STA=775541;STO=775542;TYP=SUB;R1P=496;R1M=496;R2P=437;R2M=528;AD=1957;DP=8051;MCOV=-41;PPC=1948;AF=0.2431;RAF=0.0000;LS=193315;MQS=117420;MQM=60;BQS=72609;BQM=39;EDS=57153;EDM=75;IDS=1933726;IDM=992;CED=601;HMP=0;SB=0.9998;EFF=SYNONYMOUS_CODING(LOW|SILENT|ctC/ctA|L130|230|tolQ|protein_coding|CODING|NP_415265.1|1|1|WARNING_TRANSCRIPT_NO_START_CODON)	GT:DP:AD:AF:RAF:SB:SC:PF	0.0096	0	0.0056	0	0.0051	0.9947	0.9845	1	1	0.9939	0	0.0052	0	0	0.0051	0	0	0	0	0
NC_000913.3	1635351	stfQ	NP_416065.1	G	C	57.9	PASS	SN=0;STA=1635350;STO=1635351;TYP=SUB;R1P=525;R1M=503;R2P=520;R2M=510;AD=2058;DP=10309;MCOV=-41;PPC=2048;AF=0.1996;RAF=0.0000;LS=203831;MQS=123422;MQM=60;BQS=75282;BQM=38;EDS=61189;EDM=75;IDS=2033337;IDM=992;CED=601;HMP=1;SB=0.9999;EFF=NON_SYNONYMOUS_CODING(MODERATE|MISSENSE|gCc/gGc|A166G|320|stfQ|protein_coding|CODING|NP_416065.1|1|1|WARNING_TRANSCRIPT_NO_START_CODON),INTRON(MODIFIER||||455|ydfJ|…	GT:DP:AD:AF:RAF:SB:SC:PF	0	0	0.0027	0	0	0.9951	1	1	1	0.9939	0	0	0	0.0058	0	0	0	0	0	0
NC_000913.3	3392186	0	0	G	T	56.87	PASS	SN=0;STA=3392185;STO=3392186;TYP=SUB;R1P=419;R1M=520;R2P=460;R2M=498;AD=1897;DP=7985;MCOV=-41;PPC=1887;AF=0.2376;RAF=0.0000;LS=188328;MQS=79581;MQM=60;BQS=67465;BQM=39;EDS=54460;EDM=75;IDS=1874508;IDM=992;CED=601;HMP=0;SB=0.9997;EFF=INTERGENIC(MODIFIER||||||||||1)	GT:DP:AD:AF:RAF:SB:SC:PF	0	0	0	0	0	1	0.9829	0.9936	0.9911	0.9939	0	0.0047	0	0	0	0	0.0043	0	0.0057	0
NC_000913.3	3803990	waaB	NP_418085.2	G	A	58.25	PASS	SN=0;STA=3803989;STO=3803990;TYP=SUB;R1P=180;R1M=166;R2P=181;R2M=148;AD=675;DP=16284;MCOV=-41;PPC=671;AF=0.0415;RAF=0.0000;LS=69464;MQS=40500;MQM=60;BQS=24802;BQM=39;EDS=20991;EDM=74;IDS=667299;IDM=992;CED=601;HMP=1;SB=0.9997;EFF=SYNONYMOUS_CODING(LOW|SILENT|Ctg/Ttg|L50|359|waaB|protein_coding|CODING|NP_418085.2|1|1)	GT:DP:AD:AF:RAF:SB:SC:PF	0	0	0	0.002	0	0	0	0.0074	1	0.9939	0	0	0.0019	0	0	0	0	0	0.002	0.002
NC_000913.3	4287459	0	0	A	G	57.79	PASS	SN=0;STA=4287458;STO=4287459;TYP=SUB;R1P=127;R1M=123;R2P=127;R2M=90;AD=467;DP=11370;MCOV=-41;PPC=466;AF=0.0411;RAF=0.0032;LS=50682;MQS=28020;MQM=60;BQS=16853;BQM=39;EDS=14537;EDM=75;IDS=461681;IDM=992;CED=601;HMP=1;SB=0.9997;EFF=INTERGENIC(MODIFIER||||||||||1)	GT:DP:AD:AF:RAF:SB:SC:PF	0.0029	0	0.0088	0	0	0	0	0	1	0.9939	0	0	0	0	0	0	0	0	0	0
NC_000913.3	68669	araB	NP_414605.1	G	A	56.67	PASS	SN=0;STA=68668;STO=68669;TYP=SUB;R1P=80;R1M=86;R2P=86;R2M=84;AD=336;DP=6717;MCOV=-41;PPC=333;AF=0.0500;RAF=0.0000;LS=38600;MQS=20140;MQM=60;BQS=11964;BQM=38;EDS=10739;EDM=75;IDS=332089;IDM=992;CED=601;HMP=0;SB=1.0000;EFF=SYNONYMOUS_CODING(LOW|SILENT|ggC/ggT|G460|566|araB|protein_coding|CODING|NP_414605.1|1|1)	GT:DP:AD:AF:RAF:SB:SC:PF	0	0.0077	0	0	0	0	0	0	1	0.9939	0	0	0	0	0	0	0	0	0	0
NC_000913.3	3995944	yigA	NP_418255.1	C	T	58.24	PASS	SN=0;STA=3995943;STO=3995944;TYP=SUB;R1P=78;R1M=75;R2P=87;R2M=91;AD=331;DP=7782;MCOV=-41;PPC=324;AF=0.0425;RAF=0.0000;LS=38097;MQS=19860;MQM=60;BQS=12025;BQM=39;EDS=11361;EDM=75;IDS=327176;IDM=992;CED=601;HMP=0;SB=1.0000;EFF=NON_SYNONYMOUS_CODING(MODERATE|MISSENSE|gCg/gTg|A121V|235|yigA|protein_coding|CODING|NP_418255.1|1|1)	GT:DP:AD:AF:RAF:SB:SC:PF	0	0	0	0.0062	0.0056	0	0	0	1	0.9939	0	0	0	0	0	0	0.0049	0	0	0
NC_000913.3	307039	ecpC	NP_414825.1	G	A	57.96	PASS	SN=0;STA=307038;STO=307039;TYP=SUB;R1P=121;R1M=87;R2P=85;R2M=93;AD=386;DP=7846;MCOV=-41;PPC=378;AF=0.0492;RAF=0.0000;LS=42896;MQS=23118;MQM=60;BQS=14306;BQM=39;EDS=12331;EDM=74;IDS=381375;IDM=992;CED=601;HMP=0;SB=0.9997;EFF=NON_SYNONYMOUS_CODING(MODERATE|MISSENSE|gCa/gTa|A765V|841|ecpC|protein_coding|CODING|NP_414825.1|1|1)	GT:DP:AD:AF:RAF:SB:SC:PF	0	0	0	0	0	0	0	0.0063	0.9912	0.9938	0	0	0	0	0	0	0	0	0.0066	0
NC_000913.3	2499286	ypdA	NP_416881.1	G	A	57.27	PASS	SN=0;STA=2499285;STO=2499286;TYP=SUB;R1P=95;R1M=69;R2P=73;R2M=88;AD=325;DP=7621;MCOV=-41;PPC=322;AF=0.0426;RAF=0.0000;LS=37573;MQS=19452;MQM=60;BQS=11683;BQM=39;EDS=11545;EDM=75;IDS=321246;IDM=992;CED=601;HMP=0;SB=0.9999;EFF=NON_SYNONYMOUS_CODING(MODERATE|MISSENSE|Gcc/Acc|A206T|565|ypdA|protein_coding|CODING|NP_416881.1|1|1|WARNING_TRANSCRIPT_NO_START_CODON)	GT:DP:AD:AF:RAF:SB:SC:PF	0	0	0	0	0	0	0	0	1	0.9938	0	0	0	0	0	0.0069	0	0	0	0
NC_000913.3	556983	folD	NP_415062.1	G	A	57.82	PASS	SN=0;STA=556982;STO=556983;TYP=SUB;R1P=33;R1M=51;R2P=28;R2M=50;AD=162;DP=8243;MCOV=-41;PPC=162;AF=0.0197;RAF=0.0000;LS=22790;MQS=9720;MQM=60;BQS=5971;BQM=39;EDS=6502;EDM=74;IDS=160623;IDM=992;CED=601;HMP=1;SB=0.9992;EFF=SYNONYMOUS_CODING(LOW|SILENT|gcC/gcT|A253|288|folD|protein_coding|CODING|NP_415062.1|1|1)	GT:DP:AD:AF:RAF:SB:SC:PF	0	0	0	0	0	0	0	0	0	0.9938	0	0	0	0	0	0	0	0	0	0
NC_000913.3	2314122	rcsD	NP_416720.1	A	T	50.92	PASS	SN=0;STA=2314121;STO=2314122;TYP=SUB;R1P=103;R1M=99;R2P=104;R2M=119;AD=425;DP=9342;MCOV=-41;PPC=425;AF=0.0455;RAF=0.0000;LS=46634;MQS=25500;MQM=60;BQS=15628;BQM=39;EDS=13320;EDM=75;IDS=419979;IDM=992;CED=601;HMP=2;SB=0.9999;EFF=NON_SYNONYMOUS_CODING(MODERATE|MISSENSE|tAc/tTc|Y212F|890|rcsD|protein_coding|CODING|NP_416720.1|1|1)	GT:DP:AD:AF:RAF:SB:SC:PF	0	0	0	0	0	0	0	0	1	0.9938	0.004	0	0	0	0	0	0.0043	0	0.0039	0
NC_000913.3	3141081	hybD	NP_417467.1	T	G	56.1	PASS	SN=0;STA=3141080;STO=3141081;TYP=SUB;R1P=83;R1M=94;R2P=89;R2M=107;AD=373;DP=8992;MCOV=-41;PPC=372;AF=0.0415;RAF=0.0000;LS=41821;MQS=22380;MQM=60;BQS=13190;BQM=39;EDS=12114;EDM=75;IDS=368355;IDM=992;CED=601;HMP=1;SB=0.9997;EFF=NON_SYNONYMOUS_CODING(MODERATE|MISSENSE|aAc/aCc|N69T|164|hybD|protein_coding|CODING|NP_417467.1|1|1)	GT:DP:AD:AF:RAF:SB:SC:PF	0.0092	0	0	0	0	0	0	0	1	0.9938	0	0	0	0	0	0	0	0	0	0.0047
NC_000913.3	3903840	bglF	NP_418178.1	C	A	57.58	PASS	SN=0;STA=3903839;STO=3903840;TYP=SUB;R1P=102;R1M=94;R2P=112;R2M=118;AD=426;DP=9442;MCOV=-41;PPC=419;AF=0.0451;RAF=0.0000;LS=46703;MQS=25560;MQM=60;BQS=15446;BQM=38;EDS=12951;EDM=74;IDS=421209;IDM=992;CED=601;HMP=0;SB=1.0000;EFF=NON_SYNONYMOUS_CODING(MODERATE|MISSENSE|gaG/gaT|E586D|625|bglF|protein_coding|CODING|NP_418178.1|1|1)	GT:DP:AD:AF:RAF:SB:SC:PF	0	0	0.0081	0	0	0.0075	0	0	1	0.9938	0.0047	0	0	0	0	0	0.0042	0	0.0124	0
NC_000913.3	4473694	bdcA	NP_418670.1	C	A	58.2	PASS	SN=0;STA=4473693;STO=4473694;TYP=SUB;R1P=99;R1M=115;R2P=79;R2M=95;AD=388;DP=9040;MCOV=-41;PPC=382;AF=0.0429;RAF=0.0000;LS=43335;MQS=23280;MQM=60;BQS=14284;BQM=39;EDS=13661;EDM=74;IDS=383829;IDM=992;CED=601;HMP=0;SB=0.9997;EFF=NON_SYNONYMOUS_CODING(MODERATE|MISSENSE|caG/caT|Q120H|237|bdcA|protein_coding|CODING|NP_418670.1|1|1)	GT:DP:AD:AF:RAF:SB:SC:PF	0	0	0	0	0.0046	0.0042	0	0	1	0.9938	0	0	0	0	0	0	0.0047	0.0139	0	0
NC_000913.3	665226	mrdB	NP_415167.1	C	A	58.15	PASS	SN=0;STA=665225;STO=665226;TYP=SUB;R1P=498;R1M=447;R2P=473;R2M=479;AD=1897;DP=7694;MCOV=-41;PPC=1887;AF=0.2466;RAF=0.0000;LS=188564;MQS=113820;MQM=60;BQS=69230;BQM=39;EDS=54657;EDM=74;IDS=1874055;IDM=992;CED=601;HMP=0;SB=0.9999;EFF=NON_SYNONYMOUS_CODING(MODERATE|MISSENSE|aGg/aTg|R363M|370|mrdB|protein_coding|CODING|NP_415167.1|1|1)	GT:DP:AD:AF:RAF:SB:SC:PF	0.01	0	0	0.0054	0	1	0.9942	1	1	0.9937	0	0	0.0055	0.0056	0.0058	0	0	0.0061	0	0.0059
NC_000913.3	4161236	fabR	NP_418398.2	C	A	58.06	PASS	SN=0;STA=4161235;STO=4161236;TYP=SUB;R1P=449;R1M=525;R2P=579;R2M=559;AD=2112;DP=8976;MCOV=-41;PPC=2100;AF=0.2353;RAF=0.0000;LS=206725;MQS=126703;MQM=60;BQS=77049;BQM=39;EDS=62291;EDM=75;IDS=2086010;IDM=992;CED=601;HMP=0;SB=0.9999;EFF=NON_SYNONYMOUS_CODING(MODERATE|MISSENSE|gCg/gAg|A38E|215|fabR|protein_coding|CODING|NP_418398.2|1|1)	GT:DP:AD:AF:RAF:SB:SC:PF	0	0.0045	0	0	0	0.9906	0.9912	1	0.9959	0.9937	0.0043	0	0	0.0089	0	0	0.0044	0.009	0.0044	0
NC_000913.3	443485	yajL	NP_414958.4	GC	G	57.96	PASS	SN=0;STA=443485;STO=443486;TYP=DEL;R1P=75;R1M=83;R2P=85;R2M=80;AD=323;DP=7723;MCOV=-41;PPC=321;AF=0.0418;RAF=0.0000;LS=37198;MQS=19380;MQM=60;BQS=11915;BQM=39;EDS=11229;EDM=75;IDS=319470;IDM=992;CED=601;HMP=1;SB=1.0000;EFF=FRAME_SHIFT(HIGH||aag/|K52|196|yajL|protein_coding|CODING|NP_414958.4|1|1);LOF=(yajL|b0424|1|1.00)	GT:DP:AD:AF:RAF:SB:SC:PF	0	0	0	0	0	0	0	0	1	0.9937	0	0	0	0	0	0	0	0	0	0
NC_000913.3	3031446	uacT	NP_417364.2	C	A	58.15	PASS	SN=0;STA=3031445;STO=3031446;TYP=SUB;R1P=40;R1M=62;R2P=43;R2M=43;AD=188;DP=10454;MCOV=-41;PPC=187;AF=0.0180;RAF=0.0000;LS=25001;MQS=11280;MQM=60;BQS=7084;BQM=39;EDS=6963;EDM=74;IDS=186126;IDM=992;CED=601;HMP=1;SB=0.9996;EFF=NON_SYNONYMOUS_CODING(MODERATE|MISSENSE|cCa/cAa|P27Q|482|uacT|protein_coding|CODING|NP_417364.2|1|1)	GT:DP:AD:AF:RAF:SB:SC:PF	0.0135	0.0103	0.0035	0	0.0198	0	0.0072	0	0.0036	0.9937	0.0061	0.0039	0.0109	0	0.0068	0	0.004	0.0034	0	0.0039
NC_000913.3	3050678	0	0	T	G	58.17	PASS	SN=0;STA=3050677;STO=3050678;TYP=SUB;R1P=123;R1M=85;R2P=119;R2M=105;AD=432;DP=9495;MCOV=-41;PPC=427;AF=0.0455;RAF=0.0000;LS=47131;MQS=25920;MQM=60;BQS=16122;BQM=39;EDS=13291;EDM=75;IDS=427194;IDM=992;CED=601;HMP=0;SB=0.9996;EFF=INTERGENIC(MODIFIER||||||||||1)	GT:DP:AD:AF:RAF:SB:SC:PF	0	0	0	0	0	0	0	0	0.9964	0.9937	0	0	0	0	0	0	0	0	0	0.0041
NC_000913.3	4538406	nanM	NP_418730.4	C	T	58.33	PASS	SN=0;STA=4538405;STO=4538406;TYP=SUB;R1P=115;R1M=147;R2P=118;R2M=122;AD=502;DP=11285;MCOV=-41;PPC=495;AF=0.0445;RAF=0.0000;LS=53493;MQS=30120;MQM=60;BQS=18709;BQM=39;EDS=15979;EDM=75;IDS=496157;IDM=992;CED=601;HMP=1;SB=0.9997;EFF=SYNONYMOUS_CODING(LOW|SILENT|ttG/ttA|L120|368|nanM|protein_coding|CODING|NP_418730.4|1|1)	GT:DP:AD:AF:RAF:SB:SC:PF	0	0.0031	0	0.0033	0	0	0.003	0	1	0.9937	0	0.0035	0	0	0	0	0.0036	0	0	0
NC_000913.3	2327207	atoB	NP_416728.1	C	A	55.97	PASS	SN=0;STA=2327206;STO=2327207;TYP=SUB;R1P=456;R1M=504;R2P=450;R2M=472;AD=1882;DP=7947;MCOV=-41;PPC=1873;AF=0.2368;RAF=0.0000;LS=186985;MQS=112920;MQM=60;BQS=67267;BQM=39;EDS=54659;EDM=75;IDS=1839737;IDM=992;CED=601;HMP=1;SB=0.9999;EFF=NON_SYNONYMOUS_CODING(MODERATE|MISSENSE|Cag/Aag|Q367K|394|atoB|protein_coding|CODING|NP_416728.1|1|1)	GT:DP:AD:AF:RAF:SB:SC:PF	0	0	0	0.0054	0.005	0.9948	0.9884	0.9821	0.9945	0.9936	0	0	0	0	0.0043	0	0	0.0119	0	0
NC_000913.3	437753	yajO	NP_414953.2	C	T	58.01	PASS	SN=0;STA=437752;STO=437753;TYP=SUB;R1P=85;R1M=106;R2P=76;R2M=84;AD=351;DP=9073;MCOV=-41;PPC=345;AF=0.0387;RAF=0.0000;LS=39656;MQS=21060;MQM=60;BQS=12946;BQM=39;EDS=11464;EDM=75;IDS=347161;IDM=992;CED=601;HMP=0;SB=0.9997;EFF=NON_SYNONYMOUS_CODING(MODERATE|MISSENSE|cGc/cAc|R128H|324|yajO|protein_coding|CODING|NP_414953.2|1|1)	GT:DP:AD:AF:RAF:SB:SC:PF	0	0	0	0	0	0	0	0	1	0.9936	0	0	0	0	0	0	0	0	0.0094	0.0042
NC_000913.3	1868100	yeaG	NP_416297.1	C	T	57.95	PASS	SN=0;STA=1868099;STO=1868100;TYP=SUB;R1P=120;R1M=96;R2P=112;R2M=82;AD=410;DP=10276;MCOV=-41;PPC=403;AF=0.0399;RAF=0.0000;LS=45051;MQS=24600;MQM=60;BQS=15150;BQM=39;EDS=13166;EDM=75;IDS=405343;IDM=992;CED=601;HMP=0;SB=0.9995;EFF=NON_SYNONYMOUS_CODING(MODERATE|MISSENSE|cCc/cTc|P398L|644|yeaG|protein_coding|CODING|NP_416297.1|1|1)	GT:DP:AD:AF:RAF:SB:SC:PF	0	0	0	0	0	0	0	0	1	0.9936	0	0	0	0	0	0	0.0043	0	0	0
NC_000913.3	1295459	adhE	NP_415757.1	T	A	58.06	PASS	SN=0;STA=1295458;STO=1295459;TYP=SUB;R1P=462;R1M=522;R2P=567;R2M=451;AD=2002;DP=8610;MCOV=-41;PPC=1996;AF=0.2325;RAF=0.0000;LS=197129;MQS=120120;MQM=60;BQS=73755;BQM=39;EDS=56901;EDM=75;IDS=1978268;IDM=992;CED=601;HMP=0;SB=0.9999;EFF=NON_SYNONYMOUS_CODING(MODERATE|MISSENSE|aAa/aTa|K888I|891|adhE|protein_coding|CODING|NP_415757.1|1|1)	GT:DP:AD:AF:RAF:SB:SC:PF	0	0	0	0	0	1	0.9859	1	0.9945	0.9935	0	0	0	0	0	0	0	0	0	0
NC_000913.3	2387517	0	0	G	T	57.76	PASS	SN=0;STA=2387516;STO=2387517;TYP=SUB;R1P=134;R1M=129;R2P=122;R2M=112;AD=497;DP=13639;MCOV=-41;PPC=490;AF=0.0364;RAF=0.0034;LS=52948;MQS=29820;MQM=60;BQS=18171;BQM=39;EDS=16035;EDM=74;IDS=491110;IDM=992;CED=601;HMP=1;SB=0.9999;EFF=INTERGENIC(MODIFIER||||||||||1)	GT:DP:AD:AF:RAF:SB:SC:PF	0	0	0.0024	0	0	0.0025	0	0.0067	1	0.9935	0	0	0	0.0049	0	0	0.0055	0	0.0028	0.0027
NC_000913.3	2334322	yfaS	b4500	G	A	58.19	PASS	SN=0;STA=2334321;STO=2334322;TYP=SUB;R1P=99;R1M=87;R2P=98;R2M=101;AD=385;DP=9248;MCOV=-41;PPC=382;AF=0.0416;RAF=0.0045;LS=42694;MQS=23100;MQM=60;BQS=14338;BQM=39;EDS=12673;EDM=75;IDS=380673;IDM=992;CED=601;HMP=0;SB=0.9999;EFF=SYNONYMOUS_CODING(LOW|SILENT|tcC/tcT|S27|1534|yfaS|protein_coding|CODING|b4500|1|1)	GT:DP:AD:AF:RAF:SB:SC:PF	0.0045	0	0	0	0	0	0	0.0064	1	0.9935	0	0	0	0	0.0047	0	0	0	0	0
NC_000913.3	1724506	sodC	NP_416163.1	C	T	57.72	PASS	SN=0;STA=1724505;STO=1724506;TYP=SUB;R1P=98;R1M=79;R2P=101;R2M=90;AD=368;DP=7700;MCOV=-41;PPC=363;AF=0.0478;RAF=0.0045;LS=41149;MQS=22080;MQM=60;BQS=13556;BQM=39;EDS=11305;EDM=75;IDS=363669;IDM=992;CED=601;HMP=0;SB=0.9997;EFF=SYNONYMOUS_CODING(LOW|SILENT|ctG/ctA|L50|173|sodC|protein_coding|CODING|NP_416163.1|1|1)	GT:DP:AD:AF:RAF:SB:SC:PF	0.0053	0	0	0	0	0	0	0	1	0.9935	0	0	0	0	0	0.0072	0	0	0	0
NC_000913.3	2783406	0	0	A	G	57.77	PASS	SN=0;STA=2783405;STO=2783406;TYP=SUB;R1P=133;R1M=116;R2P=129;R2M=120;AD=498;DP=12061;MCOV=-41;PPC=495;AF=0.0413;RAF=0.0036;LS=52923;MQS=29880;MQM=60;BQS=18584;BQM=40;EDS=15134;EDM=75;IDS=492356;IDM=992;CED=601;HMP=0;SB=0.9998;EFF=INTERGENIC(MODIFIER||||||||||1)	GT:DP:AD:AF:RAF:SB:SC:PF	0	0	0	0	0	0	0	0	0.9971	0.9935	0	0	0	0	0	0	0	0	0	0
NC_000913.3	553101	0	0	G	A	57.33	PASS	SN=0;STA=553100;STO=553101;TYP=SUB;R1P=76;R1M=86;R2P=90;R2M=92;AD=344;DP=7548;MCOV=-41;PPC=335;AF=0.0456;RAF=0.0000;LS=38900;MQS=20640;MQM=60;BQS=12575;BQM=39;EDS=11243;EDM=75;IDS=339943;IDM=992;CED=601;HMP=0;SB=0.9999;EFF=INTERGENIC(MODIFIER||||||||||1)	GT:DP:AD:AF:RAF:SB:SC:PF	0	0	0	0	0	0	0	0	1	0.9935	0	0	0	0	0	0	0	0	0	0.0062
NC_000913.3	1318903	trpC	NP_415778.3	G	A	57.63	PASS	SN=0;STA=1318902;STO=1318903;TYP=SUB;R1P=53;R1M=32;R2P=43;R2M=31;AD=159;DP=7426;MCOV=-41;PPC=159;AF=0.0214;RAF=0.0000;LS=22152;MQS=9540;MQM=60;BQS=5844;BQM=39;EDS=6185;EDM=73;IDS=157380;IDM=992;CED=601;HMP=0;SB=0.9993;EFF=STOP_GAINED(HIGH|NONSENSE|Cag/Tag|Q296*|453|trpC|protein_coding|CODING|NP_415778.3|1|1)	GT:DP:AD:AF:RAF:SB:SC:PF	0	0	0	0	0	0.0056	0	0	0	0.9935	0	0	0.0117	0	0	0	0	0	0	0
NC_000913.3	3327892	yhbY	NP_417647.1	G	A	57.93	PASS	SN=0;STA=3327891;STO=3327892;TYP=SUB;R1P=132;R1M=114;R2P=127;R2M=123;AD=496;DP=10780;MCOV=-41;PPC=493;AF=0.0460;RAF=0.0000;LS=52757;MQS=29760;MQM=60;BQS=18055;BQM=39;EDS=15314;EDM=75;IDS=490072;IDM=992;CED=601;HMP=0;SB=0.9998;EFF=NON_SYNONYMOUS_CODING(MODERATE|MISSENSE|Gcc/Acc|A35T|97|yhbY|protein_coding|CODING|NP_417647.1|1|1)	GT:DP:AD:AF:RAF:SB:SC:PF	0	0	0	0	0.003	0.0064	0	0	0.9912	0.9935	0.0034	0	0	0	0	0	0.0034	0	0	0
NC_000913.3	200812	skp	NP_414720.1	G	T	57.93	PASS	SN=0;STA=200811;STO=200812;TYP=SUB;R1P=494;R1M=567;R2P=477;R2M=544;AD=2082;DP=8625;MCOV=-41;PPC=2074;AF=0.2414;RAF=0.0000;LS=205676;MQS=124920;MQM=60;BQS=76562;BQM=39;EDS=58644;EDM=75;IDS=2054040;IDM=992;CED=601;HMP=0;SB=0.9997;EFF=STOP_GAINED(HIGH|NONSENSE|Gaa/Taa|E111*|161|skp|protein_coding|CODING|NP_414720.1|1|1|WARNING_TRANSCRIPT_NO_START_CODON)	GT:DP:AD:AF:RAF:SB:SC:PF	0	0	0	0	0	0.9895	0.9914	1	1	0.9934	0	0	0.0046	0.0109	0	0	0.0044	0	0	0
NC_000913.3	3959403	ilvC	NP_418222.1	C	T	57.22	PASS	SN=0;STA=3959402;STO=3959403;TYP=SUB;R1P=86;R1M=97;R2P=76;R2M=84;AD=343;DP=8627;MCOV=-41;PPC=342;AF=0.0398;RAF=0.0000;LS=38750;MQS=20580;MQM=60;BQS=12540;BQM=39;EDS=10333;EDM=74;IDS=338677;IDM=992;CED=601;HMP=0;SB=0.9998;EFF=SYNONYMOUS_CODING(LOW|SILENT|cgC/cgT|R478|491|ilvC|protein_coding|CODING|NP_418222.1|1|1)	GT:DP:AD:AF:RAF:SB:SC:PF	0	0	0	0.0047	0	0	0.005	0.0068	1	0.9934	0	0	0	0.005	0	0	0	0	0	0
NC_000913.3	2382368	rbn	NP_416771.4	C	T	57.57	PASS	SN=0;STA=2382367;STO=2382368;TYP=SUB;R1P=105;R1M=89;R2P=104;R2M=80;AD=378;DP=8434;MCOV=-41;PPC=372;AF=0.0448;RAF=0.0052;LS=41803;MQS=22680;MQM=60;BQS=13561;BQM=39;EDS=12920;EDM=74;IDS=373772;IDM=992;CED=601;HMP=1;SB=0.9996;EFF=NON_SYNONYMOUS_CODING(MODERATE|MISSENSE|gCt/gTt|A254V|305|rbn|protein_coding|CODING|NP_416771.4|1|1)	GT:DP:AD:AF:RAF:SB:SC:PF	0	0	0	0	0	0	0	0.006	0.9825	0.9934	0	0	0	0	0	0	0	0	0	0
NC_000913.3	2579069	talA	NP_416959.1	C	A	58.14	PASS	SN=0;STA=2579068;STO=2579069;TYP=SUB;R1P=100;R1M=124;R2P=102;R2M=122;AD=448;DP=10297;MCOV=-41;PPC=445;AF=0.0435;RAF=0.0077;LS=48098;MQS=26848;MQM=60;BQS=16300;BQM=39;EDS=14400;EDM=75;IDS=442803;IDM=992;CED=601;HMP=1;SB=0.9996;EFF=NON_SYNONYMOUS_CODING(MODERATE|MISSENSE|aCc/aAc|T135N|316|talA|protein_coding|CODING|NP_416959.1|1|1)	GT:DP:AD:AF:RAF:SB:SC:PF	0.0037	0.0039	0	0	0.0073	0.0035	0	0	0.9931	0.9934	0	0	0	0	0	0	0.0044	0	0	0
NC_000913.3	1422107	ydaV	NP_415878.1	G	A	57.91	PASS	SN=0;STA=1422106;STO=1422107;TYP=SUB;R1P=32;R1M=40;R2P=43;R2M=37;AD=152;DP=8962;MCOV=-41;PPC=152;AF=0.0170;RAF=0.0000;LS=21382;MQS=9120;MQM=60;BQS=5656;BQM=39;EDS=5984;EDM=75;IDS=150638;IDM=992;CED=601;HMP=0;SB=0.9999;EFF=NON_SYNONYMOUS_CODING(MODERATE|MISSENSE|cGt/cAt|R42H|248|ydaV|protein_coding|CODING|NP_415878.1|1|1)	GT:DP:AD:AF:RAF:SB:SC:PF	0	0	0	0	0	0	0	0	0	0.9934	0	0	0	0	0	0	0	0	0	0
NC_000913.3	2855491	fhlA	NP_417211.1	GC	G	57.86	PASS	SN=0;STA=2855491;STO=2855492;TYP=DEL;R1P=83;R1M=99;R2P=86;R2M=84;AD=352;DP=8257;MCOV=-41;PPC=345;AF=0.0426;RAF=0.0000;LS=39558;MQS=21120;MQM=60;BQS=12986;BQM=39;EDS=11393;EDM=75;IDS=348109;IDM=992;CED=601;HMP=1;SB=0.9998;EFF=FRAME_SHIFT(HIGH||agc/|S385|692|fhlA|protein_coding|CODING|NP_417211.1|1|1);LOF=(fhlA|b2731|1|1.00)	GT:DP:AD:AF:RAF:SB:SC:PF	0	0	0	0	0	0	0	0	1	0.9934	0	0	0	0	0	0	0	0	0	0
NC_000913.3	3091234	rsmE	NP_417421.4	TG	T	44.67	PASS	SN=0;STA=3091234;STO=3091235;TYP=DEL;R1P=77;R1M=93;R2P=87;R2M=101;AD=358;DP=8469;MCOV=-41;PPC=356;AF=0.0423;RAF=0.0000;LS=40036;MQS=21480;MQM=60;BQS=13186;BQM=38;EDS=12031;EDM=75;IDS=354060;IDM=992;CED=601;HMP=5;SB=0.9997;EFF=FRAME_SHIFT(HIGH||atg/|M34|243|rsmE|protein_coding|CODING|NP_417421.4|1|1);LOF=(rsmE|b2946|1|1.00)	GT:DP:AD:AF:RAF:SB:SC:PF	0	0	0	0	0.0056	0	0	0	1	0.9934	0	0	0	0	0	0	0.0101	0.0048	0	0
NC_000913.3	3105154	mltC	NP_417438.2	C	G	57.17	PASS	SN=0;STA=3105153;STO=3105154;TYP=SUB;R1P=91;R1M=94;R2P=98;R2M=97;AD=380;DP=9265;MCOV=-41;PPC=378;AF=0.0410;RAF=0.0000;LS=42030;MQS=22800;MQM=60;BQS=13770;BQM=39;EDS=12919;EDM=75;IDS=372127;IDM=992;CED=601;HMP=1;SB=1.0000;EFF=NON_SYNONYMOUS_CODING(MODERATE|MISSENSE|gCc/gGc|A241G|359|mltC|protein_coding|CODING|NP_417438.2|1|1)	GT:DP:AD:AF:RAF:SB:SC:PF	0	0	0	0	0	0	0	0	0.9956	0.9934	0	0	0	0	0	0	0	0	0.0048	0
NC_000913.3	3266796	tdcA	NP_417588.1	A	G	57.51	PASS	SN=0;STA=3266795;STO=3266796;TYP=SUB;R1P=163;R1M=121;R2P=160;R2M=114;AD=558;DP=14001;MCOV=-41;PPC=554;AF=0.0399;RAF=0.0000;LS=58156;MQS=33471;MQM=60;BQS=20450;BQM=39;EDS=17576;EDM=74;IDS=550805;IDM=992;CED=601;HMP=0;SB=0.9995;EFF=SYNONYMOUS_CODING(LOW|SILENT|ggT/ggC|G90|312|tdcA|protein_coding|CODING|NP_417588.1|1|1)	GT:DP:AD:AF:RAF:SB:SC:PF	0.0025	0	0	0.0026	0	0	0	0	0.9951	0.9933	0	0	0	0	0	0	0	0	0	0.0025
NC_000913.3	4245027	malF	NP_418457.1	A	G	57.82	PASS	SN=0;STA=4245026;STO=4245027;TYP=SUB;R1P=92;R1M=83;R2P=115;R2M=108;AD=398;DP=9023;MCOV=-41;PPC=396;AF=0.0441;RAF=0.0000;LS=43565;MQS=23880;MQM=60;BQS=14750;BQM=39;EDS=12501;EDM=74;IDS=393419;IDM=992;CED=601;HMP=0;SB=0.9998;EFF=NON_SYNONYMOUS_CODING(MODERATE|MISSENSE|Tgg/Cgg|W17R|514|malF|protein_coding|CODING|NP_418457.1|1|1)	GT:DP:AD:AF:RAF:SB:SC:PF	0	0	0	0	0	0	0	0	1	0.9933	0	0	0	0.0092	0	0	0	0	0	0
NC_000913.3	4542497	fimE	NP_418733.1	G	C	40.77	PASS	SN=0;STA=4542496;STO=4542497;TYP=SUB;R1P=138;R1M=105;R2P=141;R2M=94;AD=478;DP=11877;MCOV=-41;PPC=331;AF=0.0402;RAF=0.0000;LS=50895;MQS=28680;MQM=60;BQS=17426;BQM=39;EDS=14394;EDM=74;IDS=472491;IDM=992;CED=601;HMP=1;SB=0.9994;EFF=NON_SYNONYMOUS_CODING(MODERATE|MISSENSE|cGt/cCt|R154P|198|fimE|protein_coding|CODING|NP_418733.1|1|1|WARNING_TRANSCRIPT_NO_START_CODON)	GT:DP:AD:AF:RAF:SB:SC:PF	0	0.0028	0	0	0	0	0	0	0.9909	0.9933	0	0	0	0	0	0	0	0	0	0
NC_000913.3	4555727	yjiC	NP_418745.3	T	G	57.62	PASS	SN=0;STA=4555726;STO=4555727;TYP=SUB;R1P=773;R1M=745;R2P=704;R2M=699;AD=2921;DP=12963;MCOV=-41;PPC=2901;AF=0.2253;RAF=0.0032;LS=280275;MQS=175260;MQM=60;BQS=106234;BQM=38;EDS=83499;EDM=75;IDS=2886007;IDM=992;CED=601;HMP=0;SB=1.0000;EFF=SYNONYMOUS_CODING(LOW|SILENT|gtA/gtC|V198|276|yjiC|protein_coding|CODING|NP_418745.3|1|1)	GT:DP:AD:AF:RAF:SB:SC:PF	0	0	0.0025	0	0.0026	1	0.9948	1	0.9972	0.9932	0	0	0	0	0	0	0	0	0	0
NC_000913.3	1162587	ycfL	NP_415622.1	TG	T	43.14	PASS	SN=0;STA=1162587;STO=1162588;TYP=DEL;R1P=365;R1M=611;R2P=382;R2M=580;AD=1938;DP=8305;MCOV=-41;PPC=1930;AF=0.2334;RAF=0.0000;LS=191365;MQS=116257;MQM=60;BQS=70169;BQM=39;EDS=59874;EDM=75;IDS=1895037;IDM=989;CED=601;HMP=6;SB=0.9993;EFF=FRAME_SHIFT(HIGH||ctg/|L114|125|ycfL|protein_coding|CODING|NP_415622.1|1|1);LOF=(ycfL|b1104|1|1.00)	GT:DP:AD:AF:RAF:SB:SC:PF	0	0	0.0056	0.0053	0	0.9686	0.9779	1	0.9892	0.9932	0	0	0	0	0	0	0	0	0.0087	0
NC_000913.3	475670	ybaY	NP_414987.3	C	T	57.93	PASS	SN=0;STA=475669;STO=475670;TYP=SUB;R1P=86;R1M=105;R2P=79;R2M=99;AD=369;DP=8707;MCOV=-41;PPC=363;AF=0.0424;RAF=0.0000;LS=40793;MQS=22140;MQM=60;BQS=13701;BQM=39;EDS=11533;EDM=75;IDS=364792;IDM=992;CED=601;HMP=0;SB=0.9996;EFF=NON_SYNONYMOUS_CODING(MODERATE|MISSENSE|Cca/Tca|P98S|190|ybaY|protein_coding|CODING|NP_414987.3|1|1)	GT:DP:AD:AF:RAF:SB:SC:PF	0	0	0.0045	0	0	0	0	0.0066	0.9955	0.9932	0	0	0	0	0	0	0	0	0	0
NC_000913.3	1181445	ymfA	NP_415640.2	T	C	57.61	PASS	SN=0;STA=1181444;STO=1181445;TYP=SUB;R1P=114;R1M=120;R2P=127;R2M=127;AD=488;DP=12244;MCOV=-41;PPC=484;AF=0.0399;RAF=0.0034;LS=51691;MQS=29280;MQM=60;BQS=17796;BQM=39;EDS=14919;EDM=75;IDS=482233;IDM=992;CED=601;HMP=1;SB=1.0000;EFF=NON_SYNONYMOUS_CODING(MODERATE|MISSENSE|gAt/gGt|D94G|153|ymfA|protein_coding|CODING|NP_415640.2|1|1)	GT:DP:AD:AF:RAF:SB:SC:PF	0	0.0033	0	0	0	0	0	0	1	0.9932	0	0	0.0026	0	0	0	0	0	0	0
NC_000913.3	200838	skp	NP_414720.1	T	C	57.29	PASS	SN=0;STA=200837;STO=200838;TYP=SUB;R1P=72;R1M=100;R2P=88;R2M=87;AD=347;DP=8692;MCOV=-41;PPC=345;AF=0.0399;RAF=0.0000;LS=38877;MQS=20820;MQM=60;BQS=12741;BQM=39;EDS=11190;EDM=74;IDS=340776;IDM=992;CED=601;HMP=0;SB=0.9997;EFF=SYNONYMOUS_CODING(LOW|SILENT|cgT/cgC|R119|161|skp|protein_coding|CODING|NP_414720.1|1|1|WARNING_TRANSCRIPT_NO_START_CODON)	GT:DP:AD:AF:RAF:SB:SC:PF	0	0	0	0	0	0	0	0	1	0.9932	0	0	0	0	0	0.0065	0	0	0	0.0048
NC_000913.3	830165	ybiH	NP_415317.4	G	T	57.68	PASS	SN=0;STA=830164;STO=830165;TYP=SUB;R1P=36;R1M=35;R2P=49;R2M=28;AD=148;DP=7974;MCOV=-41;PPC=147;AF=0.0186;RAF=0.0000;LS=20768;MQS=8880;MQM=60;BQS=5463;BQM=39;EDS=5950;EDM=75;IDS=146735;IDM=992;CED=601;HMP=0;SB=0.9995;EFF=NON_SYNONYMOUS_CODING(MODERATE|MISSENSE|gCc/gAc|A160D|223|ybiH|protein_coding|CODING|NP_415317.4|1|1)	GT:DP:AD:AF:RAF:SB:SC:PF	0	0	0	0	0	0	0	0	0	0.9932	0	0	0	0	0.0053	0	0	0	0	0
NC_000913.3	1711757	nth	NP_416150.1	A	C	56.15	PASS	SN=0;STA=1711756;STO=1711757;TYP=SUB;R1P=113;R1M=93;R2P=101;R2M=106;AD=413;DP=9476;MCOV=-41;PPC=408;AF=0.0436;RAF=0.0000;LS=44810;MQS=24780;MQM=60;BQS=14476;BQM=39;EDS=13332;EDM=74;IDS=408049;IDM=992;CED=601;HMP=0;SB=0.9999;EFF=NON_SYNONYMOUS_CODING(MODERATE|MISSENSE|Att/Ctt|I79L|211|nth|protein_coding|CODING|NP_416150.1|1|1)	GT:DP:AD:AF:RAF:SB:SC:PF	0	0.0045	0	0	0	0	0	0	1	0.9932	0	0	0	0	0	0	0	0.0046	0	0
NC_000913.3	1967555	cheB	NP_416397.1	C	T	56.12	PASS	SN=0;STA=1967554;STO=1967555;TYP=SUB;R1P=72;R1M=77;R2P=80;R2M=67;AD=296;DP=7348;MCOV=-41;PPC=293;AF=0.0403;RAF=0.0000;LS=34235;MQS=17760;MQM=60;BQS=10605;BQM=39;EDS=10013;EDM=75;IDS=292603;IDM=992;CED=601;HMP=0;SB=0.9999;EFF=NON_SYNONYMOUS_CODING(MODERATE|MISSENSE|cGc/cAc|R316H|349|cheB|protein_coding|CODING|NP_416397.1|1|1)	GT:DP:AD:AF:RAF:SB:SC:PF	0	0	0	0	0	0	0	0	1	0.9932	0	0	0	0	0	0	0	0	0	0
NC_000913.3	2329234	yfaQ	NP_416730.1	G	A	58.11	PASS	SN=0;STA=2329233;STO=2329234;TYP=SUB;R1P=465;R1M=486;R2P=484;R2M=442;AD=1877;DP=7866;MCOV=-41;PPC=1859;AF=0.2386;RAF=0.0053;LS=185241;MQS=112613;MQM=60;BQS=69073;BQM=39;EDS=56194;EDM=75;IDS=1854612;IDM=992;CED=601;HMP=1;SB=1.0000;EFF=SYNONYMOUS_CODING(LOW|SILENT|ctC/ctT|L188|549|yfaQ|protein_coding|CODING|NP_416730.1|1|1|WARNING_TRANSCRIPT_NO_START_CODON)	GT:DP:AD:AF:RAF:SB:SC:PF	0	0	0	0	0	0.9939	1	1	0.9942	0.9931	0	0	0	0	0	0.0079	0	0	0.0054	0
NC_000913.3	1632863	ydfJ	b4600	T	C	57.98	PASS	SN=0;STA=1632862;STO=1632863;TYP=SUB;R1P=936;R1M=765;R2P=882;R2M=835;AD=3418;DP=18756;MCOV=-41;PPC=3406;AF=0.1822;RAF=0.0000;LS=325712;MQS=176463;MQM=60;BQS=127216;BQM=40;EDS=96177;EDM=75;IDS=3377573;IDM=992;CED=601;HMP=0;SB=0.9998;EFF=INTRON(MODIFIER||||455|ydfJ|protein_coding|CODING|b4600|1|1)	GT:DP:AD:AF:RAF:SB:SC:PF	0	0	0	0	0	0.9957	0.9893	0.9935	1	0.9931	0	0	0	0	0.0023	0	0.0024	0	0	0
NC_000913.3	2423274	yfcI	NP_416808.1	T	C	57.85	PASS	SN=0;STA=2423273;STO=2423274;TYP=SUB;R1P=119;R1M=109;R2P=126;R2M=123;AD=477;DP=11510;MCOV=-41;PPC=473;AF=0.0414;RAF=0.0000;LS=50616;MQS=28620;MQM=60;BQS=17600;BQM=39;EDS=14555;EDM=75;IDS=471438;IDM=992;CED=601;HMP=1;SB=0.9999;EFF=NON_SYNONYMOUS_CODING(MODERATE|MISSENSE|gAa/gGa|E89G|296|yfcI|protein_coding|CODING|NP_416808.1|1|1)	GT:DP:AD:AF:RAF:SB:SC:PF	0	0	0	0	0	0	0	0	1	0.9931	0	0	0	0	0	0.0063	0	0	0	0
NC_000913.3	2318546	rcsC	NP_416722.2	A	T	57.89	PASS	SN=0;STA=2318545;STO=2318546;TYP=SUB;R1P=78;R1M=100;R2P=105;R2M=99;AD=382;DP=8984;MCOV=-41;PPC=379;AF=0.0425;RAF=0.0000;LS=41916;MQS=22920;MQM=60;BQS=14024;BQM=39;EDS=12303;EDM=74;IDS=377754;IDM=992;CED=601;HMP=0;SB=0.9998;EFF=NON_SYNONYMOUS_CODING(MODERATE|MISSENSE|gTg/gAg|V444E|949|rcsC|protein_coding|CODING|NP_416722.2|1|1)	GT:DP:AD:AF:RAF:SB:SC:PF	0	0	0	0	0.0042	0	0	0	1	0.9931	0	0	0	0.0042	0.0088	0	0.0045	0	0	0
NC_000913.3	3542217	feoB	NP_417868.1	C	G	50.66	PASS	SN=0;STA=3542216;STO=3542217;TYP=SUB;R1P=517;R1M=474;R2P=296;R2M=470;AD=1757;DP=7621;MCOV=-41;PPC=1745;AF=0.2305;RAF=0.0000;LS=173527;MQS=105420;MQM=60;BQS=64975;BQM=39;EDS=50385;EDM=74;IDS=1736581;IDM=992;CED=601;HMP=2;SB=0.9997;EFF=NON_SYNONYMOUS_CODING(MODERATE|MISSENSE|cCg/cGg|P604R|773|feoB|protein_coding|CODING|NP_417868.1|1|1)	GT:DP:AD:AF:RAF:SB:SC:PF	0	0.0048	0	0	0	0.9937	1	1	0.9899	0.993	0	0	0	0	0	0	0	0	0	0
NC_000913.3	707570	glnS	NP_415206.1	A	G	57.36	PASS	SN=0;STA=707569;STO=707570;TYP=SUB;R1P=115;R1M=85;R2P=111;R2M=97;AD=408;DP=9836;MCOV=-41;PPC=407;AF=0.0415;RAF=0.0000;LS=44165;MQS=24480;MQM=60;BQS=14847;BQM=39;EDS=13276;EDM=75;IDS=403475;IDM=992;CED=601;HMP=0;SB=0.9996;EFF=NON_SYNONYMOUS_CODING(MODERATE|MISSENSE|aAc/aGc|N493S|554|glnS|protein_coding|CODING|NP_415206.1|1|1)	GT:DP:AD:AF:RAF:SB:SC:PF	0	0	0	0	0	0	0	0	1	0.993	0	0	0	0.004	0	0	0	0	0	0
NC_000913.3	1768370	ydiJ	NP_416202.1	G	A	57.58	PASS	SN=0;STA=1768369;STO=1768370;TYP=SUB;R1P=512;R1M=467;R2P=548;R2M=534;AD=2061;DP=8156;MCOV=-41;PPC=2054;AF=0.2527;RAF=0.0000;LS=200732;MQS=123660;MQM=60;BQS=74812;BQM=39;EDS=59671;EDM=75;IDS=2036355;IDM=992;CED=601;HMP=0;SB=0.9999;EFF=NON_SYNONYMOUS_CODING(MODERATE|MISSENSE|Cat/Tat|H106Y|1018|ydiJ|protein_coding|CODING|NP_416202.1|1|1)	GT:DP:AD:AF:RAF:SB:SC:PF	0	0	0	0	0	0.9955	1	1	1	0.9929	0	0	0	0	0.0049	0	0	0	0	0
NC_000913.3	446654	yajR	NP_414961.4	T	C	57.64	PASS	SN=0;STA=446653;STO=446654;TYP=SUB;R1P=58;R1M=71;R2P=92;R2M=87;AD=308;DP=6817;MCOV=-41;PPC=302;AF=0.0452;RAF=0.0000;LS=35065;MQS=18480;MQM=60;BQS=11397;BQM=39;EDS=9545;EDM=74;IDS=304435;IDM=992;CED=601;HMP=0;SB=0.9999;EFF=NON_SYNONYMOUS_CODING(MODERATE|MISSENSE|Aaa/Gaa|K5E|454|yajR|protein_coding|CODING|NP_414961.4|1|1)	GT:DP:AD:AF:RAF:SB:SC:PF	0	0	0	0	0	0	0	0.0062	1	0.9929	0	0	0	0	0	0	0	0	0	0
NC_000913.3	2646182	pbpC	NP_417014.1	C	T	57.79	PASS	SN=0;STA=2646181;STO=2646182;TYP=SUB;R1P=71;R1M=98;R2P=77;R2M=74;AD=320;DP=6678;MCOV=-41;PPC=319;AF=0.0479;RAF=0.0000;LS=36094;MQS=19200;MQM=60;BQS=11906;BQM=39;EDS=10829;EDM=75;IDS=316471;IDM=992;CED=601;HMP=0;SB=0.9997;EFF=NON_SYNONYMOUS_CODING(MODERATE|MISSENSE|Ggt/Agt|G382S|770|pbpC|protein_coding|CODING|NP_417014.1|1|1)	GT:DP:AD:AF:RAF:SB:SC:PF	0	0	0	0	0	0	0	0	1	0.9929	0	0	0	0	0	0	0	0	0	0
NC_000913.3	3042589	yqfA	NP_417375.1	C	G	55.26	PASS	SN=0;STA=3042588;STO=3042589;TYP=SUB;R1P=105;R1M=95;R2P=91;R2M=66;AD=357;DP=8182;MCOV=-41;PPC=352;AF=0.0436;RAF=0.0048;LS=39174;MQS=21420;MQM=60;BQS=12330;BQM=39;EDS=11763;EDM=75;IDS=350814;IDM=992;CED=601;HMP=1;SB=0.9996;EFF=NON_SYNONYMOUS_CODING(MODERATE|MISSENSE|tGc/tCc|C187S|219|yqfA|protein_coding|CODING|NP_417375.1|1|1)	GT:DP:AD:AF:RAF:SB:SC:PF	0	0	0	0	0	0	0	0	0.9909	0.9928	0	0	0	0	0	0	0	0	0	0
NC_000913.3	1334674	cysB	NP_415791.1	T	A	57.44	PASS	SN=0;STA=1334673;STO=1334674;TYP=SUB;R1P=129;R1M=89;R2P=108;R2M=90;AD=416;DP=9891;MCOV=-41;PPC=411;AF=0.0421;RAF=0.0000;LS=44766;MQS=24960;MQM=60;BQS=15377;BQM=39;EDS=12817;EDM=74;IDS=411253;IDM=992;CED=601;HMP=0;SB=0.9995;EFF=NON_SYNONYMOUS_CODING(MODERATE|MISSENSE|Ttt/Att|F274I|324|cysB|protein_coding|CODING|NP_415791.1|1|1)	GT:DP:AD:AF:RAF:SB:SC:PF	0	0	0	0	0	0	0	0	1	0.9928	0	0	0	0	0	0.0141	0	0	0	0
NC_000913.3	1321665	trpE	NP_415780.1	C	T	57.5	PASS	SN=0;STA=1321664;STO=1321665;TYP=SUB;R1P=65;R1M=60;R2P=82;R2M=83;AD=290;DP=7193;MCOV=-41;PPC=286;AF=0.0403;RAF=0.0000;LS=33246;MQS=17400;MQM=60;BQS=10767;BQM=39;EDS=9442;EDM=74;IDS=286835;IDM=992;CED=601;HMP=0;SB=0.9999;EFF=NON_SYNONYMOUS_CODING(MODERATE|MISSENSE|Ggt/Agt|G428S|520|trpE|protein_coding|CODING|NP_415780.1|1|1)	GT:DP:AD:AF:RAF:SB:SC:PF	0	0.0072	0	0	0	0	0.0056	0	0.9804	0.9928	0	0	0	0	0	0	0	0	0	0
NC_000913.3	2042736	yodB	NP_416483.4	TG	T	57.86	PASS	SN=0;STA=2042736;STO=2042737;TYP=DEL;R1P=31;R1M=37;R2P=30;R2M=39;AD=137;DP=13824;MCOV=-41;PPC=137;AF=0.0099;RAF=0.0000;LS=19317;MQS=8220;MQM=60;BQS=5125;BQM=39;EDS=5806;EDM=75;IDS=135820;IDM=992;CED=601;HMP=1;SB=0.9996;EFF=FRAME_SHIFT(HIGH||gtt/|V124|176|yodB|protein_coding|CODING|NP_416483.4|1|1);LOF=(yodB|b1974|1|1.00)	GT:DP:AD:AF:RAF:SB:SC:PF	0	0	0	0	0	0	0	0	0	0.9928	0	0	0	0	0	0	0	0	0	0
NC_000913.3	2149684	yegI	NP_416574.1	TG	T	57.81	PASS	SN=0;STA=2149684;STO=2149685;TYP=DEL;R1P=81;R1M=88;R2P=89;R2M=84;AD=342;DP=8999;MCOV=-41;PPC=335;AF=0.0380;RAF=0.0000;LS=37956;MQS=20520;MQM=60;BQS=12614;BQM=39;EDS=11628;EDM=75;IDS=338011;IDM=992;CED=601;HMP=1;SB=1.0000;EFF=FRAME_SHIFT(HIGH||aca/|T434|648|yegI|protein_coding|CODING|NP_416574.1|1|1);LOF=(yegI|b2070|1|1.00)	GT:DP:AD:AF:RAF:SB:SC:PF	0	0	0	0	0	0	0.005	0	1	0.9928	0	0	0	0	0	0	0	0	0	0
NC_000913.3	1317222	trpA	NP_415776.1	T	C	57.77	PASS	SN=0;STA=1317221;STO=1317222;TYP=SUB;R1P=80;R1M=99;R2P=85;R2M=88;AD=352;DP=8401;MCOV=-41;PPC=349;AF=0.0419;RAF=0.0000;LS=38807;MQS=21120;MQM=60;BQS=12878;BQM=39;EDS=11397;EDM=75;IDS=348022;IDM=992;CED=601;HMP=1;SB=0.9998;EFF=STOP_LOST(HIGH|MISSENSE|tgA/tgG|*398W|397|trpB|protein_coding|CODING|NP_415777.1|1|1),START_LOST(HIGH|MISSENSE|Atg/Gtg|M1V|268|trpA|protein_coding|CODING|NP_415776.1|1|1);LOF…	GT:DP:AD:AF:RAF:SB:SC:PF	0	0	0	0	0	0	0	0	0.9907	0.9927	0	0	0	0	0	0	0	0	0.0047	0
NC_000913.3	1092191	pgaA	NP_415543.1	A	T	57.95	PASS	SN=0;STA=1092190;STO=1092191;TYP=SUB;R1P=843;R1M=508;R2P=807;R2M=568;AD=2726;DP=11824;MCOV=-41;PPC=2712;AF=0.2305;RAF=0.0000;LS=260670;MQS=163522;MQM=60;BQS=101115;BQM=39;EDS=77756;EDM=75;IDS=2693485;IDM=992;CED=601;HMP=0;SB=0.9993;EFF=SYNONYMOUS_CODING(LOW|SILENT|gcT/gcA|A33|807|pgaA|protein_coding|CODING|NP_415543.1|1|1)	GT:DP:AD:AF:RAF:SB:SC:PF	0	0	0	0.0027	0.0065	0.9969	1	1	0.9935	0.9926	0	0	0.0028	0	0	0	0.0033	0.0031	0	0.0031
NC_000913.3	3397502	rng	NP_417713.2	A	G	54.46	PASS	SN=0;STA=3397501;STO=3397502;TYP=SUB;R1P=88;R1M=62;R2P=69;R2M=80;AD=299;DP=7321;MCOV=-41;PPC=299;AF=0.0408;RAF=0.0000;LS=33644;MQS=17934;MQM=60;BQS=9977;BQM=39;EDS=9571;EDM=73;IDS=293678;IDM=992;CED=601;HMP=1;SB=0.9998;EFF=SYNONYMOUS_CODING(LOW|SILENT|cgT/cgC|R98|489|rng|protein_coding|CODING|NP_417713.2|1|1)	GT:DP:AD:AF:RAF:SB:SC:PF	0	0	0	0	0	0	0	0	1	0.9925	0	0	0.0064	0	0	0.0077	0	0	0	0
NC_000913.3	1122243	pyrC	NP_415580.1	G	A	57.41	PASS	SN=0;STA=1122242;STO=1122243;TYP=SUB;R1P=77;R1M=85;R2P=109;R2M=82;AD=353;DP=9335;MCOV=-41;PPC=350;AF=0.0378;RAF=0.0000;LS=38630;MQS=21180;MQM=60;BQS=13072;BQM=39;EDS=11130;EDM=74;IDS=348720;IDM=992;CED=601;HMP=0;SB=0.9998;EFF=NON_SYNONYMOUS_CODING(MODERATE|MISSENSE|gCa/gTa|A122V|348|pyrC|protein_coding|CODING|NP_415580.1|1|1)	GT:DP:AD:AF:RAF:SB:SC:PF	0	0.0049	0	0	0	0	0	0	1	0.9925	0.0048	0	0	0	0	0	0	0	0	0
NC_000913.3	3640111	uspA	NP_417952.1	A	G	57.18	PASS	SN=0;STA=3640110;STO=3640111;TYP=SUB;R1P=93;R1M=91;R2P=70;R2M=98;AD=352;DP=8740;MCOV=-41;PPC=347;AF=0.0403;RAF=0.0000;LS=38619;MQS=21120;MQM=60;BQS=13171;BQM=39;EDS=10885;EDM=74;IDS=347322;IDM=992;CED=601;HMP=0;SB=0.9997;EFF=START_LOST(HIGH|MISSENSE|Atg/Gtg|M1V|144|uspA|protein_coding|CODING|NP_417952.1|1|1);LOF=(uspA|b3495|1|1.00)	GT:DP:AD:AF:RAF:SB:SC:PF	0	0	0	0	0	0	0	0	0.9954	0.9925	0.0098	0	0	0	0	0	0	0	0	0.0044
NC_000913.3	3687269	bcsC	YP_026226.4	A	G	57.42	PASS	SN=0;STA=3687268;STO=3687269;TYP=SUB;R1P=77;R1M=69;R2P=78;R2M=76;AD=300;DP=6697;MCOV=-41;PPC=297;AF=0.0448;RAF=0.0000;LS=33892;MQS=18000;MQM=60;BQS=10947;BQM=38;EDS=10472;EDM=75;IDS=296650;IDM=992;CED=601;HMP=1;SB=0.9999;EFF=SYNONYMOUS_CODING(LOW|SILENT|gcT/gcC|A635|1157|bcsC|protein_coding|CODING|YP_026226.4|1|1)	GT:DP:AD:AF:RAF:SB:SC:PF	0	0	0	0	0	0	0	0	1	0.9925	0	0	0.0128	0	0.0063	0	0	0	0	0
NC_000913.3	2373271	arnF	NP_416761.4	G	T	50.55	PASS	SN=0;STA=2373270;STO=2373271;TYP=SUB;R1P=107;R1M=91;R2P=104;R2M=79;AD=381;DP=8654;MCOV=-41;PPC=377;AF=0.0440;RAF=0.0000;LS=40646;MQS=22833;MQM=60;BQS=14015;BQM=39;EDS=11805;EDM=75;IDS=376185;IDM=992;CED=601;HMP=2;SB=0.9996;EFF=NON_SYNONYMOUS_CODING(MODERATE|MISSENSE|cGt/cTt|R127L|128|arnF|protein_coding|CODING|NP_416761.4|1|1)	GT:DP:AD:AF:RAF:SB:SC:PF	0	0.0043	0.0047	0	0	0	0	0.0071	0.9961	0.9919	0.0046	0	0.0045	0	0	0	0	0	0	0
NC_000913.3	2293802	ccmF	NP_416700.1	A	T	57.59	PASS	SN=0;STA=2293801;STO=2293802;TYP=SUB;R1P=321;R1M=502;R2P=444;R2M=472;AD=1739;DP=7255;MCOV=-41;PPC=1724;AF=0.2397;RAF=0.0000;LS=169777;MQS=104340;MQM=60;BQS=63243;BQM=39;EDS=51018;EDM=75;IDS=1717986;IDM=992;CED=601;HMP=0;SB=0.9996;EFF=NON_SYNONYMOUS_CODING(MODERATE|MISSENSE|cTg/cAg|L368Q|647|ccmF|protein_coding|CODING|NP_416700.1|1|1)	GT:DP:AD:AF:RAF:SB:SC:PF	0	0	0	0	0.0061	0.9943	1	1	1	0.9915	0	0	0	0	0	0	0	0	0	0
NC_000913.3	570787	0	0	TG	T	43.54	PASS	SN=0;STA=570787;STO=570788;TYP=DEL;R1P=47;R1M=56;R2P=38;R2M=70;AD=211;DP=15566;MCOV=-41;PPC=211;AF=0.0136;RAF=0.0000;LS=28651;MQS=12660;MQM=60;BQS=7827;BQM=39;EDS=8785;EDM=74;IDS=209136;IDM=992;CED=601;HMP=6;SB=0.9993;EFF=INTERGENIC(MODIFIER||||||||||1)	GT:DP:AD:AF:RAF:SB:SC:PF	0	0	0.0021	0.002	0.002	0.0042	0.0044	0	0.0021	0.9895	0.0045	0.0025	0.002	0.0071	0	0	0	0	0	0.0043
NC_000913.3	2012058	yedN	b4495	AC	A	48.65	PASS	SN=0;STA=2012058;STO=2012059;TYP=DEL;R1P=61;R1M=50;R2P=38;R2M=36;AD=185;DP=16012;MCOV=-41;PPC=185;AF=0.0116;RAF=0.0000;LS=26011;MQS=11100;MQM=60;BQS=7057;BQM=40;EDS=7140;EDM=75;IDS=183430;IDM=992;CED=601;HMP=3;SB=0.9997;EFF=FRAME_SHIFT(HIGH||ggt/|G98|373|yedN|protein_coding|CODING|b4495|1|1|WARNING_TRANSCRIPT_INCOMPLETE);LOF=(yedN|b4495|1|1.00)	GT:DP:AD:AF:RAF:SB:SC:PF	0	0	0	0	0	0	0	0	0	0.9892	0	0	0	0	0	0.0066	0	0	0	0
NC_000913.3	1704861	0	0	G	A	58.74	PASS	SN=0;STA=1704860;STO=1704861;TYP=SUB;R1P=175;R1M=275;R2P=188;R2M=276;AD=914;DP=12325;MCOV=-41;PPC=904;AF=0.0742;RAF=0.0035;LS=92105;MQS=54831;MQM=60;BQS=33747;BQM=39;EDS=27313;EDM=74;IDS=903223;IDM=992;CED=601;HMP=0;SB=0.9993;EFF=INTERGENIC(MODIFIER||||||||||1)	GT:DP:AD:AF:RAF:SB:SC:PF	0	0	0	0	0.0057	0	0.0029	0	1	0.9891	0.0028	0	0	0	0	0	0	0	0	0.9971
NC_000913.3	1018386	0	0	T	G	51.05	PASS	SN=0;STA=1018385;STO=1018386;TYP=SUB;R1P=647;R1M=582;R2P=646;R2M=558;AD=2433;DP=10585;MCOV=-41;PPC=2425;AF=0.2299;RAF=0.0000;LS=237743;MQS=145980;MQM=60;BQS=89280;BQM=39;EDS=71029;EDM=75;IDS=2403729;IDM=992;CED=601;HMP=2;SB=0.9998;EFF=INTERGENIC(MODIFIER||||||||||1)	GT:DP:AD:AF:RAF:SB:SC:PF	0	0	0	0	0	0.9813	0.9888	1	0.9892	0.989	0	0	0	0.004	0	0	0	0	0	0
NC_000913.3	1145992	0	0	C	A	51.09	PASS	SN=0;STA=1145991;STO=1145992;TYP=SUB;R1P=104;R1M=104;R2P=104;R2M=84;AD=396;DP=8624;MCOV=-41;PPC=390;AF=0.0459;RAF=0.0000;LS=44648;MQS=23743;MQM=60;BQS=14483;BQM=39;EDS=12973;EDM=75;IDS=391396;IDM=992;CED=601;HMP=2;SB=0.9998;EFF=INTERGENIC(MODIFIER||||||||||1)	GT:DP:AD:AF:RAF:SB:SC:PF	0	0	0.005	0	0	0.0052	0	0	0.9907	0.9887	0	0	0	0.0048	0.0051	0	0.004	0	0	0
NC_000913.3	1377636	ycjS	NP_415831.1	T	G	56.82	PASS	SN=0;STA=1377635;STO=1377636;TYP=SUB;R1P=106;R1M=95;R2P=98;R2M=74;AD=373;DP=8713;MCOV=-41;PPC=371;AF=0.0428;RAF=0.0000;LS=42481;MQS=22380;MQM=60;BQS=13593;BQM=39;EDS=11967;EDM=75;IDS=366106;IDM=992;CED=601;HMP=0;SB=0.9997;EFF=NON_SYNONYMOUS_CODING(MODERATE|MISSENSE|Ttt/Gtt|F269V|351|ycjS|protein_coding|CODING|NP_415831.1|1|1|WARNING_TRANSCRIPT_NO_START_CODON)	GT:DP:AD:AF:RAF:SB:SC:PF	0	0	0	0	0	0	0	0	0.99	0.9885	0	0	0	0	0	0	0	0	0	0
NC_000913.3	1423887	trkG	NP_415881.1	GA	G	43.44	PASS	SN=0;STA=1423887;STO=1423888;TYP=DEL;R1P=149;R1M=121;R2P=135;R2M=126;AD=531;DP=13192;MCOV=-41;PPC=529;AF=0.0403;RAF=0.0000;LS=56689;MQS=31860;MQM=60;BQS=19671;BQM=39;EDS=17111;EDM=75;IDS=524784;IDM=992;CED=601;HMP=6;SB=0.9997;EFF=FRAME_SHIFT(HIGH||gaa/|E36|485|trkG|protein_coding|CODING|NP_415881.1|1|1);LOF=(trkG|b1363|1|1.00)	GT:DP:AD:AF:RAF:SB:SC:PF	0	0	0	0	0	0	0	0	0.9652	0.9884	0	0	0	0	0	0	0	0	0	0
NC_000913.3	175818	clcA	NP_414697.1	T	C	58.15	PASS	SN=0;STA=175817;STO=175818;TYP=SUB;R1P=42;R1M=58;R2P=35;R2M=37;AD=172;DP=8868;MCOV=-41;PPC=172;AF=0.0194;RAF=0.0046;LS=24152;MQS=10320;MQM=60;BQS=6292;BQM=39;EDS=7406;EDM=75;IDS=170347;IDM=992;CED=601;HMP=0;SB=0.9996;EFF=SYNONYMOUS_CODING(LOW|SILENT|Ttg/Ctg|L238|473|clcA|protein_coding|CODING|NP_414697.1|1|1)	GT:DP:AD:AF:RAF:SB:SC:PF	0	0	0	0	0	0	0	0	0	0.9883	0	0	0	0	0	0.0062	0	0	0	0
NC_000913.3	58718	yabP	b4659	A	T	58.33	PASS	SN=0;STA=58717;STO=58718;TYP=SUB;R1P=120;R1M=148;R2P=89;R2M=136;AD=493;DP=12269;MCOV=-41;PPC=490;AF=0.0402;RAF=0.0000;LS=53172;MQS=29580;MQM=60;BQS=18019;BQM=40;EDS=15898;EDM=74;IDS=487539;IDM=992;CED=601;HMP=0;SB=0.9995;EFF=NON_SYNONYMOUS_CODING(MODERATE|MISSENSE|gAg/gTg|E82V|267|yabP|protein_coding|CODING|b4659|1|1|WARNING_TRANSCRIPT_INCOMPLETE)	GT:DP:AD:AF:RAF:SB:SC:PF	0	0	0.0026	0	0	0	0	0	1	0.9882	0	0	0	0	0	0	0	0	0	0
NC_000913.3	2822902	recA	NP_417179.1	C	A	57.91	PASS	SN=0;STA=2822901;STO=2822902;TYP=SUB;R1P=594;R1M=573;R2P=538;R2M=578;AD=2283;DP=9268;MCOV=-41;PPC=2279;AF=0.2463;RAF=0.0000;LS=223342;MQS=136980;MQM=60;BQS=82195;BQM=39;EDS=66956;EDM=75;IDS=2255509;IDM=992;CED=601;HMP=0;SB=1.0000;EFF=NON_SYNONYMOUS_CODING(MODERATE|MISSENSE|Gcg/Tcg|A290S|353|recA|protein_coding|CODING|NP_417179.1|1|1)	GT:DP:AD:AF:RAF:SB:SC:PF	0	0	0	0	0	1	1	0.9937	0.993	0.988	0.0047	0	0	0	0	0	0	0	0	0
NC_000913.3	2968079	ptsP	NP_417306.1	CG	C	58.45	PASS	SN=0;STA=2968079;STO=2968080;TYP=DEL;R1P=507;R1M=595;R2P=545;R2M=606;AD=2253;DP=9409;MCOV=-41;PPC=2237;AF=0.2395;RAF=0.0000;LS=221351;MQS=135180;MQM=60;BQS=82529;BQM=39;EDS=69049;EDM=75;IDS=2226125;IDM=992;CED=601;HMP=1;SB=0.9998;EFF=FRAME_SHIFT(HIGH||cgc/|R119|748|ptsP|protein_coding|CODING|NP_417306.1|1|1);LOF=(ptsP|b2829|1|1.00)	GT:DP:AD:AF:RAF:SB:SC:PF	0	0	0	0	0	0.9908	0.9862	0.9942	0.9843	0.9879	0	0	0	0	0	0	0	0	0	0
NC_000913.3	2541224	cysW	YP_026168.2	G	A	58.04	PASS	SN=0;STA=2541223;STO=2541224;TYP=SUB;R1P=71;R1M=98;R2P=85;R2M=76;AD=330;DP=7120;MCOV=-41;PPC=328;AF=0.0463;RAF=0.0000;LS=37972;MQS=19800;MQM=60;BQS=12161;BQM=39;EDS=11511;EDM=75;IDS=326380;IDM=992;CED=601;HMP=1;SB=0.9998;EFF=SYNONYMOUS_CODING(LOW|SILENT|gtC/gtT|V152|291|cysW|protein_coding|CODING|YP_026168.2|1|1)	GT:DP:AD:AF:RAF:SB:SC:PF	0	0	0	0	0	0	0	0	1	0.9876	0	0	0	0	0	0	0	0	0.0056	0.006
NC_000913.3	2750355	grpE	NP_417104.1	C	T	57.93	PASS	SN=0;STA=2750354;STO=2750355;TYP=SUB;R1P=90;R1M=105;R2P=97;R2M=94;AD=386;DP=9228;MCOV=-41;PPC=381;AF=0.0418;RAF=0.0000;LS=42855;MQS=23160;MQM=60;BQS=14192;BQM=39;EDS=12425;EDM=74;IDS=381678;IDM=992;CED=601;HMP=1;SB=0.9999;EFF=SYNONYMOUS_CODING(LOW|SILENT|gcG/gcA|A118|197|grpE|protein_coding|CODING|NP_417104.1|1|1)	GT:DP:AD:AF:RAF:SB:SC:PF	0	0.0042	0.0045	0	0	0	0.0042	0	0.9868	0.9874	0	0	0	0	0	0	0	0	0	0
NC_000913.3	3371943	nanT	NP_417691.4	C	T	58.27	PASS	SN=0;STA=3371942;STO=3371943;TYP=SUB;R1P=129;R1M=577;R2P=458;R2M=473;AD=1637;DP=6759;MCOV=-41;PPC=1618;AF=0.2422;RAF=0.0000;LS=164233;MQS=98220;MQM=60;BQS=60811;BQM=39;EDS=48125;EDM=75;IDS=1617086;IDM=992;CED=601;HMP=0;SB=0.9991;EFF=NON_SYNONYMOUS_CODING(MODERATE|MISSENSE|cGc/cAc|R211H|496|nanT|protein_coding|CODING|NP_417691.4|1|1)	GT:DP:AD:AF:RAF:SB:SC:PF	0	0	0	0	0	1	0.9929	0.9937	1	0.9873	0	0	0	0	0	0	0	0	0	0
NC_000913.3	1332747	topA	NP_415790.1	T	A	57.84	PASS	SN=0;STA=1332746;STO=1332747;TYP=SUB;R1P=104;R1M=101;R2P=89;R2M=97;AD=391;DP=9088;MCOV=-41;PPC=386;AF=0.0430;RAF=0.0000;LS=43325;MQS=23460;MQM=60;BQS=14212;BQM=39;EDS=12737;EDM=75;IDS=386287;IDM=992;CED=601;HMP=0;SB=0.9999;EFF=NON_SYNONYMOUS_CODING(MODERATE|MISSENSE|tTc/tAc|F567Y|865|topA|protein_coding|CODING|NP_415790.1|1|1)	GT:DP:AD:AF:RAF:SB:SC:PF	0.0047	0	0	0.0043	0	0.004	0	0.0075	0.9956	0.9873	0.004	0	0	0	0	0	0	0	0	0
NC_000913.3	2706041	lepA	NP_417064.1	C	T	58.12	PASS	SN=0;STA=2706040;STO=2706041;TYP=SUB;R1P=38;R1M=40;R2P=44;R2M=36;AD=158;DP=7752;MCOV=-41;PPC=158;AF=0.0204;RAF=0.0000;LS=22140;MQS=9480;MQM=60;BQS=5948;BQM=39;EDS=6224;EDM=74;IDS=156478;IDM=992;CED=601;HMP=1;SB=0.9999;EFF=NON_SYNONYMOUS_CODING(MODERATE|MISSENSE|Gat/Aat|D362N|599|lepA|protein_coding|CODING|NP_417064.1|1|1)	GT:DP:AD:AF:RAF:SB:SC:PF	0	0	0	0	0	0	0	0	0	0.9873	0	0	0	0	0	0	0	0	0	0
NC_000913.3	2378462	menD	NP_416767.1	C	T	57.7	PASS	SN=0;STA=2378461;STO=2378462;TYP=SUB;R1P=40;R1M=38;R2P=39;R2M=35;AD=152;DP=6683;MCOV=-41;PPC=152;AF=0.0227;RAF=0.0000;LS=21382;MQS=9120;MQM=60;BQS=5731;BQM=39;EDS=5418;EDM=74;IDS=150711;IDM=992;CED=601;HMP=0;SB=0.9998;EFF=STOP_GAINED(HIGH|NONSENSE|tgG/tgA|W266*|556|menD|protein_coding|CODING|NP_416767.1|1|1)	GT:DP:AD:AF:RAF:SB:SC:PF	0.0078	0	0	0	0	0	0	0.008	0	0.9868	0	0	0	0	0	0	0	0	0	0
NC_000913.3	2381218	elaA	NP_416770.1	T	A	57.75	PASS	SN=0;STA=2381217;STO=2381218;TYP=SUB;R1P=107;R1M=91;R2P=84;R2M=91;AD=373;DP=9495;MCOV=-41;PPC=367;AF=0.0393;RAF=0.0000;LS=41209;MQS=22380;MQM=60;BQS=13771;BQM=39;EDS=11595;EDM=75;IDS=368710;IDM=992;CED=601;HMP=1;SB=0.9999;EFF=NON_SYNONYMOUS_CODING(MODERATE|MISSENSE|gAt/gTt|D109V|153|elaA|protein_coding|CODING|NP_416770.1|1|1)	GT:DP:AD:AF:RAF:SB:SC:PF	0	0	0	0	0	0	0	0	1	0.9865	0	0	0	0	0	0.0071	0	0.0041	0	0
NC_000913.3	1802476	thrS	NP_416234.1	G	A	57.96	PASS	SN=0;STA=1802475;STO=1802476;TYP=SUB;R1P=121;R1M=98;R2P=114;R2M=99;AD=432;DP=10199;MCOV=-41;PPC=428;AF=0.0424;RAF=0.0000;LS=46471;MQS=25920;MQM=60;BQS=15924;BQM=39;EDS=13662;EDM=75;IDS=426795;IDM=992;CED=601;HMP=0;SB=0.9997;EFF=NON_SYNONYMOUS_CODING(MODERATE|MISSENSE|gCg/gTg|A32V|642|thrS|protein_coding|CODING|NP_416234.1|1|1)	GT:DP:AD:AF:RAF:SB:SC:PF	0	0	0.0033	0	0.0075	0	0	0	0.9965	0.9864	0	0	0	0	0	0	0	0	0	0
NC_000913.3	281675	yagA	NP_414801.1	CT	C	56.97	PASS	SN=0;STA=281675;STO=281676;TYP=DEL;R1P=60;R1M=60;R2P=57;R2M=74;AD=251;DP=5489;MCOV=-41;PPC=249;AF=0.0457;RAF=0.0000;LS=29999;MQS=15060;MQM=60;BQS=9048;BQM=39;EDS=9085;EDM=75;IDS=248242;IDM=992;CED=601;HMP=1;SB=0.9997;EFF=FRAME_SHIFT(HIGH||cag/|Q103|384|yagA|protein_coding|CODING|NP_414801.1|1|1);LOF=(yagA|b0267|1|1.00)	GT:DP:AD:AF:RAF:SB:SC:PF	0	0	0	0	0	0	0	0	1	0.9863	0	0	0	0	0	0	0	0	0	0
NC_000913.3	4085344	fdoG	NP_418330.1	G	C	57.91	PASS	SN=0;STA=4085343;STO=4085344;TYP=SUB;R1P=448;R1M=568;R2P=548;R2M=572;AD=2136;DP=8905;MCOV=-41;PPC=2119;AF=0.2399;RAF=0.0000;LS=208576;MQS=128160;MQM=60;BQS=78879;BQM=39;EDS=63782;EDM=74;IDS=2111001;IDM=992;CED=601;HMP=0;SB=0.9997;EFF=NON_SYNONYMOUS_CODING(MODERATE|MISSENSE|tCc/tGc|S160C|1016|fdoG|protein_coding|CODING|NP_418330.1|1|1)	GT:DP:AD:AF:RAF:SB:SC:PF	0	0	0	0	0	0.9864	0.9899	1	0.9911	0.9861	0	0	0	0	0	0	0	0	0	0
NC_000913.3	3411020	dusB	NP_417726.1	GC	G	43.27	PASS	SN=0;STA=3411020;STO=3411021;TYP=DEL;R1P=82;R1M=89;R2P=94;R2M=85;AD=350;DP=8645;MCOV=-41;PPC=349;AF=0.0405;RAF=0.0000;LS=38816;MQS=21000;MQM=60;BQS=12796;BQM=39;EDS=12622;EDM=75;IDS=346259;IDM=992;CED=601;HMP=6;SB=1.0000;EFF=FRAME_SHIFT(HIGH||ccc/|P248|321|dusB|protein_coding|CODING|NP_417726.1|1|1);LOF=(dusB|b3260|1|1.00)	GT:DP:AD:AF:RAF:SB:SC:PF	0	0	0	0	0	0	0	0	0.9624	0.9859	0	0	0.0044	0	0	0	0.005	0	0.0048	0
NC_000913.3	573309	ybcO	NP_415081.1	TGC	T	57.74	PASS	SN=0;STA=573309;STO=573311;TYP=DEL;R1P=426;R1M=440;R2P=404;R2M=410;AD=1680;DP=8459;MCOV=-41;PPC=1669;AF=0.1986;RAF=0.0000;LS=165810;MQS=100800;MQM=60;BQS=61345;BQM=39;EDS=53722;EDM=75;IDS=1659726;IDM=992;CED=601;HMP=0;SB=1.0000;EFF=FRAME_SHIFT(HIGH||tgc/|C76|96|ybcO|protein_coding|CODING|NP_415081.1|1|1);LOF=(ybcO|b0549|1|1.00)	GT:DP:AD:AF:RAF:SB:SC:PF	0	0	0	0	0	0.9057	0.9533	0.9478	0.9543	0.9855	0	0	0	0	0	0	0	0	0	0
NC_000913.3	652016	0	0	GA	G	46.69	PASS	SN=0;STA=652016;STO=652017;TYP=DEL;R1P=129;R1M=147;R2P=179;R2M=121;AD=576;DP=13571;MCOV=-41;PPC=575;AF=0.0424;RAF=0.0000;LS=62611;MQS=34560;MQM=60;BQS=20725;BQM=39;EDS=18645;EDM=75;IDS=569657;IDM=992;CED=601;HMP=4;SB=0.9997;EFF=INTERGENIC(MODIFIER||||||||||1)	GT:DP:AD:AF:RAF:SB:SC:PF	0	0	0	0	0	0	0	0	0.9763	0.9855	0	0	0	0	0	0	0	0.0024	0	0
NC_000913.3	248162	0	0	A	G	54.47	PASS	SN=0;STA=248161;STO=248162;TYP=SUB;R1P=41;R1M=49;R2P=32;R2M=45;AD=167;DP=8337;MCOV=-41;PPC=165;AF=0.0200;RAF=0.0000;LS=18440;MQS=9502;MQM=60;BQS=6079;BQM=38;EDS=6053;EDM=75;IDS=163168;IDM=992;CED=601;HMP=1;SB=0.9996;EFF=INTERGENIC(MODIFIER||||||||||1)	GT:DP:AD:AF:RAF:SB:SC:PF	0	0	0	0	0	0	0	0	1	0.9851	0	0	0	0	0	0.0069	0.0047	0	0.0046	0
NC_000913.3	1878862	yoaK	YP_002791242.1	G	A	56.56	PASS	SN=0;STA=1878861;STO=1878862;TYP=SUB;R1P=131;R1M=133;R2P=121;R2M=132;AD=517;DP=11601;MCOV=-41;PPC=516;AF=0.0446;RAF=0.0000;LS=56520;MQS=31020;MQM=60;BQS=18127;BQM=39;EDS=16991;EDM=75;IDS=510323;IDM=992;CED=601;HMP=0;SB=0.9999;EFF=SYNONYMOUS_CODING(LOW|SILENT|ccG/ccA|P30|32|yoaK|protein_coding|CODING|YP_002791242.1|1|1)	GT:DP:AD:AF:RAF:SB:SC:PF	0	0	0	0	0	0	0	0	1	0.9845	0	0	0	0	0	0	0.0035	0	0.0029	0.0031
NC_000913.3	368029	mhpR	NP_414880.2	G	T	55.92	PASS	SN=0;STA=368028;STO=368029;TYP=SUB;R1P=104;R1M=97;R2P=101;R2M=80;AD=382;DP=7665;MCOV=-41;PPC=380;AF=0.0498;RAF=0.0000;LS=43475;MQS=22920;MQM=60;BQS=13537;BQM=39;EDS=12596;EDM=75;IDS=374182;IDM=992;CED=601;HMP=0;SB=0.9997;EFF=NON_SYNONYMOUS_CODING(MODERATE|MISSENSE|tCc/tAc|S131Y|277|mhpR|protein_coding|CODING|NP_414880.2|1|1)	GT:DP:AD:AF:RAF:SB:SC:PF	0.0057	0	0	0.0054	0.006	0	0	0	0.9951	0.9831	0	0	0	0	0	0	0	0	0	0
NC_000913.3	2315250	rcsD	NP_416720.1	GA	G	43.48	PASS	SN=0;STA=2315250;STO=2315251;TYP=DEL;R1P=113;R1M=101;R2P=123;R2M=108;AD=445;DP=10422;MCOV=-41;PPC=443;AF=0.0427;RAF=0.0000;LS=49029;MQS=26700;MQM=60;BQS=16378;BQM=39;EDS=14407;EDM=75;IDS=439965;IDM=992;CED=601;HMP=6;SB=0.9998;EFF=FRAME_SHIFT(HIGH||gga/|G588|890|rcsD|protein_coding|CODING|NP_416720.1|1|1);LOF=(rcsD|b2216|1|1.00)	GT:DP:AD:AF:RAF:SB:SC:PF	0	0	0	0.0036	0	0	0.0036	0	0.9851	0.9829	0	0	0.0037	0	0.004	0	0	0	0.0039	0
NC_000913.3	1627149	dcp	NP_416056.1	C	CA	58.09	PASS	SN=0;STA=1627149;STO=1627149;TYP=INS;R1P=107;R1M=81;R2P=118;R2M=92;AD=398;DP=12258;MCOV=-41;PPC=393;AF=0.0325;RAF=0.0000;LS=44342;MQS=23880;MQM=60;BQS=14628;BQM=38;EDS=13309;EDM=74;IDS=393695;IDM=992;CED=601;HMP=0;SB=0.9995;EFF=FRAME_SHIFT(HIGH||ttt/tttT|F77F?|681|dcp|protein_coding|CODING|NP_416056.1|1|1);LOF=(dcp|b1538|1|1.00)	GT:DP:AD:AF:RAF:SB:SC:PF	0	0	0	0	0	0	0	0	0.9141	0.982	0	0	0	0	0	0	0	0	0	0
NC_000913.3	884501	mdfA	NP_415363.1	C	A	57.57	PASS	SN=0;STA=884500;STO=884501;TYP=SUB;R1P=90;R1M=73;R2P=105;R2M=71;AD=339;DP=7627;MCOV=-41;PPC=337;AF=0.0444;RAF=0.0000;LS=38597;MQS=20340;MQM=60;BQS=12017;BQM=39;EDS=11290;EDM=74;IDS=334983;IDM=992;CED=601;HMP=0;SB=0.9995;EFF=NON_SYNONYMOUS_CODING(MODERATE|MISSENSE|Cgt/Agt|R277S|410|mdfA|protein_coding|CODING|NP_415363.1|1|1)	GT:DP:AD:AF:RAF:SB:SC:PF	0	0.0114	0	0	0	0.0057	0	0	1	0.9811	0	0	0	0	0.0062	0	0.0048	0	0	0
NC_000913.3	1168161	0	0	G	T	57.25	PASS	SN=0;STA=1168160;STO=1168161;TYP=SUB;R1P=99;R1M=92;R2P=85;R2M=72;AD=348;DP=8416;MCOV=-41;PPC=347;AF=0.0413;RAF=0.0000;LS=38540;MQS=20880;MQM=60;BQS=12658;BQM=39;EDS=10926;EDM=75;IDS=344178;IDM=992;CED=601;HMP=0;SB=0.9998;EFF=INTERGENIC(MODIFIER||||||||||1)	GT:DP:AD:AF:RAF:SB:SC:PF	0	0	0.0059	0	0	0	0.005	0	1	0.9787	0	0	0	0	0	0	0.0048	0	0	0.0053
NC_000913.3	952417	pflB	NP_415423.1	GT	G	43.24	PASS	SN=0;STA=952417;STO=952418;TYP=DEL;R1P=84;R1M=99;R2P=83;R2M=93;AD=359;DP=9310;MCOV=-41;PPC=350;AF=0.0386;RAF=0.0000;LS=39058;MQS=21540;MQM=60;BQS=13118;BQM=39;EDS=11806;EDM=75;IDS=354733;IDM=992;CED=601;HMP=6;SB=0.9997;EFF=FRAME_SHIFT(HIGH||aaa/|K379|760|pflB|protein_coding|CODING|NP_415423.1|1|1);LOF=(pflB|b0903|1|1.00)	GT:DP:AD:AF:RAF:SB:SC:PF	0	0	0	0	0	0	0	0	0.9661	0.9773	0	0	0	0	0	0	0	0	0	0
NC_000913.3	1149802	fabD	NP_415610.1	C	T	54.22	PASS	SN=0;STA=1149801;STO=1149802;TYP=SUB;R1P=81;R1M=91;R2P=93;R2M=96;AD=361;DP=8221;MCOV=-41;PPC=355;AF=0.0439;RAF=0.0000;LS=41238;MQS=21622;MQM=60;BQS=12089;BQM=39;EDS=11713;EDM=75;IDS=356329;IDM=992;CED=601;HMP=1;SB=0.9999;EFF=SYNONYMOUS_CODING(LOW|SILENT|agC/agT|S25|309|fabD|protein_coding|CODING|NP_415610.1|1|1)	GT:DP:AD:AF:RAF:SB:SC:PF	0	0	0	0	0	0	0	0	0.9946	0.9769	0.0112	0	0	0.0051	0	0	0	0.0045	0	0
NC_000913.3	1911591	yebQ	NP_416342.4	C	A	57.32	PASS	SN=0;STA=1911590;STO=1911591;TYP=SUB;R1P=39;R1M=40;R2P=36;R2M=49;AD=164;DP=8577;MCOV=-41;PPC=164;AF=0.0191;RAF=0.0000;LS=22799;MQS=9840;MQM=60;BQS=5824;BQM=39;EDS=6800;EDM=75;IDS=162336;IDM=992;CED=601;HMP=1;SB=0.9997;EFF=NON_SYNONYMOUS_CODING(MODERATE|MISSENSE|gCa/gAa|A439E|457|yebQ|protein_coding|CODING|NP_416342.4|1|1)	GT:DP:AD:AF:RAF:SB:SC:PF	0	0.0057	0	0	0	0	0	0	0	0.9753	0	0.0043	0	0	0	0	0.0056	0	0	0
NC_000913.3	4495464	ahr	NP_418690.4	A	T	56.1	PASS	SN=0;STA=4495463;STO=4495464;TYP=SUB;R1P=446;R1M=524;R2P=439;R2M=507;AD=1916;DP=7887;MCOV=-41;PPC=1898;AF=0.2429;RAF=0.0000;LS=185911;MQS=114960;MQM=60;BQS=68953;BQM=39;EDS=55097;EDM=75;IDS=1889840;IDM=992;CED=601;HMP=0;SB=0.9997;EFF=NON_SYNONYMOUS_CODING(MODERATE|MISSENSE|tTt/tAt|F249Y|339|ahr|protein_coding|CODING|NP_418690.4|1|1)	GT:DP:AD:AF:RAF:SB:SC:PF	0	0	0	0	0.0058	0.9942	0.994	0.9549	1	0.9739	0	0	0	0	0	0	0	0	0	0
NC_000913.3	3133759	yghS	NP_417459.1	C	CA	56.8	PASS	SN=0;STA=3133759;STO=3133759;TYP=INS;R1P=109;R1M=78;R2P=125;R2M=86;AD=398;DP=10138;MCOV=-41;PPC=393;AF=0.0393;RAF=0.0000;LS=43503;MQS=23880;MQM=60;BQS=14785;BQM=38;EDS=13072;EDM=75;IDS=389642;IDM=985;CED=601;HMP=0;SB=0.9994;EFF=FRAME_SHIFT(HIGH||att/attT|I66I?|237|yghS|protein_coding|CODING|NP_417459.1|1|1|WARNING_TRANSCRIPT_NO_START_CODON);LOF=(yghS|b2985|1|1.00)	GT:DP:AD:AF:RAF:SB:SC:PF	0	0	0	0	0	0	0	0	0.9061	0.9733	0	0	0	0	0	0.0063	0	0	0	0
NC_000913.3	341517	yahJ	NP_414858.1	G	T	55	PASS	SN=0;STA=341516;STO=341517;TYP=SUB;R1P=76;R1M=77;R2P=62;R2M=89;AD=304;DP=7291;MCOV=-41;PPC=304;AF=0.0417;RAF=0.0000;LS=34897;MQS=18227;MQM=60;BQS=10420;BQM=38;EDS=10183;EDM=75;IDS=299660;IDM=992;CED=601;HMP=0;SB=0.9997;EFF=SYNONYMOUS_CODING(LOW|SILENT|ggG/ggT|G131|460|yahJ|protein_coding|CODING|NP_414858.1|1|1)	GT:DP:AD:AF:RAF:SB:SC:PF	0	0	0	0	0	0.0049	0	0	0.9935	0.9733	0	0	0	0	0	0	0	0	0	0.0178
NC_000913.3	2510810	yfeO	NP_416890.1	C	T	55.76	PASS	SN=0;STA=2510809;STO=2510810;TYP=SUB;R1P=479;R1M=336;R2P=447;R2M=463;AD=1725;DP=7447;MCOV=-41;PPC=1717;AF=0.2316;RAF=0.0000;LS=171232;MQS=103500;MQM=60;BQS=61809;BQM=39;EDS=50364;EDM=75;IDS=1703680;IDM=992;CED=601;HMP=0;SB=0.9997;EFF=NON_SYNONYMOUS_CODING(MODERATE|MISSENSE|gCa/gTa|A394V|418|yfeO|protein_coding|CODING|NP_416890.1|1|1)	GT:DP:AD:AF:RAF:SB:SC:PF	0	0	0	0	0	0.9943	0.9932	0.9863	1	0.9732	0	0	0.0065	0	0	0	0	0.0055	0	0
NC_000913.3	1730881	lhr	NP_416170.1	C	T	55.91	PASS	SN=0;STA=1730880;STO=1730881;TYP=SUB;R1P=23;R1M=46;R2P=26;R2M=36;AD=131;DP=6144;MCOV=-41;PPC=130;AF=0.0213;RAF=0.0000;LS=18313;MQS=7855;MQM=60;BQS=4577;BQM=39;EDS=5328;EDM=74;IDS=128978;IDM=992;CED=601;HMP=0;SB=0.9992;EFF=STOP_GAINED(HIGH|NONSENSE|Caa/Taa|Q599*|1538|lhr|protein_coding|CODING|NP_416170.1|1|1)	GT:DP:AD:AF:RAF:SB:SC:PF	0.0079	0	0	0	0	0	0	0	0	0.9697	0	0	0	0	0.0084	0	0	0	0	0
NC_000913.3	3931176	0	0	AG	A	43.47	PASS	SN=0;STA=3931176;STO=3931177;TYP=DEL;R1P=602;R1M=506;R2P=544;R2M=550;AD=2202;DP=9672;MCOV=-41;PPC=2197;AF=0.2277;RAF=0.0000;LS=216804;MQS=132099;MQM=60;BQS=80313;BQM=39;EDS=66314;EDM=75;IDS=2175679;IDM=992;CED=601;HMP=6;SB=0.9998;EFF=INTERGENIC(MODIFIER||||||||||1)	GT:DP:AD:AF:RAF:SB:SC:PF	0	0.0069	0	0	0.0038	0.9483	0.9643	0.9702	0.9519	0.9661	0	0.0041	0	0.0119	0	0	0.004	0	0.0037	0.0084
NC_000913.3	1611929	0	0	TA	T	57.91	PASS	SN=0;STA=1611929;STO=1611930;TYP=DEL;R1P=558;R1M=591;R2P=542;R2M=309;AD=2000;DP=10565;MCOV=-41;PPC=1991;AF=0.1893;RAF=0.0000;LS=197952;MQS=120000;MQM=60;BQS=72861;BQM=39;EDS=58615;EDM=75;IDS=1976443;IDM=992;CED=601;HMP=1;SB=0.9996;EFF=INTERGENIC(MODIFIER||||||||||1)	GT:DP:AD:AF:RAF:SB:SC:PF	0	0	0	0	0	0.9692	0.9738	0.9697	0.9894	0.9651	0	0	0	0.0046	0	0	0	0	0	0
NC_000913.3	2327214	atoB	NP_416728.1	G	T	55.86	PASS	SN=0;STA=2327213;STO=2327214;TYP=SUB;R1P=461;R1M=527;R2P=436;R2M=484;AD=1908;DP=8129;MCOV=-41;PPC=1900;AF=0.2347;RAF=0.0000;LS=189168;MQS=114480;MQM=60;BQS=67292;BQM=39;EDS=55854;EDM=75;IDS=1865679;IDM=992;CED=601;HMP=0;SB=0.9998;EFF=NON_SYNONYMOUS_CODING(MODERATE|MISSENSE|cGc/cTc|R369L|394|atoB|protein_coding|CODING|NP_416728.1|1|1)	GT:DP:AD:AF:RAF:SB:SC:PF	0	0	0	0	0	0.9904	0.9885	0.9816	0.9895	0.9627	0.01	0	0	0	0	0	0.0118	0	0	0
NC_000913.3	2094900	hisH	NP_416527.1	C	T	55.63	PASS	SN=0;STA=2094899;STO=2094900;TYP=SUB;R1P=82;R1M=75;R2P=92;R2M=71;AD=320;DP=7579;MCOV=-41;PPC=317;AF=0.0422;RAF=0.0000;LS=36638;MQS=19176;MQM=60;BQS=10345;BQM=39;EDS=11118;EDM=74;IDS=315510;IDM=992;CED=601;HMP=0;SB=0.9997;EFF=SYNONYMOUS_CODING(LOW|SILENT|taC/taT|Y122|196|hisH|protein_coding|CODING|NP_416527.1|1|1)	GT:DP:AD:AF:RAF:SB:SC:PF	0	0	0	0	0	0	0	0	0.994	0.9623	0	0	0	0	0	0	0	0	0	0
NC_000913.3	2831180	norR	NP_417189.2	C	T	55.6	PASS	SN=0;STA=2831179;STO=2831180;TYP=SUB;R1P=460;R1M=431;R2P=452;R2M=465;AD=1808;DP=7398;MCOV=-41;PPC=1799;AF=0.2444;RAF=0.0000;LS=178076;MQS=108434;MQM=60;BQS=63454;BQM=39;EDS=52337;EDM=75;IDS=1784705;IDM=992;CED=601;HMP=0;SB=1.0000;EFF=SYNONYMOUS_CODING(LOW|SILENT|ggG/ggA|G370|504|norR|protein_coding|CODING|NP_417189.2|1|1)	GT:DP:AD:AF:RAF:SB:SC:PF	0	0	0	0.0058	0	0.994	0.9829	0.965	1	0.9608	0	0	0	0	0	0.0067	0	0	0	0
NC_000913.3	3275826	garD	NP_417597.1	C	A	47.83	PASS	SN=0;STA=3275825;STO=3275826;TYP=SUB;R1P=27;R1M=38;R2P=24;R2M=39;AD=128;DP=8499;MCOV=-41;PPC=128;AF=0.0151;RAF=0.0000;LS=17698;MQS=7680;MQM=60;BQS=3813;BQM=39;EDS=5144;EDM=74;IDS=126032;IDM=992;CED=601;HMP=0;SB=0.9993;EFF=NON_SYNONYMOUS_CODING(MODERATE|MISSENSE|gCg/gAg|A182E|523|garD|protein_coding|CODING|NP_417597.1|1|1)	GT:DP:AD:AF:RAF:SB:SC:PF	0	0	0	0.004	0	0	0	0	0.0088	0.9453	0.0049	0	0	0	0	0	0.0044	0	0.0045	0
NC_000913.3	3131422	yghQ	YP_026192.1	C	T	54.95	PASS	SN=0;STA=3131421;STO=3131422;TYP=SUB;R1P=109;R1M=76;R2P=101;R2M=59;AD=345;DP=7573;MCOV=-41;PPC=339;AF=0.0456;RAF=0.0000;LS=37097;MQS=20700;MQM=60;BQS=11874;BQM=39;EDS=11039;EDM=75;IDS=339811;IDM=992;CED=601;HMP=0;SB=0.9993;EFF=SYNONYMOUS_CODING(LOW|SILENT|gcG/gcA|A329|355|yghQ|protein_coding|CODING|YP_026192.1|1|1)	GT:DP:AD:AF:RAF:SB:SC:PF	0	0	0	0	0	0	0.0057	0	1	0.9365	0	0	0.0067	0	0	0	0	0	0.0056	0
NC_000913.3	2636203	der	NP_417006.2	G	A	52.95	PASS	SN=0;STA=2636202;STO=2636203;TYP=SUB;R1P=27;R1M=43;R2P=25;R2M=43;AD=138;DP=8824;MCOV=-41;PPC=137;AF=0.0156;RAF=0.0000;LS=19308;MQS=8251;MQM=60;BQS=4521;BQM=39;EDS=5968;EDM=75;IDS=134594;IDM=992;CED=601;HMP=0;SB=0.9992;EFF=NON_SYNONYMOUS_CODING(MODERATE|MISSENSE|aCg/aTg|T385M|490|der|protein_coding|CODING|NP_417006.2|1|1)	GT:DP:AD:AF:RAF:SB:SC:PF	0	0.0047	0	0	0	0	0	0.0072	0	0.9306	0	0	0	0.0049	0	0	0	0	0	0
NC_000913.3	3756494	aldB	NP_418045.4	A	AG	58.03	PASS	SN=0;STA=3756494;STO=3756494;TYP=INS;R1P=522;R1M=452;R2P=539;R2M=403;AD=1916;DP=8691;MCOV=-41;PPC=1909;AF=0.2205;RAF=0.0000;LS=188311;MQS=114960;MQM=60;BQS=69796;BQM=39;EDS=55959;EDM=75;IDS=1893214;IDM=992;CED=601;HMP=0;SB=0.9996;EFF=FRAME_SHIFT(HIGH||cct/ccCt|P6P?|512|aldB|protein_coding|CODING|NP_418045.4|1|1)	GT:DP:AD:AF:RAF:SB:SC:PF	0	0	0	0	0	0.9614	0.9479	0.9375	0.9541	0.9268	0	0	0	0	0	0	0	0.0047	0	0
NC_000913.3	3269963	0	0	C	T	54.97	PASS	SN=0;STA=3269962;STO=3269963;TYP=SUB;R1P=92;R1M=141;R2P=74;R2M=135;AD=442;DP=10632;MCOV=-41;PPC=436;AF=0.0416;RAF=0.0000;LS=47700;MQS=24906;MQM=60;BQS=15097;BQM=39;EDS=14280;EDM=75;IDS=436609;IDM=992;CED=601;HMP=0;SB=0.9992;EFF=INTERGENIC(MODIFIER||||||||||1)	GT:DP:AD:AF:RAF:SB:SC:PF	0	0	0	0	0	0.0036	0	0	0.9965	0.9152	0	0	0	0	0	0	0.0038	0	0	0
NC_000913.3	4161131	fabR	NP_418398.2	T	A	50.08	PASS	SN=0;STA=4161130;STO=4161131;TYP=SUB;R1P=625;R1M=618;R2P=575;R2M=662;AD=2480;DP=9332;MCOV=-41;PPC=2462;AF=0.2658;RAF=0.0000;LS=227193;MQS=148749;MQM=60;BQS=89574;BQM=38;EDS=68285;EDM=71;IDS=2446141;IDM=989;CED=601;HMP=2;SB=0.9999;EFF=NON_SYNONYMOUS_CODING(MODERATE|MISSENSE|gTa/gAa|V3E|215|fabR|protein_coding|CODING|NP_418398.2|1|1)	GT:DP:AD:AF:RAF:SB:SC:PF	1	0.992	1	1	1	0	0	0.0827	0	0.1208	0	0	0	0.0041	0.0046	0.0897	0.0074	0	0	0.0046
NC_000913.3	3525012	mrcA	NP_417855.4	C	CG	26.04	FAIL	SN=0;STA=3525012;STO=3525012;TYP=INS;R1P=10;R1M=0;R2P=22;R2M=0;AD=32;DP=7403;MCOV=-41;PPC=32;AF=0.0043;RAF=0.0000;LS=4512;MQS=1920;MQM=60;BQS=1202;BQM=38;EDS=1449;EDM=75;IDS=31269;IDM=992;CED=601;HMP=0;SB=0.0000;EFF=FRAME_SHIFT(HIGH||ggg/Gggg|G715G?|850|mrcA|protein_coding|CODING|NP_417855.4|1|1|WARNING_TRANSCRIPT_NO_START_CODON);LOF=(mrcA|b3396|1|1.00)	GT:DP:AD:AF:RAF:SB:SC:PF	0	0	0	0	0	0	0	0.0506	0	0.1192	0	0	0	0	0	0.042	0	0	0	0
NC_000913.3	1346349	gmr	NP_415801.1	T	C	45.68	PASS	SN=0;STA=1346348;STO=1346349;TYP=SUB;R1P=123;R1M=146;R2P=116;R2M=183;AD=568;DP=10546;MCOV=-41;PPC=563;AF=0.0539;RAF=0.0000;LS=54316;MQS=34080;MQM=60;BQS=19424;BQM=38;EDS=15106;EDM=59;IDS=558035;IDM=992;CED=601;HMP=4;SB=0.9995;EFF=NON_SYNONYMOUS_CODING(MODERATE|MISSENSE|Aat/Gat|N132D|661|gmr|protein_coding|CODING|NP_415801.1|1|1)	GT:DP:AD:AF:RAF:SB:SC:PF	0	0	0	0	0	0	0	0.1183	0	0.1127	0	0	0.98	0.9925	0	0.0736	0	0	0	0
NC_000913.3	2624538	ppk	NP_416996.1	A	G	54.76	PASS	SN=0;STA=2624537;STO=2624538;TYP=SUB;R1P=72;R1M=55;R2P=82;R2M=55;AD=264;DP=8526;MCOV=-41;PPC=263;AF=0.0310;RAF=0.0000;LS=25792;MQS=15802;MQM=60;BQS=8502;BQM=38;EDS=7384;EDM=74;IDS=257606;IDM=989;CED=601;HMP=1;SB=0.9994;EFF=NON_SYNONYMOUS_CODING(MODERATE|MISSENSE|Aca/Gca|T499A|688|ppk|protein_coding|CODING|NP_416996.1|1|1)	GT:DP:AD:AF:RAF:SB:SC:PF	0	0	0	0	0	0	0.0097	0.0952	0	0.1111	0.0053	0.0047	0	0	0	0.0699	0	0	0	0
NC_000913.3	3292631	rsmI	NP_417615.1	A	T	20.05	PASS	SN=0;STA=3292630;STO=3292631;TYP=SUB;R1P=19;R1M=0;R2P=30;R2M=0;AD=49;DP=8064;MCOV=-41;PPC=49;AF=0.0061;RAF=0.0000;LS=5709;MQS=2906;MQM=60;BQS=914;BQM=36;EDS=1908;EDM=74;IDS=45316;IDM=989;CED=601;HMP=5;SB=0.0000;EFF=NON_SYNONYMOUS_CODING(MODERATE|MISSENSE|caT/caA|H235Q|286|rsmI|protein_coding|CODING|NP_417615.1|1|1)	GT:DP:AD:AF:RAF:SB:SC:PF	0.0054	0.0114	0.0113	0.0051	0.0047	0.0057	0	0.1149	0.0099	0.1048	0	0.005	0.0051	0.0056	0	0.0521	0.005	0.0053	0	0.0057
NC_000913.3	2388309	yfbN	NP_416776.1	G	A	47.68	PASS	SN=0;STA=2388308;STO=2388309;TYP=SUB;R1P=105;R1M=95;R2P=96;R2M=114;AD=410;DP=13608;MCOV=-41;PPC=405;AF=0.0301;RAF=0.0031;LS=39413;MQS=24581;MQM=60;BQS=14445;BQM=38;EDS=11275;EDM=69;IDS=403872;IDM=992;CED=601;HMP=3;SB=0.9999;EFF=NON_SYNONYMOUS_CODING(MODERATE|MISSENSE|Cat/Tat|H40Y|238|yfbN|protein_coding|CODING|NP_416776.1|1|1)	GT:DP:AD:AF:RAF:SB:SC:PF	0	0.0023	0	0	0	0	0.0025	0.1154	0	0.094	0.0024	0	0	0.0027	0	0.0949	0	0	0.9972	0
NC_000913.3	3080726	tktA	YP_026188.1	C	T	42.92	PASS	SN=0;STA=3080725;STO=3080726;TYP=SUB;R1P=56;R1M=58;R2P=60;R2M=60;AD=234;DP=8311;MCOV=-41;PPC=234;AF=0.0282;RAF=0.0000;LS=22014;MQS=14040;MQM=60;BQS=8147;BQM=38;EDS=6865;EDM=67;IDS=230152;IDM=989;CED=601;HMP=6;SB=1.0000;EFF=NON_SYNONYMOUS_CODING(MODERATE|MISSENSE|Gaa/Aaa|E304K|663|tktA|protein_coding|CODING|YP_026188.1|1|1)	GT:DP:AD:AF:RAF:SB:SC:PF	0	0.0054	0	0	0	0	0	0.0292	0	0.0704	0.0045	0	0	0.0055	0	0.0067	0	0	0.0053	0
NC_000913.3	1708709	rsxC	NP_416146.1	T	C	23.66	PASS	SN=0;STA=1708708;STO=1708709;TYP=SUB;R1P=23;R1M=6;R2P=80;R2M=12;AD=121;DP=8069;MCOV=-41;PPC=121;AF=0.0150;RAF=0.0000;LS=12619;MQS=6061;MQM=60;BQS=1884;BQM=38;EDS=2850;EDM=73;IDS=118731;IDM=992;CED=601;HMP=0;SB=0.1850;EFF=SYNONYMOUS_CODING(LOW|SILENT|cgT/cgC|R597|740|rsxC|protein_coding|CODING|NP_416146.1|1|1)	GT:DP:AD:AF:RAF:SB:SC:PF	0.0104	0	0.0103	0.0096	0	0.05	0	0.1489	0.0149	0.0683	0	0	0.0087	0.0103	0.0114	0.1046	0.0093	0	0.0109	0.0239
NC_000913.3	3408071	panF	NP_417724.4	T	G	28.26	PASS	SN=0;STA=3408070;STO=3408071;TYP=SUB;R1P=14;R1M=0;R2P=16;R2M=1;AD=31;DP=7154;MCOV=-41;PPC=31;AF=0.0043;RAF=0.0050;LS=3766;MQS=1860;MQM=60;BQS=559;BQM=38;EDS=1092;EDM=74;IDS=29742;IDM=992;CED=601;HMP=3;SB=0.0004;EFF=SYNONYMOUS_CODING(LOW|SILENT|ggT/ggG|G155|483|panF|protein_coding|CODING|NP_417724.4|1|1)	GT:DP:AD:AF:RAF:SB:SC:PF	0	0	0	0	0	0.0058	0	0.0879	0	0.0667	0	0	0.0071	0.0055	0	0.0581	0	0	0.0061	0
NC_000913.3	974759	mukF	NP_415442.1	T	G	23.82	PASS	SN=0;STA=974758;STO=974759;TYP=SUB;R1P=32;R1M=1;R2P=69;R2M=1;AD=103;DP=8173;MCOV=-41;PPC=102;AF=0.0126;RAF=0.0050;LS=10194;MQS=6165;MQM=60;BQS=1615;BQM=38;EDS=3134;EDM=75;IDS=98480;IDM=989;CED=601;HMP=4;SB=0.0000;EFF=SYNONYMOUS_CODING(LOW|SILENT|ggT/ggG|G147|440|mukF|protein_coding|CODING|NP_415442.1|1|1)	GT:DP:AD:AF:RAF:SB:SC:PF	0.0113	0.0106	0.0255	0.0097	0.0262	0.0234	0.0149	0.0571	0.0057	0.0577	0.005	0.0104	0	0.0097	0.0155	0.0561	0.0201	0.0231	0.0048	0.0106
NC_000913.3	2950205	argA	NP_417295.1	C	T	45.9	PASS	SN=0;STA=2950204;STO=2950205;TYP=SUB;R1P=161;R1M=130;R2P=156;R2M=142;AD=589;DP=8499;MCOV=-41;PPC=585;AF=0.0693;RAF=0.0000;LS=54270;MQS=35340;MQM=60;BQS=21290;BQM=38;EDS=17106;EDM=70;IDS=580918;IDM=989;CED=601;HMP=4;SB=0.9997;EFF=SYNONYMOUS_CODING(LOW|SILENT|Ctg/Ttg|L322|443|argA|protein_coding|CODING|NP_417295.1|1|1|WARNING_TRANSCRIPT_NO_START_CODON)	GT:DP:AD:AF:RAF:SB:SC:PF	0	0	0	0	0.0049	0	0	0.0219	0	0.0461	1	1	0	0	0.9945	0.0345	0	0	0	0
NC_000913.3	2845454	hycE	NP_417201.1	C	T	43.83	PASS	SN=0;STA=2845453;STO=2845454;TYP=SUB;R1P=53;R1M=56;R2P=47;R2M=70;AD=226;DP=7708;MCOV=-41;PPC=219;AF=0.0293;RAF=0.0054;LS=21569;MQS=13546;MQM=60;BQS=7171;BQM=38;EDS=6987;EDM=73;IDS=221689;IDM=992;CED=601;HMP=5;SB=0.9996;EFF=NON_SYNONYMOUS_CODING(MODERATE|MISSENSE|Gac/Aac|D340N|569|hycE|protein_coding|CODING|NP_417201.1|1|1)	GT:DP:AD:AF:RAF:SB:SC:PF	0	0	0	0.0051	0.9947	0.0047	0.0068	0.0503	0.0054	0.0443	0	0	0	0	0	0.0743	0	0.0055	0.0053	0
NC_000913.3	2548093	murP	NP_416924.1	A	G	49.59	PASS	SN=0;STA=2548092;STO=2548093;TYP=SUB;R1P=190;R1M=148;R2P=161;R2M=117;AD=616;DP=8314;MCOV=-41;PPC=606;AF=0.0741;RAF=0.0000;LS=56549;MQS=36941;MQM=60;BQS=21746;BQM=38;EDS=17435;EDM=61;IDS=607205;IDM=989;CED=601;HMP=2;SB=0.9995;EFF=NON_SYNONYMOUS_CODING(MODERATE|MISSENSE|gAc/gGc|D474G|474|murP|protein_coding|CODING|NP_416924.1|1|1)	GT:DP:AD:AF:RAF:SB:SC:PF	1	0.0053	0.9945	1	0.0045	0	0	0.0248	0	0.0405	0	0	0	0.0045	0	0.0263	0	0	0	0
NC_000913.3	2257503	psuG	NP_416670.1	T	G	50.71	PASS	SN=0;STA=2257502;STO=2257503;TYP=SUB;R1P=52;R1M=40;R2P=46;R2M=48;AD=186;DP=8415;MCOV=-41;PPC=186;AF=0.0221;RAF=0.0048;LS=25860;MQS=11160;MQM=60;BQS=6578;BQM=39;EDS=7276;EDM=75;IDS=182740;IDM=992;CED=601;HMP=2;SB=0.9998;EFF=NON_SYNONYMOUS_CODING(MODERATE|MISSENSE|Aac/Cac|N289H|312|psuG|protein_coding|CODING|NP_416670.1|1|1)	GT:DP:AD:AF:RAF:SB:SC:PF	0	0	0	0	0.0053	0	0	0.0268	0	0.0355	0	0	0.006	0	0	1	0	0.0051	0	0
NC_000913.3	1466099	ydbA	b4492	T	C	21.7	PASS	SN=0;STA=1466098;STO=1466099;TYP=SUB;R1P=17;R1M=5;R2P=26;R2M=21;AD=69;DP=9922;MCOV=-41;PPC=69;AF=0.0070;RAF=0.0000;LS=7105;MQS=3758;MQM=60;BQS=1417;BQM=39;EDS=2332;EDM=73;IDS=66912;IDM=992;CED=601;HMP=0;SB=0.9992;EFF=SYNONYMOUS_CODING(LOW|SILENT|ggT/ggC|G236|2020|ydbA|protein_coding|CODING|b4492|1|1)	GT:DP:AD:AF:RAF:SB:SC:PF	0	0.0049	0	0.0085	0.0086	0.0082	0.004	0.0208	0	0.0343	0	0	0.0113	0.0086	0.0085	0.055	0.0087	0	0.0039	0.0042
NC_000913.3	2474321	yfdQ	NP_416861.1	G	T	20.25	PASS	SN=0;STA=2474320;STO=2474321;TYP=SUB;R1P=6;R1M=11;R2P=1;R2M=11;AD=29;DP=9496;MCOV=-41;PPC=29;AF=0.0031;RAF=0.0000;LS=3181;MQS=1728;MQM=60;BQS=600;BQM=38;EDS=1141;EDM=71;IDS=27225;IDM=989;CED=601;HMP=1;SB=0.7229;EFF=NON_SYNONYMOUS_CODING(MODERATE|MISSENSE|gGt/gTt|G97V|274|yfdQ|protein_coding|CODING|NP_416861.1|1|1)	GT:DP:AD:AF:RAF:SB:SC:PF	0	0.0037	0.0036	0	0	0	0	0.0515	0	0.033	0	0	0.0069	0	0	0.069	0.0039	0.0085	0.0037	0
NC_000913.3	3303875	yhbW	NP_417629.1	T	G	43.89	PASS	SN=0;STA=3303874;STO=3303875;TYP=SUB;R1P=46;R1M=43;R2P=60;R2M=39;AD=188;DP=7205;MCOV=-41;PPC=185;AF=0.0261;RAF=0.0000;LS=17710;MQS=11280;MQM=60;BQS=6294;BQM=38;EDS=5408;EDM=57;IDS=185464;IDM=992;CED=601;HMP=5;SB=0.9995;EFF=NON_SYNONYMOUS_CODING(MODERATE|MISSENSE|gTg/gGg|V143G|335|yhbW|protein_coding|CODING|NP_417629.1|1|1)	GT:DP:AD:AF:RAF:SB:SC:PF	0	0.9882	0	0	0	0	0	0.0136	0	0.0265	0	0	0	0	0	0.0452	0	0	0	0.0063
NC_000913.3	2833572	norV	NP_417190.1	A	G	55.26	PASS	SN=0;STA=2833571;STO=2833572;TYP=SUB;R1P=44;R1M=44;R2P=47;R2M=52;AD=187;DP=7056;MCOV=-41;PPC=187;AF=0.0265;RAF=0.0000;LS=17694;MQS=11218;MQM=60;BQS=6411;BQM=38;EDS=5095;EDM=72;IDS=184066;IDM=989;CED=601;HMP=1;SB=0.9999;EFF=NON_SYNONYMOUS_CODING(MODERATE|MISSENSE|gAa/gGa|E366G|479|norV|protein_coding|CODING|NP_417190.1|1|1)	GT:DP:AD:AF:RAF:SB:SC:PF	0	0.0059	0	0	0	0	0.006	0.0458	0	0.0211	0	0	0	0	0.0058	0.0368	0	0	0.0061	0
NC_000913.3	886487	ybjJ	NP_415366.1	G	A	49.29	PASS	SN=0;STA=886486;STO=886487;TYP=SUB;R1P=43;R1M=53;R2P=47;R2M=40;AD=183;DP=7147;MCOV=-41;PPC=179;AF=0.0256;RAF=0.0000;LS=17233;MQS=10950;MQM=60;BQS=6105;BQM=38;EDS=5289;EDM=71;IDS=179703;IDM=989;CED=601;HMP=2;SB=0.9999;EFF=NON_SYNONYMOUS_CODING(MODERATE|MISSENSE|Cgg/Tgg|R285W|402|ybjJ|protein_coding|CODING|NP_415366.1|1|1)	GT:DP:AD:AF:RAF:SB:SC:PF	0	0	0	0	0	0	0.0065	0.0361	0	0.021	0	0.0052	0	0	0	0.0388	0	0	1	0.0051
NC_000913.3	2947491	0	0	C	T	52.23	PASS	SN=0;STA=2947490;STO=2947491;TYP=SUB;R1P=86;R1M=90;R2P=72;R2M=63;AD=311;DP=6852;MCOV=-41;PPC=304;AF=0.0454;RAF=0.0000;LS=28440;MQS=16937;MQM=60;BQS=9959;BQM=38;EDS=8315;EDM=50;IDS=305833;IDM=989;CED=601;HMP=0;SB=0.9999;EFF=INTERGENIC(MODIFIER||||||||||1)	GT:DP:AD:AF:RAF:SB:SC:PF	0.9742	0	0	0.9808	0	0	0	0	0	0.019	0.006	0	0	0	0	0.0088	0	0	0	0
NC_000913.3	888392	ybjL	NP_415368.1	C	A	50.5	PASS	SN=0;STA=888391;STO=888392;TYP=SUB;R1P=536;R1M=470;R2P=570;R2M=445;AD=2021;DP=8130;MCOV=-41;PPC=2011;AF=0.2486;RAF=0.0000;LS=190926;MQS=121260;MQM=60;BQS=73775;BQM=39;EDS=58174;EDM=75;IDS=1994817;IDM=992;CED=601;HMP=2;SB=0.9997;EFF=NON_SYNONYMOUS_CODING(MODERATE|MISSENSE|ttG/ttT|L476F|561|ybjL|protein_coding|CODING|NP_415368.1|1|1|WARNING_TRANSCRIPT_NO_START_CODON)	GT:DP:AD:AF:RAF:SB:SC:PF	0	0	0	0.0055	0.0053	0	0	0.0397	0	0.0183	0	0	0	0	0	1	1	0.9947	1	0.9953
NC_000913.3	3695970	bcsQ	b3534	A	T	47.2	PASS	SN=0;STA=3695969;STO=3695970;TYP=SUB;R1P=60;R1M=31;R2P=65;R2M=38;AD=194;DP=8228;MCOV=-41;PPC=191;AF=0.0236;RAF=0.0000;LS=17989;MQS=11623;MQM=60;BQS=6931;BQM=38;EDS=5223;EDM=67;IDS=190945;IDM=989;CED=601;HMP=3;SB=0.9991;EFF=STOP_LOST(HIGH|MISSENSE|Tag/Aag|*6K|250|bcsQ|protein_coding|CODING|b3534|1|1)	GT:DP:AD:AF:RAF:SB:SC:PF	1	0	0	0	0	0	0	0.0153	0	0.0175	0	0	0	0	0.0054	0.0168	0	0	0	0
NC_000913.3	987512	0	0	A	G	40.08	PASS	SN=0;STA=987511;STO=987512;TYP=SUB;R1P=67;R1M=137;R2P=74;R2M=148;AD=426;DP=13295;MCOV=-41;PPC=421;AF=0.0320;RAF=0.0000;LS=39009;MQS=25557;MQM=60;BQS=15021;BQM=38;EDS=12460;EDM=72;IDS=419374;IDM=989;CED=601;HMP=1;SB=0.9204;EFF=INTERGENIC(MODIFIER||||||||||1)	GT:DP:AD:AF:RAF:SB:SC:PF	0	0	0.9975	0	0.0024	0	0	0.0202	0	0.0171	0.0026	0.0061	0	0	0	0.0204	0	0	0	0.0026
NC_000913.3	354297	prpE	NP_414869.1	C	G	47.43	PASS	SN=0;STA=354296;STO=354297;TYP=SUB;R1P=114;R1M=110;R2P=136;R2M=108;AD=468;DP=7150;MCOV=-41;PPC=458;AF=0.0655;RAF=0.0000;LS=43017;MQS=28075;MQM=60;BQS=16587;BQM=38;EDS=13358;EDM=72;IDS=461261;IDM=989;CED=601;HMP=3;SB=0.9997;EFF=NON_SYNONYMOUS_CODING(MODERATE|MISSENSE|gCg/gGg|A531G|628|prpE|protein_coding|CODING|NP_414869.1|1|1)	GT:DP:AD:AF:RAF:SB:SC:PF	1	0	1	1	0	0	0.0066	0.036	0.0073	0.0153	0	0	0.0071	0	0	0.0258	0	0	0	0
NC_000913.3	869233	gsiA	NP_415350.2	C	A	49.72	PASS	SN=0;STA=869232;STO=869233;TYP=SUB;R1P=255;R1M=246;R2P=235;R2M=229;AD=965;DP=6938;MCOV=-41;PPC=959;AF=0.1391;RAF=0.0000;LS=87789;MQS=57900;MQM=60;BQS=34870;BQM=38;EDS=27815;EDM=50;IDS=952467;IDM=992;CED=601;HMP=2;SB=0.9999;EFF=NON_SYNONYMOUS_CODING(MODERATE|MISSENSE|Ccg/Acg|P572T|623|gsiA|protein_coding|CODING|NP_415350.2|1|1)	GT:DP:AD:AF:RAF:SB:SC:PF	1	0.9938	1	0.9933	0.993	0.0068	0	0	0	0.0146	0.0058	0	0	0	0	0	0	0	0.0131	0
NC_000913.3	3811094	mutM	NP_418092.1	C	A	55.49	PASS	SN=0;STA=3811093;STO=3811094;TYP=SUB;R1P=59;R1M=43;R2P=62;R2M=43;AD=207;DP=8622;MCOV=-41;PPC=202;AF=0.0240;RAF=0.0000;LS=18920;MQS=12416;MQM=60;BQS=7499;BQM=38;EDS=5665;EDM=49;IDS=203851;IDM=989;CED=601;HMP=1;SB=0.9994;EFF=NON_SYNONYMOUS_CODING(MODERATE|MISSENSE|gGt/gTt|G20V|269|mutM|protein_coding|CODING|NP_418092.1|1|1)	GT:DP:AD:AF:RAF:SB:SC:PF	0	0	0	0.0052	0	0	0.9949	0	0	0.0144	0	0	0.0044	0	0.0049	0.006	0	0	0	0
NC_000913.3	3397432	rng	NP_417713.2	C	G	49.3	PASS	SN=0;STA=3397431;STO=3397432;TYP=SUB;R1P=57;R1M=57;R2P=54;R2M=51;AD=219;DP=7386;MCOV=-41;PPC=218;AF=0.0297;RAF=0.0000;LS=20063;MQS=13140;MQM=60;BQS=7979;BQM=38;EDS=5473;EDM=50;IDS=216139;IDM=989;CED=601;HMP=2;SB=0.9999;EFF=NON_SYNONYMOUS_CODING(MODERATE|MISSENSE|Gat/Cat|D122H|489|rng|protein_coding|CODING|NP_417713.2|1|1)	GT:DP:AD:AF:RAF:SB:SC:PF	0	0	0	0	0	0	0.0062	0.0061	0	0.014	0	0	0	0	0	0	0	0	0	0
NC_000913.3	4392490	0	0	G	T	56.57	PASS	SN=0;STA=4392489;STO=4392490;TYP=SUB;R1P=626;R1M=478;R2P=683;R2M=448;AD=2235;DP=8967;MCOV=-41;PPC=2228;AF=0.2492;RAF=0.0044;LS=203338;MQS=129560;MQM=60;BQS=81900;BQM=38;EDS=62295;EDM=50;IDS=2206626;IDM=992;CED=601;HMP=1;SB=0.9994;EFF=INTERGENIC(MODIFIER||||||||||1)	GT:DP:AD:AF:RAF:SB:SC:PF	0	0	0	0.0045	0	0	0	0.0292	0	0.0139	0.9955	1	0.9958	1	0.9871	0.0065	0	0.0106	0	0
NC_000913.3	424396	acpH	NP_414938.1	T	G	47.33	PASS	SN=0;STA=424395;STO=424396;TYP=SUB;R1P=52;R1M=37;R2P=66;R2M=52;AD=207;DP=7867;MCOV=-41;PPC=203;AF=0.0263;RAF=0.0000;LS=18819;MQS=12409;MQM=60;BQS=7149;BQM=38;EDS=5942;EDM=50;IDS=203886;IDM=992;CED=601;HMP=3;SB=0.9995;EFF=NON_SYNONYMOUS_CODING(MODERATE|MISSENSE|Acc/Ccc|T175P|193|acpH|protein_coding|CODING|NP_414938.1|1|1)	GT:DP:AD:AF:RAF:SB:SC:PF	0.0057	0	1	0	0.0056	0	0	0	0	0.0139	0	0	0.0048	0	0	0	0.0061	0	0	0.0055
NC_000913.3	4102448	kdgT	NP_418345.2	C	G	50.84	PASS	SN=0;STA=4102447;STO=4102448;TYP=SUB;R1P=254;R1M=228;R2P=266;R2M=202;AD=950;DP=7974;MCOV=-41;PPC=945;AF=0.1191;RAF=0.0000;LS=94455;MQS=57000;MQM=60;BQS=34547;BQM=39;EDS=29338;EDM=75;IDS=938108;IDM=992;CED=601;HMP=2;SB=0.9997;EFF=SYNONYMOUS_CODING(LOW|SILENT|ggC/ggG|G253|327|kdgT|protein_coding|CODING|NP_418345.2|1|1)	GT:DP:AD:AF:RAF:SB:SC:PF	0	0	0	0	0	0	0.0049	0	0	0.0138	0	0	0	0.0055	0	1	0.9946	1	0.9953	1
NC_000913.3	1639225	rzoQ	YP_002791241.1	C	T	50.39	PASS	SN=0;STA=1639224;STO=1639225;TYP=SUB;R1P=36;R1M=35;R2P=38;R2M=36;AD=145;DP=12990;MCOV=-41;PPC=145;AF=0.0112;RAF=0.0000;LS=20183;MQS=8700;MQM=60;BQS=5255;BQM=39;EDS=5804;EDM=74;IDS=141989;IDM=992;CED=601;HMP=2;SB=0.9999;EFF=NON_SYNONYMOUS_CODING(MODERATE|MISSENSE|cGa/cAa|R37Q|84|rzoQ|protein_coding|CODING|YP_002791241.1|1|1),SYNONYMOUS_CODING(LOW|SILENT|gcG/gcA|A101|165|rzpQ|protein_coding|CODING|…	GT:DP:AD:AF:RAF:SB:SC:PF	0	0	0	0	0	0	0	0.029	0	0.0136	0	0	0	0	0.0074	1	0	0	0	0
NC_000913.3	4592303	tsr	NP_418775.1	C	A	54.59	PASS	SN=0;STA=4592302;STO=4592303;TYP=SUB;R1P=36;R1M=52;R2P=55;R2M=58;AD=201;DP=7777;MCOV=-41;PPC=200;AF=0.0258;RAF=0.0000;LS=18498;MQS=12060;MQM=60;BQS=6921;BQM=38;EDS=5398;EDM=70;IDS=198095;IDM=989;CED=601;HMP=0;SB=0.9997;EFF=NON_SYNONYMOUS_CODING(MODERATE|MISSENSE|gCc/gAc|A216D|551|tsr|protein_coding|CODING|NP_418775.1|1|1)	GT:DP:AD:AF:RAF:SB:SC:PF	0	0	0	0	0.0064	0	0	0	0	0.0136	0	0	0.0058	0	0	0.02	0.9948	0	0	0.0048
NC_000913.3	2816419	gshA	NP_417173.1	C	T	55.72	PASS	SN=0;STA=2816418;STO=2816419;TYP=SUB;R1P=107;R1M=125;R2P=117;R2M=136;AD=485;DP=9520;MCOV=-41;PPC=481;AF=0.0509;RAF=0.0037;LS=44236;MQS=29100;MQM=60;BQS=17244;BQM=38;EDS=13605;EDM=61;IDS=478435;IDM=989;CED=601;HMP=1;SB=0.9997;EFF=SYNONYMOUS_CODING(LOW|SILENT|caG/caA|Q7|518|gshA|protein_coding|CODING|NP_417173.1|1|1)	GT:DP:AD:AF:RAF:SB:SC:PF	0	0	0	0.0043	0	0	0	0.0157	0	0.0135	0	0	0.9955	1	0	0	0	0	0	0
NC_000913.3	4063013	yihN	NP_418310.1	T	C	56.04	PASS	SN=0;STA=4063012;STO=4063013;TYP=SUB;R1P=364;R1M=370;R2P=359;R2M=344;AD=1437;DP=10570;MCOV=-41;PPC=1422;AF=0.1360;RAF=0.0000;LS=130773;MQS=86213;MQM=60;BQS=51984;BQM=38;EDS=38570;EDM=62;IDS=1418358;IDM=989;CED=601;HMP=0;SB=1.0000;EFF=NON_SYNONYMOUS_CODING(MODERATE|MISSENSE|gTg/gCg|V256A|421|yihN|protein_coding|CODING|NP_418310.1|1|1)	GT:DP:AD:AF:RAF:SB:SC:PF	0	0	0.0031	0	0	0.0035	0	0	0	0.0135	0.991	0.9932	1	1	0.9963	0	0	0.0037	0	0
NC_000913.3	1062055	torD	NP_415518.1	A	G	54.48	PASS	SN=0;STA=1062054;STO=1062055;TYP=SUB;R1P=41;R1M=49;R2P=42;R2M=39;AD=171;DP=7525;MCOV=-41;PPC=169;AF=0.0227;RAF=0.0000;LS=15552;MQS=10260;MQM=60;BQS=5980;BQM=38;EDS=4659;EDM=49;IDS=168538;IDM=989;CED=601;HMP=1;SB=0.9999;EFF=NON_SYNONYMOUS_CODING(MODERATE|MISSENSE|gAc/gGc|D86G|199|torD|protein_coding|CODING|NP_415518.1|1|1)	GT:DP:AD:AF:RAF:SB:SC:PF	0	0	1	0	0	0	0	0	0	0.0132	0	0	0.0176	0	0	0	0	0	0	0
NC_000913.3	698867	asnB	NP_415200.1	A	G	46.24	PASS	SN=0;STA=698866;STO=698867;TYP=SUB;R1P=161;R1M=126;R2P=167;R2M=137;AD=591;DP=9096;MCOV=-41;PPC=585;AF=0.0650;RAF=0.0000;LS=61308;MQS=35460;MQM=60;BQS=21317;BQM=39;EDS=18605;EDM=75;IDS=583514;IDM=992;CED=601;HMP=4;SB=0.9996;EFF=NON_SYNONYMOUS_CODING(MODERATE|MISSENSE|cTc/cCc|L104P|554|asnB|protein_coding|CODING|NP_415200.1|1|1)	GT:DP:AD:AF:RAF:SB:SC:PF	0	0.0046	0	0.0046	0	0.986	0.9911	0.9933	0.0041	0.0128	0.0042	0	0	0	0.0044	0	0	0	0	0.0044
NC_000913.3	867571	gsiA	NP_415350.2	C	T	47.5	PASS	SN=0;STA=867570;STO=867571;TYP=SUB;R1P=40;R1M=60;R2P=57;R2M=47;AD=204;DP=8330;MCOV=-41;PPC=197;AF=0.0245;RAF=0.0000;LS=18692;MQS=12240;MQM=60;BQS=7454;BQM=38;EDS=5711;EDM=65;IDS=201438;IDM=992;CED=601;HMP=3;SB=0.9998;EFF=SYNONYMOUS_CODING(LOW|SILENT|Ctg/Ttg|L18|623|gsiA|protein_coding|CODING|NP_415350.2|1|1)	GT:DP:AD:AF:RAF:SB:SC:PF	0	0	0	0	0	0	0	0	0	0.0127	0	0	0	0	0	0.0069	0	1	0	0
NC_000913.3	1697632	hdhA	NP_416136.1	C	T	56.47	PASS	SN=0;STA=1697631;STO=1697632;TYP=SUB;R1P=83;R1M=75;R2P=69;R2M=63;AD=290;DP=11327;MCOV=-41;PPC=290;AF=0.0256;RAF=0.0000;LS=26426;MQS=17400;MQM=60;BQS=10493;BQM=38;EDS=8348;EDM=50;IDS=285030;IDM=989;CED=601;HMP=0;SB=0.9998;EFF=NON_SYNONYMOUS_CODING(MODERATE|MISSENSE|Ggc/Agc|G137S|255|hdhA|protein_coding|CODING|NP_416136.1|1|1|WARNING_TRANSCRIPT_NO_START_CODON)	GT:DP:AD:AF:RAF:SB:SC:PF	0.0031	0	0	0	0	0	0.0035	0	0	0.0126	0	0	0	0	0.0034	0	0	0.0035	0	0
NC_000913.3	2397261	nuoH	NP_416785.1	A	G	55.27	PASS	SN=0;STA=2397260;STO=2397261;TYP=SUB;R1P=114;R1M=81;R2P=108;R2M=70;AD=373;DP=7910;MCOV=-41;PPC=368;AF=0.0472;RAF=0.0000;LS=33908;MQS=22380;MQM=60;BQS=13245;BQM=38;EDS=10337;EDM=53;IDS=368137;IDM=989;CED=601;HMP=0;SB=0.9994;EFF=NON_SYNONYMOUS_CODING(MODERATE|MISSENSE|gTt/gCt|V61A|325|nuoH|protein_coding|CODING|NP_416785.1|1|1)	GT:DP:AD:AF:RAF:SB:SC:PF	0.9945	0	0	1	0	0	0	0	0	0.0126	0	0	0	0	0.0055	0	0	0	0	0.0045
NC_000913.3	2989377	yqeJ	NP_417325.4	C	T	44.48	PASS	SN=0;STA=2989376;STO=2989377;TYP=SUB;R1P=142;R1M=102;R2P=158;R2M=98;AD=500;DP=18587;MCOV=-41;PPC=497;AF=0.0269;RAF=0.0053;LS=45552;MQS=30000;MQM=60;BQS=18133;BQM=38;EDS=14258;EDM=62;IDS=493177;IDM=992;CED=601;HMP=5;SB=0.9993;EFF=NON_SYNONYMOUS_CODING(MODERATE|MISSENSE|tCt/tTt|S25F|160|yqeJ|protein_coding|CODING|NP_417325.4|1|1|WARNING_TRANSCRIPT_NO_START_CODON)	GT:DP:AD:AF:RAF:SB:SC:PF	0.0017	0.0017	0.0016	0	0	0.0019	0	0	0	0.0124	0	0	0.0017	0.0036	0.0031	0	1	0.0018	0.002	0
NC_000913.3	663147	dacA	NP_415165.1	T	A	57.14	PASS	SN=0;STA=663146;STO=663147;TYP=SUB;R1P=475;R1M=506;R2P=502;R2M=508;AD=1991;DP=9437;MCOV=-41;PPC=1977;AF=0.2110;RAF=0.0000;LS=187831;MQS=119412;MQM=60;BQS=72385;BQM=38;EDS=56015;EDM=75;IDS=1966856;IDM=992;CED=601;HMP=1;SB=0.9999;EFF=NON_SYNONYMOUS_CODING(MODERATE|MISSENSE|Act/Tct|T273S|403|dacA|protein_coding|CODING|NP_415165.1|1|1)	GT:DP:AD:AF:RAF:SB:SC:PF	0	0	0	0	0	0	0	0	0	0.0124	0	0	0	0	0	1	1	0.9912	1	1
NC_000913.3	3184260	ribB	NP_417513.1	G	A	56.1	PASS	SN=0;STA=3184259;STO=3184260;TYP=SUB;R1P=71;R1M=75;R2P=76;R2M=53;AD=275;DP=9569;MCOV=-41;PPC=269;AF=0.0287;RAF=0.0000;LS=25024;MQS=16500;MQM=60;BQS=10032;BQM=38;EDS=7592;EDM=50;IDS=271133;IDM=989;CED=601;HMP=0;SB=0.9997;EFF=SYNONYMOUS_CODING(LOW|SILENT|tgC/tgT|C69|217|ribB|protein_coding|CODING|NP_417513.1|1|1)	GT:DP:AD:AF:RAF:SB:SC:PF	0.9963	0	0	0	0	0.0038	0	0	0	0.0123	0	0	0	0	0	0	0	0.0046	0	0
NC_000913.3	2969692	mutH	NP_417308.1	C	A	57.46	PASS	SN=0;STA=2969691;STO=2969692;TYP=SUB;R1P=33;R1M=48;R2P=41;R2M=34;AD=156;DP=11810;MCOV=-41;PPC=155;AF=0.0132;RAF=0.0000;LS=21576;MQS=9360;MQM=60;BQS=5659;BQM=39;EDS=6162;EDM=74;IDS=154427;IDM=992;CED=601;HMP=0;SB=0.9998;EFF=NON_SYNONYMOUS_CODING(MODERATE|MISSENSE|Ccc/Acc|P11T|229|mutH|protein_coding|CODING|NP_417308.1|1|1)	GT:DP:AD:AF:RAF:SB:SC:PF	0	0.0033	0.003	0	0	0	0	1	0.0032	0.0122	0	0	0	0.0032	0	0	0	0	0	0.0034
NC_000913.3	3916923	atpD	NP_418188.1	A	G	54.89	PASS	SN=0;STA=3916922;STO=3916923;TYP=SUB;R1P=31;R1M=45;R2P=44;R2M=48;AD=168;DP=7125;MCOV=-41;PPC=167;AF=0.0236;RAF=0.0000;LS=15359;MQS=10080;MQM=60;BQS=5875;BQM=38;EDS=4596;EDM=60;IDS=165590;IDM=989;CED=601;HMP=0;SB=0.9996;EFF=SYNONYMOUS_CODING(LOW|SILENT|ggT/ggC|G151|460|atpD|protein_coding|CODING|NP_418188.1|1|1)	GT:DP:AD:AF:RAF:SB:SC:PF	0	0	0	0	0	0.9877	0	0.0077	0.0053	0.0121	0	0	0	0	0	0	0	0	0	0
NC_000913.3	2562144	yffO	NP_416941.1	G	A	47.55	PASS	SN=0;STA=2562143;STO=2562144;TYP=SUB;R1P=56;R1M=99;R2P=75;R2M=88;AD=318;DP=11387;MCOV=-41;PPC=315;AF=0.0279;RAF=0.0034;LS=28930;MQS=19080;MQM=60;BQS=11285;BQM=38;EDS=9071;EDM=71;IDS=313195;IDM=989;CED=601;HMP=3;SB=0.9994;EFF=NON_SYNONYMOUS_CODING(MODERATE|MISSENSE|Gac/Aac|D12N|138|yffO|protein_coding|CODING|NP_416941.1|1|1)	GT:DP:AD:AF:RAF:SB:SC:PF	0	0	0.0036	0	0.0033	0	0.003	0	0.9968	0.012	0	0	0.0032	0	0	0	0	0	0	0
NC_000913.3	2417879	yfcC	NP_416801.2	G	A	55.53	PASS	SN=0;STA=2417878;STO=2417879;TYP=SUB;R1P=60;R1M=55;R2P=57;R2M=52;AD=224;DP=8026;MCOV=-41;PPC=219;AF=0.0279;RAF=0.0000;LS=20470;MQS=13424;MQM=60;BQS=8016;BQM=38;EDS=6275;EDM=58;IDS=220804;IDM=989;CED=601;HMP=1;SB=0.9998;EFF=NON_SYNONYMOUS_CODING(MODERATE|MISSENSE|Gac/Aac|D267N|506|yfcC|protein_coding|CODING|NP_416801.2|1|1)	GT:DP:AD:AF:RAF:SB:SC:PF	0	0.005	0	0	0	0	0	0	0	0.012	0	0	0	0	0	0	0	1	0	0
NC_000913.3	2732284	clpB	NP_417083.1	G	T	56.52	PASS	SN=0;STA=2732283;STO=2732284;TYP=SUB;R1P=523;R1M=584;R2P=492;R2M=596;AD=2195;DP=8520;MCOV=-41;PPC=2162;AF=0.2576;RAF=0.0000;LS=199134;MQS=131700;MQM=60;BQS=81010;BQM=38;EDS=60965;EDM=50;IDS=2167076;IDM=989;CED=601;HMP=0;SB=0.9997;EFF=SYNONYMOUS_CODING(LOW|SILENT|gtC/gtA|V630|857|clpB|protein_coding|CODING|NP_417083.1|1|1)	GT:DP:AD:AF:RAF:SB:SC:PF	0.9952	1	1	0.9953	1	0	0.0095	0	0	0.012	0	0	0	0	0	0	0	0	0	0
NC_000913.3	2411611	yfbT	NP_416796.2	A	G	57.46	PASS	SN=0;STA=2411610;STO=2411611;TYP=SUB;R1P=36;R1M=33;R2P=35;R2M=47;AD=151;DP=7719;MCOV=-41;PPC=150;AF=0.0196;RAF=0.0000;LS=20533;MQS=9060;MQM=60;BQS=5251;BQM=39;EDS=5834;EDM=75;IDS=149081;IDM=992;CED=601;HMP=0;SB=0.9998;EFF=NON_SYNONYMOUS_CODING(MODERATE|MISSENSE|gTg/gCg|V160A|216|yfbT|protein_coding|CODING|NP_416796.2|1|1|WARNING_TRANSCRIPT_NO_START_CODON)	GT:DP:AD:AF:RAF:SB:SC:PF	0	0	0	0.0053	0	0.0059	0.0047	1	0	0.0118	0	0	0	0.0054	0.0102	0	0	0	0.0051	0
NC_000913.3	4030006	fadB	NP_418288.1	G	T	57.64	PASS	SN=0;STA=4030005;STO=4030006;TYP=SUB;R1P=43;R1M=49;R2P=31;R2M=46;AD=169;DP=8027;MCOV=-41;PPC=167;AF=0.0211;RAF=0.0000;LS=23342;MQS=10140;MQM=60;BQS=6025;BQM=39;EDS=6954;EDM=75;IDS=167264;IDM=992;CED=601;HMP=1;SB=0.9996;EFF=SYNONYMOUS_CODING(LOW|SILENT|ggC/ggA|G322|729|fadB|protein_coding|CODING|NP_418288.1|1|1)	GT:DP:AD:AF:RAF:SB:SC:PF	0	0	0	0.01	0	0.0052	0	0.9876	0	0.0116	0	0	0	0	0.0055	0	0	0	0	0
NC_000913.3	1823711	cho	NP_416255.1	G	T	55.56	PASS	SN=0;STA=1823710;STO=1823711;TYP=SUB;R1P=115;R1M=121;R2P=93;R2M=121;AD=450;DP=8759;MCOV=-41;PPC=444;AF=0.0514;RAF=0.0000;LS=40951;MQS=27000;MQM=60;BQS=16296;BQM=38;EDS=11997;EDM=69;IDS=444082;IDM=989;CED=601;HMP=1;SB=0.9997;EFF=NON_SYNONYMOUS_CODING(MODERATE|MISSENSE|cGt/cTt|R66L|295|cho|protein_coding|CODING|NP_416255.1|1|1|WARNING_TRANSCRIPT_NO_START_CODON)	GT:DP:AD:AF:RAF:SB:SC:PF	0.9955	0	0.0045	1	0	0	0.0083	0.0057	0.0082	0.0112	0	0	0.005	0	0	0	0.0042	0	0	0
NC_000913.3	3503165	frlC	YP_026213.1	A	G	48.52	PASS	SN=0;STA=3503164;STO=3503165;TYP=SUB;R1P=217;R1M=235;R2P=224;R2M=244;AD=920;DP=7877;MCOV=-41;PPC=912;AF=0.1168;RAF=0.0000;LS=90816;MQS=55200;MQM=60;BQS=33650;BQM=39;EDS=28004;EDM=74;IDS=908801;IDM=992;CED=601;HMP=3;SB=0.9998;EFF=NON_SYNONYMOUS_CODING(MODERATE|MISSENSE|Aga/Gga|R276G|276|frlC|protein_coding|CODING|YP_026213.1|1|1)	GT:DP:AD:AF:RAF:SB:SC:PF	0	0	0	0	0	0	0.0118	0	0	0.011	0	0	0	0	0	1	1	0.9888	1	0.9946
NC_000913.3	1896350	nudL	NP_416327.1	C	A	45.45	PASS	SN=0;STA=1896349;STO=1896350;TYP=SUB;R1P=49;R1M=47;R2P=33;R2M=47;AD=176;DP=7653;MCOV=-41;PPC=175;AF=0.0230;RAF=0.0000;LS=16106;MQS=10518;MQM=60;BQS=6303;BQM=38;EDS=4727;EDM=50;IDS=173603;IDM=992;CED=601;HMP=4;SB=0.9997;EFF=NON_SYNONYMOUS_CODING(MODERATE|MISSENSE|Caa/Aaa|Q61K|192|nudL|protein_coding|CODING|NP_416327.1|1|1|WARNING_TRANSCRIPT_NO_START_CODON)	GT:DP:AD:AF:RAF:SB:SC:PF	0	0	0	0	0	0.0056	0	0	0	0.011	1	0	0	0.0054	0	0	0	0	0	0
NC_000913.3	1593336	yneO	b4696	T	C	58	PASS	SN=0;STA=1593335;STO=1593336;TYP=SUB;R1P=51;R1M=36;R2P=41;R2M=38;AD=166;DP=10068;MCOV=-41;PPC=166;AF=0.0165;RAF=0.0000;LS=23040;MQS=9960;MQM=60;BQS=6103;BQM=39;EDS=6382;EDM=74;IDS=164328;IDM=992;CED=601;HMP=0;SB=0.9996;EFF=NON_SYNONYMOUS_CODING(MODERATE|MISSENSE|Act/Gct|T1551A|1773|yneO|protein_coding|CODING|b4696|2|1)	GT:DP:AD:AF:RAF:SB:SC:PF	0.0027	0	0.0058	0	0	0	0.0051	1	0	0.0104	0	0	0	0	0	0	0	0	0	0
NC_000913.3	4114997	glpX	NP_418360.1	T	C	55.49	PASS	SN=0;STA=4114996;STO=4114997;TYP=SUB;R1P=132;R1M=154;R2P=112;R2M=162;AD=560;DP=8532;MCOV=-41;PPC=548;AF=0.0656;RAF=0.0000;LS=50832;MQS=33600;MQM=60;BQS=20191;BQM=38;EDS=15411;EDM=68;IDS=552513;IDM=992;CED=601;HMP=0;SB=0.9995;EFF=NON_SYNONYMOUS_CODING(MODERATE|MISSENSE|Acc/Gcc|T195A|336|glpX|protein_coding|CODING|NP_418360.1|1|1)	GT:DP:AD:AF:RAF:SB:SC:PF	1	0	1	1	0	0	0	0	0	0.0098	0	0	0	0	0	0	0	0	0	0
NC_000913.3	1097290	0	0	A	T	37.76	PASS	SN=0;STA=1097289;STO=1097290;TYP=SUB;R1P=17;R1M=8;R2P=12;R2M=5;AD=42;DP=4614;MCOV=-41;PPC=42;AF=0.0091;RAF=0.0000;LS=3854;MQS=463;MQM=40;BQS=1289;BQM=38;EDS=1290;EDM=64;IDS=41244;IDM=992;CED=601;HMP=0;SB=0.9989;EFF=INTERGENIC(MODIFIER||||||||||1)	GT:DP:AD:AF:RAF:SB:SC:PF	0	0	0.0164	0	0	0	0	0	0	0.0084	0	0	0.1842	0.1647	0.0125	0.04	0	0	0	0
NC_000913.3	1230065	hlyE	NP_415700.4	G	T	56.99	PASS	SN=0;STA=1230064;STO=1230065;TYP=SUB;R1P=877;R1M=784;R2P=786;R2M=787;AD=3234;DP=12130;MCOV=-41;PPC=3222;AF=0.2666;RAF=0.0000;LS=294165;MQS=194040;MQM=60;BQS=120405;BQM=38;EDS=89964;EDM=50;IDS=3188706;IDM=992;CED=601;HMP=0;SB=0.9999;EFF=SYNONYMOUS_CODING(LOW|SILENT|tcC/tcA|S110|303|hlyE|protein_coding|CODING|NP_415700.4|1|1)	GT:DP:AD:AF:RAF:SB:SC:PF	0.9974	1	0.9946	0.9974	0.9883	0.0106	0.0056	0	0.0028	0.0083	0.0055	0.0034	0	0.0031	0	0	0	0.003	0.0061	0.0029
NC_000913.3	2064027	cobT	NP_416495.1	A	G	56.01	PASS	SN=0;STA=2064026;STO=2064027;TYP=SUB;R1P=38;R1M=55;R2P=48;R2M=56;AD=197;DP=8589;MCOV=-41;PPC=195;AF=0.0229;RAF=0.0000;LS=17974;MQS=11804;MQM=60;BQS=7099;BQM=38;EDS=5781;EDM=57;IDS=194398;IDM=992;CED=601;HMP=1;SB=0.9995;EFF=SYNONYMOUS_CODING(LOW|SILENT|cgT/cgC|R147|359|cobT|protein_coding|CODING|NP_416495.1|1|1)	GT:DP:AD:AF:RAF:SB:SC:PF	0	0.9948	0	0	0	0.0052	0	0.0065	0	0.0081	0	0	0.0049	0	0	0	0	0	0	0
NC_000913.3	1097299	0	0	A	G	33.1	PASS	SN=0;STA=1097298;STO=1097299;TYP=SUB;R1P=3;R1M=7;R2P=3;R2M=4;AD=17;DP=4924;MCOV=-41;PPC=17;AF=0.0035;RAF=0.0000;LS=1609;MQS=200;MQM=46;BQS=437;BQM=38;EDS=493;EDM=47;IDS=16624;IDM=989;CED=601;HMP=0;SB=0.9991;EFF=INTERGENIC(MODIFIER||||||||||1)	GT:DP:AD:AF:RAF:SB:SC:PF	0	0	0	0	0	0.122	0	0.0072	0	0.008	0	0	0	0	0	0	0	0	0	0
NC_000913.3	766374	mngA	NP_415259.1	G	A	49.11	PASS	SN=0;STA=766373;STO=766374;TYP=SUB;R1P=43;R1M=55;R2P=49;R2M=61;AD=208;DP=7720;MCOV=-41;PPC=208;AF=0.0269;RAF=0.0000;LS=18925;MQS=12480;MQM=60;BQS=7213;BQM=38;EDS=5705;EDM=57;IDS=205375;IDM=989;CED=601;HMP=2;SB=0.9996;EFF=NON_SYNONYMOUS_CODING(MODERATE|MISSENSE|Gcg/Acg|A131T|658|mngA|protein_coding|CODING|NP_415259.1|1|1)	GT:DP:AD:AF:RAF:SB:SC:PF	0	0	0	0	0	0	0	0	0	0.0078	0	0	0	0	0.0056	0	0	0	0	0
NC_000913.3	1133851	flgF	NP_415595.1	A	C	55.43	PASS	SN=0;STA=1133850;STO=1133851;TYP=SUB;R1P=42;R1M=57;R2P=39;R2M=30;AD=168;DP=7152;MCOV=-41;PPC=162;AF=0.0235;RAF=0.0000;LS=15307;MQS=10069;MQM=60;BQS=6082;BQM=38;EDS=4719;EDM=50;IDS=165526;IDM=989;CED=601;HMP=0;SB=0.9999;EFF=NON_SYNONYMOUS_CODING(MODERATE|MISSENSE|aAt/aCt|N17T|251|flgF|protein_coding|CODING|NP_415595.1|1|1)	GT:DP:AD:AF:RAF:SB:SC:PF	0	0	0	0.0129	1	0	0	0	0	0.0078	0	0	0	0	0	0	0	0	0	0
NC_000913.3	1233291	nhaB	NP_415704.1	C	T	55.33	PASS	SN=0;STA=1233290;STO=1233291;TYP=SUB;R1P=25;R1M=49;R2P=46;R2M=54;AD=174;DP=6317;MCOV=-41;PPC=171;AF=0.0275;RAF=0.0000;LS=15793;MQS=10433;MQM=60;BQS=6228;BQM=38;EDS=4936;EDM=50;IDS=171684;IDM=992;CED=601;HMP=0;SB=0.9994;EFF=STOP_GAINED(HIGH|NONSENSE|tGg/tAg|W476*|513|nhaB|protein_coding|CODING|NP_415704.1|1|1)	GT:DP:AD:AF:RAF:SB:SC:PF	0	0	0	0	0	0	0	0	1	0.0077	0	0.0062	0	0	0	0	0	0	0	0
NC_000913.3	3617718	nikD	NP_417936.1	C	G	55.41	PASS	SN=0;STA=3617717;STO=3617718;TYP=SUB;R1P=38;R1M=39;R2P=37;R2M=51;AD=165;DP=6349;MCOV=-41;PPC=165;AF=0.0260;RAF=0.0000;LS=14989;MQS=9900;MQM=60;BQS=5982;BQM=38;EDS=4492;EDM=50;IDS=163014;IDM=989;CED=601;HMP=0;SB=0.9997;EFF=NON_SYNONYMOUS_CODING(MODERATE|MISSENSE|aCa/aGa|T235R|254|nikD|protein_coding|CODING|NP_417936.1|1|1)	GT:DP:AD:AF:RAF:SB:SC:PF	0	0	0	0	0	0	0	0	0	0.0077	0	0	0	0	0	0	0	0	0	0
NC_000913.3	2293886	ccmF	NP_416700.1	C	G	47.47	PASS	SN=0;STA=2293885;STO=2293886;TYP=SUB;R1P=18;R1M=68;R2P=60;R2M=39;AD=185;DP=6933;MCOV=-41;PPC=185;AF=0.0267;RAF=0.0000;LS=16773;MQS=11100;MQM=60;BQS=6572;BQM=38;EDS=5381;EDM=70;IDS=182599;IDM=989;CED=601;HMP=3;SB=0.9995;EFF=NON_SYNONYMOUS_CODING(MODERATE|MISSENSE|cGc/cCc|R340P|647|ccmF|protein_coding|CODING|NP_416700.1|1|1)	GT:DP:AD:AF:RAF:SB:SC:PF	0	0	0	0	0	0	0	0.0065	0	0.0076	0	0	0	0	0.0058	0	0	0	0	0
NC_000913.3	4493815	idnD	NP_418688.1	C	G	55.48	PASS	SN=0;STA=4493814;STO=4493815;TYP=SUB;R1P=48;R1M=52;R2P=54;R2M=57;AD=211;DP=8816;MCOV=-41;PPC=210;AF=0.0239;RAF=0.0000;LS=19286;MQS=12660;MQM=60;BQS=7726;BQM=38;EDS=5635;EDM=65;IDS=208094;IDM=989;CED=601;HMP=0;SB=0.9999;EFF=NON_SYNONYMOUS_CODING(MODERATE|MISSENSE|Gtc/Ctc|V198L|343|idnD|protein_coding|CODING|NP_418688.1|1|1)	GT:DP:AD:AF:RAF:SB:SC:PF	0	0	0	0	0	0	0	0	0	0.0076	0.0043	0	0	0	0	0.0065	1	0	0	0
NC_000913.3	894597	potF	NP_415375.1	G	A	49.61	PASS	SN=0;STA=894596;STO=894597;TYP=SUB;R1P=60;R1M=56;R2P=47;R2M=73;AD=236;DP=8312;MCOV=-41;PPC=236;AF=0.0284;RAF=0.0000;LS=21502;MQS=14160;MQM=60;BQS=8437;BQM=38;EDS=6349;EDM=50;IDS=233075;IDM=989;CED=601;HMP=2;SB=0.9997;EFF=NON_SYNONYMOUS_CODING(MODERATE|MISSENSE|Ggg/Agg|G272R|370|potF|protein_coding|CODING|NP_415375.1|1|1)	GT:DP:AD:AF:RAF:SB:SC:PF	0	0	0	0	0	0	0	0	0	0.0076	0	0	0	0	0	0	0	0	0	0
NC_000913.3	3032190	uacT	NP_417364.2	T	C	49.67	PASS	SN=0;STA=3032189;STO=3032190;TYP=SUB;R1P=38;R1M=78;R2P=55;R2M=69;AD=240;DP=9273;MCOV=-41;PPC=237;AF=0.0259;RAF=0.0000;LS=21856;MQS=14400;MQM=60;BQS=8650;BQM=38;EDS=6858;EDM=68;IDS=236870;IDM=989;CED=601;HMP=2;SB=0.9993;EFF=NON_SYNONYMOUS_CODING(MODERATE|MISSENSE|tTc/tCc|F275S|482|uacT|protein_coding|CODING|NP_417364.2|1|1)	GT:DP:AD:AF:RAF:SB:SC:PF	0	0	0	0	0	0	0.9917	0	0	0.0076	0	0	0	0	0	0	0	0	0	0
NC_000913.3	1316391	0	0	G	T	56.61	PASS	SN=0;STA=1316390;STO=1316391;TYP=SUB;R1P=665;R1M=586;R2P=649;R2M=678;AD=2578;DP=10448;MCOV=-41;PPC=2566;AF=0.2467;RAF=0.0000;LS=234041;MQS=154660;MQM=60;BQS=93348;BQM=38;EDS=71120;EDM=50;IDS=2546295;IDM=989;CED=601;HMP=0;SB=0.9999;EFF=INTERGENIC(MODIFIER||||||||||1)	GT:DP:AD:AF:RAF:SB:SC:PF	0.9929	1	1	0.9925	0.9965	0	0	0	0.004	0.0075	0	0.0036	0	0	0	0	0	0	0	0.0034
NC_000913.3	4600250	dnaC	NP_418781.1	A	T	47.52	PASS	SN=0;STA=4600249;STO=4600250;TYP=SUB;R1P=71;R1M=46;R2P=79;R2M=49;AD=245;DP=9397;MCOV=-41;PPC=243;AF=0.0261;RAF=0.0000;LS=22251;MQS=14700;MQM=60;BQS=8898;BQM=38;EDS=6734;EDM=62;IDS=241776;IDM=989;CED=601;HMP=3;SB=0.9993;EFF=SYNONYMOUS_CODING(LOW|SILENT|ggT/ggA|G242|245|dnaC|protein_coding|CODING|NP_418781.1|1|1)	GT:DP:AD:AF:RAF:SB:SC:PF	0	0	0	0	0.0043	0	0	0	0	0.0075	0	0	0	0.0043	0	0	0.9959	0	0.0042	0
NC_000913.3	2819568	alaS	NP_417177.1	A	G	58.11	PASS	SN=0;STA=2819567;STO=2819568;TYP=SUB;R1P=47;R1M=29;R2P=22;R2M=56;AD=154;DP=9256;MCOV=-41;PPC=154;AF=0.0166;RAF=0.0000;LS=21408;MQS=9240;MQM=60;BQS=5804;BQM=39;EDS=6130;EDM=75;IDS=152481;IDM=992;CED=601;HMP=0;SB=0.9996;EFF=NON_SYNONYMOUS_CODING(MODERATE|MISSENSE|aTt/aCt|I815T|876|alaS|protein_coding|CODING|NP_417177.1|1|1)	GT:DP:AD:AF:RAF:SB:SC:PF	0	0	0	0	0	0	0	1	0	0.0074	0	0	0	0	0	0	0	0	0	0
NC_000913.3	365456	lacZ	NP_414878.1	C	A	55.37	PASS	SN=0;STA=365455;STO=365456;TYP=SUB;R1P=71;R1M=113;R2P=106;R2M=87;AD=377;DP=7408;MCOV=-41;PPC=370;AF=0.0509;RAF=0.0000;LS=34422;MQS=22620;MQM=60;BQS=13532;BQM=38;EDS=9787;EDM=71;IDS=372072;IDM=989;CED=601;HMP=1;SB=0.9998;EFF=NON_SYNONYMOUS_CODING(MODERATE|MISSENSE|Ggt/Tgt|G284C|1024|lacZ|protein_coding|CODING|NP_414878.1|1|1)	GT:DP:AD:AF:RAF:SB:SC:PF	0	0.006	0	0.017	0.0122	0	0.0064	0.0134	0.0055	0.0074	0.006	0	0.995	1	0	0	0	0	0.0056	0.0061
NC_000913.3	2710211	0	0	G	T	47.38	PASS	SN=0;STA=2710210;STO=2710211;TYP=SUB;R1P=64;R1M=54;R2P=88;R2M=69;AD=275;DP=11082;MCOV=-41;PPC=273;AF=0.0248;RAF=0.0000;LS=25111;MQS=16500;MQM=60;BQS=9940;BQM=38;EDS=7250;EDM=72;IDS=271410;IDM=992;CED=601;HMP=3;SB=0.9996;EFF=INTERGENIC(MODIFIER||||||||||1)	GT:DP:AD:AF:RAF:SB:SC:PF	0	0	0.0032	0	0	0.9925	0.0031	0.0065	0	0.0074	0	0	0	0.0036	0	0	0	0	0.0099	0
NC_000913.3	999415	elfC	NP_415460.1	T	A	56.24	PASS	SN=0;STA=999414;STO=999415;TYP=SUB;R1P=92;R1M=78;R2P=93;R2M=84;AD=347;DP=11456;MCOV=-41;PPC=345;AF=0.0303;RAF=0.0000;LS=31630;MQS=20820;MQM=60;BQS=12487;BQM=38;EDS=9494;EDM=50;IDS=342031;IDM=989;CED=601;HMP=0;SB=0.9998;EFF=NON_SYNONYMOUS_CODING(MODERATE|MISSENSE|gTt/gAt|V67D|866|elfC|protein_coding|CODING|NP_415460.1|1|1)	GT:DP:AD:AF:RAF:SB:SC:PF	0	0	0	0	0.0031	0	0	0.0064	0	0.0074	0	0	0	0	0	0	0	0.9971	0	0.0072
NC_000913.3	3972184	wecC	YP_026254.1	G	T	58.04	PASS	SN=0;STA=3972183;STO=3972184;TYP=SUB;R1P=402;R1M=459;R2P=444;R2M=419;AD=1724;DP=7962;MCOV=-41;PPC=1714;AF=0.2165;RAF=0.0000;LS=164709;MQS=103440;MQM=60;BQS=63134;BQM=39;EDS=50843;EDM=74;IDS=1703250;IDM=992;CED=601;HMP=1;SB=0.9999;EFF=NON_SYNONYMOUS_CODING(MODERATE|MISSENSE|Gat/Tat|D309Y|420|wecC|protein_coding|CODING|YP_026254.1|1|1)	GT:DP:AD:AF:RAF:SB:SC:PF	0	0	0	0	0	0.0056	0.0053	0	0	0.0074	0	0	0	0.0046	0	1	0.9946	1	0.9946	1
NC_000913.3	987568	0	0	C	T	56.75	PASS	SN=0;STA=987567;STO=987568;TYP=SUB;R1P=610;R1M=868;R2P=610;R2M=822;AD=2910;DP=11803;MCOV=-41;PPC=2901;AF=0.2465;RAF=0.0000;LS=264437;MQS=174586;MQM=60;BQS=106086;BQM=38;EDS=78901;EDM=50;IDS=2874321;IDM=989;CED=601;HMP=1;SB=0.9994;EFF=INTERGENIC(MODIFIER||||||||||1)	GT:DP:AD:AF:RAF:SB:SC:PF	0	0	0	0	0	0	0	0	0	0.0074	0.9873	0.9966	0.988	0.9825	0.9944	0	0	0	0	0
NC_000913.3	1815212	katE	YP_025308.1	A	C	55.76	PASS	SN=0;STA=1815211;STO=1815212;TYP=SUB;R1P=487;R1M=275;R2P=407;R2M=499;AD=1668;DP=6890;MCOV=-41;PPC=1661;AF=0.2421;RAF=0.0000;LS=151276;MQS=100080;MQM=60;BQS=59954;BQM=38;EDS=46267;EDM=50;IDS=1647172;IDM=989;CED=601;HMP=1;SB=0.9997;EFF=NON_SYNONYMOUS_CODING(MODERATE|MISSENSE|cAt/cCt|H449P|753|katE|protein_coding|CODING|YP_025308.1|1|1)	GT:DP:AD:AF:RAF:SB:SC:PF	0	0	0	0	0	0	0	0	0	0.0074	0.9881	1	1	0.9944	1	0	0	0	0	0
NC_000913.3	2231473	yohK	NP_416647.1	T	A	55.84	PASS	SN=0;STA=2231472;STO=2231473;TYP=SUB;R1P=106;R1M=107;R2P=103;R2M=98;AD=414;DP=7995;MCOV=-41;PPC=412;AF=0.0518;RAF=0.0000;LS=37684;MQS=24840;MQM=60;BQS=14903;BQM=38;EDS=11835;EDM=50;IDS=408685;IDM=989;CED=601;HMP=1;SB=1.0000;EFF=NON_SYNONYMOUS_CODING(MODERATE|MISSENSE|aTt/aAt|I152N|231|yohK|protein_coding|CODING|NP_416647.1|1|1)	GT:DP:AD:AF:RAF:SB:SC:PF	0	0.0053	0	0	0.0052	1	0.9848	0	0	0.0074	0	0	0.0061	0	0	0	0	0	0	0
NC_000913.3	4557361	iraD	NP_418746.4	T	A	55.09	PASS	SN=0;STA=4557360;STO=4557361;TYP=SUB;R1P=43;R1M=67;R2P=47;R2M=47;AD=204;DP=8833;MCOV=-41;PPC=202;AF=0.0231;RAF=0.0000;LS=18598;MQS=12240;MQM=60;BQS=7269;BQM=38;EDS=5517;EDM=67;IDS=201330;IDM=989;CED=601;HMP=0;SB=0.9996;EFF=NON_SYNONYMOUS_CODING(MODERATE|MISSENSE|agT/agA|S123R|130|iraD|protein_coding|CODING|NP_418746.4|1|1)	GT:DP:AD:AF:RAF:SB:SC:PF	0	0	0	0	0	0	0	0	0	0.0073	0	0	0	0	0	0.007	0	0	0.9951	0
NC_000913.3	2217107	yehX	NP_416633.1	G	A	55.12	PASS	SN=0;STA=2217106;STO=2217107;TYP=SUB;R1P=41;R1M=48;R2P=49;R2M=36;AD=174;DP=7640;MCOV=-41;PPC=172;AF=0.0228;RAF=0.0000;LS=15876;MQS=10440;MQM=60;BQS=6270;BQM=38;EDS=4691;EDM=50;IDS=171639;IDM=989;CED=601;HMP=0;SB=0.9999;EFF=STOP_GAINED(HIGH|NONSENSE|Caa/Taa|Q101*|308|yehX|protein_coding|CODING|NP_416633.1|1|1)	GT:DP:AD:AF:RAF:SB:SC:PF	0	0	0	0	0	0.0057	0	0	0	0.0073	0	0	0	0	0	0	0	0	0	1
NC_000913.3	3791813	kbl	NP_418074.1	C	A	54.77	PASS	SN=0;STA=3791812;STO=3791813;TYP=SUB;R1P=44;R1M=41;R2P=46;R2M=36;AD=167;DP=7193;MCOV=-41;PPC=165;AF=0.0232;RAF=0.0000;LS=15143;MQS=10019;MQM=60;BQS=5924;BQM=38;EDS=4698;EDM=50;IDS=162870;IDM=989;CED=601;HMP=0;SB=0.9997;EFF=NON_SYNONYMOUS_CODING(MODERATE|MISSENSE|Ggc/Tgc|G247C|398|kbl|protein_coding|CODING|NP_418074.1|1|1)	GT:DP:AD:AF:RAF:SB:SC:PF	0	0	1	0	0.0066	0.0174	0	0	0	0.0073	0.0063	0	0	0	0	0	0	0	0.0058	0.005
NC_000913.3	3791817	kbl	NP_418074.1	C	A	54.89	PASS	SN=0;STA=3791816;STO=3791817;TYP=SUB;R1P=40;R1M=40;R2P=44;R2M=33;AD=157;DP=7281;MCOV=-41;PPC=155;AF=0.0216;RAF=0.0000;LS=14279;MQS=9420;MQM=60;BQS=5680;BQM=38;EDS=4389;EDM=50;IDS=153282;IDM=989;CED=601;HMP=0;SB=0.9997;EFF=SYNONYMOUS_CODING(LOW|SILENT|gcG/gcT|A245|398|kbl|protein_coding|CODING|NP_418074.1|1|1)	GT:DP:AD:AF:RAF:SB:SC:PF	0	0	0.9873	0	0	0	0	0	0	0.0073	0	0	0	0	0	0	0	0	0.0061	0
NC_000913.3	3627607	rbbA	YP_026225.1	C	A	57.26	PASS	SN=0;STA=3627606;STO=3627607;TYP=SUB;R1P=113;R1M=150;R2P=113;R2M=129;AD=505;DP=7314;MCOV=-41;PPC=494;AF=0.0690;RAF=0.0116;LS=53524;MQS=30294;MQM=60;BQS=17873;BQM=38;EDS=15613;EDM=75;IDS=498875;IDM=992;CED=601;HMP=0;SB=0.9996;EFF=SYNONYMOUS_CODING(LOW|SILENT|ggG/ggT|G644|911|rbbA|protein_coding|CODING|YP_026225.1|1|1)	GT:DP:AD:AF:RAF:SB:SC:PF	0	0.0056	0	0	0	1	0.9752	1	0	0.0072	0	0	0	0	0	0	0	0	0	0.0061
NC_000913.3	587717	ybcH	NP_415099.1	G	C	55.47	PASS	SN=0;STA=587716;STO=587717;TYP=SUB;R1P=50;R1M=46;R2P=52;R2M=42;AD=190;DP=8037;MCOV=-41;PPC=190;AF=0.0236;RAF=0.0000;LS=17331;MQS=11400;MQM=60;BQS=6903;BQM=38;EDS=5057;EDM=50;IDS=187528;IDM=989;CED=601;HMP=1;SB=0.9997;EFF=NON_SYNONYMOUS_CODING(MODERATE|MISSENSE|Ctt/Gtt|L89V|296|ybcH|protein_coding|CODING|NP_415099.1|1|1)	GT:DP:AD:AF:RAF:SB:SC:PF	0	0	0	0	0	0	0	0	0	0.0072	0	0	0	0	0	0	0	0	0	0
NC_000913.3	3610865	yhhS	NP_417930.2	A	T	54.16	PASS	SN=0;STA=3610864;STO=3610865;TYP=SUB;R1P=44;R1M=35;R2P=45;R2M=34;AD=158;DP=6507;MCOV=-41;PPC=154;AF=0.0243;RAF=0.0000;LS=14313;MQS=9480;MQM=60;BQS=5496;BQM=38;EDS=4518;EDM=69;IDS=154222;IDM=989;CED=601;HMP=0;SB=0.9996;EFF=NON_SYNONYMOUS_CODING(MODERATE|MISSENSE|gTt/gAt|V290D|405|yhhS|protein_coding|CODING|NP_417930.2|1|1)	GT:DP:AD:AF:RAF:SB:SC:PF	0	1	0	0	0	0	0	0	0	0.0072	0	0	0	0	0	0	0	0	0	0
NC_000913.3	2386684	yfbL	NP_416774.2	C	A	23.27	PASS	SN=0;STA=2386683;STO=2386684;TYP=SUB;R1P=1;R1M=7;R2P=3;R2M=14;AD=25;DP=11142;MCOV=-41;PPC=25;AF=0.0022;RAF=0.0000;LS=2711;MQS=1500;MQM=60;BQS=518;BQM=39;EDS=808;EDM=73;IDS=23770;IDM=992;CED=601;HMP=1;SB=0.3587;EFF=NON_SYNONYMOUS_CODING(MODERATE|MISSENSE|caC/caA|H275Q|323|yfbL|protein_coding|CODING|NP_416774.2|1|1)	GT:DP:AD:AF:RAF:SB:SC:PF	0	0.0036	0.0033	0	0.0068	0	0.0031	0.0303	0.0031	0.0071	0	0	0	0	0.0035	0.053	0	0.0033	0	0.0037
NC_000913.3	685988	gltJ	NP_415187.1	G	A	56.62	PASS	SN=0;STA=685987;STO=685988;TYP=SUB;R1P=533;R1M=547;R2P=526;R2M=578;AD=2184;DP=8636;MCOV=-41;PPC=2163;AF=0.2529;RAF=0.0000;LS=198416;MQS=131040;MQM=60;BQS=80699;BQM=38;EDS=60238;EDM=50;IDS=2156838;IDM=989;CED=601;HMP=1;SB=0.9999;EFF=SYNONYMOUS_CODING(LOW|SILENT|Ctg/Ttg|L228|246|gltJ|protein_coding|CODING|NP_415187.1|1|1)	GT:DP:AD:AF:RAF:SB:SC:PF	0.9956	1	1	1	1	0	0.0049	0.009	0.0043	0.0071	0	0	0	0	0	0	0.005	0	0	0
NC_000913.3	1782750	ydiT	NP_416215.1	C	A	56.46	PASS	SN=0;STA=1782749;STO=1782750;TYP=SUB;R1P=61;R1M=85;R2P=63;R2M=75;AD=284;DP=9444;MCOV=-41;PPC=284;AF=0.0301;RAF=0.0042;LS=25852;MQS=17040;MQM=60;BQS=10094;BQM=38;EDS=8166;EDM=50;IDS=280508;IDM=989;CED=601;HMP=1;SB=0.9996;EFF=NON_SYNONYMOUS_CODING(MODERATE|MISSENSE|Cac/Aac|H24N|97|ydiT|protein_coding|CODING|NP_416215.1|1|1)	GT:DP:AD:AF:RAF:SB:SC:PF	0	0.0043	0.0083	0.0119	0.008	0	0	0	0	0.0071	0	0	0	0	0	0	0	0.0043	0	0
NC_000913.3	4526377	sgcR	NP_418720.1	C	T	57.88	PASS	SN=0;STA=4526376;STO=4526377;TYP=SUB;R1P=34;R1M=44;R2P=31;R2M=56;AD=165;DP=9789;MCOV=-41;PPC=165;AF=0.0169;RAF=0.0040;LS=22982;MQS=9900;MQM=60;BQS=6123;BQM=39;EDS=6442;EDM=74;IDS=163415;IDM=992;CED=601;HMP=0;SB=0.9993;EFF=NON_SYNONYMOUS_CODING(MODERATE|MISSENSE|cGt/cAt|R171H|260|sgcR|protein_coding|CODING|NP_418720.1|1|1)	GT:DP:AD:AF:RAF:SB:SC:PF	0	0.0037	0	0	0	0	0	0	0	0.0071	0	0	0.0084	0	0	1	0	0	0	0
NC_000913.3	648419	citF	NP_415148.1	C	T	57.95	PASS	SN=0;STA=648418;STO=648419;TYP=SUB;R1P=415;R1M=444;R2P=410;R2M=370;AD=1639;DP=7053;MCOV=-41;PPC=1632;AF=0.2324;RAF=0.0000;LS=155733;MQS=98340;MQM=60;BQS=60732;BQM=39;EDS=45789;EDM=75;IDS=1619286;IDM=992;CED=601;HMP=0;SB=1.0000;EFF=NON_SYNONYMOUS_CODING(MODERATE|MISSENSE|Ggc/Agc|G385S|510|citF|protein_coding|CODING|NP_415148.1|1|1)	GT:DP:AD:AF:RAF:SB:SC:PF	0	0	0	0	0.0068	0	0	0	0	0.0071	0	0	0	0.0064	0	1	1	0.9941	1	1
NC_000913.3	2547929	murP	NP_416924.1	C	A	56.93	PASS	SN=0;STA=2547928;STO=2547929;TYP=SUB;R1P=409;R1M=323;R2P=398;R2M=337;AD=1467;DP=6691;MCOV=-41;PPC=1454;AF=0.2192;RAF=0.0000;LS=139824;MQS=88020;MQM=60;BQS=53054;BQM=39;EDS=41091;EDM=75;IDS=1448945;IDM=992;CED=601;HMP=0;SB=0.9996;EFF=SYNONYMOUS_CODING(LOW|SILENT|ggC/ggA|G419|474|murP|protein_coding|CODING|NP_416924.1|1|1)	GT:DP:AD:AF:RAF:SB:SC:PF	0	0	0	0	0	0	0	0	0	0.0071	0	0	0	0	0	1	1	1	0.9938	0.9942
NC_000913.3	4377461	blc	NP_418573.1	G	A	57.7	PASS	SN=0;STA=4377460;STO=4377461;TYP=SUB;R1P=265;R1M=239;R2P=278;R2M=244;AD=1026;DP=8603;MCOV=-41;PPC=1017;AF=0.1193;RAF=0.0000;LS=100395;MQS=61560;MQM=60;BQS=37215;BQM=39;EDS=29914;EDM=74;IDS=1013023;IDM=992;CED=601;HMP=0;SB=0.9998;EFF=STOP_GAINED(HIGH|NONSENSE|Cag/Tag|Q88*|177|blc|protein_coding|CODING|NP_418573.1|1|1)	GT:DP:AD:AF:RAF:SB:SC:PF	0	0	0.0058	0	0	0	0	0	0.0043	0.0071	0	0	0	0	0	1	0.9953	0.9955	1	0.9956
NC_000913.3	3578247	gntR	YP_026222.1	G	A	54.96	PASS	SN=0;STA=3578246;STO=3578247;TYP=SUB;R1P=46;R1M=30;R2P=44;R2M=21;AD=141;DP=8239;MCOV=-41;PPC=141;AF=0.0171;RAF=0.0000;LS=19612;MQS=8460;MQM=60;BQS=4839;BQM=39;EDS=5518;EDM=75;IDS=137415;IDM=992;CED=601;HMP=1;SB=0.9991;EFF=SYNONYMOUS_CODING(LOW|SILENT|gtC/gtT|V160|331|gntR|protein_coding|CODING|YP_026222.1|1|1)	GT:DP:AD:AF:RAF:SB:SC:PF	0	0	0	0	0	0.0049	0	0	0	0.0071	0	0	0	0	0	0.9928	0	0	0	0
NC_000913.3	664522	rlpA	NP_415166.1	C	T	55.67	PASS	SN=0;STA=664521;STO=664522;TYP=SUB;R1P=46;R1M=54;R2P=54;R2M=48;AD=202;DP=7276;MCOV=-41;PPC=202;AF=0.0278;RAF=0.0000;LS=18344;MQS=12120;MQM=60;BQS=7367;BQM=38;EDS=5337;EDM=50;IDS=199479;IDM=992;CED=601;HMP=0;SB=1.0000;EFF=SYNONYMOUS_CODING(LOW|SILENT|acG/acA|T223|362|rlpA|protein_coding|CODING|NP_415166.1|1|1)	GT:DP:AD:AF:RAF:SB:SC:PF	0	0	0	0	0.006	0	0	0	0	0.0071	0	0	0	0	0	0	0.01	0	0	0
NC_000913.3	1331161	topA	NP_415790.1	G	T	55.84	PASS	SN=0;STA=1331160;STO=1331161;TYP=SUB;R1P=136;R1M=194;R2P=145;R2M=187;AD=662;DP=8575;MCOV=-41;PPC=651;AF=0.0772;RAF=0.0000;LS=60188;MQS=39720;MQM=60;BQS=23902;BQM=38;EDS=18017;EDM=50;IDS=652983;IDM=989;CED=601;HMP=0;SB=0.9995;EFF=SYNONYMOUS_CODING(LOW|SILENT|ccG/ccT|P38|865|topA|protein_coding|CODING|NP_415790.1|1|1)	GT:DP:AD:AF:RAF:SB:SC:PF	0.9955	0	1	0.9956	0.0043	0	0.0043	0	0.0051	0.0071	0	0	0	0	0.0044	0	0	0.0047	0	0
NC_000913.3	1699866	malX	NP_416138.1	C	A	54.59	PASS	SN=0;STA=1699865;STO=1699866;TYP=SUB;R1P=43;R1M=64;R2P=24;R2M=55;AD=186;DP=6576;MCOV=-41;PPC=184;AF=0.0283;RAF=0.0000;LS=16943;MQS=11160;MQM=60;BQS=6826;BQM=38;EDS=4654;EDM=70;IDS=183707;IDM=992;CED=601;HMP=0;SB=0.9991;EFF=NON_SYNONYMOUS_CODING(MODERATE|MISSENSE|cCg/cAg|P171Q|530|malX|protein_coding|CODING|NP_416138.1|1|1)	GT:DP:AD:AF:RAF:SB:SC:PF	0	0	0.0229	0.9944	0.0142	0	0	0	0	0.0071	0	0	0	0	0	0	0.0063	0.0123	0	0.0063
NC_000913.3	2684341	glyA	NP_417046.1	C	A	57.12	PASS	SN=0;STA=2684340;STO=2684341;TYP=SUB;R1P=245;R1M=274;R2P=235;R2M=251;AD=1005;DP=8784;MCOV=-41;PPC=994;AF=0.1144;RAF=0.0000;LS=98373;MQS=60300;MQM=60;BQS=36752;BQM=39;EDS=29527;EDM=74;IDS=982396;IDM=992;CED=601;HMP=1;SB=0.9998;EFF=SYNONYMOUS_CODING(LOW|SILENT|gtG/gtT|V389|417|glyA|protein_coding|CODING|NP_417046.1|1|1)	GT:DP:AD:AF:RAF:SB:SC:PF	0	0	0	0.0051	0	0	0	0.007	0.0045	0.007	0	0	0	0	0.0047	1	0.9953	1	0.9953	1
NC_000913.3	2024778	dsrB	NP_416462.1	G	T	56.98	PASS	SN=0;STA=2024777;STO=2024778;TYP=SUB;R1P=525;R1M=612;R2P=539;R2M=619;AD=2295;DP=10536;MCOV=-41;PPC=2282;AF=0.2178;RAF=0.0037;LS=216246;MQS=137680;MQM=60;BQS=83745;BQM=38;EDS=63835;EDM=75;IDS=2267019;IDM=992;CED=601;HMP=0;SB=0.9997;EFF=NON_SYNONYMOUS_CODING(MODERATE|MISSENSE|Cgt/Agt|R16S|62|dsrB|protein_coding|CODING|NP_416462.1|1|1)	GT:DP:AD:AF:RAF:SB:SC:PF	0	0	0	0	0	0	0.0064	0	0	0.007	0	0.0079	0	0.004	0	1	0.9964	1	0.9966	1
NC_000913.3	3824152	spoT	NP_418107.1	C	T	57.85	PASS	SN=0;STA=3824151;STO=3824152;TYP=SUB;R1P=480;R1M=398;R2P=445;R2M=439;AD=1762;DP=8287;MCOV=-41;PPC=1746;AF=0.2126;RAF=0.0000;LS=167891;MQS=105708;MQM=60;BQS=64548;BQM=39;EDS=50512;EDM=75;IDS=1740216;IDM=992;CED=601;HMP=0;SB=0.9998;EFF=NON_SYNONYMOUS_CODING(MODERATE|MISSENSE|Cac/Tac|H585Y|702|spoT|protein_coding|CODING|NP_418107.1|1|1)	GT:DP:AD:AF:RAF:SB:SC:PF	0	0	0	0	0	0.0042	0	0	0	0.007	0	0	0	0	0	0.9937	0.9952	0.9946	1	1
NC_000913.3	2972850	lplT	NP_417312.1	A	G	55.53	PASS	SN=0;STA=2972849;STO=2972850;TYP=SUB;R1P=465;R1M=483;R2P=470;R2M=478;AD=1896;DP=7398;MCOV=-41;PPC=1880;AF=0.2563;RAF=0.0000;LS=172141;MQS=113760;MQM=60;BQS=66650;BQM=38;EDS=51631;EDM=66;IDS=1871301;IDM=992;CED=601;HMP=1;SB=0.9999;EFF=NON_SYNONYMOUS_CODING(MODERATE|MISSENSE|gTc/gCc|V338A|397|lplT|protein_coding|CODING|NP_417312.1|1|1)	GT:DP:AD:AF:RAF:SB:SC:PF	0.9949	0.9949	0.9946	0.9936	0.9871	0	0	0	0	0.007	0	0	0	0	0.0063	0.0076	0	0	0	0
NC_000913.3	2581700	0	0	C	T	54.84	PASS	SN=0;STA=2581699;STO=2581700;TYP=SUB;R1P=55;R1M=44;R2P=48;R2M=34;AD=181;DP=7428;MCOV=-41;PPC=177;AF=0.0244;RAF=0.0000;LS=16487;MQS=10860;MQM=60;BQS=6443;BQM=38;EDS=4801;EDM=50;IDS=178595;IDM=989;CED=601;HMP=0;SB=0.9995;EFF=INTERGENIC(MODIFIER||||||||||1)	GT:DP:AD:AF:RAF:SB:SC:PF	0	0	0	0	0.9944	0	0	0	0	0.007	0	0	0	0	0	0	0	0	0.0057	0
NC_000913.3	2805904	proV	NP_417163.1	G	C	55.23	PASS	SN=0;STA=2805903;STO=2805904;TYP=SUB;R1P=38;R1M=58;R2P=38;R2M=51;AD=185;DP=8404;MCOV=-41;PPC=184;AF=0.0220;RAF=0.0000;LS=16839;MQS=11100;MQM=60;BQS=6787;BQM=38;EDS=4938;EDM=49;IDS=182669;IDM=989;CED=601;HMP=1;SB=0.9994;EFF=NON_SYNONYMOUS_CODING(MODERATE|MISSENSE|Gga/Cga|G364R|400|proV|protein_coding|CODING|NP_417163.1|1|1)	GT:DP:AD:AF:RAF:SB:SC:PF	0	0	0	0.9838	0	0	0	0	0	0.007	0	0	0	0	0	0	0.0046	0	0.0048	0
NC_000913.3	986750	ompF	NP_415449.1	G	T	57.51	PASS	SN=0;STA=986749;STO=986750;TYP=SUB;R1P=33;R1M=39;R2P=31;R2M=40;AD=143;DP=12241;MCOV=-41;PPC=142;AF=0.0117;RAF=0.0000;LS=20063;MQS=8580;MQM=60;BQS=5254;BQM=39;EDS=5680;EDM=75;IDS=141759;IDM=992;CED=601;HMP=1;SB=0.9996;EFF=NON_SYNONYMOUS_CODING(MODERATE|MISSENSE|aCc/aAc|T78N|362|ompF|protein_coding|CODING|NP_415449.1|1|1)	GT:DP:AD:AF:RAF:SB:SC:PF	0	0	0	0	0	0	0.0029	1	0	0.0069	0	0	0	0	0	0	0	0	0	0
NC_000913.3	771544	cydA	NP_415261.2	G	T	56.8	PASS	SN=0;STA=771543;STO=771544;TYP=SUB;R1P=62;R1M=79;R2P=52;R2M=81;AD=274;DP=11250;MCOV=-41;PPC=274;AF=0.0244;RAF=0.0033;LS=24953;MQS=16440;MQM=60;BQS=9784;BQM=38;EDS=8182;EDM=59;IDS=270388;IDM=989;CED=601;HMP=1;SB=0.9994;EFF=NON_SYNONYMOUS_CODING(MODERATE|MISSENSE|atG/atT|M29I|522|cydA|protein_coding|CODING|NP_415261.2|1|1)	GT:DP:AD:AF:RAF:SB:SC:PF	0.003	0.0031	0.0088	0	0.0033	0.0034	0	0.0069	0.0033	0.0069	0.0029	0.0034	0.0032	0	0	0	0.0034	0.0065	0.0068	0.0034
NC_000913.3	4601889	yjjB	NP_418783.2	A	G	56.79	PASS	SN=0;STA=4601888;STO=4601889;TYP=SUB;R1P=41;R1M=31;R2P=31;R2M=37;AD=140;DP=7882;MCOV=-41;PPC=140;AF=0.0178;RAF=0.0000;LS=19474;MQS=8370;MQM=60;BQS=4880;BQM=38;EDS=5482;EDM=75;IDS=138335;IDM=992;CED=601;HMP=1;SB=0.9999;EFF=NON_SYNONYMOUS_CODING(MODERATE|MISSENSE|gTc/gCc|V70A|157|yjjB|protein_coding|CODING|NP_418783.2|1|1)	GT:DP:AD:AF:RAF:SB:SC:PF	0	0.0053	0	0	0	0	0	0.0063	0	0.0069	0	0	0	0	0	0.9925	0.0043	0	0	0.0099
NC_000913.3	3757578	yiaY	YP_026233.1	G	T	46.23	PASS	SN=0;STA=3757577;STO=3757578;TYP=SUB;R1P=107;R1M=55;R2P=115;R2M=66;AD=343;DP=11491;MCOV=-41;PPC=341;AF=0.0298;RAF=0.0000;LS=31386;MQS=20580;MQM=60;BQS=12564;BQM=38;EDS=8708;EDM=49;IDS=338241;IDM=989;CED=601;HMP=1;SB=0.9204;EFF=NON_SYNONYMOUS_CODING(MODERATE|MISSENSE|Ctt/Att|L84I|383|yiaY|protein_coding|CODING|YP_026233.1|1|1)	GT:DP:AD:AF:RAF:SB:SC:PF	0	0	0	0	0	0	0.997	0.0055	0	0.0069	0.003	0	0	0.0031	0	0.011	0	0	0	0
NC_000913.3	894725	potF	NP_415375.1	T	C	56.16	PASS	SN=0;STA=894724;STO=894725;TYP=SUB;R1P=118;R1M=103;R2P=106;R2M=120;AD=447;DP=8754;MCOV=-41;PPC=439;AF=0.0511;RAF=0.0000;LS=40731;MQS=26820;MQM=60;BQS=16286;BQM=39;EDS=12403;EDM=50;IDS=441404;IDM=992;CED=601;HMP=0;SB=1.0000;EFF=SYNONYMOUS_CODING(LOW|SILENT|taT/taC|Y314|370|potF|protein_coding|CODING|NP_415375.1|1|1)	GT:DP:AD:AF:RAF:SB:SC:PF	0	0	0	0	0	0	0	0	0	0.0069	0	0	1	0.9959	0	0.006	0	0	0	0
NC_000913.3	5431	yaaX	NP_414546.1	T	G	55.19	PASS	SN=0;STA=5430;STO=5431;TYP=SUB;R1P=52;R1M=55;R2P=50;R2M=58;AD=215;DP=7457;MCOV=-41;PPC=209;AF=0.0288;RAF=0.0000;LS=19511;MQS=12900;MQM=60;BQS=7695;BQM=38;EDS=5534;EDM=49;IDS=212204;IDM=989;CED=601;HMP=0;SB=0.9998;EFF=NON_SYNONYMOUS_CODING(MODERATE|MISSENSE|aaT/aaG|N66K|98|yaaX|protein_coding|CODING|NP_414546.1|1|1|WARNING_TRANSCRIPT_NO_START_CODON)	GT:DP:AD:AF:RAF:SB:SC:PF	0	0	0	0	0	0	0.005	0	0	0.0069	0	0	0	0	0	0	0	0	0	1
NC_000913.3	1045558	gfcE	NP_415503.1	G	A	54.59	PASS	SN=0;STA=1045557;STO=1045558;TYP=SUB;R1P=46;R1M=41;R2P=70;R2M=34;AD=191;DP=8292;MCOV=-41;PPC=189;AF=0.0230;RAF=0.0000;LS=17410;MQS=11460;MQM=60;BQS=6767;BQM=38;EDS=4924;EDM=50;IDS=188448;IDM=989;CED=601;HMP=1;SB=0.9993;EFF=SYNONYMOUS_CODING(LOW|SILENT|aaC/aaT|N82|379|gfcE|protein_coding|CODING|NP_415503.1|1|1)	GT:DP:AD:AF:RAF:SB:SC:PF	0	0	0.005	0	0	0	0	0	0	0.0069	0	0	0	1	0	0	0	0	0	0
NC_000913.3	1316811	trpA	NP_415776.1	G	A	55.68	PASS	SN=0;STA=1316810;STO=1316811;TYP=SUB;R1P=137;R1M=188;R2P=138;R2M=173;AD=636;DP=8473;MCOV=-41;PPC=634;AF=0.0751;RAF=0.0000;LS=57844;MQS=38160;MQM=60;BQS=23175;BQM=39;EDS=17169;EDM=67;IDS=627960;IDM=992;CED=601;HMP=0;SB=0.9995;EFF=NON_SYNONYMOUS_CODING(MODERATE|MISSENSE|Ccc/Tcc|P138S|268|trpA|protein_coding|CODING|NP_415776.1|1|1)	GT:DP:AD:AF:RAF:SB:SC:PF	0	0	0	0	0	0	0	0	0	0.0069	0.9953	1	0	0	0.9953	0	0	0	0	0
NC_000913.3	1897122	sdaA	NP_416328.1	T	A	56.24	PASS	SN=0;STA=1897121;STO=1897122;TYP=SUB;R1P=138;R1M=194;R2P=140;R2M=188;AD=660;DP=9000;MCOV=-41;PPC=660;AF=0.0733;RAF=0.0000;LS=60014;MQS=39600;MQM=60;BQS=24304;BQM=38;EDS=17753;EDM=58;IDS=651977;IDM=989;CED=601;HMP=1;SB=0.9995;EFF=NON_SYNONYMOUS_CODING(MODERATE|MISSENSE|aTc/aAc|I64N|454|sdaA|protein_coding|CODING|NP_416328.1|1|1|WARNING_TRANSCRIPT_NO_START_CODON)	GT:DP:AD:AF:RAF:SB:SC:PF	0	0	0	0	0	0	0	0	0	0.0069	0.0049	0	0	0	0	0	0	0	0.0046	0
NC_000913.3	2686492	hmp	NP_417047.1	G	A	56.15	PASS	SN=0;STA=2686491;STO=2686492;TYP=SUB;R1P=53;R1M=54;R2P=45;R2M=69;AD=221;DP=9065;MCOV=-41;PPC=221;AF=0.0244;RAF=0.0000;LS=20106;MQS=13260;MQM=60;BQS=8040;BQM=38;EDS=6252;EDM=50;IDS=218215;IDM=992;CED=601;HMP=0;SB=0.9996;EFF=NON_SYNONYMOUS_CODING(MODERATE|MISSENSE|Gcg/Acg|A220T|396|hmp|protein_coding|CODING|NP_417047.1|1|1)	GT:DP:AD:AF:RAF:SB:SC:PF	0	0	0	0	0	0	0	0	0	0.0069	0	0	0	0	0.0102	0	0	0	0	0
NC_000913.3	2814318	luxS	NP_417172.1	G	T	55.55	PASS	SN=0;STA=2814317;STO=2814318;TYP=SUB;R1P=62;R1M=50;R2P=60;R2M=47;AD=219;DP=9037;MCOV=-41;PPC=217;AF=0.0242;RAF=0.0000;LS=19943;MQS=13140;MQM=60;BQS=7913;BQM=38;EDS=5936;EDM=50;IDS=216255;IDM=989;CED=601;HMP=0;SB=0.9996;EFF=NON_SYNONYMOUS_CODING(MODERATE|MISSENSE|gCg/gAg|A139E|171|luxS|protein_coding|CODING|NP_417172.1|1|1)	GT:DP:AD:AF:RAF:SB:SC:PF	0	0	0	0	0	0	0	0	0	0.0069	0	0	0	0	0	0	0	1	0	0.0096
NC_000913.3	3270099	0	0	A	C	31.59	PASS	SN=0;STA=3270098;STO=3270099;TYP=SUB;R1P=39;R1M=95;R2P=41;R2M=95;AD=270;DP=10431;MCOV=-41;PPC=266;AF=0.0259;RAF=0.0000;LS=24576;MQS=14959;MQM=60;BQS=9438;BQM=38;EDS=7808;EDM=50;IDS=266468;IDM=989;CED=601;HMP=0;SB=0.7069;EFF=INTERGENIC(MODIFIER||||||||||1)	GT:DP:AD:AF:RAF:SB:SC:PF	0	0	0	0.008	0	0	0	0	1	0.0069	0	0	0	0	0.0038	0	0.0034	0	0	0
NC_000913.3	2621764	purM	NP_416994.1	C	T	57.95	PASS	SN=0;STA=2621763;STO=2621764;TYP=SUB;R1P=133;R1M=150;R2P=137;R2M=130;AD=550;DP=8288;MCOV=-41;PPC=547;AF=0.0664;RAF=0.0043;LS=57660;MQS=33000;MQM=60;BQS=20197;BQM=39;EDS=16149;EDM=74;IDS=543274;IDM=992;CED=601;HMP=0;SB=0.9999;EFF=NON_SYNONYMOUS_CODING(MODERATE|MISSENSE|Cac/Tac|H190Y|345|purM|protein_coding|CODING|NP_416994.1|1|1|WARNING_TRANSCRIPT_NO_START_CODON)	GT:DP:AD:AF:RAF:SB:SC:PF	0	0	0	0.0055	0.0052	0.9949	1	1	0	0.0068	0	0.0113	0	0	0	0	0	0	0	0
NC_000913.3	1684951	tus	NP_416127.1	A	G	57.27	PASS	SN=0;STA=1684950;STO=1684951;TYP=SUB;R1P=124;R1M=120;R2P=134;R2M=122;AD=500;DP=7317;MCOV=-41;PPC=492;AF=0.0683;RAF=0.0000;LS=51710;MQS=30000;MQM=60;BQS=18354;BQM=39;EDS=15434;EDM=75;IDS=493643;IDM=992;CED=601;HMP=0;SB=0.9999;EFF=SYNONYMOUS_CODING(LOW|SILENT|aaA/aaG|K231|309|tus|protein_coding|CODING|NP_416127.1|1|1)	GT:DP:AD:AF:RAF:SB:SC:PF	0	0	0	0.0053	0	1	1	0.9921	0	0.0068	0	0	0	0	0	0	0	0	0	0
NC_000913.3	1828725	astD	NP_416260.1	A	T	56.13	PASS	SN=0;STA=1828724;STO=1828725;TYP=SUB;R1P=438;R1M=350;R2P=417;R2M=401;AD=1606;DP=6611;MCOV=-41;PPC=1593;AF=0.2429;RAF=0.0000;LS=145705;MQS=96360;MQM=60;BQS=58813;BQM=38;EDS=44686;EDM=63;IDS=1585189;IDM=989;CED=601;HMP=0;SB=0.9998;EFF=NON_SYNONYMOUS_CODING(MODERATE|MISSENSE|cTg/cAg|L337Q|492|astD|protein_coding|CODING|NP_416260.1|1|1)	GT:DP:AD:AF:RAF:SB:SC:PF	1	1	1	1	0.9926	0	0	0.0076	0	0.0068	0	0.0066	0	0	0	0.0066	0	0	0	0
NC_000913.3	667850	mrdA	NP_415168.1	C	A	57.73	PASS	SN=0;STA=667849;STO=667850;TYP=SUB;R1P=43;R1M=42;R2P=51;R2M=32;AD=168;DP=8350;MCOV=-41;PPC=167;AF=0.0201;RAF=0.0045;LS=23524;MQS=10080;MQM=60;BQS=6084;BQM=39;EDS=6933;EDM=75;IDS=166338;IDM=992;CED=601;HMP=0;SB=0.9996;EFF=NON_SYNONYMOUS_CODING(MODERATE|MISSENSE|cGc/cTc|R123L|633|mrdA|protein_coding|CODING|NP_415168.1|1|1)	GT:DP:AD:AF:RAF:SB:SC:PF	0	0	0	0	0.0052	0	0	0.0069	0	0.0068	0	0	0.0061	0	0	0.9939	0	0	0	0
NC_000913.3	1926457	exoX	NP_416358.1	G	T	54.12	PASS	SN=0;STA=1926456;STO=1926457;TYP=SUB;R1P=47;R1M=59;R2P=33;R2M=49;AD=188;DP=7883;MCOV=-41;PPC=187;AF=0.0238;RAF=0.0000;LS=17197;MQS=11280;MQM=60;BQS=6550;BQM=38;EDS=4598;EDM=50;IDS=185604;IDM=989;CED=601;HMP=0;SB=0.9995;EFF=NON_SYNONYMOUS_CODING(MODERATE|MISSENSE|aGc/aTc|S113I|220|exoX|protein_coding|CODING|NP_416358.1|1|1)	GT:DP:AD:AF:RAF:SB:SC:PF	1	0	0	0	0	0	0	0.0065	0	0.0068	0	0	0.0055	0.0048	0	0.007	0	0	0.0051	0
NC_000913.3	3760143	selA	NP_418048.1	T	G	56.09	PASS	SN=0;STA=3760142;STO=3760143;TYP=SUB;R1P=243;R1M=234;R2P=214;R2M=236;AD=927;DP=7882;MCOV=-41;PPC=913;AF=0.1176;RAF=0.0000;LS=84153;MQS=55620;MQM=60;BQS=33678;BQM=38;EDS=26516;EDM=50;IDS=915088;IDM=992;CED=601;HMP=1;SB=0.9999;EFF=NON_SYNONYMOUS_CODING(MODERATE|MISSENSE|caA/caC|Q369H|463|selA|protein_coding|CODING|NP_418048.1|1|1)	GT:DP:AD:AF:RAF:SB:SC:PF	0	0	0	0	0	0.0053	0	0	0	0.0068	0.9943	0.9952	1	0.9897	0.9941	0.0067	0	0	0.0055	0.0056
NC_000913.3	513659	ybaT	NP_415019.1	G	C	55.27	PASS	SN=0;STA=513658;STO=513659;TYP=SUB;R1P=97;R1M=77;R2P=78;R2M=93;AD=345;DP=7857;MCOV=-41;PPC=340;AF=0.0439;RAF=0.0000;LS=31340;MQS=20700;MQM=60;BQS=12157;BQM=38;EDS=9512;EDM=50;IDS=340549;IDM=989;CED=601;HMP=1;SB=0.9999;EFF=NON_SYNONYMOUS_CODING(MODERATE|MISSENSE|Gcg/Ccg|A362P|430|ybaT|protein_coding|CODING|NP_415019.1|1|1)	GT:DP:AD:AF:RAF:SB:SC:PF	0	0	0	0.0051	0	0	0	0	0	0.0068	0	0	1	0.9944	0	0	0	0.0058	0.0058	0
NC_000913.3	542244	glxK	NP_415047.1	T	C	46.39	PASS	SN=0;STA=542243;STO=542244;TYP=SUB;R1P=28;R1M=67;R2P=40;R2M=69;AD=204;DP=7540;MCOV=-41;PPC=204;AF=0.0271;RAF=0.0000;LS=18608;MQS=12240;MQM=60;BQS=7369;BQM=38;EDS=5713;EDM=50;IDS=201543;IDM=992;CED=601;HMP=1;SB=0.9204;EFF=SYNONYMOUS_CODING(LOW|SILENT|cgT/cgC|R119|381|glxK|protein_coding|CODING|NP_415047.1|1|1)	GT:DP:AD:AF:RAF:SB:SC:PF	0	0	0	0	0	0	0	0	0	0.0068	0	0	0	0	0	0	0	0	0	0
NC_000913.3	717119	potE	NP_415219.1	AG	A	39.2	PASS	SN=0;STA=717119;STO=717120;TYP=DEL;R1P=61;R1M=112;R2P=60;R2M=117;AD=350;DP=11017;MCOV=-41;PPC=345;AF=0.0318;RAF=0.0000;LS=31855;MQS=21000;MQM=60;BQS=12883;BQM=38;EDS=10340;EDM=50;IDS=345667;IDM=992;CED=601;HMP=6;SB=0.9204;EFF=FRAME_SHIFT(HIGH||ccc/|P382|439|potE|protein_coding|CODING|NP_415219.1|1|1);LOF=(potE|b0692|1|1.00)	GT:DP:AD:AF:RAF:SB:SC:PF	0.003	0.003	0.0101	0.9766	0	0	0.0031	0	0	0.0068	0.0035	0	0.0032	0	0	0	0	0.0034	0	0
NC_000913.3	2009090	yedE	NP_416439.1	A	T	54.55	PASS	SN=0;STA=2009089;STO=2009090;TYP=SUB;R1P=47;R1M=41;R2P=68;R2M=51;AD=207;DP=8076;MCOV=-41;PPC=202;AF=0.0256;RAF=0.0000;LS=18820;MQS=12420;MQM=60;BQS=7356;BQM=38;EDS=5766;EDM=67;IDS=201940;IDM=986;CED=601;HMP=1;SB=0.9996;EFF=NON_SYNONYMOUS_CODING(MODERATE|MISSENSE|Atc/Ttc|I272F|401|yedE|protein_coding|CODING|NP_416439.1|1|1)	GT:DP:AD:AF:RAF:SB:SC:PF	0.005	0	0.0053	0	0.0153	0	0	0	0	0.0068	0.006	0	0	0	0	0	0	0	0.0055	0.9949
NC_000913.3	2116193	wcaL	NP_416548.1	C	T	55.29	PASS	SN=0;STA=2116192;STO=2116193;TYP=SUB;R1P=55;R1M=35;R2P=51;R2M=45;AD=186;DP=8147;MCOV=-41;PPC=186;AF=0.0228;RAF=0.0000;LS=16956;MQS=11160;MQM=60;BQS=6702;BQM=38;EDS=5278;EDM=50;IDS=182213;IDM=989;CED=601;HMP=0;SB=0.9995;EFF=NON_SYNONYMOUS_CODING(MODERATE|MISSENSE|gGt/gAt|G312D|406|wcaL|protein_coding|CODING|NP_416548.1|1|1)	GT:DP:AD:AF:RAF:SB:SC:PF	0	0	0.0055	0	0	0	0	0	0	0.0068	0	0	0	0	0	0	0	0	0	0.0048
NC_000913.3	2179738	yegT	NP_416601.1	T	C	55.42	PASS	SN=0;STA=2179737;STO=2179738;TYP=SUB;R1P=52;R1M=72;R2P=31;R2M=59;AD=214;DP=8535;MCOV=-41;PPC=214;AF=0.0251;RAF=0.0000;LS=19490;MQS=12840;MQM=60;BQS=7704;BQM=38;EDS=5671;EDM=50;IDS=211132;IDM=989;CED=601;HMP=0;SB=0.9993;EFF=SYNONYMOUS_CODING(LOW|SILENT|ggT/ggC|G306|425|yegT|protein_coding|CODING|NP_416601.1|1|1)	GT:DP:AD:AF:RAF:SB:SC:PF	0	0	0	0	0	0	0.9953	0	0	0.0068	0	0	0	0	0	0	0	0	0	0
NC_000913.3	2395153	nuoK	NP_416782.1	C	A	54.75	PASS	SN=0;STA=2395152;STO=2395153;TYP=SUB;R1P=41;R1M=32;R2P=33;R2M=22;AD=128;DP=6049;MCOV=-41;PPC=126;AF=0.0212;RAF=0.0000;LS=11676;MQS=7680;MQM=60;BQS=4669;BQM=38;EDS=3515;EDM=50;IDS=126416;IDM=989;CED=601;HMP=0;SB=0.9995;EFF=NON_SYNONYMOUS_CODING(MODERATE|MISSENSE|Gcc/Tcc|A65S|100|nuoK|protein_coding|CODING|NP_416782.1|1|1)	GT:DP:AD:AF:RAF:SB:SC:PF	0	0	0	0	0	0	0	0	0	0.0068	0	0	0.0077	0	0	0	1	0.0058	0	0
NC_000913.3	2438760	flk	NP_416824.1	C	T	56.59	PASS	SN=0;STA=2438759;STO=2438760;TYP=SUB;R1P=564;R1M=631;R2P=563;R2M=579;AD=2337;DP=9009;MCOV=-41;PPC=2323;AF=0.2594;RAF=0.0000;LS=212338;MQS=140220;MQM=60;BQS=85954;BQM=38;EDS=66182;EDM=58;IDS=2308365;IDM=992;CED=601;HMP=0;SB=0.9999;EFF=STOP_GAINED(HIGH|NONSENSE|Cag/Tag|Q271*|331|flk|protein_coding|CODING|NP_416824.1|1|1)	GT:DP:AD:AF:RAF:SB:SC:PF	0.9955	0.9955	0.9954	1	1	0.0047	0	0	0	0.0068	0.0043	0	0.0051	0	0	0	0	0	0.0043	0
NC_000913.3	2983014	kduD	NP_417319.1	T	A	55.87	PASS	SN=0;STA=2983013;STO=2983014;TYP=SUB;R1P=512;R1M=516;R2P=520;R2M=489;AD=2037;DP=8632;MCOV=-41;PPC=2024;AF=0.2360;RAF=0.0000;LS=184985;MQS=122220;MQM=60;BQS=72860;BQM=38;EDS=56775;EDM=50;IDS=2011509;IDM=992;CED=601;HMP=0;SB=0.9999;EFF=NON_SYNONYMOUS_CODING(MODERATE|MISSENSE|gAg/gTg|E82V|253|kduD|protein_coding|CODING|NP_417319.1|1|1)	GT:DP:AD:AF:RAF:SB:SC:PF	0	0.0126	0.0045	0	0	0.0043	0	0	0	0.0068	1	0.9859	1	1	0.9949	0	0	0	0	0
NC_000913.3	3010349	hyuA	NP_417349.4	G	A	55.43	PASS	SN=0;STA=3010348;STO=3010349;TYP=SUB;R1P=43;R1M=53;R2P=40;R2M=49;AD=185;DP=7817;MCOV=-41;PPC=183;AF=0.0237;RAF=0.0000;LS=16885;MQS=11100;MQM=60;BQS=6656;BQM=38;EDS=5128;EDM=50;IDS=182594;IDM=989;CED=601;HMP=1;SB=0.9996;EFF=NON_SYNONYMOUS_CODING(MODERATE|MISSENSE|Gag/Aag|E108K|461|hyuA|protein_coding|CODING|NP_417349.4|1|1)	GT:DP:AD:AF:RAF:SB:SC:PF	0	0	1	0	0.005	0	0	0	0	0.0068	0	0	0	0	0	0	0	0	0	0
NC_000913.3	4337403	adiY	NP_418540.1	G	T	49.95	PASS	SN=0;STA=4337402;STO=4337403;TYP=SUB;R1P=114;R1M=84;R2P=99;R2M=86;AD=383;DP=12607;MCOV=-41;PPC=380;AF=0.0304;RAF=0.0000;LS=34871;MQS=22980;MQM=60;BQS=14008;BQM=38;EDS=10368;EDM=59;IDS=378285;IDM=989;CED=601;HMP=2;SB=0.9996;EFF=NON_SYNONYMOUS_CODING(MODERATE|MISSENSE|cCa/cAa|P176Q|253|adiY|protein_coding|CODING|NP_418540.1|1|1)	GT:DP:AD:AF:RAF:SB:SC:PF	0	0.0028	0.0107	0.9972	0.0058	0	0.0056	0	0.0029	0.0068	0.0108	0.0028	0	0	0.0057	0	0.006	0.003	0.0032	0.0029
NC_000913.3	1243285	emtA	NP_415711.2	G	T	57.93	PASS	SN=0;STA=1243284;STO=1243285;TYP=SUB;R1P=42;R1M=35;R2P=43;R2M=34;AD=154;DP=8144;MCOV=-41;PPC=153;AF=0.0189;RAF=0.0000;LS=21547;MQS=9233;MQM=60;BQS=5823;BQM=39;EDS=6415;EDM=75;IDS=152044;IDM=992;CED=601;HMP=1;SB=0.9996;EFF=NON_SYNONYMOUS_CODING(MODERATE|MISSENSE|Gcg/Tcg|A36S|203|emtA|protein_coding|CODING|NP_415711.2|1|1|WARNING_TRANSCRIPT_NO_START_CODON)	GT:DP:AD:AF:RAF:SB:SC:PF	0	0	0	0	0	0.0048	0	0.9935	0	0.0067	0	0	0	0	0	0	0	0	0	0
NC_000913.3	511516	0	0	T	C	56.14	PASS	SN=0;STA=511515;STO=511516;TYP=SUB;R1P=133;R1M=148;R2P=173;R2M=167;AD=621;DP=9282;MCOV=-41;PPC=614;AF=0.0669;RAF=0.0000;LS=63823;MQS=37218;MQM=60;BQS=21829;BQM=39;EDS=19421;EDM=75;IDS=612789;IDM=992;CED=601;HMP=0;SB=0.9999;EFF=INTERGENIC(MODIFIER||||||||||1)	GT:DP:AD:AF:RAF:SB:SC:PF	0	0	0.0042	0	0	0.992	0.991	0.9735	0	0.0067	0	0.0042	0.009	0	0.0091	0	0	0	0	0
NC_000913.3	2900297	0	0	CA	C	42.97	PASS	SN=0;STA=2900297;STO=2900298;TYP=DEL;R1P=87;R1M=91;R2P=88;R2M=66;AD=332;DP=12541;MCOV=-41;PPC=325;AF=0.0265;RAF=0.0070;LS=30239;MQS=19920;MQM=60;BQS=12214;BQM=39;EDS=9530;EDM=72;IDS=327539;IDM=992;CED=601;HMP=6;SB=0.9998;EFF=INTERGENIC(MODIFIER||||||||||1)	GT:DP:AD:AF:RAF:SB:SC:PF	0	0.003	0	0	0	0.0027	0.0027	0.0059	0.0027	0.0067	0	0	0.0086	0.003	0.0081	0	0.9321	0.0029	0.0029	0.006
NC_000913.3	1084580	efeB	NP_415538.1	AT	A	42.92	PASS	SN=0;STA=1084580;STO=1084581;TYP=DEL;R1P=65;R1M=78;R2P=62;R2M=58;AD=263;DP=9720;MCOV=-41;PPC=262;AF=0.0271;RAF=0.0048;LS=23977;MQS=15778;MQM=60;BQS=9584;BQM=38;EDS=7788;EDM=60;IDS=259719;IDM=992;CED=601;HMP=6;SB=0.9999;EFF=FRAME_SHIFT(HIGH||tat/|Y402|423|efeB|protein_coding|CODING|NP_415538.1|1|1);LOF=(efeB|b1019|1|1.00)	GT:DP:AD:AF:RAF:SB:SC:PF	0	0	0	0.9586	0.0044	0	0	0	0	0.0067	0	0	0.0042	0	0	0.0068	0	0	0.0042	0
NC_000913.3	3223144	ebgA	YP_026199.1	A	G	55.7	PASS	SN=0;STA=3223143;STO=3223144;TYP=SUB;R1P=54;R1M=40;R2P=59;R2M=61;AD=214;DP=7916;MCOV=-41;PPC=214;AF=0.0270;RAF=0.0000;LS=19541;MQS=12804;MQM=60;BQS=7672;BQM=38;EDS=5752;EDM=50;IDS=211227;IDM=989;CED=601;HMP=0;SB=0.9998;EFF=NON_SYNONYMOUS_CODING(MODERATE|MISSENSE|aAc/aGc|N171S|1030|ebgA|protein_coding|CODING|YP_026199.1|1|1)	GT:DP:AD:AF:RAF:SB:SC:PF	0	0	0	0	0	0	0.0055	0	0.0051	0.0067	0.0054	0	0	0	0.005	0.0068	0	0	0	0
NC_000913.3	855613	ldtB	NP_415340.1	G	T	39.8	PASS	SN=0;STA=855612;STO=855613;TYP=SUB;R1P=92;R1M=34;R2P=80;R2M=46;AD=252;DP=8292;MCOV=-41;PPC=249;AF=0.0304;RAF=0.0000;LS=22801;MQS=15120;MQM=60;BQS=9170;BQM=38;EDS=6604;EDM=50;IDS=248537;IDM=989;CED=601;HMP=1;SB=0.9204;EFF=SYNONYMOUS_CODING(LOW|SILENT|acC/acA|T44|306|ldtB|protein_coding|CODING|NP_415340.1|1|1)	GT:DP:AD:AF:RAF:SB:SC:PF	0	0.0101	0.0042	0	0.0047	0.0097	0.0045	0	0	0.0067	1	0.0055	0.0052	0	0.0089	0	0.0099	0	0.0132	0.0047
NC_000913.3	3847831	uhpC	NP_418123.2	A	G	49.26	PASS	SN=0;STA=3847830;STO=3847831;TYP=SUB;R1P=75;R1M=108;R2P=96;R2M=92;AD=371;DP=7492;MCOV=-41;PPC=365;AF=0.0495;RAF=0.0000;LS=33674;MQS=22244;MQM=60;BQS=13095;BQM=38;EDS=9956;EDM=50;IDS=366105;IDM=989;CED=601;HMP=2;SB=0.9997;EFF=NON_SYNONYMOUS_CODING(MODERATE|MISSENSE|gTc/gCc|V265A|439|uhpC|protein_coding|CODING|NP_418123.2|1|1)	GT:DP:AD:AF:RAF:SB:SC:PF	0	0.0053	0	0	0	0	0	0	0.0045	0.0067	0	0	0.9945	0.9946	0	0	0	0	0	0
NC_000913.3	4059298	typA	YP_026274.1	C	T	55.44	PASS	SN=0;STA=4059297;STO=4059298;TYP=SUB;R1P=57;R1M=53;R2P=46;R2M=51;AD=207;DP=8362;MCOV=-41;PPC=205;AF=0.0248;RAF=0.0000;LS=18814;MQS=12420;MQM=60;BQS=7378;BQM=38;EDS=5751;EDM=50;IDS=204233;IDM=989;CED=601;HMP=0;SB=1.0000;EFF=NON_SYNONYMOUS_CODING(MODERATE|MISSENSE|Ccg/Tcg|P298S|607|typA|protein_coding|CODING|YP_026274.1|1|1|WARNING_TRANSCRIPT_NO_START_CODON)	GT:DP:AD:AF:RAF:SB:SC:PF	0	0	0	0	0	0	0	0	0	0.0067	0	0	0	1	0	0	0	0	0	0
NC_000913.3	4302680	mdtO	NP_418505.2	G	A	54.54	PASS	SN=0;STA=4302679;STO=4302680;TYP=SUB;R1P=38;R1M=45;R2P=42;R2M=48;AD=173;DP=7715;MCOV=-41;PPC=172;AF=0.0224;RAF=0.0000;LS=15767;MQS=10380;MQM=60;BQS=6142;BQM=38;EDS=4444;EDM=50;IDS=170601;IDM=989;CED=601;HMP=0;SB=0.9997;EFF=SYNONYMOUS_CODING(LOW|SILENT|gcC/gcT|A133|683|mdtO|protein_coding|CODING|NP_418505.2|1|1)	GT:DP:AD:AF:RAF:SB:SC:PF	0	0	0	0	0	0	0	0	0.0056	0.0067	0	0	0	0.0051	0	0	0	0.9884	0	0
NC_000913.3	2744204	rplS	NP_417097.1	A	G	57.89	PASS	SN=0;STA=2744203;STO=2744204;TYP=SUB;R1P=45;R1M=44;R2P=45;R2M=34;AD=168;DP=8727;MCOV=-41;PPC=168;AF=0.0193;RAF=0.0000;LS=23588;MQS=10080;MQM=60;BQS=6184;BQM=39;EDS=6462;EDM=74;IDS=166467;IDM=992;CED=601;HMP=0;SB=0.9997;EFF=SYNONYMOUS_CODING(LOW|SILENT|cgT/cgC|R109|115|rplS|protein_coding|CODING|NP_417097.1|1|1)	GT:DP:AD:AF:RAF:SB:SC:PF	0	0	0.0046	0	0	0	0	0.994	0.004	0.0066	0	0	0	0	0	0	0	0	0	0
NC_000913.3	906028	ybjS	NP_415389.2	C	A	55.05	PASS	SN=0;STA=906027;STO=906028;TYP=SUB;R1P=52;R1M=43;R2P=42;R2M=42;AD=179;DP=7729;MCOV=-41;PPC=176;AF=0.0232;RAF=0.0051;LS=16240;MQS=10740;MQM=60;BQS=6336;BQM=39;EDS=4942;EDM=49;IDS=176617;IDM=992;CED=601;HMP=1;SB=0.9998;EFF=SYNONYMOUS_CODING(LOW|SILENT|ctG/ctT|L242|337|ybjS|protein_coding|CODING|NP_415389.2|1|1)	GT:DP:AD:AF:RAF:SB:SC:PF	0	0	0	0	0.9886	0	0.0056	0	0	0.0066	0	0	0	0	0	0	0	0	0	0
NC_000913.3	859842	ybiV	NP_415343.1	A	C	56.07	PASS	SN=0;STA=859841;STO=859842;TYP=SUB;R1P=74;R1M=64;R2P=52;R2M=65;AD=255;DP=9936;MCOV=-41;PPC=255;AF=0.0257;RAF=0.0036;LS=23250;MQS=15300;MQM=60;BQS=9190;BQM=38;EDS=6948;EDM=50;IDS=251577;IDM=989;CED=601;HMP=0;SB=1.0000;EFF=NON_SYNONYMOUS_CODING(MODERATE|MISSENSE|Tct/Gct|S63A|271|ybiV|protein_coding|CODING|NP_415343.1|1|1)	GT:DP:AD:AF:RAF:SB:SC:PF	0	0.996	0	0	0	0	0	0	0.004	0.0066	0	0	0.0037	0	0	0	0	0	0	0
NC_000913.3	1716898	tyrS	NP_416154.1	C	T	57.07	PASS	SN=0;STA=1716897;STO=1716898;TYP=SUB;R1P=266;R1M=241;R2P=283;R2M=293;AD=1083;DP=9146;MCOV=-41;PPC=1076;AF=0.1184;RAF=0.0000;LS=105363;MQS=64980;MQM=60;BQS=39733;BQM=39;EDS=31568;EDM=74;IDS=1069839;IDM=992;CED=601;HMP=0;SB=0.9999;EFF=NON_SYNONYMOUS_CODING(MODERATE|MISSENSE|Gcc/Acc|A109T|424|tyrS|protein_coding|CODING|NP_416154.1|1|1)	GT:DP:AD:AF:RAF:SB:SC:PF	0	0	0	0	0	0	0	0	0	0.0066	0	0	0	0	0	1	0.9958	0.9959	0.9959	0.9911
NC_000913.3	325410	0	0	T	C	56.62	PASS	SN=0;STA=325409;STO=325410;TYP=SUB;R1P=655;R1M=980;R2P=688;R2M=1036;AD=3359;DP=13074;MCOV=-41;PPC=3349;AF=0.2569;RAF=0.0000;LS=305337;MQS=201486;MQM=60;BQS=123533;BQM=39;EDS=89801;EDM=50;IDS=3317545;IDM=992;CED=601;HMP=0;SB=0.9993;EFF=INTERGENIC(MODIFIER||||||||||1)	GT:DP:AD:AF:RAF:SB:SC:PF	0.0028	0.0027	0	0	0	0	0	0	0	0.0066	1	1	1	0.9971	1	0	0	0	0	0
NC_000913.3	912280	hcp	NP_415394.4	G	A	55.71	PASS	SN=0;STA=912279;STO=912280;TYP=SUB;R1P=47;R1M=58;R2P=48;R2M=51;AD=204;DP=7505;MCOV=-41;PPC=203;AF=0.0272;RAF=0.0000;LS=18519;MQS=12166;MQM=60;BQS=7333;BQM=38;EDS=5738;EDM=70;IDS=200963;IDM=989;CED=601;HMP=0;SB=0.9997;EFF=NON_SYNONYMOUS_CODING(MODERATE|MISSENSE|aCc/aTc|T512I|550|hcp|protein_coding|CODING|NP_415394.4|1|1)	GT:DP:AD:AF:RAF:SB:SC:PF	0	0	0	0	0	0.0063	0	0	0	0.0066	0	0	0	0	0	0	0	0.9949	0	0
NC_000913.3	1320526	trpD	NP_415779.1	TA	T	55.22	PASS	SN=0;STA=1320526;STO=1320527;TYP=DEL;R1P=68;R1M=85;R2P=62;R2M=83;AD=298;DP=6246;MCOV=-41;PPC=295;AF=0.0477;RAF=0.0000;LS=27010;MQS=17880;MQM=60;BQS=10650;BQM=38;EDS=8877;EDM=71;IDS=293694;IDM=989;CED=601;HMP=1;SB=0.9995;EFF=FRAME_SHIFT(HIGH||agt/|S286|531|trpD|protein_coding|CODING|NP_415779.1|1|1);LOF=(trpD|b1263|1|1.00)	GT:DP:AD:AF:RAF:SB:SC:PF	0	0	0	0	0	0	0	0	0	0.0066	1	0	0	0	1	0	0	0	0	0
NC_000913.3	2271278	rtn	NP_416681.1	G	A	56.17	PASS	SN=0;STA=2271277;STO=2271278;TYP=SUB;R1P=53;R1M=90;R2P=43;R2M=79;AD=265;DP=10327;MCOV=-41;PPC=261;AF=0.0257;RAF=0.0000;LS=24152;MQS=15900;MQM=60;BQS=9749;BQM=38;EDS=7498;EDM=63;IDS=261696;IDM=989;CED=601;HMP=0;SB=0.9991;EFF=NON_SYNONYMOUS_CODING(MODERATE|MISSENSE|Gtc/Atc|V185I|518|rtn|protein_coding|CODING|NP_416681.1|1|1)	GT:DP:AD:AF:RAF:SB:SC:PF	0	0	0	0	0	0.0038	0	0	1	0.0066	0.0081	0	0	0	0	0	0	0	0	0
NC_000913.3	2271885	rtn	NP_416681.1	A	T	55.84	PASS	SN=0;STA=2271884;STO=2271885;TYP=SUB;R1P=56;R1M=51;R2P=67;R2M=51;AD=225;DP=8508;MCOV=-41;PPC=222;AF=0.0264;RAF=0.0000;LS=20494;MQS=13500;MQM=60;BQS=8172;BQM=38;EDS=6313;EDM=50;IDS=221937;IDM=989;CED=601;HMP=0;SB=0.9997;EFF=NON_SYNONYMOUS_CODING(MODERATE|MISSENSE|gAa/gTa|E387V|518|rtn|protein_coding|CODING|NP_416681.1|1|1)	GT:DP:AD:AF:RAF:SB:SC:PF	0	0	0	0	0	0	0	0	0	0.0066	0	0	0	0	0.0046	0	0	0	0	1
NC_000913.3	2611025	hyfI	NP_416984.1	C	A	55.17	PASS	SN=0;STA=2611024;STO=2611025;TYP=SUB;R1P=45;R1M=51;R2P=46;R2M=49;AD=191;DP=6977;MCOV=-41;PPC=191;AF=0.0274;RAF=0.0000;LS=17325;MQS=11460;MQM=60;BQS=6939;BQM=38;EDS=4927;EDM=64;IDS=188630;IDM=989;CED=601;HMP=0;SB=0.9998;EFF=NON_SYNONYMOUS_CODING(MODERATE|MISSENSE|tCc/tAc|S107Y|252|hyfI|protein_coding|CODING|NP_416984.1|1|1)	GT:DP:AD:AF:RAF:SB:SC:PF	0	0	0	0	0	0	0	0	0	0.0066	0	0	0	0	0	0	0.0057	0	0	0
NC_000913.3	2682962	yphH	NP_417045.4	G	C	47.15	PASS	SN=0;STA=2682961;STO=2682962;TYP=SUB;R1P=46;R1M=79;R2P=55;R2M=71;AD=251;DP=9037;MCOV=-41;PPC=246;AF=0.0278;RAF=0.0000;LS=22762;MQS=15060;MQM=60;BQS=8751;BQM=38;EDS=6715;EDM=50;IDS=247649;IDM=992;CED=601;HMP=3;SB=0.9993;EFF=NON_SYNONYMOUS_CODING(MODERATE|MISSENSE|Gcc/Ccc|A34P|397|yphH|protein_coding|CODING|NP_417045.4|1|1)	GT:DP:AD:AF:RAF:SB:SC:PF	0.9959	0	0	0	0	0	0.0042	0	0	0.0066	0	0	0	0	0.0079	0	0	0	0	0
NC_000913.3	2911929	relA	NP_417264.1	C	A	55.44	PASS	SN=0;STA=2911928;STO=2911929;TYP=SUB;R1P=38;R1M=63;R2P=67;R2M=60;AD=228;DP=7728;MCOV=-41;PPC=228;AF=0.0295;RAF=0.0000;LS=20736;MQS=13680;MQM=60;BQS=7955;BQM=38;EDS=6445;EDM=50;IDS=225144;IDM=989;CED=601;HMP=0;SB=0.9997;EFF=NON_SYNONYMOUS_CODING(MODERATE|MISSENSE|Gcc/Tcc|A575S|744|relA|protein_coding|CODING|NP_417264.1|1|1)	GT:DP:AD:AF:RAF:SB:SC:PF	0	0	0.0061	0	0	0	0	0	0	0.0066	0	0	0	0	0	0	0	0	0	0
NC_000913.3	3995178	dapF	NP_418254.2	T	C	55.08	PASS	SN=0;STA=3995177;STO=3995178;TYP=SUB;R1P=34;R1M=34;R2P=54;R2M=46;AD=168;DP=7447;MCOV=-41;PPC=166;AF=0.0226;RAF=0.0000;LS=15156;MQS=10065;MQM=60;BQS=5985;BQM=38;EDS=4658;EDM=68;IDS=165645;IDM=989;CED=601;HMP=0;SB=0.9998;EFF=SYNONYMOUS_CODING(LOW|SILENT|taT/taC|Y139|274|dapF|protein_coding|CODING|NP_418254.2|1|1)	GT:DP:AD:AF:RAF:SB:SC:PF	0	0	0	0	0.9939	0	0	0	0	0.0066	0	0	0	0	0	0	0	0	0	0.0056
NC_000913.3	3990242	hemC	YP_026260.1	T	C	57.52	PASS	SN=0;STA=3990241;STO=3990242;TYP=SUB;R1P=129;R1M=124;R2P=164;R2M=124;AD=541;DP=8394;MCOV=-41;PPC=533;AF=0.0645;RAF=0.0052;LS=56334;MQS=32460;MQM=60;BQS=19542;BQM=39;EDS=16641;EDM=75;IDS=534391;IDM=992;CED=601;HMP=0;SB=0.9997;EFF=SYNONYMOUS_CODING(LOW|SILENT|aaA/aaG|K175|313|hemC|protein_coding|CODING|YP_026260.1|1|1)	GT:DP:AD:AF:RAF:SB:SC:PF	0	0	0	0	0	1	1	1	0	0.0065	0.0054	0	0	0	0	0.007	0	0	0	0
NC_000913.3	3333049	rpmA	NP_417652.1	T	C	57.27	PASS	SN=0;STA=3333048;STO=3333049;TYP=SUB;R1P=147;R1M=137;R2P=140;R2M=148;AD=572;DP=8774;MCOV=-41;PPC=565;AF=0.0652;RAF=0.0000;LS=58476;MQS=34320;MQM=60;BQS=20901;BQM=38;EDS=16815;EDM=74;IDS=564862;IDM=992;CED=601;HMP=1;SB=1.0000;EFF=NON_SYNONYMOUS_CODING(MODERATE|MISSENSE|aAg/aGg|K24R|85|rpmA|protein_coding|CODING|NP_417652.1|1|1)	GT:DP:AD:AF:RAF:SB:SC:PF	0	0	0.0043	0	0.0046	0.9912	0.9858	1	0	0.0065	0	0	0	0	0	0	0	0	0	0
NC_000913.3	2061578	nac	NP_416493.1	G	T	53.56	PASS	SN=0;STA=2061577;STO=2061578;TYP=SUB;R1P=53;R1M=33;R2P=48;R2M=44;AD=178;DP=10048;MCOV=-41;PPC=177;AF=0.0177;RAF=0.0000;LS=23861;MQS=10680;MQM=60;BQS=5789;BQM=39;EDS=7381;EDM=74;IDS=175578;IDM=992;CED=601;HMP=0;SB=0.9995;EFF=NON_SYNONYMOUS_CODING(MODERATE|MISSENSE|cCg/cAg|P119Q|305|nac|protein_coding|CODING|NP_416493.1|1|1)	GT:DP:AD:AF:RAF:SB:SC:PF	0	0.0044	0.0128	0	0	0.0157	0	0.9821	0	0.0065	0.0036	0	0.0042	0	0	0	0	0.0038	0	0
NC_000913.3	2040102	yedY	NP_416480.1	C	T	22.27	PASS	SN=0;STA=2040101;STO=2040102;TYP=SUB;R1P=4;R1M=1;R2P=5;R2M=2;AD=12;DP=7777;MCOV=-41;PPC=12;AF=0.0015;RAF=0.0000;LS=1580;MQS=720;MQM=60;BQS=235;BQM=34;EDS=465;EDM=75;IDS=11149;IDM=992;CED=601;HMP=0;SB=0.9987;EFF=NON_SYNONYMOUS_CODING(MODERATE|MISSENSE|Cgt/Tgt|R209C|334|yedY|protein_coding|CODING|NP_416480.1|1|1)	GT:DP:AD:AF:RAF:SB:SC:PF	0	0	0	0	0	0	0	0.0196	0	0.0065	0	0	0	0	0	0.0541	0	0.0063	0	0
NC_000913.3	4325948	0	0	A	G	37.42	PASS	SN=0;STA=4325947;STO=4325948;TYP=SUB;R1P=7;R1M=7;R2P=6;R2M=8;AD=28;DP=8366;MCOV=-41;PPC=28;AF=0.0033;RAF=0.0000;LS=3948;MQS=745;MQM=47;BQS=965;BQM=39;EDS=531;EDM=48;IDS=27699;IDM=992;CED=601;HMP=0;SB=0.9997;EFF=INTERGENIC(MODIFIER||||||||||1)	GT:DP:AD:AF:RAF:SB:SC:PF	0	0	0	0	0	0	0	0.0147	0	0.0065	0	0	0	0	0	1	0	0	0	0
NC_000913.3	1885936	yeaX	NP_416317.1	G	T	58.42	PASS	SN=0;STA=1885935;STO=1885936;TYP=SUB;R1P=631;R1M=600;R2P=508;R2M=586;AD=2325;DP=9323;MCOV=-41;PPC=2306;AF=0.2494;RAF=0.0000;LS=220040;MQS=139493;MQM=60;BQS=85558;BQM=39;EDS=65807;EDM=75;IDS=2296370;IDM=992;CED=601;HMP=0;SB=0.9999;EFF=NON_SYNONYMOUS_CODING(MODERATE|MISSENSE|gGc/gTc|G31V|321|yeaX|protein_coding|CODING|NP_416317.1|1|1)	GT:DP:AD:AF:RAF:SB:SC:PF	0	0	0	0	0	0	0	0.0059	0	0.0065	0	0	0	0	0	0.9885	0.9902	1	1	1
NC_000913.3	1084629	efeB	NP_415538.1	C	A	55.6	PASS	SN=0;STA=1084628;STO=1084629;TYP=SUB;R1P=154;R1M=166;R2P=152;R2M=125;AD=597;DP=8590;MCOV=-41;PPC=592;AF=0.0695;RAF=0.0056;LS=54322;MQS=35820;MQM=60;BQS=21137;BQM=38;EDS=16185;EDM=62;IDS=589279;IDM=989;CED=601;HMP=0;SB=0.9999;EFF=NON_SYNONYMOUS_CODING(MODERATE|MISSENSE|agC/agA|S418R|423|efeB|protein_coding|CODING|NP_415538.1|1|1)	GT:DP:AD:AF:RAF:SB:SC:PF	0	0	0.0046	0	0	0.0044	0.0044	0	0	0.0065	0.995	1	0	0	0.9948	0	0	0	0.0051	0
NC_000913.3	1807208	pfkB	NP_416237.3	T	A	56.09	PASS	SN=0;STA=1807207;STO=1807208;TYP=SUB;R1P=52;R1M=47;R2P=89;R2M=52;AD=240;DP=9383;MCOV=-41;PPC=238;AF=0.0256;RAF=0.0043;LS=21880;MQS=14400;MQM=60;BQS=8743;BQM=38;EDS=6983;EDM=59;IDS=236768;IDM=992;CED=601;HMP=1;SB=0.9994;EFF=NON_SYNONYMOUS_CODING(MODERATE|MISSENSE|gTa/gAa|V280E|309|pfkB|protein_coding|CODING|NP_416237.3|1|1)	GT:DP:AD:AF:RAF:SB:SC:PF	0.005	1	0	0	0	0	0	0	0	0.0065	0	0	0	0	0	0	0.0041	0	0	0
NC_000913.3	3493633	tsgA	NP_417823.1	G	T	58.44	PASS	SN=0;STA=3493632;STO=3493633;TYP=SUB;R1P=301;R1M=229;R2P=285;R2M=215;AD=1030;DP=8737;MCOV=-41;PPC=1019;AF=0.1179;RAF=0.0000;LS=102413;MQS=61790;MQM=60;BQS=37852;BQM=39;EDS=31163;EDM=75;IDS=1017515;IDM=992;CED=601;HMP=0;SB=0.9995;EFF=NON_SYNONYMOUS_CODING(MODERATE|MISSENSE|Ggt/Tgt|G356C|393|tsgA|protein_coding|CODING|NP_417823.1|1|1)	GT:DP:AD:AF:RAF:SB:SC:PF	0.0047	0	0	0	0.0044	0.0049	0.0092	0	0	0.0065	0	0.0048	0	0	0	1	0.9954	1	0.9955	1
NC_000913.3	1879062	yeaQ	NP_416309.1	A	G	56.24	PASS	SN=0;STA=1879061;STO=1879062;TYP=SUB;R1P=81;R1M=64;R2P=96;R2M=70;AD=311;DP=11213;MCOV=-41;PPC=310;AF=0.0277;RAF=0.0000;LS=28391;MQS=18660;MQM=60;BQS=11287;BQM=38;EDS=8662;EDM=50;IDS=307317;IDM=992;CED=601;HMP=0;SB=0.9995;EFF=NON_SYNONYMOUS_CODING(MODERATE|MISSENSE|gTt/gCt|V65A|82|yeaQ|protein_coding|CODING|NP_416309.1|1|1)	GT:DP:AD:AF:RAF:SB:SC:PF	0	0.0038	0	0	0	0	0	0	0.0031	0.0065	0	0	0	0.0035	0	0.0069	0	0	0	0
NC_000913.3	3111462	yghE	b2969	G	A	55.22	PASS	SN=0;STA=3111461;STO=3111462;TYP=SUB;R1P=51;R1M=44;R2P=31;R2M=48;AD=174;DP=7303;MCOV=-41;PPC=169;AF=0.0238;RAF=0.0000;LS=15896;MQS=10440;MQM=60;BQS=6311;BQM=38;EDS=4729;EDM=71;IDS=171693;IDM=989;CED=601;HMP=0;SB=0.9998;EFF=NON_SYNONYMOUS_CODING(MODERATE|MISSENSE|aCg/aTg|T210M|320|yghE|protein_coding|CODING|b2969|1|1|WARNING_TRANSCRIPT_NO_START_CODON)	GT:DP:AD:AF:RAF:SB:SC:PF	0	0	0	0	0	0	0.0063	0	0	0.0065	0	0	0	0	0	0.0061	0	0.0054	1	0.0054
NC_000913.3	956415	ycaO	NP_415425.4	A	G	47.71	PASS	SN=0;STA=956414;STO=956415;TYP=SUB;R1P=127;R1M=116;R2P=135;R2M=109;AD=487;DP=9353;MCOV=-41;PPC=486;AF=0.0521;RAF=0.0000;LS=44363;MQS=29220;MQM=60;BQS=17827;BQM=38;EDS=13458;EDM=54;IDS=481054;IDM=989;CED=601;HMP=3;SB=0.9997;EFF=NON_SYNONYMOUS_CODING(MODERATE|MISSENSE|cTc/cCc|L73P|586|ycaO|protein_coding|CODING|NP_415425.4|1|1)	GT:DP:AD:AF:RAF:SB:SC:PF	0	0	0	0	0	0	0	0	0	0.0065	0	0.0038	0	0	0	0.0058	0	0	0	0
NC_000913.3	4467176	treR	NP_418662.1	A	T	55.58	PASS	SN=0;STA=4467175;STO=4467176;TYP=SUB;R1P=125;R1M=105;R2P=104;R2M=130;AD=464;DP=9025;MCOV=-41;PPC=454;AF=0.0514;RAF=0.0000;LS=42272;MQS=27820;MQM=60;BQS=16560;BQM=38;EDS=12887;EDM=55;IDS=458151;IDM=992;CED=601;HMP=0;SB=0.9999;EFF=NON_SYNONYMOUS_CODING(MODERATE|MISSENSE|gTg/gAg|V24E|315|treR|protein_coding|CODING|NP_418662.1|1|1)	GT:DP:AD:AF:RAF:SB:SC:PF	0	0	0	0	0	0	0.0045	0	0	0.0065	0	0	1	0.992	0	0.0055	0	0	0	0
NC_000913.3	112019	zapD	NP_414644.1	T	C	55.85	PASS	SN=0;STA=112018;STO=112019;TYP=SUB;R1P=51;R1M=62;R2P=46;R2M=51;AD=210;DP=9083;MCOV=-41;PPC=207;AF=0.0231;RAF=0.0000;LS=19096;MQS=12600;MQM=60;BQS=7749;BQM=38;EDS=5839;EDM=61;IDS=207378;IDM=992;CED=601;HMP=0;SB=0.9997;EFF=NON_SYNONYMOUS_CODING(MODERATE|MISSENSE|aAc/aGc|N194S|247|zapD|protein_coding|CODING|NP_414644.1|1|1)	GT:DP:AD:AF:RAF:SB:SC:PF	0	0	0	0	0	0	0.9952	0	0	0.0065	0	0	0	0	0	0	0	0	0	0
NC_000913.3	284836	yagF	NP_414803.1	G	T	54.95	PASS	SN=0;STA=284835;STO=284836;TYP=SUB;R1P=130;R1M=75;R2P=93;R2M=90;AD=388;DP=6572;MCOV=-41;PPC=387;AF=0.0590;RAF=0.0000;LS=35299;MQS=23250;MQM=60;BQS=13989;BQM=38;EDS=10437;EDM=50;IDS=382907;IDM=989;CED=601;HMP=0;SB=0.9995;EFF=NON_SYNONYMOUS_CODING(MODERATE|MISSENSE|Ggc/Tgc|G546C|655|yagF|protein_coding|CODING|NP_414803.1|1|1)	GT:DP:AD:AF:RAF:SB:SC:PF	0.9781	0	1	1	0	0	0.007	0	0	0.0065	0.0089	0	0	0	0	0	0	0	0	0
NC_000913.3	1382768	ompG	NP_415835.1	A	T	56.51	PASS	SN=0;STA=1382767;STO=1382768;TYP=SUB;R1P=457;R1M=340;R2P=480;R2M=344;AD=1621;DP=10940;MCOV=-41;PPC=1607;AF=0.1482;RAF=0.0000;LS=147423;MQS=97260;MQM=60;BQS=58925;BQM=38;EDS=46597;EDM=50;IDS=1599861;IDM=989;CED=601;HMP=1;SB=0.9995;EFF=NON_SYNONYMOUS_CODING(MODERATE|MISSENSE|gaA/gaT|E274D|301|ompG|protein_coding|CODING|NP_415835.1|1|1)	GT:DP:AD:AF:RAF:SB:SC:PF	0.9963	0.9962	0.9965	0.9965	0.9965	0	0.01	0	0	0.0065	0	0.0033	0	0	0	0	0.0037	0	0	0
NC_000913.3	1786878	ppsA	NP_416217.1	C	T	55.87	PASS	SN=0;STA=1786877;STO=1786878;TYP=SUB;R1P=724;R1M=480;R2P=676;R2M=428;AD=2308;DP=9234;MCOV=-41;PPC=2300;AF=0.2499;RAF=0.0000;LS=209716;MQS=138480;MQM=60;BQS=84186;BQM=38;EDS=60488;EDM=50;IDS=2279380;IDM=989;CED=601;HMP=1;SB=0.9993;EFF=NON_SYNONYMOUS_CODING(MODERATE|MISSENSE|Gac/Aac|D79N|792|ppsA|protein_coding|CODING|NP_416217.1|1|1)	GT:DP:AD:AF:RAF:SB:SC:PF	0	0	0	0	0	0	0	0	0	0.0065	0.996	0.9955	1	1	1	0	0	0	0	0
NC_000913.3	3559914	glpR	b3423	G	A	54.26	PASS	SN=0;STA=3559913;STO=3559914;TYP=SUB;R1P=56;R1M=30;R2P=37;R2M=33;AD=156;DP=6845;MCOV=-41;PPC=153;AF=0.0228;RAF=0.0000;LS=14180;MQS=9360;MQM=60;BQS=5536;BQM=38;EDS=4057;EDM=49;IDS=154048;IDM=992;CED=601;HMP=0;SB=0.9994;EFF=SYNONYMOUS_CODING(LOW|SILENT|gaC/gaT|D230|251|glpR|protein_coding|CODING|b3423|2|1)	GT:DP:AD:AF:RAF:SB:SC:PF	0	0	0	0	0	0	0	0	0	0.0065	0	0.9935	0	0	0	0	0	0	0	0
NC_000913.3	3646097	rlmJ	NP_417956.1	C	A	55.07	PASS	SN=0;STA=3646096;STO=3646097;TYP=SUB;R1P=43;R1M=57;R2P=58;R2M=37;AD=195;DP=7887;MCOV=-41;PPC=191;AF=0.0247;RAF=0.0000;LS=17688;MQS=11694;MQM=60;BQS=6857;BQM=38;EDS=5369;EDM=68;IDS=192302;IDM=989;CED=601;HMP=0;SB=0.9999;EFF=NON_SYNONYMOUS_CODING(MODERATE|MISSENSE|tCc/tAc|S238Y|280|rlmJ|protein_coding|CODING|NP_417956.1|1|1)	GT:DP:AD:AF:RAF:SB:SC:PF	0.0106	0	0	0	0.005	0	0	0	0	0.0065	0	0	0	0	0.0053	0	0	1	0	0
NC_000913.3	4065748	yihO	YP_026275.1	G	A	55.92	PASS	SN=0;STA=4065747;STO=4065748;TYP=SUB;R1P=55;R1M=79;R2P=61;R2M=66;AD=261;DP=9742;MCOV=-41;PPC=253;AF=0.0268;RAF=0.0000;LS=23760;MQS=15660;MQM=60;BQS=9417;BQM=38;EDS=7212;EDM=50;IDS=257502;IDM=992;CED=601;HMP=1;SB=0.9996;EFF=SYNONYMOUS_CODING(LOW|SILENT|Ctg/Ttg|L7|467|yihO|protein_coding|CODING|YP_026275.1|1|1)	GT:DP:AD:AF:RAF:SB:SC:PF	0	0	0	0	0	0.0038	0	0	0	0.0065	0	0	0	0	0	0	0.0041	0.9961	0	0
NC_000913.3	4259989	zur	NP_418470.4	T	A	55.68	PASS	SN=0;STA=4259988;STO=4259989;TYP=SUB;R1P=11;R1M=67;R2P=64;R2M=44;AD=186;DP=8766;MCOV=-41;PPC=186;AF=0.0212;RAF=0.0000;LS=16919;MQS=11160;MQM=60;BQS=6793;BQM=38;EDS=5157;EDM=64;IDS=183604;IDM=989;CED=601;HMP=0;SB=0.9994;EFF=SYNONYMOUS_CODING(LOW|SILENT|acA/acT|T5|171|zur|protein_coding|CODING|NP_418470.4|1|1)	GT:DP:AD:AF:RAF:SB:SC:PF	0	0	0	0	0	0	0	0	0	0.0065	0	0	0	0	0	0	0	0.0045	0.0045	0
NC_000913.3	4478612	rraB	NP_418676.1	A	G	50.08	PASS	SN=0;STA=4478611;STO=4478612;TYP=SUB;R1P=591;R1M=763;R2P=644;R2M=681;AD=2679;DP=10588;MCOV=-41;PPC=2673;AF=0.2530;RAF=0.0000;LS=243557;MQS=160738;MQM=60;BQS=98661;BQM=38;EDS=72466;EDM=50;IDS=2645211;IDM=989;CED=601;HMP=2;SB=0.9997;EFF=NON_SYNONYMOUS_CODING(MODERATE|MISSENSE|gAa/gGa|E47G|138|rraB|protein_coding|CODING|NP_418676.1|1|1)	GT:DP:AD:AF:RAF:SB:SC:PF	0.9902	0.9967	0.9933	0.9963	1	0	0	0	0	0.0065	0	0	0	0	0	0	0.0037	0	0	0
NC_000913.3	4223491	iclR	NP_418442.2	G	T	57.21	PASS	SN=0;STA=4223490;STO=4223491;TYP=SUB;R1P=38;R1M=33;R2P=29;R2M=41;AD=141;DP=7552;MCOV=-41;PPC=138;AF=0.0187;RAF=0.0000;LS=19476;MQS=8460;MQM=60;BQS=5228;BQM=39;EDS=5117;EDM=75;IDS=139365;IDM=992;CED=601;HMP=1;SB=0.9998;EFF=SYNONYMOUS_CODING(LOW|SILENT|ctC/ctA|L46|274|iclR|protein_coding|CODING|NP_418442.2|1|1)	GT:DP:AD:AF:RAF:SB:SC:PF	0	0	0	0.0054	0	0	0.0058	1	0	0.0064	0.0056	0.0057	0	0	0	0.008	0.0059	0	0.0051	0
NC_000913.3	509429	copA	NP_415017.1	A	G	55.62	PASS	SN=0;STA=509428;STO=509429;TYP=SUB;R1P=44;R1M=54;R2P=37;R2M=44;AD=179;DP=6557;MCOV=-41;PPC=178;AF=0.0273;RAF=0.0000;LS=16432;MQS=10740;MQM=60;BQS=6330;BQM=38;EDS=5165;EDM=74;IDS=176601;IDM=989;CED=601;HMP=0;SB=0.9997;EFF=SYNONYMOUS_CODING(LOW|SILENT|Ttg/Ctg|L651|834|copA|protein_coding|CODING|NP_415017.1|1|1)	GT:DP:AD:AF:RAF:SB:SC:PF	0	0	0	0	0	0	0	0.0238	0	0.0064	0	0.0058	0	0	0	0.0132	0	0	0	0
NC_000913.3	4162454	trmA	NP_418400.1	C	G	56	PASS	SN=0;STA=4162453;STO=4162454;TYP=SUB;R1P=50;R1M=78;R2P=56;R2M=62;AD=246;DP=9537;MCOV=-41;PPC=241;AF=0.0258;RAF=0.0000;LS=22384;MQS=14760;MQM=60;BQS=8833;BQM=38;EDS=7050;EDM=67;IDS=242699;IDM=989;CED=601;HMP=1;SB=0.9995;EFF=NON_SYNONYMOUS_CODING(MODERATE|MISSENSE|Gcg/Ccg|A273P|366|trmA|protein_coding|CODING|NP_418400.1|1|1)	GT:DP:AD:AF:RAF:SB:SC:PF	0	0	1	0.005	0	0	0	0.0058	0	0.0064	0	0	0	0	0	0	0	0	0	0.0045
NC_000913.3	2884226	0	0	G	A	58.43	PASS	SN=0;STA=2884225;STO=2884226;TYP=SUB;R1P=38;R1M=54;R2P=52;R2M=46;AD=190;DP=13909;MCOV=-41;PPC=188;AF=0.0137;RAF=0.0000;LS=26340;MQS=11400;MQM=60;BQS=7020;BQM=39;EDS=7853;EDM=75;IDS=188197;IDM=992;CED=601;HMP=0;SB=0.9998;EFF=INTERGENIC(MODIFIER||||||||||1)	GT:DP:AD:AF:RAF:SB:SC:PF	0.0022	0	0.0022	0	0	0	0.0023	0	0	0.0064	0	0	0	0	0.0025	1	0	0	0	0.0025
NC_000913.3	2556445	eutC	NP_416935.1	C	T	56.14	PASS	SN=0;STA=2556444;STO=2556445;TYP=SUB;R1P=567;R1M=497;R2P=449;R2M=436;AD=1949;DP=7827;MCOV=-41;PPC=1926;AF=0.2490;RAF=0.0000;LS=177340;MQS=116940;MQM=60;BQS=71533;BQM=38;EDS=52212;EDM=75;IDS=1925123;IDM=989;CED=601;HMP=1;SB=0.9998;EFF=NON_SYNONYMOUS_CODING(MODERATE|MISSENSE|Gag/Aag|E285K|295|eutC|protein_coding|CODING|NP_416935.1|1|1)	GT:DP:AD:AF:RAF:SB:SC:PF	0.9943	1	1	1	1	0	0	0	0	0.0064	0	0	0	0	0	0.0069	0	0.0056	0	0
NC_000913.3	3087229	metK	NP_417417.1	A	G	54.88	PASS	SN=0;STA=3087228;STO=3087229;TYP=SUB;R1P=54;R1M=59;R2P=35;R2M=47;AD=195;DP=8452;MCOV=-41;PPC=192;AF=0.0231;RAF=0.0000;LS=17748;MQS=11700;MQM=60;BQS=6899;BQM=38;EDS=5100;EDM=50;IDS=192284;IDM=989;CED=601;HMP=1;SB=0.9997;EFF=NON_SYNONYMOUS_CODING(MODERATE|MISSENSE|gAc/gGc|D175G|384|metK|protein_coding|CODING|NP_417417.1|1|1)	GT:DP:AD:AF:RAF:SB:SC:PF	0	0	0	0.0045	0.9844	0	0	0	0	0.0064	0	0	0	0	0	0.0056	0	0	0	0.0047
NC_000913.3	275254	0	0	C	T	56.34	PASS	SN=0;STA=275253;STO=275254;TYP=SUB;R1P=59;R1M=66;R2P=68;R2M=75;AD=268;DP=9046;MCOV=-41;PPC=268;AF=0.0296;RAF=0.0000;LS=24363;MQS=16080;MQM=60;BQS=9985;BQM=38;EDS=7187;EDM=50;IDS=264710;IDM=992;CED=601;HMP=0;SB=0.9998;EFF=INTERGENIC(MODIFIER||||||||||1)	GT:DP:AD:AF:RAF:SB:SC:PF	0	0	0	0	0	0	0	0	0	0.0064	0	0	0	0.0088	0	0	0	0	0	0
NC_000913.3	909314	0	0	G	A	55.53	PASS	SN=0;STA=909313;STO=909314;TYP=SUB;R1P=133;R1M=159;R2P=96;R2M=149;AD=537;DP=7442;MCOV=-41;PPC=526;AF=0.0722;RAF=0.0000;LS=48617;MQS=32220;MQM=60;BQS=19718;BQM=38;EDS=14489;EDM=52;IDS=529899;IDM=989;CED=601;HMP=0;SB=0.9995;EFF=INTERGENIC(MODIFIER||||||||||1)	GT:DP:AD:AF:RAF:SB:SC:PF	0.9895	0	1	1	0	0.0057	0	0	0.0054	0.0064	0	0	0	0	0	0	0.0107	0	0	0
NC_000913.3	1256374	0	0	T	G	56.74	PASS	SN=0;STA=1256373;STO=1256374;TYP=SUB;R1P=106;R1M=101;R2P=122;R2M=108;AD=437;DP=15140;MCOV=-41;PPC=434;AF=0.0289;RAF=0.0000;LS=39652;MQS=26220;MQM=60;BQS=16179;BQM=38;EDS=12093;EDM=50;IDS=431517;IDM=989;CED=601;HMP=0;SB=0.9998;EFF=INTERGENIC(MODIFIER||||||||||1)	GT:DP:AD:AF:RAF:SB:SC:PF	0	1	0	0	0	0.0021	0	0	0	0.0064	0	0	0	0	0	0	0	0	0	0.0025
NC_000913.3	1753871	ydhY	NP_416189.1	A	G	56.34	PASS	SN=0;STA=1753870;STO=1753871;TYP=SUB;R1P=194;R1M=306;R2P=162;R2M=306;AD=968;DP=11642;MCOV=-41;PPC=962;AF=0.0831;RAF=0.0000;LS=88086;MQS=58080;MQM=60;BQS=35103;BQM=38;EDS=26445;EDM=62;IDS=956070;IDM=992;CED=601;HMP=0;SB=0.9992;EFF=NON_SYNONYMOUS_CODING(MODERATE|MISSENSE|Tgg/Cgg|W203R|208|ydhY|protein_coding|CODING|NP_416189.1|1|1)	GT:DP:AD:AF:RAF:SB:SC:PF	1	0	0.9908	0.9971	0	0	0.0063	0	0.0031	0.0064	0	0	0	0	0	0	0	0.0029	0	0
NC_000913.3	2493574	0	0	A	C	50.09	PASS	SN=0;STA=2493573;STO=2493574;TYP=SUB;R1P=230;R1M=305;R2P=230;R2M=308;AD=1073;DP=12750;MCOV=-41;PPC=1069;AF=0.0842;RAF=0.0000;LS=97658;MQS=64380;MQM=60;BQS=39234;BQM=38;EDS=29634;EDM=50;IDS=1059787;IDM=989;CED=601;HMP=2;SB=0.9995;EFF=INTERGENIC(MODIFIER||||||||||1)	GT:DP:AD:AF:RAF:SB:SC:PF	0	0	0	0	0.0024	0	0	0	0.0027	0.0064	0.9927	0.9969	0	0	0.9971	0	0.003	0	0	0
NC_000913.3	2822130	0	0	C	T	55.76	PASS	SN=0;STA=2822129;STO=2822130;TYP=SUB;R1P=143;R1M=130;R2P=103;R2M=111;AD=487;DP=10027;MCOV=-41;PPC=484;AF=0.0486;RAF=0.0000;LS=44358;MQS=29220;MQM=60;BQS=17813;BQM=39;EDS=12873;EDM=50;IDS=480674;IDM=992;CED=601;HMP=0;SB=1.0000;EFF=INTERGENIC(MODIFIER||||||||||1)	GT:DP:AD:AF:RAF:SB:SC:PF	0	0	0.004	0.0043	0	0	0	0	0	0.0064	0	0.0041	1	1	0	0	0	0.0044	0.0044	0
NC_000913.3	3585192	ggt	NP_417904.1	C	A	55.69	PASS	SN=0;STA=3585191;STO=3585192;TYP=SUB;R1P=42;R1M=72;R2P=52;R2M=69;AD=235;DP=9054;MCOV=-41;PPC=232;AF=0.0260;RAF=0.0000;LS=21383;MQS=14100;MQM=60;BQS=8502;BQM=38;EDS=6530;EDM=54;IDS=232019;IDM=989;CED=601;HMP=1;SB=0.9993;EFF=SYNONYMOUS_CODING(LOW|SILENT|gtG/gtT|V544|580|ggt|protein_coding|CODING|NP_417904.1|1|1)	GT:DP:AD:AF:RAF:SB:SC:PF	0	0	0.0041	1	0.0051	0	0.0049	0	0	0.0064	0	0	0	0	0	0	0	0.0128	0.005	0
NC_000913.3	4233105	lysC	NP_418448.1	A	G	55.38	PASS	SN=0;STA=4233104;STO=4233105;TYP=SUB;R1P=37;R1M=55;R2P=52;R2M=50;AD=194;DP=8273;MCOV=-41;PPC=192;AF=0.0234;RAF=0.0000;LS=17648;MQS=11640;MQM=60;BQS=7029;BQM=38;EDS=5237;EDM=50;IDS=191512;IDM=992;CED=601;HMP=0;SB=0.9997;EFF=SYNONYMOUS_CODING(LOW|SILENT|ggT/ggC|G43|449|lysC|protein_coding|CODING|NP_418448.1|1|1)	GT:DP:AD:AF:RAF:SB:SC:PF	0.9948	0	0	0	0	0	0	0	0	0.0064	0	0	0	0	0	0	0	0	0	0
NC_000913.3	4631429	slt	NP_418809.4	C	A	56.29	PASS	SN=0;STA=4631428;STO=4631429;TYP=SUB;R1P=499;R1M=463;R2P=442;R2M=442;AD=1846;DP=7570;MCOV=-41;PPC=1835;AF=0.2439;RAF=0.0000;LS=167395;MQS=110760;MQM=60;BQS=66821;BQM=38;EDS=52152;EDM=50;IDS=1823319;IDM=989;CED=601;HMP=0;SB=0.9999;EFF=NON_SYNONYMOUS_CODING(MODERATE|MISSENSE|Cgt/Agt|R233S|645|slt|protein_coding|CODING|NP_418809.4|1|1|WARNING_TRANSCRIPT_NO_START_CODON)	GT:DP:AD:AF:RAF:SB:SC:PF	0	0	0	0	0	0	0	0	0	0.0064	0.9942	1	1	0.9884	0.9952	0	0	0	0	0
NC_000913.3	1708758	rsxC	NP_416146.1	G	C	50.33	PASS	SN=0;STA=1708757;STO=1708758;TYP=SUB;R1P=16;R1M=24;R2P=27;R2M=24;AD=91;DP=7729;MCOV=-41;PPC=91;AF=0.0118;RAF=0.0061;LS=10713;MQS=4156;MQM=60;BQS=3078;BQM=39;EDS=1881;EDM=56;IDS=89765;IDM=992;CED=601;HMP=0;SB=0.9998;EFF=NON_SYNONYMOUS_CODING(MODERATE|MISSENSE|Gaa/Caa|E614Q|740|rsxC|protein_coding|CODING|NP_416146.1|1|1)	GT:DP:AD:AF:RAF:SB:SC:PF	0	0.0053	0	0	0	0.8824	1	1	0	0.0063	0	0	0	0	0	0	0	0	0	0
NC_000913.3	2190470	yehB	NP_416612.1	C	A	57.15	PASS	SN=0;STA=2190469;STO=2190470;TYP=SUB;R1P=38;R1M=38;R2P=33;R2M=32;AD=141;DP=10833;MCOV=-41;PPC=140;AF=0.0130;RAF=0.0000;LS=19323;MQS=8460;MQM=60;BQS=5057;BQM=39;EDS=5794;EDM=75;IDS=139552;IDM=992;CED=601;HMP=0;SB=1.0000;EFF=NON_SYNONYMOUS_CODING(MODERATE|MISSENSE|tgG/tgT|W147C|826|yehB|protein_coding|CODING|NP_416612.1|1|1)	GT:DP:AD:AF:RAF:SB:SC:PF	0.0071	0	0.0029	0.0037	0.0039	0.0065	0	1	0	0.0063	0	0.0034	0.0031	0	0	0	0	0.0032	0	0
NC_000913.3	2481419	emrY	NP_416868.1	A	G	58.18	PASS	SN=0;STA=2481418;STO=2481419;TYP=SUB;R1P=37;R1M=57;R2P=27;R2M=45;AD=166;DP=12913;MCOV=-41;PPC=166;AF=0.0129;RAF=0.0000;LS=23154;MQS=9960;MQM=60;BQS=6248;BQM=39;EDS=6716;EDM=75;IDS=164495;IDM=992;CED=601;HMP=1;SB=0.9993;EFF=NON_SYNONYMOUS_CODING(MODERATE|MISSENSE|gTc/gCc|V253A|512|emrY|protein_coding|CODING|NP_416868.1|1|1)	GT:DP:AD:AF:RAF:SB:SC:PF	0	0	0.0023	0	0	0	0	1	0	0.0063	0	0.003	0	0	0	0	0.0031	0	0	0.0025
NC_000913.3	4179106	rplA	NP_418411.1	C	T	59.88	PASS	SN=0;STA=4179105;STO=4179106;TYP=SUB;R1P=77;R1M=91;R2P=83;R2M=86;AD=337;DP=8922;MCOV=-41;PPC=337;AF=0.0378;RAF=0.0000;LS=47353;MQS=20208;MQM=60;BQS=12806;BQM=39;EDS=13618;EDM=75;IDS=334009;IDM=992;CED=601;HMP=0;SB=0.9998;EFF=SYNONYMOUS_CODING(LOW|SILENT|gcC/gcT|A76|234|rplA|protein_coding|CODING|NP_418411.1|1|1)	GT:DP:AD:AF:RAF:SB:SC:PF	0	0	0	0	0.0046	0.0053	0	1	0	0.0063	0	0	0	0	0	0	0	0	0	0
NC_000913.3	721802	kdpD	NP_415223.1	A	G	55.05	PASS	SN=0;STA=721801;STO=721802;TYP=SUB;R1P=46;R1M=49;R2P=42;R2M=37;AD=174;DP=7768;MCOV=-41;PPC=174;AF=0.0224;RAF=0.0051;LS=15844;MQS=10440;MQM=60;BQS=6174;BQM=38;EDS=4562;EDM=50;IDS=171502;IDM=989;CED=601;HMP=0;SB=1.0000;EFF=SYNONYMOUS_CODING(LOW|SILENT|ggT/ggC|G871|894|kdpD|protein_coding|CODING|NP_415223.1|1|1)	GT:DP:AD:AF:RAF:SB:SC:PF	0	0	0	0	0	0	0	0.0068	0	0.0063	0	0	0	0.0053	0	0	0	0.0055	1	0.0057
NC_000913.3	3018351	ygfK	NP_417354.1	T	G	54.97	PASS	SN=0;STA=3018350;STO=3018351;TYP=SUB;R1P=49;R1M=49;R2P=46;R2M=64;AD=208;DP=7942;MCOV=-41;PPC=204;AF=0.0262;RAF=0.0000;LS=18931;MQS=12480;MQM=60;BQS=7348;BQM=38;EDS=5426;EDM=73;IDS=204811;IDM=989;CED=601;HMP=1;SB=0.9997;EFF=SYNONYMOUS_CODING(LOW|SILENT|cgT/cgG|R764|1032|ygfK|protein_coding|CODING|NP_417354.1|1|1)	GT:DP:AD:AF:RAF:SB:SC:PF	0	0	0	0	0.995	0	0.0128	0.0068	0	0.0063	0.0057	0	0	0	0.0056	0	0	0	0	0.0053
NC_000913.3	2528691	ligA	NP_416906.1	C	T	55.7	PASS	SN=0;STA=2528690;STO=2528691;TYP=SUB;R1P=51;R1M=61;R2P=45;R2M=60;AD=217;DP=8734;MCOV=-41;PPC=216;AF=0.0248;RAF=0.0054;LS=19743;MQS=13020;MQM=60;BQS=7874;BQM=38;EDS=5954;EDM=50;IDS=214195;IDM=989;CED=601;HMP=0;SB=0.9996;EFF=NON_SYNONYMOUS_CODING(MODERATE|MISSENSE|Gtg/Atg|V496M|671|ligA|protein_coding|CODING|NP_416906.1|1|1)	GT:DP:AD:AF:RAF:SB:SC:PF	0	0.0051	0	0	0	0	0	0	0	0.0063	0	0	0	0	1	0	0	0	0	0
NC_000913.3	2051218	yeeJ	NP_416485.4	A	C	55.87	PASS	SN=0;STA=2051217;STO=2051218;TYP=SUB;R1P=62;R1M=82;R2P=74;R2M=62;AD=280;DP=11461;MCOV=-41;PPC=280;AF=0.0244;RAF=0.0032;LS=25443;MQS=16800;MQM=60;BQS=9841;BQM=38;EDS=7676;EDM=70;IDS=276353;IDM=992;CED=601;HMP=0;SB=0.9999;EFF=NON_SYNONYMOUS_CODING(MODERATE|MISSENSE|aAa/aCa|K2094T|2358|yeeJ|protein_coding|CODING|NP_416485.4|1|1)	GT:DP:AD:AF:RAF:SB:SC:PF	0	0	0	0	0.0033	0	0.0036	0	0	0.0063	0	0	0	0	0.0032	0	0	0	0	0
NC_000913.3	3445687	rplF	NP_417764.1	G	T	57.85	PASS	SN=0;STA=3445686;STO=3445687;TYP=SUB;R1P=456;R1M=480;R2P=516;R2M=461;AD=1913;DP=8619;MCOV=-41;PPC=1898;AF=0.2220;RAF=0.0000;LS=181354;MQS=114761;MQM=60;BQS=69936;BQM=39;EDS=54693;EDM=74;IDS=1890341;IDM=992;CED=601;HMP=0;SB=0.9999;EFF=NON_SYNONYMOUS_CODING(MODERATE|MISSENSE|Cgt/Agt|R152S|177|rplF|protein_coding|CODING|NP_417764.1|1|1)	GT:DP:AD:AF:RAF:SB:SC:PF	0.0047	0	0.0052	0	0	0	0.0056	0	0	0.0063	0	0	0.0094	0	0.009	1	1	1	1	1
NC_000913.3	261645	proA	NP_414778.1	A	G	49.54	PASS	SN=0;STA=261644;STO=261645;TYP=SUB;R1P=51;R1M=38;R2P=61;R2M=49;AD=199;DP=8167;MCOV=-41;PPC=199;AF=0.0244;RAF=0.0000;LS=18106;MQS=11940;MQM=60;BQS=7214;BQM=38;EDS=5438;EDM=54;IDS=196595;IDM=989;CED=601;HMP=2;SB=0.9996;EFF=NON_SYNONYMOUS_CODING(MODERATE|MISSENSE|cAg/cGg|Q48R|417|proA|protein_coding|CODING|NP_414778.1|1|1)	GT:DP:AD:AF:RAF:SB:SC:PF	0	0.99	0	0	0	0	0	0	0	0.0063	0	0	0	0	0	0	0	0	0	0
NC_000913.3	699789	umpH	NP_415201.1	A	G	55.2	PASS	SN=0;STA=699788;STO=699789;TYP=SUB;R1P=47;R1M=48;R2P=49;R2M=63;AD=207;DP=8810;MCOV=-41;PPC=202;AF=0.0235;RAF=0.0000;LS=18829;MQS=12420;MQM=60;BQS=7243;BQM=38;EDS=5612;EDM=50;IDS=204153;IDM=989;CED=601;HMP=0;SB=0.9997;EFF=NON_SYNONYMOUS_CODING(MODERATE|MISSENSE|Tgg/Cgg|W180R|250|umpH|protein_coding|CODING|NP_415201.1|1|1)	GT:DP:AD:AF:RAF:SB:SC:PF	0.0103	0.0049	0	0	0	0.995	0	0	0	0.0063	0	0	0	0	0	0	0	0	0	0
NC_000913.3	795250	modA	NP_415284.1	G	A	55.98	PASS	SN=0;STA=795249;STO=795250;TYP=SUB;R1P=76;R1M=56;R2P=68;R2M=74;AD=274;DP=10158;MCOV=-41;PPC=268;AF=0.0270;RAF=0.0000;LS=24888;MQS=16440;MQM=60;BQS=9958;BQM=38;EDS=7516;EDM=50;IDS=270345;IDM=989;CED=601;HMP=0;SB=0.9998;EFF=SYNONYMOUS_CODING(LOW|SILENT|gtG/gtA|V54|257|modA|protein_coding|CODING|NP_415284.1|1|1)	GT:DP:AD:AF:RAF:SB:SC:PF	0.004	0	0.0035	0	0	0	0.004	0	0	0.0063	0.004	0	0	0	0	0	0	0	0.9963	0
NC_000913.3	1113658	yceK	NP_415568.1	AG	A	44.14	PASS	SN=0;STA=1113658;STO=1113659;TYP=DEL;R1P=171;R1M=144;R2P=176;R2M=156;AD=647;DP=8895;MCOV=-41;PPC=647;AF=0.0727;RAF=0.0000;LS=58853;MQS=38820;MQM=60;BQS=23439;BQM=39;EDS=17184;EDM=50;IDS=639193;IDM=992;CED=601;HMP=5;SB=0.9997;EFF=FRAME_SHIFT(HIGH||cag/|Q27|75|yceK|protein_coding|CODING|NP_415568.1|1|1);LOF=(yceK|b1050|1|1.00)	GT:DP:AD:AF:RAF:SB:SC:PF	0	0.0049	0	0	0	0	0	0	0	0.0063	0	0	0	0	0	0	0	0	0	0
NC_000913.3	1186752	pepT	NP_415645.1	A	C	56.33	PASS	SN=0;STA=1186751;STO=1186752;TYP=SUB;R1P=68;R1M=61;R2P=77;R2M=65;AD=271;DP=9701;MCOV=-41;PPC=271;AF=0.0279;RAF=0.0000;LS=24670;MQS=16260;MQM=60;BQS=9816;BQM=38;EDS=7475;EDM=50;IDS=267732;IDM=989;CED=601;HMP=0;SB=0.9997;EFF=NON_SYNONYMOUS_CODING(MODERATE|MISSENSE|aaA/aaC|K303N|408|pepT|protein_coding|CODING|NP_415645.1|1|1)	GT:DP:AD:AF:RAF:SB:SC:PF	0	0.0045	0	0	0	0	0	0	0	0.0063	0	0	0.0047	0	0	0	0	0	0	0
NC_000913.3	1253306	ycgV	NP_415720.1	A	G	55.91	PASS	SN=0;STA=1253305;STO=1253306;TYP=SUB;R1P=123;R1M=106;R2P=150;R2M=118;AD=497;DP=9089;MCOV=-41;PPC=485;AF=0.0547;RAF=0.0000;LS=45128;MQS=29820;MQM=60;BQS=18072;BQM=38;EDS=13696;EDM=50;IDS=490548;IDM=992;CED=601;HMP=1;SB=0.9996;EFF=NON_SYNONYMOUS_CODING(MODERATE|MISSENSE|Tat/Cat|Y883H|955|ycgV|protein_coding|CODING|NP_415720.1|1|1)	GT:DP:AD:AF:RAF:SB:SC:PF	1	0	0	1	0	0	0.0042	0	0	0.0063	0	0	0	0	0	0	0	0.0044	0	0
NC_000913.3	1275922	narX	NP_415740.1	T	A	48.97	PASS	SN=0;STA=1275921;STO=1275922;TYP=SUB;R1P=29;R1M=57;R2P=33;R2M=52;AD=171;DP=8293;MCOV=-41;PPC=170;AF=0.0206;RAF=0.0000;LS=15589;MQS=10260;MQM=60;BQS=6056;BQM=38;EDS=4537;EDM=49;IDS=168837;IDM=989;CED=601;HMP=2;SB=0.9991;EFF=NON_SYNONYMOUS_CODING(MODERATE|MISSENSE|gAt/gTt|D566V|598|narX|protein_coding|CODING|NP_415740.1|1|1)	GT:DP:AD:AF:RAF:SB:SC:PF	0	0	0	0	0	0	0	0	0	0.0063	0	0.0053	0.9882	0	0	0	0	0	0	0
NC_000913.3	1631301	ydfJ	b4600	C	T	46.01	PASS	SN=0;STA=1631300;STO=1631301;TYP=SUB;R1P=186;R1M=255;R2P=207;R2M=240;AD=888;DP=14337;MCOV=-41;PPC=886;AF=0.0619;RAF=0.0000;LS=80749;MQS=53280;MQM=60;BQS=32487;BQM=38;EDS=23559;EDM=50;IDS=876348;IDM=992;CED=601;HMP=4;SB=0.9996;EFF=NON_SYNONYMOUS_CODING(MODERATE|MISSENSE|Gaa/Aaa|E357K|455|ydfJ|protein_coding|CODING|b4600|2|1)	GT:DP:AD:AF:RAF:SB:SC:PF	0	0	0	0	0.0034	0	0	0	0	0.0063	0.9931	1	0.0055	0	1	0	0	0.0033	0.0034	0
NC_000913.3	1836594	ynjB	NP_416268.2	G	T	47.21	PASS	SN=0;STA=1836593;STO=1836594;TYP=SUB;R1P=38;R1M=60;R2P=42;R2M=44;AD=184;DP=7007;MCOV=-41;PPC=184;AF=0.0263;RAF=0.0000;LS=16751;MQS=11040;MQM=60;BQS=6662;BQM=38;EDS=4667;EDM=50;IDS=181848;IDM=989;CED=601;HMP=3;SB=0.9995;EFF=NON_SYNONYMOUS_CODING(MODERATE|MISSENSE|gaG/gaT|E174D|388|ynjB|protein_coding|CODING|NP_416268.2|1|1)	GT:DP:AD:AF:RAF:SB:SC:PF	0	0	0	0	0	0	0	0	0	0.0063	0	0	0	0	0	0	0	0	0	0
NC_000913.3	2492398	frc	NP_416875.1	T	C	56.75	PASS	SN=0;STA=2492397;STO=2492398;TYP=SUB;R1P=634;R1M=870;R2P=618;R2M=837;AD=2959;DP=11936;MCOV=-41;PPC=2952;AF=0.2479;RAF=0.0000;LS=268960;MQS=177540;MQM=60;BQS=107555;BQM=38;EDS=83913;EDM=50;IDS=2922118;IDM=989;CED=601;HMP=0;SB=0.9995;EFF=NON_SYNONYMOUS_CODING(MODERATE|MISSENSE|aAa/aGa|K286R|416|frc|protein_coding|CODING|NP_416875.1|1|1)	GT:DP:AD:AF:RAF:SB:SC:PF	0.0028	0	0	0	0	0	0.0033	0	0	0.0063	0.9968	1	1	0.9964	1	0	0	0.0031	0	0
NC_000913.3	2692195	purL	YP_026170.1	G	A	55.68	PASS	SN=0;STA=2692194;STO=2692195;TYP=SUB;R1P=42;R1M=59;R2P=54;R2M=41;AD=196;DP=7352;MCOV=-41;PPC=196;AF=0.0267;RAF=0.0000;LS=17861;MQS=11760;MQM=60;BQS=7094;BQM=38;EDS=5335;EDM=50;IDS=193480;IDM=989;CED=601;HMP=0;SB=0.9999;EFF=NON_SYNONYMOUS_CODING(MODERATE|MISSENSE|Cgc/Tgc|R1117C|1295|purL|protein_coding|CODING|YP_026170.1|1|1)	GT:DP:AD:AF:RAF:SB:SC:PF	0	0	0.0061	0	0	0	0	0	0	0.0063	0	0	0	0	0	0	0.0053	0	0	0
NC_000913.3	4053898	glnG	NP_418304.1	G	A	54.5	PASS	SN=0;STA=4053897;STO=4053898;TYP=SUB;R1P=48;R1M=51;R2P=36;R2M=51;AD=186;DP=8454;MCOV=-41;PPC=185;AF=0.0220;RAF=0.0000;LS=16911;MQS=11160;MQM=60;BQS=6447;BQM=38;EDS=5164;EDM=50;IDS=183456;IDM=992;CED=601;HMP=0;SB=0.9996;EFF=NON_SYNONYMOUS_CODING(MODERATE|MISSENSE|Cgt/Tgt|R461C|469|glnG|protein_coding|CODING|NP_418304.1|1|1)	GT:DP:AD:AF:RAF:SB:SC:PF	0	0	0	0	0	0	0	0	0	0.0063	0	0	0	0	0	0	0	0.0049	0.9945	0.0044
NC_000913.3	325575	0	0	A	T	46.22	PASS	SN=0;STA=325574;STO=325575;TYP=SUB;R1P=56;R1M=88;R2P=47;R2M=112;AD=303;DP=10298;MCOV=-41;PPC=298;AF=0.0294;RAF=0.0000;LS=27553;MQS=18180;MQM=60;BQS=10380;BQM=38;EDS=8247;EDM=50;IDS=298782;IDM=989;CED=601;HMP=0;SB=0.9204;EFF=INTERGENIC(MODIFIER||||||||||1)	GT:DP:AD:AF:RAF:SB:SC:PF	0.0072	0.0035	0.0072	0.0036	0.9893	0	0.0036	0	0.0036	0.0062	0	0.0042	0.0043	0	0	0	0	0	0.0039	0.0071
NC_000913.3	381167	yaiX	b4579	C	A	55.51	PASS	SN=0;STA=381166;STO=381167;TYP=SUB;R1P=58;R1M=31;R2P=14;R2M=54;AD=157;DP=7456;MCOV=-41;PPC=157;AF=0.0211;RAF=0.0000;LS=14337;MQS=9420;MQM=60;BQS=5745;BQM=38;EDS=4382;EDM=70;IDS=155141;IDM=989;CED=601;HMP=0;SB=0.9997;EFF=STOP_GAINED(HIGH|NONSENSE|Gaa/Taa|E126*|232|yaiX|protein_coding|CODING|b4579|2|1)	GT:DP:AD:AF:RAF:SB:SC:PF	0	0	0.0049	0	0	0	0	0	0	0.0062	0.0094	0	0	0	0	0	0	0	0.0056	0
NC_000913.3	398339	yaiW	NP_414912.1	C	T	55.09	PASS	SN=0;STA=398338;STO=398339;TYP=SUB;R1P=49;R1M=43;R2P=54;R2M=40;AD=186;DP=8717;MCOV=-41;PPC=181;AF=0.0213;RAF=0.0000;LS=16904;MQS=11160;MQM=60;BQS=6589;BQM=38;EDS=5061;EDM=55;IDS=183303;IDM=989;CED=601;HMP=0;SB=0.9996;EFF=SYNONYMOUS_CODING(LOW|SILENT|aaC/aaT|N156|364|yaiW|protein_coding|CODING|NP_414912.1|1|1)	GT:DP:AD:AF:RAF:SB:SC:PF	0.0043	0	0	0.0046	0	0	0	0	0	0.0062	1	0	0.0046	0	0	0	0	0	0	0
NC_000913.3	486841	mscK	NP_414998.1	G	A	56.09	PASS	SN=0;STA=486840;STO=486841;TYP=SUB;R1P=65;R1M=76;R2P=54;R2M=77;AD=272;DP=9376;MCOV=-41;PPC=270;AF=0.0290;RAF=0.0000;LS=24739;MQS=16319;MQM=60;BQS=9791;BQM=39;EDS=7709;EDM=65;IDS=268349;IDM=992;CED=601;HMP=0;SB=0.9996;EFF=NON_SYNONYMOUS_CODING(MODERATE|MISSENSE|atG/atA|M102I|1120|mscK|protein_coding|CODING|NP_414998.1|1|1)	GT:DP:AD:AF:RAF:SB:SC:PF	0	0.0082	0	0	0	0	0	0	0	0.0062	0	0	0	0	0.0043	0	1	0	0	0
NC_000913.3	2987245	0	0	C	A	56.09	PASS	SN=0;STA=2987244;STO=2987245;TYP=SUB;R1P=133;R1M=94;R2P=131;R2M=95;AD=453;DP=14484;MCOV=-41;PPC=451;AF=0.0313;RAF=0.0000;LS=41137;MQS=27145;MQM=60;BQS=16561;BQM=38;EDS=11808;EDM=66;IDS=446827;IDM=989;CED=601;HMP=1;SB=0.9994;EFF=INTERGENIC(MODIFIER||||||||||1)	GT:DP:AD:AF:RAF:SB:SC:PF	0	0.0022	0.0021	0.0021	0.0021	0.0024	0.9887	0	0	0.0062	0	0	0	0	0.0023	0	0	0.0023	0.0025	0
NC_000913.3	3122763	glcB	NP_417450.1	A	G	55.92	PASS	SN=0;STA=3122762;STO=3122763;TYP=SUB;R1P=260;R1M=267;R2P=288;R2M=267;AD=1082;DP=8820;MCOV=-41;PPC=1071;AF=0.1227;RAF=0.0000;LS=98355;MQS=64871;MQM=60;BQS=39167;BQM=38;EDS=28616;EDM=61;IDS=1068092;IDM=992;CED=601;HMP=0;SB=0.9999;EFF=NON_SYNONYMOUS_CODING(MODERATE|MISSENSE|gTg/gCg|V348A|723|glcB|protein_coding|CODING|NP_417450.1|1|1)	GT:DP:AD:AF:RAF:SB:SC:PF	0.0041	0	0	0	0	0	0	0	0.0088	0.0062	1	1	1	0.9951	1	0	0	0.0051	0	0
NC_000913.3	3528118	yrfF	NP_417857.1	G	A	54.65	PASS	SN=0;STA=3528117;STO=3528118;TYP=SUB;R1P=40;R1M=56;R2P=38;R2M=50;AD=184;DP=7371;MCOV=-41;PPC=180;AF=0.0250;RAF=0.0000;LS=16778;MQS=11022;MQM=60;BQS=6585;BQM=38;EDS=4993;EDM=50;IDS=179589;IDM=989;CED=601;HMP=0;SB=0.9995;EFF=SYNONYMOUS_CODING(LOW|SILENT|ctG/ctA|L550|711|yrfF|protein_coding|CODING|NP_417857.1|1|1)	GT:DP:AD:AF:RAF:SB:SC:PF	0	0	0	0	0	1	0	0	0	0.0062	0	0	0	0	0	0	0	0	0	0
NC_000913.3	3531074	yhgE	NP_417861.1	A	G	55.68	PASS	SN=0;STA=3531073;STO=3531074;TYP=SUB;R1P=45;R1M=81;R2P=51;R2M=91;AD=268;DP=10271;MCOV=-41;PPC=267;AF=0.0261;RAF=0.0000;LS=24427;MQS=16080;MQM=60;BQS=9884;BQM=38;EDS=6853;EDM=70;IDS=264725;IDM=989;CED=601;HMP=0;SB=0.9991;EFF=SYNONYMOUS_CODING(LOW|SILENT|Tta/Cta|L456|574|yhgE|protein_coding|CODING|NP_417861.1|1|1)	GT:DP:AD:AF:RAF:SB:SC:PF	0	0	0	0	0	0.0037	0	0	0	0.0062	0	0	0	0.0037	0.0037	0	0	0	0	0
NC_000913.3	3703257	dppD	NP_417998.1	C	T	55.48	PASS	SN=0;STA=3703256;STO=3703257;TYP=SUB;R1P=39;R1M=38;R2P=45;R2M=37;AD=159;DP=7359;MCOV=-41;PPC=155;AF=0.0216;RAF=0.0000;LS=14487;MQS=9540;MQM=60;BQS=5701;BQM=38;EDS=4593;EDM=64;IDS=156866;IDM=989;CED=601;HMP=1;SB=0.9998;EFF=NON_SYNONYMOUS_CODING(MODERATE|MISSENSE|Gag/Aag|E198K|327|dppD|protein_coding|CODING|NP_417998.1|1|1)	GT:DP:AD:AF:RAF:SB:SC:PF	0	0	0.0069	0.0063	1	0	0	0	0	0.0062	0	0	0	0	0	0	0	0	0	0
NC_000913.3	3768987	yibW	b4651	C	T	56.21	PASS	SN=0;STA=3768986;STO=3768987;TYP=SUB;R1P=43;R1M=113;R2P=159;R2M=73;AD=388;DP=13152;MCOV=-41;PPC=387;AF=0.0295;RAF=0.0000;LS=35340;MQS=23280;MQM=60;BQS=13938;BQM=38;EDS=10918;EDM=55;IDS=382923;IDM=989;CED=601;HMP=0;SB=0.9998;EFF=SYNONYMOUS_CODING(LOW|SILENT|ggC/ggT|G32|120|yibW|protein_coding|CODING|b4651|1|1|WARNING_TRANSCRIPT_INCOMPLETE)	GT:DP:AD:AF:RAF:SB:SC:PF	0	0	0	0	0.9974	0	0	0	0	0.0062	0	0	0	0	0	0	0	0	0	0.0023
NC_000913.3	3954839	ilvD	YP_026248.1	G	A	55.71	PASS	SN=0;STA=3954838;STO=3954839;TYP=SUB;R1P=44;R1M=51;R2P=48;R2M=61;AD=204;DP=7376;MCOV=-41;PPC=200;AF=0.0277;RAF=0.0000;LS=18595;MQS=12240;MQM=60;BQS=7500;BQM=38;EDS=5638;EDM=50;IDS=201238;IDM=989;CED=601;HMP=0;SB=0.9996;EFF=SYNONYMOUS_CODING(LOW|SILENT|gtG/gtA|V454|616|ilvD|protein_coding|CODING|YP_026248.1|1|1)	GT:DP:AD:AF:RAF:SB:SC:PF	0	1	0	0	0	0	0	0	0	0.0062	0	0	0	0	0	0	0.0056	0	0	0
NC_000913.3	4289938	nrfC	NP_418496.1	C	T	54.93	PASS	SN=0;STA=4289937;STO=4289938;TYP=SUB;R1P=58;R1M=43;R2P=54;R2M=53;AD=208;DP=7073;MCOV=-41;PPC=208;AF=0.0294;RAF=0.0000;LS=18909;MQS=12480;MQM=60;BQS=7262;BQM=38;EDS=5616;EDM=50;IDS=205446;IDM=989;CED=601;HMP=1;SB=0.9997;EFF=NON_SYNONYMOUS_CODING(MODERATE|MISSENSE|tCg/tTg|S44L|223|nrfC|protein_coding|CODING|NP_418496.1|1|1)	GT:DP:AD:AF:RAF:SB:SC:PF	0.0061	0	0	0	0	0	0	0	0	0.0062	0	0	0	0	0	0	0.006	0	0	0
NC_000913.3	1924821	yobA	NP_416355.1	A	T	48.53	PASS	SN=0;STA=1924820;STO=1924821;TYP=SUB;R1P=48;R1M=36;R2P=37;R2M=33;AD=154;DP=9824;MCOV=-41;PPC=152;AF=0.0157;RAF=0.0000;LS=21405;MQS=9201;MQM=60;BQS=5777;BQM=39;EDS=6586;EDM=75;IDS=152377;IDM=992;CED=601;HMP=3;SB=0.9996;EFF=STOP_GAINED(HIGH|NONSENSE|tTa/tAa|L50*|124|yobA|protein_coding|CODING|NP_416355.1|1|1)	GT:DP:AD:AF:RAF:SB:SC:PF	0.0122	0	0.0036	0	0	0	0	1	0	0.0061	0	0	0	0	0	0.0074	0	0	0	0
NC_000913.3	1911583	yebQ	NP_416342.4	T	C	57.53	PASS	SN=0;STA=1911582;STO=1911583;TYP=SUB;R1P=39;R1M=44;R2P=34;R2M=46;AD=163;DP=8387;MCOV=-41;PPC=163;AF=0.0194;RAF=0.0000;LS=22933;MQS=9780;MQM=60;BQS=5939;BQM=39;EDS=6285;EDM=75;IDS=161271;IDM=992;CED=601;HMP=1;SB=0.9996;EFF=SYNONYMOUS_CODING(LOW|SILENT|gcT/gcC|A436|457|yebQ|protein_coding|CODING|NP_416342.4|1|1)	GT:DP:AD:AF:RAF:SB:SC:PF	0	0	0.005	0	0	0	0	1	0	0.0061	0	0	0	0	0	0	0	0	0	0
NC_000913.3	2053992	shiA	NP_416488.1	T	A	57.1	PASS	SN=0;STA=2053991;STO=2053992;TYP=SUB;R1P=133;R1M=127;R2P=149;R2M=175;AD=584;DP=8661;MCOV=-41;PPC=580;AF=0.0674;RAF=0.0000;LS=61042;MQS=35040;MQM=60;BQS=21086;BQM=39;EDS=17545;EDM=75;IDS=576888;IDM=992;CED=601;HMP=0;SB=0.9999;EFF=NON_SYNONYMOUS_CODING(MODERATE|MISSENSE|tTc/tAc|F117Y|438|shiA|protein_coding|CODING|NP_416488.1|1|1)	GT:DP:AD:AF:RAF:SB:SC:PF	0	0	0	0	0.0047	0.9953	0.977	1	0	0.0061	0	0	0	0	0	0	0	0	0	0
NC_000913.3	1214920	bluF	NP_415681.1	G	A	56.47	PASS	SN=0;STA=1214919;STO=1214920;TYP=SUB;R1P=706;R1M=709;R2P=654;R2M=714;AD=2783;DP=11814;MCOV=-41;PPC=2765;AF=0.2356;RAF=0.0000;LS=259704;MQS=166980;MQM=60;BQS=100550;BQM=39;EDS=76677;EDM=75;IDS=2748689;IDM=992;CED=601;HMP=0;SB=0.9999;EFF=NON_SYNONYMOUS_CODING(MODERATE|MISSENSE|Cgg/Tgg|R186W|403|bluF|protein_coding|CODING|NP_415681.1|1|1)	GT:DP:AD:AF:RAF:SB:SC:PF	0	0	0	0	0	0	0	0.0083	0	0.0061	0	0	0.0029	0	0	0.9853	1	0.9938	1	0.9972
NC_000913.3	3596142	livH	NP_417914.1	C	A	54.98	PASS	SN=0;STA=3596141;STO=3596142;TYP=SUB;R1P=47;R1M=49;R2P=52;R2M=30;AD=178;DP=7211;MCOV=-41;PPC=176;AF=0.0247;RAF=0.0000;LS=16147;MQS=10673;MQM=60;BQS=6314;BQM=38;EDS=4913;EDM=67;IDS=175310;IDM=989;CED=601;HMP=0;SB=0.9996;EFF=NON_SYNONYMOUS_CODING(MODERATE|MISSENSE|Ggc/Tgc|G88C|308|livH|protein_coding|CODING|NP_417914.1|1|1)	GT:DP:AD:AF:RAF:SB:SC:PF	1	0.0054	0.0065	0	0	0	0	0.0078	0	0.0061	0.0137	0	0.0066	0.0054	0.0069	0	0.0055	0	0	0.0058
NC_000913.3	1922108	0	0	C	A	55.66	PASS	SN=0;STA=1922107;STO=1922108;TYP=SUB;R1P=68;R1M=66;R2P=86;R2M=60;AD=280;DP=10047;MCOV=-41;PPC=277;AF=0.0279;RAF=0.0000;LS=25576;MQS=16800;MQM=60;BQS=10078;BQM=38;EDS=7530;EDM=50;IDS=276354;IDM=992;CED=601;HMP=1;SB=0.9996;EFF=INTERGENIC(MODIFIER||||||||||1)	GT:DP:AD:AF:RAF:SB:SC:PF	0.0036	0	0.0036	0	0.0042	0.0075	0	0.0072	0	0.0061	0	0	0	0	0	0	0	0.9963	0.0035	0
NC_000913.3	4283605	actP	NP_418491.1	C	A	55.79	PASS	SN=0;STA=4283604;STO=4283605;TYP=SUB;R1P=48;R1M=76;R2P=52;R2M=70;AD=246;DP=8629;MCOV=-41;PPC=243;AF=0.0285;RAF=0.0000;LS=22493;MQS=14748;MQM=60;BQS=8644;BQM=38;EDS=6939;EDM=72;IDS=242249;IDM=992;CED=601;HMP=0;SB=0.9994;EFF=NON_SYNONYMOUS_CODING(MODERATE|MISSENSE|gGg/gTg|G433V|549|actP|protein_coding|CODING|NP_418491.1|1|1)	GT:DP:AD:AF:RAF:SB:SC:PF	0	0	0.0053	0	0.9913	0	0	0.007	0.0047	0.0061	0	0	0.0042	0.0045	0	0.0068	0.0042	0	0	0.0047
NC_000913.3	1678039	0	0	G	A	56.11	PASS	SN=0;STA=1678038;STO=1678039;TYP=SUB;R1P=87;R1M=75;R2P=82;R2M=55;AD=299;DP=11391;MCOV=-41;PPC=297;AF=0.0262;RAF=0.0000;LS=27259;MQS=17940;MQM=60;BQS=10783;BQM=38;EDS=8346;EDM=52;IDS=294931;IDM=992;CED=601;HMP=0;SB=0.9995;EFF=INTERGENIC(MODIFIER||||||||||1)	GT:DP:AD:AF:RAF:SB:SC:PF	0	0	0	0	0	0	0	0.006	0	0.0061	0	0.0032	0	0	0	0	0.0035	0	0.9931	0.007
NC_000913.3	1592069	hipA	NP_416024.1	A	G	56.69	PASS	SN=0;STA=1592068;STO=1592069;TYP=SUB;R1P=68;R1M=44;R2P=62;R2M=70;AD=244;DP=12261;MCOV=-41;PPC=244;AF=0.0199;RAF=0.0000;LS=22270;MQS=14640;MQM=60;BQS=8830;BQM=38;EDS=7365;EDM=74;IDS=240976;IDM=992;CED=601;HMP=0;SB=0.9998;EFF=SYNONYMOUS_CODING(LOW|SILENT|cgT/cgC|R36|440|hipA|protein_coding|CODING|NP_416024.1|1|1)	GT:DP:AD:AF:RAF:SB:SC:PF	0	0	0	0	0	0	0	0.0053	0.0039	0.0061	0	0	0	0	0	0	0	0	0	0
NC_000913.3	2554560	eutR	NP_416932.1	A	G	55.17	PASS	SN=0;STA=2554559;STO=2554560;TYP=SUB;R1P=48;R1M=48;R2P=46;R2M=44;AD=186;DP=7489;MCOV=-41;PPC=184;AF=0.0248;RAF=0.0062;LS=16916;MQS=11160;MQM=60;BQS=6721;BQM=38;EDS=4831;EDM=50;IDS=183475;IDM=989;CED=601;HMP=0;SB=1.0000;EFF=NON_SYNONYMOUS_CODING(MODERATE|MISSENSE|gTg/gCg|V208A|350|eutR|protein_coding|CODING|NP_416932.1|1|1)	GT:DP:AD:AF:RAF:SB:SC:PF	0	0	0	0	0	0.0059	0	0	0	0.0061	0	0	0	0	0	0	0	1	0	0
NC_000913.3	3756036	aldB	NP_418045.4	T	C	54.93	PASS	SN=0;STA=3756035;STO=3756036;TYP=SUB;R1P=43;R1M=38;R2P=65;R2M=36;AD=182;DP=8083;MCOV=-41;PPC=182;AF=0.0225;RAF=0.0051;LS=16591;MQS=10920;MQM=60;BQS=6417;BQM=38;EDS=4820;EDM=49;IDS=179587;IDM=989;CED=601;HMP=1;SB=0.9994;EFF=NON_SYNONYMOUS_CODING(MODERATE|MISSENSE|gAa/gGa|E159G|512|aldB|protein_coding|CODING|NP_418045.4|1|1)	GT:DP:AD:AF:RAF:SB:SC:PF	0	0	0	0	0.0052	0	0	0	0	0.0061	0	0	0	0	0	0	0	0	0	0
NC_000913.3	3818578	dinD	NP_418102.2	G	T	55.62	PASS	SN=0;STA=3818577;STO=3818578;TYP=SUB;R1P=60;R1M=74;R2P=75;R2M=73;AD=282;DP=10699;MCOV=-41;PPC=282;AF=0.0264;RAF=0.0036;LS=25684;MQS=16920;MQM=60;BQS=10033;BQM=38;EDS=7339;EDM=58;IDS=278324;IDM=989;CED=601;HMP=0;SB=0.9998;EFF=NON_SYNONYMOUS_CODING(MODERATE|MISSENSE|aaG/aaT|K273N|274|dinD|protein_coding|CODING|NP_418102.2|1|1)	GT:DP:AD:AF:RAF:SB:SC:PF	0.0036	0	0.0037	0	0.0072	0	0	0	0	0.0061	0	0	0	0.0037	0	0.0055	0.004	0.0038	0	0
NC_000913.3	1647123	ydfJ	b4600	T	C	57.89	PASS	SN=0;STA=1647122;STO=1647123;TYP=SUB;R1P=270;R1M=384;R2P=289;R2M=391;AD=1334;DP=13711;MCOV=-41;PPC=1325;AF=0.0973;RAF=0.0000;LS=129241;MQS=80010;MQM=60;BQS=49169;BQM=40;EDS=37806;EDM=74;IDS=1317464;IDM=992;CED=601;HMP=0;SB=0.9994;EFF=INTRON(MODIFIER||||455|ydfJ|protein_coding|CODING|b4600|1|1)	GT:DP:AD:AF:RAF:SB:SC:PF	0.0015	0	0	0	0	0	0	0	0	0.0061	0	0.0033	0	0	0	1	0.9818	1	0.9935	0.9966
NC_000913.3	2128651	wcaF	NP_416558.1	C	T	58.18	PASS	SN=0;STA=2128650;STO=2128651;TYP=SUB;R1P=256;R1M=638;R2P=675;R2M=579;AD=2148;DP=9409;MCOV=-41;PPC=2139;AF=0.2283;RAF=0.0000;LS=204223;MQS=128880;MQM=60;BQS=78742;BQM=39;EDS=62133;EDM=75;IDS=2121775;IDM=992;CED=601;HMP=0;SB=0.9995;EFF=NON_SYNONYMOUS_CODING(MODERATE|MISSENSE|Gtc/Atc|V80I|182|wcaF|protein_coding|CODING|NP_416558.1|1|1)	GT:DP:AD:AF:RAF:SB:SC:PF	0	0	0	0	0	0	0	0	0.004	0.0061	0	0	0	0	0	1	0.9924	1	1	1
NC_000913.3	479431	maa	NP_414992.1	G	A	58.66	PASS	SN=0;STA=479430;STO=479431;TYP=SUB;R1P=574;R1M=423;R2P=628;R2M=375;AD=2000;DP=10679;MCOV=-41;PPC=1986;AF=0.1873;RAF=0.0000;LS=190035;MQS=120000;MQM=60;BQS=73481;BQM=39;EDS=60585;EDM=75;IDS=1975434;IDM=992;CED=601;HMP=0;SB=0.9993;EFF=NON_SYNONYMOUS_CODING(MODERATE|MISSENSE|aCa/aTa|T163I|183|maa|protein_coding|CODING|NP_414992.1|1|1)	GT:DP:AD:AF:RAF:SB:SC:PF	0	0	0.0034	0	0	0	0.0038	0	0	0.0061	0	0	0.0033	0	0.0038	0.994	1	1	1	0.9927
NC_000913.3	1309261	kch	NP_415766.1	T	A	56.53	PASS	SN=0;STA=1309260;STO=1309261;TYP=SUB;R1P=77;R1M=65;R2P=74;R2M=68;AD=284;DP=10887;MCOV=-41;PPC=284;AF=0.0261;RAF=0.0000;LS=25866;MQS=17040;MQM=60;BQS=10296;BQM=38;EDS=8061;EDM=50;IDS=280306;IDM=989;CED=601;HMP=0;SB=0.9998;EFF=NON_SYNONYMOUS_CODING(MODERATE|MISSENSE|Agt/Tgt|S337C|417|kch|protein_coding|CODING|NP_415766.1|1|1|WARNING_TRANSCRIPT_NO_START_CODON)	GT:DP:AD:AF:RAF:SB:SC:PF	0	0	0	0	0	0	0	0	0	0.0061	0.0035	0	0	0.0036	0	0.0072	0	0	0	0.0034
NC_000913.3	926784	aat	NP_415405.1	C	G	56.28	PASS	SN=0;STA=926783;STO=926784;TYP=SUB;R1P=188;R1M=230;R2P=176;R2M=200;AD=794;DP=10192;MCOV=-41;PPC=787;AF=0.0779;RAF=0.0000;LS=72242;MQS=47640;MQM=60;BQS=29041;BQM=38;EDS=21018;EDM=50;IDS=783963;IDM=989;CED=601;HMP=1;SB=0.9997;EFF=NON_SYNONYMOUS_CODING(MODERATE|MISSENSE|Gga/Cga|G217R|234|aat|protein_coding|CODING|NP_415405.1|1|1)	GT:DP:AD:AF:RAF:SB:SC:PF	0.9929	0	1	1	0	0.0081	0.0076	0	0	0.0061	0.0034	0	0	0	0	0.007	0	0	0	0
NC_000913.3	269832	perR	NP_414788.1	T	C	56.28	PASS	SN=0;STA=269831;STO=269832;TYP=SUB;R1P=71;R1M=54;R2P=60;R2M=68;AD=253;DP=11016;MCOV=-41;PPC=253;AF=0.0230;RAF=0.0000;LS=23055;MQS=15180;MQM=60;BQS=9142;BQM=38;EDS=7156;EDM=72;IDS=249811;IDM=989;CED=601;HMP=0;SB=0.9999;EFF=NON_SYNONYMOUS_CODING(MODERATE|MISSENSE|atA/atG|I117M|297|perR|protein_coding|CODING|NP_414788.1|1|1)	GT:DP:AD:AF:RAF:SB:SC:PF	0	0	0	0	0	0	0	0	0	0.0061	0	0	0	0	0	0	0.0038	0	0	0
NC_000913.3	312735	ykgM	NP_414830.1	G	A	57.1	PASS	SN=0;STA=312734;STO=312735;TYP=SUB;R1P=100;R1M=121;R2P=99;R2M=102;AD=422;DP=14446;MCOV=-41;PPC=420;AF=0.0292;RAF=0.0000;LS=38370;MQS=25320;MQM=60;BQS=15626;BQM=38;EDS=12411;EDM=50;IDS=416777;IDM=992;CED=601;HMP=0;SB=0.9998;EFF=NON_SYNONYMOUS_CODING(MODERATE|MISSENSE|Cac/Tac|H15Y|87|ykgM|protein_coding|CODING|NP_414830.1|1|1)	GT:DP:AD:AF:RAF:SB:SC:PF	0.0022	0	0	0	0	0	0.0048	0	0.0023	0.0061	0.0024	0	0	0.0027	0	0	1	0	0	0.0024
NC_000913.3	743249	ybgI	NP_415238.1	G	A	55.47	PASS	SN=0;STA=743248;STO=743249;TYP=SUB;R1P=38;R1M=49;R2P=27;R2M=52;AD=166;DP=6751;MCOV=-41;PPC=163;AF=0.0246;RAF=0.0000;LS=15082;MQS=9957;MQM=60;BQS=6056;BQM=38;EDS=4670;EDM=50;IDS=163790;IDM=989;CED=601;HMP=1;SB=0.9993;EFF=SYNONYMOUS_CODING(LOW|SILENT|gaG/gaA|E141|247|ybgI|protein_coding|CODING|NP_415238.1|1|1)	GT:DP:AD:AF:RAF:SB:SC:PF	0	0	0	0	0	0	0	0	0	0.0061	0	0	0	0	0	0	0.0058	1	0	0
NC_000913.3	1921961	yebV	NP_416350.4	T	C	50.03	PASS	SN=0;STA=1921960;STO=1921961;TYP=SUB;R1P=650;R1M=540;R2P=625;R2M=559;AD=2374;DP=9807;MCOV=-41;PPC=2364;AF=0.2421;RAF=0.0000;LS=215839;MQS=142341;MQM=60;BQS=86711;BQM=38;EDS=65193;EDM=50;IDS=2343998;IDM=989;CED=601;HMP=2;SB=0.9997;EFF=NON_SYNONYMOUS_CODING(MODERATE|MISSENSE|cTt/cCt|L61P|78|yebV|protein_coding|CODING|NP_416350.4|1|1)	GT:DP:AD:AF:RAF:SB:SC:PF	0	0.0041	0	0	0	0	0	0	0	0.0061	0.9965	0.9959	0.9959	1	0.9962	0	0	0	0.004	0
NC_000913.3	3381196	degQ	NP_417701.1	A	G	55.1	PASS	SN=0;STA=3381195;STO=3381196;TYP=SUB;R1P=41;R1M=50;R2P=36;R2M=58;AD=185;DP=8770;MCOV=-41;PPC=185;AF=0.0211;RAF=0.0000;LS=16819;MQS=11100;MQM=60;BQS=6671;BQM=38;EDS=4903;EDM=73;IDS=182542;IDM=992;CED=601;HMP=0;SB=0.9994;EFF=NON_SYNONYMOUS_CODING(MODERATE|MISSENSE|Acg/Gcg|T152A|455|degQ|protein_coding|CODING|NP_417701.1|1|1)	GT:DP:AD:AF:RAF:SB:SC:PF	0	0	0	0	0	0	0	0	0	0.0061	0	0.004	0	0	0	0	0	0	0	0
NC_000913.3	4453312	ytfT	NP_418651.3	A	T	45.14	PASS	SN=0;STA=4453311;STO=4453312;TYP=SUB;R1P=42;R1M=28;R2P=44;R2M=40;AD=154;DP=6973;MCOV=-41;PPC=154;AF=0.0221;RAF=0.0000;LS=13983;MQS=9240;MQM=60;BQS=5527;BQM=38;EDS=3881;EDM=50;IDS=152066;IDM=989;CED=601;HMP=4;SB=0.9996;EFF=NON_SYNONYMOUS_CODING(MODERATE|MISSENSE|Att/Ttt|I248F|341|ytfT|protein_coding|CODING|NP_418651.3|1|1|WARNING_TRANSCRIPT_NO_START_CODON)	GT:DP:AD:AF:RAF:SB:SC:PF	0	1	0	0	0	0	0	0	0	0.0061	0	0	0	0	0	0	0	0	0	0
NC_000913.3	1800816	thrS	NP_416234.1	G	T	47.61	PASS	SN=0;STA=1800815;STO=1800816;TYP=SUB;R1P=69;R1M=62;R2P=51;R2M=86;AD=268;DP=10259;MCOV=-41;PPC=263;AF=0.0261;RAF=0.0000;LS=24523;MQS=16074;MQM=60;BQS=9735;BQM=38;EDS=7293;EDM=51;IDS=264167;IDM=989;CED=601;HMP=3;SB=0.9996;EFF=NON_SYNONYMOUS_CODING(MODERATE|MISSENSE|caC/caA|H585Q|642|thrS|protein_coding|CODING|NP_416234.1|1|1)	GT:DP:AD:AF:RAF:SB:SC:PF	0	0	0	0.0085	0	0	0.0036	0.0068	0	0.006	0	0	0	1	0	0.0069	0	0.004	0	0.0036
NC_000913.3	906980	ybjT	NP_415390.4	G	T	55.18	PASS	SN=0;STA=906979;STO=906980;TYP=SUB;R1P=50;R1M=55;R2P=41;R2M=63;AD=209;DP=7883;MCOV=-41;PPC=206;AF=0.0265;RAF=0.0000;LS=19074;MQS=12540;MQM=60;BQS=7514;BQM=38;EDS=5523;EDM=50;IDS=206252;IDM=992;CED=601;HMP=0;SB=0.9995;EFF=NON_SYNONYMOUS_CODING(MODERATE|MISSENSE|Cgc/Agc|R435S|476|ybjT|protein_coding|CODING|NP_415390.4|1|1|WARNING_TRANSCRIPT_NO_START_CODON)	GT:DP:AD:AF:RAF:SB:SC:PF	0.0055	0.006	0.0105	0	0	0.0106	0.0051	0.0059	0.0057	0.006	0.0055	0.0053	0	0	0.9949	0	0	0.0064	0	0
NC_000913.3	792216	0	0	CT	C	43.4	PASS	SN=0;STA=792216;STO=792217;TYP=DEL;R1P=50;R1M=39;R2P=52;R2M=34;AD=175;DP=10019;MCOV=-41;PPC=175;AF=0.0175;RAF=0.0043;LS=24475;MQS=10500;MQM=60;BQS=6577;BQM=39;EDS=6691;EDM=75;IDS=173454;IDM=992;CED=601;HMP=6;SB=0.9994;EFF=INTERGENIC(MODIFIER||||||||||1)	GT:DP:AD:AF:RAF:SB:SC:PF	0	0	0	0	0	0	0	0	0	0.006	0	0	0	0	0	0.9884	0	0	0	0
NC_000913.3	1002856	elfG	NP_415461.1	G	A	54.92	PASS	SN=0;STA=1002855;STO=1002856;TYP=SUB;R1P=54;R1M=62;R2P=50;R2M=72;AD=238;DP=9560;MCOV=-41;PPC=236;AF=0.0249;RAF=0.0043;LS=21682;MQS=14280;MQM=60;BQS=8384;BQM=39;EDS=6268;EDM=50;IDS=234819;IDM=992;CED=601;HMP=0;SB=0.9996;EFF=SYNONYMOUS_CODING(LOW|SILENT|acG/acA|T350|356|elfG|protein_coding|CODING|NP_415461.1|1|1)	GT:DP:AD:AF:RAF:SB:SC:PF	0	0	0	0	0	0	0	0	1	0.006	0	0	0	0	0	0	0	0	0	0
NC_000913.3	2531497	cysZ	NP_416908.1	G	T	45.55	PASS	SN=0;STA=2531496;STO=2531497;TYP=SUB;R1P=59;R1M=83;R2P=45;R2M=86;AD=273;DP=9407;MCOV=-41;PPC=271;AF=0.0290;RAF=0.0035;LS=24850;MQS=16379;MQM=60;BQS=9967;BQM=38;EDS=7441;EDM=50;IDS=266629;IDM=992;CED=601;HMP=4;SB=0.9992;EFF=NON_SYNONYMOUS_CODING(MODERATE|MISSENSE|gGt/gTt|G12V|253|cysZ|protein_coding|CODING|NP_416908.1|1|1)	GT:DP:AD:AF:RAF:SB:SC:PF	0	0	0	0	0	0	0.9963	0	0	0.006	0	0	0.0044	0	0	0	0	0	0	0
NC_000913.3	169029	fhuA	NP_414692.1	A	G	55.81	PASS	SN=0;STA=169028;STO=169029;TYP=SUB;R1P=62;R1M=80;R2P=56;R2M=63;AD=261;DP=10354;MCOV=-41;PPC=258;AF=0.0252;RAF=0.0032;LS=23731;MQS=15649;MQM=60;BQS=9449;BQM=38;EDS=7030;EDM=50;IDS=257566;IDM=992;CED=601;HMP=0;SB=0.9997;EFF=NON_SYNONYMOUS_CODING(MODERATE|MISSENSE|Aac/Gac|N516D|747|fhuA|protein_coding|CODING|NP_414692.1|1|1)	GT:DP:AD:AF:RAF:SB:SC:PF	0	0	0.0038	0	0.0038	0	0.9883	0	0	0.006	0	0	0	0	0	0	0	0.0039	0.0039	0
NC_000913.3	3269272	yhaC	NP_417591.1	T	A	50.14	PASS	SN=0;STA=3269271;STO=3269272;TYP=SUB;R1P=135;R1M=177;R2P=129;R2M=201;AD=642;DP=18320;MCOV=-41;PPC=638;AF=0.0350;RAF=0.0026;LS=58415;MQS=38520;MQM=60;BQS=23566;BQM=38;EDS=17504;EDM=72;IDS=633803;IDM=989;CED=601;HMP=2;SB=0.9994;EFF=NON_SYNONYMOUS_CODING(MODERATE|MISSENSE|aaT/aaA|N286K|395|yhaC|protein_coding|CODING|NP_417591.1|1|1)	GT:DP:AD:AF:RAF:SB:SC:PF	0	0	0.9984	0	0	0.0018	0	0	0	0.006	0	0	0	0.0019	0	0	0	0	0	0
NC_000913.3	2491673	oxc	NP_416874.1	G	A	57.72	PASS	SN=0;STA=2491672;STO=2491673;TYP=SUB;R1P=562;R1M=425;R2P=574;R2M=432;AD=1993;DP=9261;MCOV=-41;PPC=1978;AF=0.2152;RAF=0.0000;LS=188182;MQS=119558;MQM=60;BQS=73322;BQM=39;EDS=55658;EDM=74;IDS=1968750;IDM=992;CED=601;HMP=0;SB=0.9995;EFF=NON_SYNONYMOUS_CODING(MODERATE|MISSENSE|aCg/aTg|T93M|564|oxc|protein_coding|CODING|NP_416874.1|1|1)	GT:DP:AD:AF:RAF:SB:SC:PF	0	0	0.0042	0	0	0	0.0039	0	0	0.006	0	0	0	0	0	1	0.9954	0.9961	1	1
NC_000913.3	3913639	glmS	NP_418185.1	T	C	55.44	PASS	SN=0;STA=3913638;STO=3913639;TYP=SUB;R1P=47;R1M=49;R2P=58;R2M=48;AD=202;DP=8564;MCOV=-41;PPC=201;AF=0.0236;RAF=0.0000;LS=18476;MQS=12120;MQM=60;BQS=7306;BQM=38;EDS=5556;EDM=68;IDS=199167;IDM=989;CED=601;HMP=0;SB=0.9998;EFF=SYNONYMOUS_CODING(LOW|SILENT|caA/caG|Q10|609|glmS|protein_coding|CODING|NP_418185.1|1|1)	GT:DP:AD:AF:RAF:SB:SC:PF	0	0	0	0	0	0	0	0	0	0.006	0	0	0	0	0	0.0129	0	0.0051	0	0
NC_000913.3	349862	0	0	A	G	53.21	PASS	SN=0;STA=349861;STO=349862;TYP=SUB;R1P=35;R1M=43;R2P=31;R2M=40;AD=149;DP=6162;MCOV=-41;PPC=147;AF=0.0242;RAF=0.0000;LS=13659;MQS=3642;MQM=60;BQS=5363;BQM=38;EDS=3509;EDM=57;IDS=147094;IDM=992;CED=601;HMP=1;SB=0.9996;EFF=INTERGENIC(MODIFIER||||||||||1)	GT:DP:AD:AF:RAF:SB:SC:PF	1	0	0	0	0	0	0	0	0	0.006	0	0	0	0	0	0.0075	0	0	0	0
NC_000913.3	158898	pcnB	NP_414685.4	T	G	55.56	PASS	SN=0;STA=158897;STO=158898;TYP=SUB;R1P=249;R1M=188;R2P=226;R2M=198;AD=861;DP=7724;MCOV=-41;PPC=854;AF=0.1115;RAF=0.0000;LS=78220;MQS=51660;MQM=60;BQS=31720;BQM=38;EDS=22759;EDM=69;IDS=850276;IDM=989;CED=601;HMP=0;SB=0.9996;EFF=NON_SYNONYMOUS_CODING(MODERATE|MISSENSE|Aag/Cag|K77Q|465|pcnB|protein_coding|CODING|NP_414685.4|1|1|WARNING_TRANSCRIPT_NO_START_CODON)	GT:DP:AD:AF:RAF:SB:SC:PF	0	0	0.0068	0	0	0	0	0	0	0.006	1	1	1	0.9873	1	0	0	0	0	0
NC_000913.3	205859	dnaE	NP_414726.1	A	T	54.72	PASS	SN=0;STA=205858;STO=205859;TYP=SUB;R1P=56;R1M=26;R2P=52;R2M=51;AD=185;DP=8073;MCOV=-41;PPC=179;AF=0.0229;RAF=0.0000;LS=16881;MQS=11100;MQM=60;BQS=6617;BQM=38;EDS=5072;EDM=56;IDS=181145;IDM=989;CED=601;HMP=0;SB=0.9994;EFF=NON_SYNONYMOUS_CODING(MODERATE|MISSENSE|gAg/gTg|E245V|1160|dnaE|protein_coding|CODING|NP_414726.1|1|1)	GT:DP:AD:AF:RAF:SB:SC:PF	0	0	0	0	0	0	0	0	0	0.006	0	0	0	0	0	0	1	0	0	0
NC_000913.3	375356	0	0	T	A	55.66	PASS	SN=0;STA=375355;STO=375356;TYP=SUB;R1P=33;R1M=53;R2P=54;R2M=62;AD=202;DP=8319;MCOV=-41;PPC=201;AF=0.0243;RAF=0.0000;LS=18356;MQS=12111;MQM=60;BQS=7244;BQM=38;EDS=5719;EDM=50;IDS=199444;IDM=989;CED=601;HMP=0;SB=0.9995;EFF=INTERGENIC(MODIFIER||||||||||1)	GT:DP:AD:AF:RAF:SB:SC:PF	0.0056	0	0	0	0	0	0	0	0	0.006	0.0056	0	0	0	1	0	0	0	0	0
NC_000913.3	545862	allD	NP_415050.1	C	T	55.76	PASS	SN=0;STA=545861;STO=545862;TYP=SUB;R1P=139;R1M=126;R2P=105;R2M=130;AD=500;DP=7610;MCOV=-41;PPC=496;AF=0.0657;RAF=0.0000;LS=45225;MQS=29981;MQM=60;BQS=18020;BQM=38;EDS=13665;EDM=62;IDS=492956;IDM=989;CED=601;HMP=1;SB=0.9999;EFF=NON_SYNONYMOUS_CODING(MODERATE|MISSENSE|Gac/Aac|D168N|349|allD|protein_coding|CODING|NP_415050.1|1|1)	GT:DP:AD:AF:RAF:SB:SC:PF	0	0.005	0	0	0	0	0	0	0.0047	0.006	0.9939	0.994	0	0	1	0	0	0	0	0
NC_000913.3	566602	peaD	b4508	G	T	55.45	PASS	SN=0;STA=566601;STO=566602;TYP=SUB;R1P=46;R1M=62;R2P=56;R2M=77;AD=241;DP=9496;MCOV=-41;PPC=241;AF=0.0254;RAF=0.0000;LS=21979;MQS=14460;MQM=60;BQS=8563;BQM=38;EDS=6503;EDM=50;IDS=238157;IDM=989;CED=601;HMP=0;SB=0.9995;EFF=NON_SYNONYMOUS_CODING(MODERATE|MISSENSE|gGc/gTc|G76V|103|peaD|protein_coding|CODING|b4508|1|1|WARNING_TRANSCRIPT_NO_START_CODON)	GT:DP:AD:AF:RAF:SB:SC:PF	0.0037	0	0	0	0.0045	0	0	0	0	0.006	0	0	0.0041	0	0	0	0	0	0	0
NC_000913.3	1216053	0	0	A	C	56.73	PASS	SN=0;STA=1216052;STO=1216053;TYP=SUB;R1P=349;R1M=361;R2P=306;R2M=364;AD=1380;DP=15641;MCOV=-41;PPC=1378;AF=0.0882;RAF=0.0000;LS=125543;MQS=82797;MQM=60;BQS=49685;BQM=38;EDS=38829;EDM=50;IDS=1363595;IDM=989;CED=601;HMP=0;SB=0.9998;EFF=INTERGENIC(MODIFIER||||||||||1)	GT:DP:AD:AF:RAF:SB:SC:PF	0	0	0	0	0	0	0	0	0.0022	0.006	0	0	0.0038	0	0	0	0.0024	0	0	0
NC_000913.3	2232423	cdd	NP_416648.1	G	A	55.42	PASS	SN=0;STA=2232422;STO=2232423;TYP=SUB;R1P=47;R1M=51;R2P=48;R2M=53;AD=199;DP=8499;MCOV=-41;PPC=197;AF=0.0234;RAF=0.0000;LS=18090;MQS=11940;MQM=60;BQS=7286;BQM=38;EDS=5226;EDM=50;IDS=196284;IDM=992;CED=601;HMP=0;SB=0.9998;EFF=NON_SYNONYMOUS_CODING(MODERATE|MISSENSE|Gca/Aca|A194T|294|cdd|protein_coding|CODING|NP_416648.1|1|1)	GT:DP:AD:AF:RAF:SB:SC:PF	0	0	0	0	0	0	0.9949	0	0	0.006	0	0	0	0	0	0	0	0	0	0
NC_000913.3	3036931	recJ	NP_417368.1	A	T	55.18	PASS	SN=0;STA=3036930;STO=3036931;TYP=SUB;R1P=42;R1M=38;R2P=30;R2M=47;AD=157;DP=7189;MCOV=-41;PPC=154;AF=0.0218;RAF=0.0000;LS=14246;MQS=9420;MQM=60;BQS=5614;BQM=38;EDS=4396;EDM=50;IDS=154829;IDM=989;CED=601;HMP=0;SB=0.9997;EFF=SYNONYMOUS_CODING(LOW|SILENT|ggT/ggA|G392|577|recJ|protein_coding|CODING|NP_417368.1|1|1|WARNING_TRANSCRIPT_NO_START_CODON)	GT:DP:AD:AF:RAF:SB:SC:PF	0	0	0	0	0	0	0	0	0	0.006	0.0074	0	0	0	0	0	0	0	1	0
NC_000913.3	3203717	bacA	NP_417529.1	G	C	55.97	PASS	SN=0;STA=3203716;STO=3203717;TYP=SUB;R1P=71;R1M=49;R2P=61;R2M=60;AD=241;DP=8642;MCOV=-41;PPC=235;AF=0.0279;RAF=0.0000;LS=21934;MQS=14460;MQM=60;BQS=8787;BQM=38;EDS=6724;EDM=72;IDS=237843;IDM=989;CED=601;HMP=0;SB=0.9997;EFF=NON_SYNONYMOUS_CODING(MODERATE|MISSENSE|Ctg/Gtg|L139V|273|bacA|protein_coding|CODING|NP_417529.1|1|1)	GT:DP:AD:AF:RAF:SB:SC:PF	0	0	0	0	0	0.0055	0	0	0	0.006	0	0	0	0	0	0	0.9917	0	0	0
NC_000913.3	3286021	agaD	NP_417609.1	A	T	55.28	PASS	SN=0;STA=3286020;STO=3286021;TYP=SUB;R1P=57;R1M=62;R2P=54;R2M=62;AD=235;DP=8420;MCOV=-41;PPC=229;AF=0.0279;RAF=0.0000;LS=21379;MQS=14094;MQM=60;BQS=8525;BQM=38;EDS=6039;EDM=50;IDS=231660;IDM=992;CED=601;HMP=1;SB=0.9998;EFF=NON_SYNONYMOUS_CODING(MODERATE|MISSENSE|Atc/Ttc|I182F|263|agaD|protein_coding|CODING|NP_417609.1|1|1)	GT:DP:AD:AF:RAF:SB:SC:PF	0	0	0.005	0	1	0	0	0	0	0.006	0	0	0	0	0	0	0	0	0	0
NC_000913.3	3447268	rplE	NP_417767.1	C	T	55.84	PASS	SN=0;STA=3447267;STO=3447268;TYP=SUB;R1P=70;R1M=62;R2P=97;R2M=52;AD=281;DP=9497;MCOV=-41;PPC=279;AF=0.0296;RAF=0.0000;LS=25609;MQS=16857;MQM=60;BQS=10075;BQM=38;EDS=7826;EDM=70;IDS=277332;IDM=989;CED=601;HMP=0;SB=0.9994;EFF=SYNONYMOUS_CODING(LOW|SILENT|ctG/ctA|L57|179|rplE|protein_coding|CODING|NP_417767.1|1|1)	GT:DP:AD:AF:RAF:SB:SC:PF	0	0	0.9964	0	0	0	0	0	0	0.006	0.0039	0	0	0	0	0	0	0	0	0
NC_000913.3	4207732	0	0	C	A	49.22	PASS	SN=0;STA=4207731;STO=4207732;TYP=SUB;R1P=557;R1M=481;R2P=570;R2M=442;AD=2050;DP=12222;MCOV=-41;PPC=2043;AF=0.1677;RAF=0.0000;LS=203137;MQS=123000;MQM=60;BQS=74867;BQM=39;EDS=60062;EDM=75;IDS=2025687;IDM=992;CED=601;HMP=3;SB=0.9996;EFF=INTERGENIC(MODIFIER||||||||||1)	GT:DP:AD:AF:RAF:SB:SC:PF	0	0	0.0029	0	0.0055	0.9966	0.9942	1	0.0029	0.0059	0	0	0	0.0063	0	0.006	0	0	0.0032	0
NC_000913.3	509807	copA	NP_415017.1	T	C	55.56	PASS	SN=0;STA=509806;STO=509807;TYP=SUB;R1P=440;R1M=376;R2P=411;R2M=346;AD=1573;DP=6642;MCOV=-41;PPC=1559;AF=0.2368;RAF=0.0000;LS=142883;MQS=94340;MQM=60;BQS=57008;BQM=38;EDS=43647;EDM=50;IDS=1553085;IDM=992;CED=601;HMP=0;SB=0.9997;EFF=NON_SYNONYMOUS_CODING(MODERATE|MISSENSE|Acc/Gcc|T525A|834|copA|protein_coding|CODING|NP_415017.1|1|1)	GT:DP:AD:AF:RAF:SB:SC:PF	0	0	0	0	0	0	0	0.0077	0	0.0059	1	1	1	1	1	0	0	0	0	0
NC_000913.3	1237246	0	0	G	A	56.13	PASS	SN=0;STA=1237245;STO=1237246;TYP=SUB;R1P=562;R1M=562;R2P=563;R2M=472;AD=2159;DP=8908;MCOV=-41;PPC=2152;AF=0.2424;RAF=0.0000;LS=196310;MQS=129540;MQM=60;BQS=78928;BQM=38;EDS=57013;EDM=64;IDS=2130440;IDM=992;CED=601;HMP=0;SB=0.9998;EFF=INTERGENIC(MODIFIER||||||||||1)	GT:DP:AD:AF:RAF:SB:SC:PF	0.9907	1	0.9954	1	0.9953	0	0	0.0075	0	0.0059	0	0	0	0.0046	0	0	0.0045	0	0	0
NC_000913.3	4298176	fdhF	NP_418503.1	G	T	55.95	PASS	SN=0;STA=4298175;STO=4298176;TYP=SUB;R1P=62;R1M=60;R2P=49;R2M=58;AD=229;DP=8161;MCOV=-41;PPC=229;AF=0.0281;RAF=0.0000;LS=20891;MQS=13740;MQM=60;BQS=8161;BQM=39;EDS=6437;EDM=50;IDS=226278;IDM=992;CED=601;HMP=0;SB=0.9999;EFF=SYNONYMOUS_CODING(LOW|SILENT|gcC/gcA|A397|715|fdhF|protein_coding|CODING|NP_418503.1|1|1)	GT:DP:AD:AF:RAF:SB:SC:PF	0.0126	0	0	0	0.005	0	0	0.0068	0	0.0059	0	0.0047	0	0.005	0	0	0.0056	0	0.006	0.0047
NC_000913.3	2464185	0	0	A	G	35.08	PASS	SN=0;STA=2464184;STO=2464185;TYP=SUB;R1P=60;R1M=165;R2P=71;R2M=136;AD=432;DP=13384;MCOV=-41;PPC=430;AF=0.0323;RAF=0.0034;LS=39156;MQS=25909;MQM=60;BQS=15285;BQM=38;EDS=11868;EDM=50;IDS=426258;IDM=992;CED=601;HMP=0;SB=0.8202;EFF=INTERGENIC(MODIFIER||||||||||1)	GT:DP:AD:AF:RAF:SB:SC:PF	0	0	0.0024	0	0.0026	0	0.9861	0	0	0.0059	0	0	0.0022	0	0.0027	0	0	0	0	0
NC_000913.3	1020266	0	0	T	C	57.37	PASS	SN=0;STA=1020265;STO=1020266;TYP=SUB;R1P=599;R1M=530;R2P=565;R2M=490;AD=2184;DP=10390;MCOV=-41;PPC=2169;AF=0.2102;RAF=0.0000;LS=205906;MQS=131039;MQM=60;BQS=80226;BQM=39;EDS=59087;EDM=74;IDS=2157482;IDM=992;CED=601;HMP=0;SB=0.9998;EFF=INTERGENIC(MODIFIER||||||||||1)	GT:DP:AD:AF:RAF:SB:SC:PF	0	0	0.0034	0	0	0	0	0	0	0.0059	0	0	0.0034	0	0	1	0.993	1	1	1
NC_000913.3	3645105	prlC	NP_417955.1	C	G	58.25	PASS	SN=0;STA=3645104;STO=3645105;TYP=SUB;R1P=477;R1M=515;R2P=510;R2M=488;AD=1990;DP=8225;MCOV=-41;PPC=1983;AF=0.2419;RAF=0.0000;LS=188892;MQS=119400;MQM=60;BQS=72911;BQM=39;EDS=56846;EDM=75;IDS=1966189;IDM=992;CED=601;HMP=0;SB=1.0000;EFF=SYNONYMOUS_CODING(LOW|SILENT|gtG/gtC|V26|680|prlC|protein_coding|CODING|NP_417955.1|1|1)	GT:DP:AD:AF:RAF:SB:SC:PF	0	0	0	0	0	0	0	0	0	0.0059	0	0	0	0	0	1	0.9886	0.9951	1	0.9908
NC_000913.3	656646	pagP	NP_415155.1	G	T	56.83	PASS	SN=0;STA=656645;STO=656646;TYP=SUB;R1P=63;R1M=113;R2P=88;R2M=111;AD=375;DP=14598;MCOV=-41;PPC=375;AF=0.0257;RAF=0.0000;LS=34111;MQS=22500;MQM=60;BQS=13670;BQM=38;EDS=10528;EDM=50;IDS=370377;IDM=992;CED=601;HMP=0;SB=0.9993;EFF=NON_SYNONYMOUS_CODING(MODERATE|MISSENSE|tgG/tgT|W30C|186|pagP|protein_coding|CODING|NP_415155.1|1|1)	GT:DP:AD:AF:RAF:SB:SC:PF	0	0	0.0023	0.0022	0.0021	0.0022	0.0023	0	0	0.0059	0.0023	0	0	0.0026	0.0024	0	0.0028	0.0027	0	0
NC_000913.3	898465	ybjO	NP_415379.1	C	T	49.55	PASS	SN=0;STA=898464;STO=898465;TYP=SUB;R1P=54;R1M=43;R2P=76;R2M=73;AD=246;DP=8843;MCOV=-41;PPC=245;AF=0.0278;RAF=0.0000;LS=22350;MQS=14745;MQM=60;BQS=8813;BQM=38;EDS=6462;EDM=50;IDS=242644;IDM=989;CED=601;HMP=2;SB=0.9998;EFF=SYNONYMOUS_CODING(LOW|SILENT|ttC/ttT|F159|162|ybjO|protein_coding|CODING|NP_415379.1|1|1)	GT:DP:AD:AF:RAF:SB:SC:PF	0	0	0	0	0.0047	0	0	0	0	0.0059	0	0	0	0	0	0	0	0	0	0
NC_000913.3	1157138	ycfH	NP_415618.1	G	T	56.39	PASS	SN=0;STA=1157137;STO=1157138;TYP=SUB;R1P=126;R1M=122;R2P=127;R2M=116;AD=491;DP=9736;MCOV=-41;PPC=486;AF=0.0504;RAF=0.0000;LS=44664;MQS=29460;MQM=60;BQS=17899;BQM=38;EDS=14140;EDM=50;IDS=485040;IDM=989;CED=601;HMP=1;SB=0.9999;EFF=NON_SYNONYMOUS_CODING(MODERATE|MISSENSE|cGt/cTt|R121L|265|ycfH|protein_coding|CODING|NP_415618.1|1|1)	GT:DP:AD:AF:RAF:SB:SC:PF	0	0	0	0.0072	0.0042	0.0037	0	0	0	0.0059	0	0	1	1	0	0	0	0	0.0043	0
NC_000913.3	1803099	arpB	b4494	T	A	56.26	PASS	SN=0;STA=1803098;STO=1803099;TYP=SUB;R1P=101;R1M=94;R2P=87;R2M=91;AD=373;DP=14464;MCOV=-41;PPC=372;AF=0.0258;RAF=0.0000;LS=33965;MQS=22380;MQM=60;BQS=13644;BQM=39;EDS=9927;EDM=50;IDS=368312;IDM=992;CED=601;HMP=0;SB=1.0000;EFF=NON_SYNONYMOUS_CODING(MODERATE|MISSENSE|agT/agA|S2R|632|arpB|protein_coding|CODING|b4494|1|1|WARNING_TRANSCRIPT_INCOMPLETE)	GT:DP:AD:AF:RAF:SB:SC:PF	0	0	0.0023	0	0.0027	0.0024	0	0	0	0.0059	0	0	0	0	0	0	0.9973	0.0051	0	0
NC_000913.3	2138066	yegH	NP_416567.4	G	C	46.12	PASS	SN=0;STA=2138065;STO=2138066;TYP=SUB;R1P=42;R1M=72;R2P=31;R2M=66;AD=211;DP=8361;MCOV=-41;PPC=210;AF=0.0252;RAF=0.0000;LS=19206;MQS=12660;MQM=60;BQS=7701;BQM=38;EDS=5587;EDM=49;IDS=208216;IDM=989;CED=601;HMP=0;SB=0.9204;EFF=NON_SYNONYMOUS_CODING(MODERATE|MISSENSE|atG/atC|M55I|527|yegH|protein_coding|CODING|NP_416567.4|1|1)	GT:DP:AD:AF:RAF:SB:SC:PF	0	0	1	0	0	0	0	0	0	0.0059	0	0	0	0	0	0	0	0	0	0
NC_000913.3	3161342	ftsP	NP_417489.1	T	C	55.38	PASS	SN=0;STA=3161341;STO=3161342;TYP=SUB;R1P=42;R1M=45;R2P=55;R2M=48;AD=190;DP=7668;MCOV=-41;PPC=190;AF=0.0248;RAF=0.0000;LS=17296;MQS=11400;MQM=60;BQS=6911;BQM=38;EDS=4922;EDM=61;IDS=187585;IDM=992;CED=601;HMP=0;SB=0.9999;EFF=NON_SYNONYMOUS_CODING(MODERATE|MISSENSE|cAc/cGc|H443R|470|ftsP|protein_coding|CODING|NP_417489.1|1|1)	GT:DP:AD:AF:RAF:SB:SC:PF	0	0.0101	0	0	0	0	0	0	0	0.0059	0	0	0	0	0	0	0	0	0	0
NC_000913.3	3550545	malP	YP_026218.1	G	A	55.62	PASS	SN=0;STA=3550544;STO=3550545;TYP=SUB;R1P=82;R1M=44;R2P=75;R2M=59;AD=260;DP=9219;MCOV=-41;PPC=256;AF=0.0282;RAF=0.0000;LS=23707;MQS=15600;MQM=60;BQS=9406;BQM=38;EDS=6962;EDM=63;IDS=256600;IDM=992;CED=601;HMP=0;SB=0.9993;EFF=SYNONYMOUS_CODING(LOW|SILENT|ggC/ggT|G643|797|malP|protein_coding|CODING|YP_026218.1|1|1)	GT:DP:AD:AF:RAF:SB:SC:PF	0	0	0	0	0	0	0.0044	0	1	0.0059	0	0	0	0	0.0045	0	0	0	0	0
NC_000913.3	3872645	dgoD	YP_026237.1	A	G	54.89	PASS	SN=0;STA=3872644;STO=3872645;TYP=SUB;R1P=49;R1M=44;R2P=30;R2M=40;AD=163;DP=7927;MCOV=-41;PPC=160;AF=0.0206;RAF=0.0000;LS=14802;MQS=9780;MQM=60;BQS=5730;BQM=38;EDS=4341;EDM=50;IDS=160896;IDM=992;CED=601;HMP=0;SB=0.9999;EFF=SYNONYMOUS_CODING(LOW|SILENT|agT/agC|S118|382|dgoD|protein_coding|CODING|YP_026237.1|1|1)	GT:DP:AD:AF:RAF:SB:SC:PF	0	0	0	0.005	0	0.9873	0	0	0.0047	0.0059	0	0	0.0064	0.0052	0	0	0	0	0.0061	0
NC_000913.3	123319	aceE	NP_414656.1	C	G	57.91	PASS	SN=0;STA=123318;STO=123319;TYP=SUB;R1P=41;R1M=44;R2P=42;R2M=35;AD=162;DP=8845;MCOV=-41;PPC=161;AF=0.0183;RAF=0.0000;LS=22725;MQS=9720;MQM=60;BQS=5953;BQM=39;EDS=6628;EDM=75;IDS=160496;IDM=992;CED=601;HMP=0;SB=0.9999;EFF=NON_SYNONYMOUS_CODING(MODERATE|MISSENSE|gaC/gaG|D101E|887|aceE|protein_coding|CODING|NP_414656.1|1|1)	GT:DP:AD:AF:RAF:SB:SC:PF	0	0	0	0.0051	0	0	0	1	0	0.0058	0	0	0	0	0	0	0	0	0	0
NC_000913.3	2750014	yfjD	YP_026171.3	T	A	45.71	PASS	SN=0;STA=2750013;STO=2750014;TYP=SUB;R1P=66;R1M=69;R2P=59;R2M=63;AD=257;DP=9382;MCOV=-41;PPC=257;AF=0.0274;RAF=0.0000;LS=23486;MQS=15420;MQM=60;BQS=9258;BQM=38;EDS=6737;EDM=64;IDS=253643;IDM=992;CED=601;HMP=4;SB=0.9999;EFF=NON_SYNONYMOUS_CODING(MODERATE|MISSENSE|gTa/gAa|V414E|428|yfjD|protein_coding|CODING|YP_026171.3|1|1)	GT:DP:AD:AF:RAF:SB:SC:PF	0.0041	0	0	0	0	0	0	0.0054	0.0043	0.0058	0	0	0	0	0	0.0057	0	0.0045	0	0
NC_000913.3	3884861	yidD	YP_588472.1	A	T	50.74	PASS	SN=0;STA=3884860;STO=3884861;TYP=SUB;R1P=28;R1M=39;R2P=39;R2M=46;AD=152;DP=7387;MCOV=-41;PPC=152;AF=0.0206;RAF=0.0058;LS=21309;MQS=9120;MQM=60;BQS=5683;BQM=39;EDS=6370;EDM=74;IDS=150029;IDM=992;CED=601;HMP=2;SB=0.9996;EFF=NON_SYNONYMOUS_CODING(MODERATE|MISSENSE|Att/Ttt|I16F|85|yidD|protein_coding|CODING|YP_588472.1|1|1)	GT:DP:AD:AF:RAF:SB:SC:PF	0	0	0	0	0	0	0	0	0	0.0058	0	0	0	0	0	1	0	0	0	0
NC_000913.3	3259224	tdcG	YP_026204.1	G	T	55.39	PASS	SN=0;STA=3259223;STO=3259224;TYP=SUB;R1P=52;R1M=43;R2P=56;R2M=59;AD=210;DP=9056;MCOV=-41;PPC=210;AF=0.0232;RAF=0.0046;LS=19048;MQS=12600;MQM=60;BQS=7512;BQM=38;EDS=5555;EDM=50;IDS=207191;IDM=989;CED=601;HMP=0;SB=0.9999;EFF=SYNONYMOUS_CODING(LOW|SILENT|acC/acA|T142|454|tdcG|protein_coding|CODING|YP_026204.1|1|1)	GT:DP:AD:AF:RAF:SB:SC:PF	0	0	0	0	0.0092	0.0044	0	0	0.0039	0.0058	0	0.0037	0.0047	0.005	0	0	0	0	0	0.0054
NC_000913.3	2990343	yqeK	NP_417326.2	C	A	57.07	PASS	SN=0;STA=2990342;STO=2990343;TYP=SUB;R1P=789;R1M=738;R2P=746;R2M=707;AD=2980;DP=17143;MCOV=-41;PPC=2965;AF=0.1738;RAF=0.0032;LS=270797;MQS=178800;MQM=60;BQS=109636;BQM=38;EDS=81595;EDM=65;IDS=2943173;IDM=989;CED=601;HMP=0;SB=0.9999;EFF=SYNONYMOUS_CODING(LOW|SILENT|tcG/tcT|S6|141|yqeK|protein_coding|CODING|NP_417326.2|1|1)	GT:DP:AD:AF:RAF:SB:SC:PF	1	1	0.9983	0.9982	0.9968	0.0018	0.0054	0	0.002	0.0058	0	0	0.0066	0.0023	0.0018	0	0.0023	0	0	0.0021
NC_000913.3	3081129	tktA	YP_026188.1	C	A	58.16	PASS	SN=0;STA=3081128;STO=3081129;TYP=SUB;R1P=477;R1M=456;R2P=450;R2M=404;AD=1787;DP=8347;MCOV=-41;PPC=1775;AF=0.2141;RAF=0.0000;LS=169915;MQS=107147;MQM=60;BQS=65655;BQM=39;EDS=51551;EDM=74;IDS=1765416;IDM=992;CED=601;HMP=1;SB=0.9999;EFF=SYNONYMOUS_CODING(LOW|SILENT|ctG/ctT|L169|663|tktA|protein_coding|CODING|YP_026188.1|1|1)	GT:DP:AD:AF:RAF:SB:SC:PF	0	0	0	0	0	0	0	0	0	0.0058	0	0	0	0	0.0056	1	1	0.9946	0.99	1
NC_000913.3	736311	0	0	A	T	58.35	PASS	SN=0;STA=736310;STO=736311;TYP=SUB;R1P=578;R1M=475;R2P=579;R2M=481;AD=2113;DP=17531;MCOV=-41;PPC=2104;AF=0.1205;RAF=0.0000;LS=201039;MQS=126734;MQM=60;BQS=78456;BQM=40;EDS=61430;EDM=75;IDS=2087357;IDM=992;CED=601;HMP=1;SB=0.9997;EFF=INTERGENIC(MODIFIER||||||||||1)	GT:DP:AD:AF:RAF:SB:SC:PF	0	0	0	0	0	0.0019	0.0018	0	0.002	0.0058	0	0	0.0016	0	0.0018	0.9944	0.9934	1	1	0.9981
NC_000913.3	2022372	fliP	NP_416458.1	C	A	57.36	PASS	SN=0;STA=2022371;STO=2022372;TYP=SUB;R1P=202;R1M=261;R2P=202;R2M=250;AD=915;DP=7921;MCOV=-41;PPC=902;AF=0.1155;RAF=0.0000;LS=90861;MQS=54900;MQM=60;BQS=32713;BQM=39;EDS=27474;EDM=75;IDS=903666;IDM=992;CED=601;HMP=1;SB=0.9996;EFF=SYNONYMOUS_CODING(LOW|SILENT|cgC/cgA|R168|245|fliP|protein_coding|CODING|NP_416458.1|1|1)	GT:DP:AD:AF:RAF:SB:SC:PF	0	0	0.0056	0	0	0.0046	0	0	0	0.0058	0	0	0.0063	0	0	0.9935	0.9947	0.9945	1	1
NC_000913.3	1179218	nagK	NP_415637.1	C	A	55.68	PASS	SN=0;STA=1179217;STO=1179218;TYP=SUB;R1P=275;R1M=249;R2P=238;R2M=268;AD=1030;DP=8702;MCOV=-41;PPC=1024;AF=0.1184;RAF=0.0000;LS=93766;MQS=61800;MQM=60;BQS=37564;BQM=38;EDS=27554;EDM=72;IDS=1016834;IDM=989;CED=601;HMP=0;SB=1.0000;EFF=NON_SYNONYMOUS_CODING(MODERATE|MISSENSE|cCc/cAc|P209H|303|nagK|protein_coding|CODING|NP_415637.1|1|1)	GT:DP:AD:AF:RAF:SB:SC:PF	0	0.0045	0	0	0.0051	0	0.0052	0	0.005	0.0058	0.9942	1	0.9954	1	0.9857	0.0066	0.005	0.0054	0	0
NC_000913.3	3776629	0	0	A	G	40.76	PASS	SN=0;STA=3776628;STO=3776629;TYP=SUB;R1P=49;R1M=91;R2P=43;R2M=90;AD=273;DP=10483;MCOV=-41;PPC=269;AF=0.0260;RAF=0.0000;LS=24877;MQS=16380;MQM=60;BQS=9856;BQM=38;EDS=7629;EDM=72;IDS=263453;IDM=989;CED=601;HMP=4;SB=0.9204;EFF=INTERGENIC(MODIFIER||||||||||1)	GT:DP:AD:AF:RAF:SB:SC:PF	0	0.0039	0	0	0	0	0	0	0	0.0058	0	0	0.0034	0	0	0.0057	0.9963	0	0.0036	0
NC_000913.3	412077	araJ	NP_414930.3	C	T	55.75	PASS	SN=0;STA=412076;STO=412077;TYP=SUB;R1P=94;R1M=103;R2P=142;R2M=145;AD=484;DP=9372;MCOV=-41;PPC=477;AF=0.0516;RAF=0.0000;LS=44006;MQS=29025;MQM=60;BQS=17256;BQM=38;EDS=13468;EDM=50;IDS=477241;IDM=989;CED=601;HMP=1;SB=0.9999;EFF=SYNONYMOUS_CODING(LOW|SILENT|ggG/ggA|G135|394|araJ|protein_coding|CODING|NP_414930.3|1|1)	GT:DP:AD:AF:RAF:SB:SC:PF	0	0.9881	0	0.0045	0.9913	0	0	0	0	0.0058	0	0.0042	0	0.0045	0	0	0.0043	0	0	0
NC_000913.3	652686	citA	NP_415152.1	C	A	49.68	PASS	SN=0;STA=652685;STO=652686;TYP=SUB;R1P=68;R1M=74;R2P=46;R2M=83;AD=271;DP=9788;MCOV=-41;PPC=270;AF=0.0277;RAF=0.0000;LS=24645;MQS=16260;MQM=60;BQS=9895;BQM=38;EDS=7337;EDM=69;IDS=267523;IDM=989;CED=601;HMP=2;SB=0.9995;EFF=NON_SYNONYMOUS_CODING(MODERATE|MISSENSE|cCa/cAa|P151Q|552|citA|protein_coding|CODING|NP_415152.1|1|1)	GT:DP:AD:AF:RAF:SB:SC:PF	0.9962	0	0	0	0.0147	0.0072	0	0	0.0035	0.0058	0	0	0	0	0.0043	0	0	0	0	0
NC_000913.3	890910	0	0	C	T	55.66	PASS	SN=0;STA=890909;STO=890910;TYP=SUB;R1P=74;R1M=75;R2P=10;R2M=76;AD=235;DP=8785;MCOV=-41;PPC=233;AF=0.0268;RAF=0.0000;LS=21394;MQS=14100;MQM=60;BQS=8573;BQM=38;EDS=6507;EDM=50;IDS=231964;IDM=989;CED=601;HMP=0;SB=0.9991;EFF=INTERGENIC(MODIFIER||||||||||1)	GT:DP:AD:AF:RAF:SB:SC:PF	0	0	0	0	0.9957	0	0	0	0	0.0058	0.0037	0	0	0	0.0041	0	0	0	0	0
NC_000913.3	1176596	lolC	NP_415634.1	T	C	47.36	PASS	SN=0;STA=1176595;STO=1176596;TYP=SUB;R1P=57;R1M=63;R2P=32;R2M=67;AD=219;DP=8847;MCOV=-41;PPC=216;AF=0.0248;RAF=0.0000;LS=19979;MQS=13140;MQM=60;BQS=7952;BQM=38;EDS=5898;EDM=50;IDS=216241;IDM=992;CED=601;HMP=3;SB=0.9994;EFF=SYNONYMOUS_CODING(LOW|SILENT|acT/acC|T390|399|lolC|protein_coding|CODING|NP_415634.1|1|1)	GT:DP:AD:AF:RAF:SB:SC:PF	0	0	0	0.9954	0	0	0.0047	0	0	0.0058	0	0	0	0	0	0	0	0	0	0
NC_000913.3	1299340	0	0	T	C	28.07	PASS	SN=0;STA=1299339;STO=1299340;TYP=SUB;R1P=128;R1M=67;R2P=115;R2M=69;AD=379;DP=12854;MCOV=-41;PPC=138;AF=0.0295;RAF=0.0000;LS=34471;MQS=22740;MQM=60;BQS=13865;BQM=38;EDS=10312;EDM=50;IDS=374257;IDM=992;CED=601;HMP=0;SB=0.9991;EFF=INTERGENIC(MODIFIER||||||||||1)	GT:DP:AD:AF:RAF:SB:SC:PF	0	0	0	0	0	0	0.0025	0	0.0029	0.0058	0	0	0	0	0	0	0	0	0	0.9947
NC_000913.3	2135788	wzb	NP_416565.1	A	G	55.52	PASS	SN=0;STA=2135787;STO=2135788;TYP=SUB;R1P=39;R1M=36;R2P=34;R2M=55;AD=164;DP=8152;MCOV=-41;PPC=163;AF=0.0201;RAF=0.0000;LS=14974;MQS=9840;MQM=60;BQS=6034;BQM=38;EDS=4681;EDM=71;IDS=161684;IDM=989;CED=601;HMP=0;SB=0.9996;EFF=NON_SYNONYMOUS_CODING(MODERATE|MISSENSE|tTt/tCt|F104S|147|wzb|protein_coding|CODING|NP_416565.1|1|1)	GT:DP:AD:AF:RAF:SB:SC:PF	0	1	0	0	0	0	0	0	0	0.0058	0	0	0.0053	0	0	0	0	0	0	0
NC_000913.3	2305975	mqo	NP_416714.1	A	G	54.67	PASS	SN=0;STA=2305974;STO=2305975;TYP=SUB;R1P=49;R1M=54;R2P=43;R2M=20;AD=166;DP=7626;MCOV=-41;PPC=164;AF=0.0218;RAF=0.0000;LS=15035;MQS=9960;MQM=60;BQS=6000;BQM=38;EDS=4348;EDM=49;IDS=163745;IDM=992;CED=601;HMP=0;SB=0.9996;EFF=SYNONYMOUS_CODING(LOW|SILENT|cgT/cgC|R260|548|mqo|protein_coding|CODING|NP_416714.1|1|1)	GT:DP:AD:AF:RAF:SB:SC:PF	0	0	0	0.0046	0.9939	0	0	0	0	0.0058	0	0	0	0	0	0	0	0.0056	0	0
NC_000913.3	2984214	0	0	G	A	56.67	PASS	SN=0;STA=2984213;STO=2984214;TYP=SUB;R1P=55;R1M=69;R2P=55;R2M=83;AD=262;DP=11173;MCOV=-41;PPC=262;AF=0.0234;RAF=0.0000;LS=23854;MQS=15720;MQM=60;BQS=9522;BQM=38;EDS=7625;EDM=50;IDS=258405;IDM=989;CED=601;HMP=0;SB=0.9994;EFF=INTERGENIC(MODIFIER||||||||||1)	GT:DP:AD:AF:RAF:SB:SC:PF	0	0	0	0	0	0.0032	0.003	0	0	0.0058	0	0	0	0	0	0	0.0035	0	0	0.0034
NC_000913.3	3192437	yqiJ	NP_417522.1	GT	G	42.87	PASS	SN=0;STA=3192437;STO=3192438;TYP=DEL;R1P=93;R1M=93;R2P=103;R2M=127;AD=416;DP=12965;MCOV=-41;PPC=413;AF=0.0321;RAF=0.0000;LS=37848;MQS=24960;MQM=60;BQS=14991;BQM=39;EDS=11597;EDM=50;IDS=410711;IDM=992;CED=601;HMP=6;SB=0.9998;EFF=FRAME_SHIFT(HIGH||ggt/|G77|209|yqiJ|protein_coding|CODING|NP_417522.1|1|1);LOF=(yqiJ|b3050|1|1.00)	GT:DP:AD:AF:RAF:SB:SC:PF	0	0	0	0	0.9762	0	0	0	0	0.0058	0	0	0.0024	0.0024	0.0027	0	0	0.0027	0	0
NC_000913.3	3841081	nepI	NP_418118.2	G	A	55.91	PASS	SN=0;STA=3841080;STO=3841081;TYP=SUB;R1P=194;R1M=337;R2P=240;R2M=355;AD=1126;DP=8928;MCOV=-41;PPC=1118;AF=0.1261;RAF=0.0000;LS=102417;MQS=67560;MQM=60;BQS=40405;BQM=39;EDS=32114;EDM=50;IDS=1111387;IDM=992;CED=601;HMP=0;SB=0.9993;EFF=NON_SYNONYMOUS_CODING(MODERATE|MISSENSE|gCa/gTa|A220V|396|nepI|protein_coding|CODING|NP_418118.2|1|1)	GT:DP:AD:AF:RAF:SB:SC:PF	0	0	0	0	0	0	0	0	0.0048	0.0058	0.9953	1	0.9812	0.9907	0.9958	0	0	0	0	0
NC_000913.3	3998754	uvrD	NP_418258.1	G	C	54.46	PASS	SN=0;STA=3998753;STO=3998754;TYP=SUB;R1P=34;R1M=41;R2P=38;R2M=49;AD=162;DP=7481;MCOV=-41;PPC=161;AF=0.0217;RAF=0.0000;LS=14734;MQS=9683;MQM=60;BQS=5805;BQM=38;EDS=4356;EDM=49;IDS=158007;IDM=989;CED=601;HMP=1;SB=0.9996;EFF=NON_SYNONYMOUS_CODING(MODERATE|MISSENSE|Ggg/Cgg|G258R|720|uvrD|protein_coding|CODING|NP_418258.1|1|1)	GT:DP:AD:AF:RAF:SB:SC:PF	0	0	0	0	0	0	0.0055	0	0	0.0058	0	1	0.0059	0	0	0	0	0	0	0
NC_000913.3	4388989	mscM	NP_418583.1	G	T	55.37	PASS	SN=0;STA=4388988;STO=4388989;TYP=SUB;R1P=441;R1M=422;R2P=458;R2M=421;AD=1742;DP=6892;MCOV=-41;PPC=1732;AF=0.2528;RAF=0.0000;LS=158132;MQS=104510;MQM=60;BQS=63037;BQM=38;EDS=45356;EDM=50;IDS=1720092;IDM=989;CED=601;HMP=1;SB=0.9999;EFF=NON_SYNONYMOUS_CODING(MODERATE|MISSENSE|Cag/Aag|Q128K|1107|mscM|protein_coding|CODING|NP_418583.1|1|1|WARNING_TRANSCRIPT_NO_START_CODON)	GT:DP:AD:AF:RAF:SB:SC:PF	1	0.9943	0.9939	0.994	0.9931	0	0	0	0.0061	0.0058	0	0	0	0.0057	0	0	0.006	0	0	0
NC_000913.3	459379	lon	NP_414973.1	T	C	57.06	PASS	SN=0;STA=459378;STO=459379;TYP=SUB;R1P=170;R1M=131;R2P=173;R2M=139;AD=613;DP=9239;MCOV=-41;PPC=608;AF=0.0663;RAF=0.0000;LS=63010;MQS=36780;MQM=60;BQS=22364;BQM=39;EDS=17966;EDM=75;IDS=605638;IDM=992;CED=601;HMP=1;SB=0.9996;EFF=SYNONYMOUS_CODING(LOW|SILENT|cgT/cgC|R164|784|lon|protein_coding|CODING|NP_414973.1|1|1)	GT:DP:AD:AF:RAF:SB:SC:PF	0	0	0	0	0	1	0.9954	0.9932	0	0.0057	0	0	0	0	0	0	0	0	0	0
NC_000913.3	2281944	yejH	NP_416689.1	A	G	55.57	PASS	SN=0;STA=2281943;STO=2281944;TYP=SUB;R1P=49;R1M=63;R2P=60;R2M=58;AD=230;DP=8386;MCOV=-41;PPC=227;AF=0.0274;RAF=0.0000;LS=21142;MQS=13800;MQM=60;BQS=8119;BQM=38;EDS=6269;EDM=68;IDS=226891;IDM=989;CED=601;HMP=0;SB=0.9998;EFF=NON_SYNONYMOUS_CODING(MODERATE|MISSENSE|aAc/aGc|N438S|586|yejH|protein_coding|CODING|NP_416689.1|1|1)	GT:DP:AD:AF:RAF:SB:SC:PF	0	0	0.0048	0	0	1	0	0.0183	0	0.0057	0	0	0	0	0	0.007	0	0	0	0
NC_000913.3	2705397	lepA	NP_417064.1	C	T	49.22	PASS	SN=0;STA=2705396;STO=2705397;TYP=SUB;R1P=61;R1M=55;R2P=19;R2M=73;AD=208;DP=8796;MCOV=-41;PPC=205;AF=0.0236;RAF=0.0000;LS=18925;MQS=12480;MQM=60;BQS=7532;BQM=38;EDS=5452;EDM=50;IDS=204258;IDM=989;CED=601;HMP=2;SB=0.9993;EFF=SYNONYMOUS_CODING(LOW|SILENT|aaG/aaA|K576|599|lepA|protein_coding|CODING|NP_417064.1|1|1)	GT:DP:AD:AF:RAF:SB:SC:PF	0	0	0	0	0	0.0043	0	0.006	0	0.0057	0	0	0	0	0	0	0	1	0	0
NC_000913.3	3473592	rpsG	NP_417800.1	G	T	56.31	PASS	SN=0;STA=3473591;STO=3473592;TYP=SUB;R1P=127;R1M=107;R2P=131;R2M=103;AD=468;DP=9421;MCOV=-41;PPC=468;AF=0.0497;RAF=0.0039;LS=42607;MQS=28080;MQM=60;BQS=17135;BQM=38;EDS=12886;EDM=58;IDS=462047;IDM=989;CED=601;HMP=1;SB=0.9996;EFF=NON_SYNONYMOUS_CODING(MODERATE|MISSENSE|Cac/Aac|H164N|179|rpsG|protein_coding|CODING|NP_417800.1|1|1)	GT:DP:AD:AF:RAF:SB:SC:PF	0	0	0.0086	0	0	0	0.0043	0	0	0.0057	0	0.0048	0	0.0047	0	0.0059	0.0042	0	0	0
NC_000913.3	1775413	aroD	NP_416208.1	G	A	55.51	PASS	SN=0;STA=1775412;STO=1775413;TYP=SUB;R1P=57;R1M=71;R2P=64;R2M=59;AD=251;DP=9848;MCOV=-41;PPC=248;AF=0.0255;RAF=0.0037;LS=22835;MQS=15040;MQM=60;BQS=9270;BQM=38;EDS=6417;EDM=49;IDS=247656;IDM=989;CED=601;HMP=0;SB=0.9999;EFF=NON_SYNONYMOUS_CODING(MODERATE|MISSENSE|cGc/cAc|R243H|252|aroD|protein_coding|CODING|NP_416208.1|1|1)	GT:DP:AD:AF:RAF:SB:SC:PF	0	0	0	0	0	0	0	0	0	0.0057	0	0	0	0	0	0	0	1	0.0041	0
NC_000913.3	1866591	0	0	G	T	56.88	PASS	SN=0;STA=1866590;STO=1866591;TYP=SUB;R1P=198;R1M=168;R2P=197;R2M=148;AD=711;DP=12301;MCOV=-41;PPC=708;AF=0.0578;RAF=0.0028;LS=64697;MQS=42660;MQM=60;BQS=26040;BQM=39;EDS=20634;EDM=56;IDS=701958;IDM=992;CED=601;HMP=0;SB=0.9996;EFF=INTERGENIC(MODIFIER||||||||||1)	GT:DP:AD:AF:RAF:SB:SC:PF	0	0.0033	0	0.0063	0	0.0029	0	0	0	0.0057	1	0	0.0056	0.0034	0.9972	0	0.0032	0	0.0032	0
NC_000913.3	1626024	dcp	NP_416056.1	C	T	56.17	PASS	SN=0;STA=1626023;STO=1626024;TYP=SUB;R1P=27;R1M=50;R2P=29;R2M=37;AD=143;DP=11760;MCOV=-41;PPC=143;AF=0.0122;RAF=0.0000;LS=19963;MQS=8580;MQM=60;BQS=4985;BQM=39;EDS=5356;EDM=75;IDS=141559;IDM=992;CED=601;HMP=0;SB=0.9993;EFF=NON_SYNONYMOUS_CODING(MODERATE|MISSENSE|Gct/Act|A453T|681|dcp|protein_coding|CODING|NP_416056.1|1|1)	GT:DP:AD:AF:RAF:SB:SC:PF	0	0	0	0	0	0	0	0	0	0.0057	0	0	0	0	0	1	0	0.0041	0	0
NC_000913.3	3784378	grxC	NP_418067.1	A	T	58.16	PASS	SN=0;STA=3784377;STO=3784378;TYP=SUB;R1P=405;R1M=572;R2P=365;R2M=580;AD=1922;DP=9295;MCOV=-41;PPC=1909;AF=0.2068;RAF=0.0000;LS=182705;MQS=115320;MQM=60;BQS=71234;BQM=39;EDS=54239;EDM=75;IDS=1898805;IDM=992;CED=601;HMP=0;SB=0.9993;EFF=NON_SYNONYMOUS_CODING(MODERATE|MISSENSE|cTg/cAg|L22Q|83|grxC|protein_coding|CODING|NP_418067.1|1|1)	GT:DP:AD:AF:RAF:SB:SC:PF	0	0	0	0.0041	0	0	0	0	0	0.0057	0	0	0	0	0	1	1	0.9797	0.9953	0.9954
NC_000913.3	1034540	hyaB	NP_415492.1	G	A	55.57	PASS	SN=0;STA=1034539;STO=1034540;TYP=SUB;R1P=50;R1M=47;R2P=41;R2M=39;AD=177;DP=7226;MCOV=-41;PPC=170;AF=0.0245;RAF=0.0000;LS=16149;MQS=10620;MQM=60;BQS=6364;BQM=38;EDS=5129;EDM=52;IDS=174592;IDM=989;CED=601;HMP=1;SB=0.9999;EFF=SYNONYMOUS_CODING(LOW|SILENT|gaG/gaA|E429|597|hyaB|protein_coding|CODING|NP_415492.1|1|1)	GT:DP:AD:AF:RAF:SB:SC:PF	0	0	0	0	0	0	0	0	0	0.0057	0	0	0	0	0	0.0066	0	0	0	1
NC_000913.3	782987	nadA	NP_415271.1	C	T	55.95	PASS	SN=0;STA=782986;STO=782987;TYP=SUB;R1P=158;R1M=169;R2P=163;R2M=179;AD=669;DP=8759;MCOV=-41;PPC=657;AF=0.0764;RAF=0.0000;LS=60772;MQS=40140;MQM=60;BQS=24424;BQM=38;EDS=18637;EDM=50;IDS=660441;IDM=992;CED=601;HMP=0;SB=0.9998;EFF=SYNONYMOUS_CODING(LOW|SILENT|gcC/gcT|A301|347|nadA|protein_coding|CODING|NP_415271.1|1|1)	GT:DP:AD:AF:RAF:SB:SC:PF	0	0.0048	0	0	0	0	0	0	0	0.0057	0.9906	1	0	0	1	0	0	0	0	0
NC_000913.3	1212101	0	0	A	T	50	PASS	SN=0;STA=1212100;STO=1212101;TYP=SUB;R1P=305;R1M=294;R2P=292;R2M=278;AD=1169;DP=17587;MCOV=-41;PPC=1132;AF=0.0665;RAF=0.0000;LS=106084;MQS=70140;MQM=60;BQS=42895;BQM=38;EDS=31013;EDM=50;IDS=1154694;IDM=989;CED=601;HMP=2;SB=0.9999;EFF=INTERGENIC(MODIFIER||||||||||1)	GT:DP:AD:AF:RAF:SB:SC:PF	0	0	0	0.0017	0	0	0.0018	0	0.0019	0.0057	0.0016	0	0	0.002	0	0	0	0	0	0.0021
NC_000913.3	1619105	0	0	G	A	56.19	PASS	SN=0;STA=1619104;STO=1619105;TYP=SUB;R1P=73;R1M=72;R2P=67;R2M=82;AD=294;DP=14072;MCOV=-41;PPC=291;AF=0.0209;RAF=0.0000;LS=26751;MQS=17640;MQM=60;BQS=10689;BQM=38;EDS=8075;EDM=50;IDS=289949;IDM=989;CED=601;HMP=0;SB=0.9998;EFF=INTERGENIC(MODIFIER||||||||||1)	GT:DP:AD:AF:RAF:SB:SC:PF	0	0	0	0.0017	0	0	0.0036	0	0	0.0057	0	0	0	0.9965	0	0	0	0	0	0
NC_000913.3	2188706	yehB	NP_416612.1	G	A	56	PASS	SN=0;STA=2188705;STO=2188706;TYP=SUB;R1P=59;R1M=93;R2P=68;R2M=73;AD=293;DP=11081;MCOV=-41;PPC=291;AF=0.0264;RAF=0.0000;LS=26694;MQS=17580;MQM=60;BQS=10679;BQM=38;EDS=8007;EDM=68;IDS=289232;IDM=989;CED=601;HMP=0;SB=0.9995;EFF=SYNONYMOUS_CODING(LOW|SILENT|cgC/cgT|R735|826|yehB|protein_coding|CODING|NP_416612.1|1|1)	GT:DP:AD:AF:RAF:SB:SC:PF	0	0	0	0.0032	0	0	0.0031	0	0	0.0057	0	0	0	0	0	0	0.0039	0	0.0036	0.9965
NC_000913.3	2273540	yejA	NP_416682.4	T	A	55.76	PASS	SN=0;STA=2273539;STO=2273540;TYP=SUB;R1P=51;R1M=62;R2P=52;R2M=61;AD=226;DP=8907;MCOV=-41;PPC=222;AF=0.0254;RAF=0.0000;LS=20572;MQS=13560;MQM=60;BQS=8285;BQM=38;EDS=6233;EDM=49;IDS=223072;IDM=992;CED=601;HMP=1;SB=0.9997;EFF=NON_SYNONYMOUS_CODING(MODERATE|MISSENSE|Tcc/Acc|S393T|604|yejA|protein_coding|CODING|NP_416682.4|1|1)	GT:DP:AD:AF:RAF:SB:SC:PF	0	0	0	0	0	0	0.0043	0	0	0.0057	0	0	0	1	0	0	0	0.0048	0	0
NC_000913.3	2283037	yejK	NP_416691.1	C	T	55.77	PASS	SN=0;STA=2283036;STO=2283037;TYP=SUB;R1P=60;R1M=50;R2P=41;R2M=42;AD=193;DP=8392;MCOV=-41;PPC=187;AF=0.0230;RAF=0.0000;LS=17579;MQS=11580;MQM=60;BQS=7042;BQM=38;EDS=5395;EDM=51;IDS=190575;IDM=992;CED=601;HMP=0;SB=0.9998;EFF=NON_SYNONYMOUS_CODING(MODERATE|MISSENSE|cGc/cAc|R304H|335|yejK|protein_coding|CODING|NP_416691.1|1|1)	GT:DP:AD:AF:RAF:SB:SC:PF	0	0	0	0.0045	0	0	0	0	0	0.0057	0	0	0	0.0047	0	0	0.9947	0	0	0
NC_000913.3	3280150	kbaZ	NP_417601.1	C	A	55	PASS	SN=0;STA=3280149;STO=3280150;TYP=SUB;R1P=64;R1M=53;R2P=56;R2M=54;AD=227;DP=9187;MCOV=-41;PPC=223;AF=0.0247;RAF=0.0000;LS=20631;MQS=13620;MQM=60;BQS=8002;BQM=38;EDS=5905;EDM=72;IDS=223836;IDM=989;CED=601;HMP=1;SB=0.9998;EFF=NON_SYNONYMOUS_CODING(MODERATE|MISSENSE|Cag/Aag|Q413K|426|kbaZ|protein_coding|CODING|NP_417601.1|1|1|WARNING_TRANSCRIPT_NO_START_CODON)	GT:DP:AD:AF:RAF:SB:SC:PF	0	0.004	0.0043	0	0.0132	0.0046	0	0	0	0.0057	0.0045	0	0	0.0048	0	0	0	0.0046	1	0.0049
NC_000913.3	3794424	hldD	NP_418076.1	G	T	44.08	PASS	SN=0;STA=3794423;STO=3794424;TYP=SUB;R1P=71;R1M=73;R2P=55;R2M=69;AD=268;DP=9866;MCOV=-41;PPC=263;AF=0.0272;RAF=0.0000;LS=24381;MQS=16080;MQM=60;BQS=9828;BQM=38;EDS=7251;EDM=50;IDS=261979;IDM=989;CED=601;HMP=5;SB=0.9998;EFF=SYNONYMOUS_CODING(LOW|SILENT|ctG/ctT|L146|310|hldD|protein_coding|CODING|NP_418076.1|1|1)	GT:DP:AD:AF:RAF:SB:SC:PF	1	0.0037	0	0.0037	0	0.0076	0	0	0.0078	0.0057	0	0	0	0	0.0044	0	0	0	0	0
NC_000913.3	4458367	pmbA	NP_418656.1	G	C	49.43	PASS	SN=0;STA=4458366;STO=4458367;TYP=SUB;R1P=34;R1M=57;R2P=35;R2M=52;AD=178;DP=7952;MCOV=-41;PPC=176;AF=0.0224;RAF=0.0000;LS=16127;MQS=10680;MQM=60;BQS=6406;BQM=38;EDS=5033;EDM=49;IDS=175445;IDM=989;CED=601;HMP=2;SB=0.9993;EFF=NON_SYNONYMOUS_CODING(MODERATE|MISSENSE|Gcc/Ccc|A137P|450|pmbA|protein_coding|CODING|NP_418656.1|1|1)	GT:DP:AD:AF:RAF:SB:SC:PF	0	0	0	0	0	1	0.0054	0	0	0.0057	0	0	0	0.0052	0	0	0	0	0	0
NC_000913.3	1350122	0	0	C	G	57.25	PASS	SN=0;STA=1350121;STO=1350122;TYP=SUB;R1P=32;R1M=57;R2P=48;R2M=42;AD=179;DP=9133;MCOV=-41;PPC=178;AF=0.0196;RAF=0.0039;LS=24812;MQS=10740;MQM=60;BQS=6494;BQM=39;EDS=6917;EDM=75;IDS=175944;IDM=989;CED=601;HMP=1;SB=0.9996;EFF=INTERGENIC(MODIFIER||||||||||1)	GT:DP:AD:AF:RAF:SB:SC:PF	0	0	0	0	0	0	0	1	0	0.0056	0	0	0	0.0048	0	0	0	0	0	0.0047
NC_000913.3	889686	ybjL	NP_415368.1	A	G	57.3	PASS	SN=0;STA=889685;STO=889686;TYP=SUB;R1P=219;R1M=135;R2P=241;R2M=124;AD=719;DP=10445;MCOV=-41;PPC=713;AF=0.0688;RAF=0.0000;LS=72601;MQS=43140;MQM=60;BQS=26226;BQM=39;EDS=20801;EDM=74;IDS=710297;IDM=992;CED=601;HMP=1;SB=0.9991;EFF=NON_SYNONYMOUS_CODING(MODERATE|MISSENSE|gTc/gCc|V45A|561|ybjL|protein_coding|CODING|NP_415368.1|1|1|WARNING_TRANSCRIPT_NO_START_CODON)	GT:DP:AD:AF:RAF:SB:SC:PF	0	0	0	0	0	0.9967	0.9892	1	0	0.0056	0	0	0	0	0.0038	0	0	0	0	0
NC_000913.3	2087171	0	0	A	G	57.46	PASS	SN=0;STA=2087170;STO=2087171;TYP=SUB;R1P=31;R1M=42;R2P=38;R2M=39;AD=150;DP=9741;MCOV=-41;PPC=149;AF=0.0154;RAF=0.0000;LS=21100;MQS=9000;MQM=60;BQS=5440;BQM=38;EDS=5994;EDM=75;IDS=148681;IDM=992;CED=601;HMP=0;SB=0.9997;EFF=INTERGENIC(MODIFIER||||||||||1)	GT:DP:AD:AF:RAF:SB:SC:PF	0	0	0	0	0	0	0	1	0	0.0056	0	0	0	0	0	0	0	0	0.0043	0
NC_000913.3	2833818	norV	NP_417190.1	C	G	58.23	PASS	SN=0;STA=2833817;STO=2833818;TYP=SUB;R1P=154;R1M=147;R2P=136;R2M=125;AD=562;DP=7574;MCOV=-41;PPC=558;AF=0.0742;RAF=0.0000;LS=58970;MQS=33705;MQM=60;BQS=20896;BQM=39;EDS=17701;EDM=75;IDS=555052;IDM=992;CED=601;HMP=0;SB=0.9999;EFF=NON_SYNONYMOUS_CODING(MODERATE|MISSENSE|cCa/cGa|P448R|479|norV|protein_coding|CODING|NP_417190.1|1|1)	GT:DP:AD:AF:RAF:SB:SC:PF	0	0	0	0	0	0.995	0.995	1	0	0.0056	0	0	0	0.0055	0	0	0	0	0	0
NC_000913.3	1276858	narX	NP_415740.1	G	A	54.72	PASS	SN=0;STA=1276857;STO=1276858;TYP=SUB;R1P=34;R1M=50;R2P=45;R2M=39;AD=168;DP=7939;MCOV=-41;PPC=164;AF=0.0212;RAF=0.0000;LS=15353;MQS=10072;MQM=60;BQS=6010;BQM=38;EDS=4326;EDM=62;IDS=165530;IDM=992;CED=601;HMP=1;SB=0.9998;EFF=NON_SYNONYMOUS_CODING(MODERATE|MISSENSE|gCt/gTt|A254V|598|narX|protein_coding|CODING|NP_415740.1|1|1)	GT:DP:AD:AF:RAF:SB:SC:PF	0	0	1	0	0	0	0	0.0071	0	0.0056	0	0	0	0	0	0.0066	0	0	0	0
NC_000913.3	2019138	fliK	NP_416453.1	C	A	57.3	PASS	SN=0;STA=2019137;STO=2019138;TYP=SUB;R1P=261;R1M=195;R2P=266;R2M=214;AD=936;DP=8271;MCOV=-41;PPC=925;AF=0.1132;RAF=0.0000;LS=92033;MQS=56150;MQM=60;BQS=33551;BQM=39;EDS=26868;EDM=74;IDS=924328;IDM=992;CED=601;HMP=1;SB=0.9996;EFF=NON_SYNONYMOUS_CODING(MODERATE|MISSENSE|ttC/ttA|F251L|375|fliK|protein_coding|CODING|NP_416453.1|1|1)	GT:DP:AD:AF:RAF:SB:SC:PF	0.0053	0	0	0	0	0.0105	0	0.0063	0	0.0056	0	0	0.0058	0	0	1	0.9857	0.9954	1	1
NC_000913.3	1925403	0	0	A	T	55.86	PASS	SN=0;STA=1925402;STO=1925403;TYP=SUB;R1P=153;R1M=160;R2P=132;R2M=144;AD=589;DP=10688;MCOV=-41;PPC=581;AF=0.0551;RAF=0.0038;LS=53314;MQS=35338;MQM=60;BQS=21384;BQM=38;EDS=15552;EDM=62;IDS=581465;IDM=989;CED=601;HMP=0;SB=0.9999;EFF=INTERGENIC(MODIFIER||||||||||1)	GT:DP:AD:AF:RAF:SB:SC:PF	0	0	0	0	0.0036	1	0.9864	0	0.0035	0.0056	0	0	0	0.0037	0.0038	0	0	0	0	0.0039
NC_000913.3	1279285	narK	NP_415741.1	G	T	40.77	PASS	SN=0;STA=1279284;STO=1279285;TYP=SUB;R1P=96;R1M=61;R2P=91;R2M=47;AD=295;DP=10616;MCOV=-41;PPC=293;AF=0.0278;RAF=0.0035;LS=26869;MQS=17696;MQM=60;BQS=10610;BQM=38;EDS=7339;EDM=50;IDS=288391;IDM=989;CED=601;HMP=4;SB=0.9992;EFF=NON_SYNONYMOUS_CODING(MODERATE|MISSENSE|ttG/ttT|L443F|463|narK|protein_coding|CODING|NP_415741.1|1|1)	GT:DP:AD:AF:RAF:SB:SC:PF	0.0037	0	0.0033	0	0	0.0035	0.0034	0	0	0.0056	0	0.0072	1	0	0	0	0	0	0.004	0.0078
NC_000913.3	4459741	cybC	b4236	C	A	57.9	PASS	SN=0;STA=4459740;STO=4459741;TYP=SUB;R1P=434;R1M=548;R2P=479;R2M=556;AD=2017;DP=9572;MCOV=-41;PPC=2007;AF=0.2107;RAF=0.0000;LS=190915;MQS=121020;MQM=60;BQS=74461;BQM=39;EDS=58439;EDM=75;IDS=1992384;IDM=992;CED=601;HMP=0;SB=0.9997;EFF=SYNONYMOUS_CODING(LOW|SILENT|gtC/gtA|V84|121|cybC|protein_coding|CODING|b4236|1|1|WARNING_TRANSCRIPT_NO_START_CODON)	GT:DP:AD:AF:RAF:SB:SC:PF	0	0	0	0.0039	0	0	0.0042	0	0	0.0056	0	0	0	0	0.0042	1	1	1	0.9955	1
NC_000913.3	1968401	cheB	NP_416397.1	G	A	57.69	PASS	SN=0;STA=1968400;STO=1968401;TYP=SUB;R1P=401;R1M=453;R2P=409;R2M=417;AD=1680;DP=7859;MCOV=-41;PPC=1670;AF=0.2138;RAF=0.0000;LS=160677;MQS=100764;MQM=60;BQS=60622;BQM=38;EDS=47941;EDM=75;IDS=1659642;IDM=992;CED=601;HMP=0;SB=0.9999;EFF=NON_SYNONYMOUS_CODING(MODERATE|MISSENSE|aCc/aTc|T34I|349|cheB|protein_coding|CODING|NP_416397.1|1|1)	GT:DP:AD:AF:RAF:SB:SC:PF	0	0	0	0	0	0	0	0	0	0.0056	0	0.0053	0	0	0	0.9938	0.9838	1	1	1
NC_000913.3	3572610	glgB	NP_417890.1	C	A	49.58	PASS	SN=0;STA=3572609;STO=3572610;TYP=SUB;R1P=153;R1M=263;R2P=211;R2M=239;AD=866;DP=7246;MCOV=-41;PPC=852;AF=0.1195;RAF=0.0000;LS=86188;MQS=51960;MQM=60;BQS=30860;BQM=39;EDS=26128;EDM=74;IDS=854863;IDM=992;CED=601;HMP=2;SB=0.9995;EFF=NON_SYNONYMOUS_CODING(MODERATE|MISSENSE|tGg/tTg|W298L|728|glgB|protein_coding|CODING|NP_417890.1|1|1)	GT:DP:AD:AF:RAF:SB:SC:PF	0	0.0161	0	0	0	0.0049	0.0108	0	0	0.0056	0	0.0051	0.0058	0.0056	0	0.98	0.9941	1	1	1
NC_000913.3	4217476	aceA	NP_418439.1	G	A	55.37	PASS	SN=0;STA=4217475;STO=4217476;TYP=SUB;R1P=35;R1M=57;R2P=39;R2M=39;AD=170;DP=7462;MCOV=-41;PPC=168;AF=0.0228;RAF=0.0000;LS=15476;MQS=10200;MQM=60;BQS=6245;BQM=38;EDS=4631;EDM=50;IDS=167806;IDM=992;CED=601;HMP=0;SB=0.9995;EFF=NON_SYNONYMOUS_CODING(MODERATE|MISSENSE|cGg/cAg|R123Q|434|aceA|protein_coding|CODING|NP_418439.1|1|1)	GT:DP:AD:AF:RAF:SB:SC:PF	0	0	0	0	0.9941	0	0	0	0	0.0056	0	0	0	0	0	0.0067	0	0	0	0
NC_000913.3	1880502	leuE	NP_416312.1	AT	A	56.35	PASS	SN=0;STA=1880502;STO=1880503;TYP=DEL;R1P=67;R1M=59;R2P=65;R2M=71;AD=262;DP=10749;MCOV=-41;PPC=261;AF=0.0244;RAF=0.0000;LS=23806;MQS=15720;MQM=60;BQS=9549;BQM=38;EDS=7380;EDM=50;IDS=258396;IDM=989;CED=601;HMP=1;SB=1.0000;EFF=FRAME_SHIFT(HIGH||tat/|Y86|212|leuE|protein_coding|CODING|NP_416312.1|1|1|WARNING_TRANSCRIPT_NO_START_CODON);LOF=(leuE|b1798|1|1.00)	GT:DP:AD:AF:RAF:SB:SC:PF	0	0	0	0	0	0	0	0	0	0.0056	0	0	0	0	0	0	0.9962	0	0	0
NC_000913.3	1891870	yoaA	NP_416322.1	G	T	56.34	PASS	SN=0;STA=1891869;STO=1891870;TYP=SUB;R1P=55;R1M=53;R2P=49;R2M=52;AD=209;DP=7852;MCOV=-41;PPC=208;AF=0.0266;RAF=0.0000;LS=18939;MQS=12540;MQM=60;BQS=7516;BQM=38;EDS=6387;EDM=75;IDS=206136;IDM=989;CED=601;HMP=0;SB=1.0000;EFF=NON_SYNONYMOUS_CODING(MODERATE|MISSENSE|Ctg/Atg|L456M|636|yoaA|protein_coding|CODING|NP_416322.1|1|1|WARNING_TRANSCRIPT_NO_START_CODON)	GT:DP:AD:AF:RAF:SB:SC:PF	0	0.0061	0.0055	1	0	0	0	0	0	0.0056	0	0	0	0.0054	0	0	0	0	0.0058	0
NC_000913.3	2088979	yeeZ	NP_416520.1	A	G	55.56	PASS	SN=0;STA=2088978;STO=2088979;TYP=SUB;R1P=50;R1M=50;R2P=47;R2M=45;AD=192;DP=7971;MCOV=-41;PPC=192;AF=0.0241;RAF=0.0000;LS=17478;MQS=11520;MQM=60;BQS=6867;BQM=38;EDS=5225;EDM=73;IDS=189559;IDM=992;CED=601;HMP=1;SB=1.0000;EFF=SYNONYMOUS_CODING(LOW|SILENT|ctT/ctC|L50|274|yeeZ|protein_coding|CODING|NP_416520.1|1|1)	GT:DP:AD:AF:RAF:SB:SC:PF	0	0	0	0	0	0	0	0	0	0.0056	0.0056	0	0	0	0.0052	0	0	0	0	0
NC_000913.3	2267427	yeiQ	NP_416677.1	TG	T	47.15	PASS	SN=0;STA=2267427;STO=2267428;TYP=DEL;R1P=54;R1M=56;R2P=39;R2M=50;AD=199;DP=8059;MCOV=-41;PPC=195;AF=0.0247;RAF=0.0000;LS=18144;MQS=11940;MQM=60;BQS=7201;BQM=38;EDS=5157;EDM=50;IDS=196449;IDM=992;CED=601;HMP=3;SB=0.9998;EFF=FRAME_SHIFT(HIGH||tgg/|W395|488|yeiQ|protein_coding|CODING|NP_416677.1|1|1);LOF=(yeiQ|b2172|1|1.00)	GT:DP:AD:AF:RAF:SB:SC:PF	0	0.98	0.0055	0	0	0	0	0	0	0.0056	0	0	0	0	0	0	0	0	0	0
NC_000913.3	2684148	0	0	G	A	56.05	PASS	SN=0;STA=2684147;STO=2684148;TYP=SUB;R1P=55;R1M=76;R2P=52;R2M=72;AD=255;DP=10158;MCOV=-41;PPC=254;AF=0.0251;RAF=0.0000;LS=23154;MQS=15286;MQM=60;BQS=9332;BQM=38;EDS=7105;EDM=50;IDS=251530;IDM=989;CED=601;HMP=0;SB=0.9994;EFF=INTERGENIC(MODIFIER||||||||||1)	GT:DP:AD:AF:RAF:SB:SC:PF	0	0	0	0.004	0	0	0	0	0	0.0056	0.0036	0	0	0	0	0	0	1	0	0
NC_000913.3	3950242	0	0	C	T	56.62	PASS	SN=0;STA=3950241;STO=3950242;TYP=SUB;R1P=478;R1M=479;R2P=472;R2M=460;AD=1889;DP=13119;MCOV=-41;PPC=1878;AF=0.1440;RAF=0.0000;LS=171721;MQS=113335;MQM=60;BQS=68739;BQM=38;EDS=52794;EDM=50;IDS=1864886;IDM=992;CED=601;HMP=0;SB=1.0000;EFF=INTERGENIC(MODIFIER||||||||||1)	GT:DP:AD:AF:RAF:SB:SC:PF	1	1	0.9972	0.9946	0.9974	0.0054	0.0057	0	0.0026	0.0056	0.0025	0.0028	0	0	0	0	0	0	0	0
NC_000913.3	4020173	ubiJ	NP_418278.1	G	T	55.01	PASS	SN=0;STA=4020172;STO=4020173;TYP=SUB;R1P=39;R1M=53;R2P=34;R2M=40;AD=166;DP=7407;MCOV=-41;PPC=166;AF=0.0224;RAF=0.0000;LS=15080;MQS=9960;MQM=60;BQS=5959;BQM=38;EDS=4370;EDM=50;IDS=164000;IDM=992;CED=601;HMP=1;SB=0.9996;EFF=NON_SYNONYMOUS_CODING(MODERATE|MISSENSE|Gtc/Ttc|V184F|201|ubiJ|protein_coding|CODING|NP_418278.1|1|1)	GT:DP:AD:AF:RAF:SB:SC:PF	0	0	0	0	0	0	0.0057	0	0	0.0056	0	0	0	0	0	0	0	0	0	0
NC_000913.3	4296784	yjcO	NP_418502.1	A	T	43.75	PASS	SN=0;STA=4296783;STO=4296784;TYP=SUB;R1P=57;R1M=61;R2P=67;R2M=63;AD=248;DP=10694;MCOV=-41;PPC=247;AF=0.0232;RAF=0.0000;LS=22585;MQS=14880;MQM=60;BQS=8765;BQM=38;EDS=6196;EDM=50;IDS=244704;IDM=989;CED=601;HMP=5;SB=1.0000;EFF=NON_SYNONYMOUS_CODING(MODERATE|MISSENSE|aaT/aaA|N114K|229|yjcO|protein_coding|CODING|NP_418502.1|1|1)	GT:DP:AD:AF:RAF:SB:SC:PF	0	0	0	0	0.0038	0	0	0	0	0.0056	0	0.9959	0	0	0	0	0	0.0037	0	0
NC_000913.3	1419664	0	0	C	G	58.09	PASS	SN=0;STA=1419663;STO=1419664;TYP=SUB;R1P=46;R1M=40;R2P=38;R2M=46;AD=170;DP=10751;MCOV=-41;PPC=170;AF=0.0158;RAF=0.0037;LS=23622;MQS=10180;MQM=60;BQS=6257;BQM=39;EDS=6524;EDM=74;IDS=168187;IDM=992;CED=601;HMP=1;SB=1.0000;EFF=INTERGENIC(MODIFIER||||||||||1)	GT:DP:AD:AF:RAF:SB:SC:PF	0.0035	0	0	0	0.0041	0	0	1	0	0.0055	0	0	0	0	0	0.0065	0	0	0	0
NC_000913.3	2231157	yohK	NP_416647.1	C	T	57.67	PASS	SN=0;STA=2231156;STO=2231157;TYP=SUB;R1P=128;R1M=165;R2P=141;R2M=183;AD=617;DP=9030;MCOV=-41;PPC=611;AF=0.0683;RAF=0.0000;LS=63692;MQS=37020;MQM=60;BQS=22903;BQM=39;EDS=18006;EDM=75;IDS=609227;IDM=992;CED=601;HMP=1;SB=0.9995;EFF=SYNONYMOUS_CODING(LOW|SILENT|Ctg/Ttg|L47|231|yohK|protein_coding|CODING|NP_416647.1|1|1)	GT:DP:AD:AF:RAF:SB:SC:PF	0	0	0	0	0	1	0.9913	1	0	0.0055	0	0	0	0.005	0	0	0	0.0044	0	0
NC_000913.3	3147282	yghX	b4658	A	G	58.07	PASS	SN=0;STA=3147281;STO=3147282;TYP=SUB;R1P=47;R1M=52;R2P=41;R2M=39;AD=179;DP=10013;MCOV=-41;PPC=178;AF=0.0179;RAF=0.0000;LS=25139;MQS=10740;MQM=60;BQS=6579;BQM=39;EDS=7285;EDM=75;IDS=177351;IDM=992;CED=601;HMP=0;SB=0.9999;EFF=NON_SYNONYMOUS_CODING(MODERATE|MISSENSE|gTt/gCt|V137A|277|yghX|protein_coding|CODING|b4658|1|1|WARNING_TRANSCRIPT_INCOMPLETE)	GT:DP:AD:AF:RAF:SB:SC:PF	0	0	0	0	0	0	0	0	0	0.0055	0	0	0	0	0	1	0	0	0	0
NC_000913.3	3930831	ravA	NP_418202.4	A	C	55.84	PASS	SN=0;STA=3930830;STO=3930831;TYP=SUB;R1P=80;R1M=57;R2P=75;R2M=49;AD=261;DP=9676;MCOV=-41;PPC=256;AF=0.0270;RAF=0.0000;LS=23832;MQS=15660;MQM=60;BQS=9387;BQM=38;EDS=7108;EDM=54;IDS=257686;IDM=992;CED=601;HMP=0;SB=0.9994;EFF=NON_SYNONYMOUS_CODING(MODERATE|MISSENSE|aTt/aGt|I88S|498|ravA|protein_coding|CODING|NP_418202.4|1|1)	GT:DP:AD:AF:RAF:SB:SC:PF	0	0	0	0	0	0	0	0	0.0047	0.0055	0	0	0.0044	0	0	0.007	0	0.9882	0.0041	0
NC_000913.3	69625	araB	NP_414605.1	C	G	55.66	PASS	SN=0;STA=69624;STO=69625;TYP=SUB;R1P=56;R1M=51;R2P=62;R2M=53;AD=222;DP=8728;MCOV=-41;PPC=217;AF=0.0254;RAF=0.0000;LS=20110;MQS=13320;MQM=60;BQS=8104;BQM=38;EDS=5931;EDM=50;IDS=219195;IDM=989;CED=601;HMP=0;SB=0.9998;EFF=NON_SYNONYMOUS_CODING(MODERATE|MISSENSE|Gac/Cac|D142H|566|araB|protein_coding|CODING|NP_414605.1|1|1)	GT:DP:AD:AF:RAF:SB:SC:PF	0	0	0	0	0	0	0	0	0	0.0055	0	0	0	0.9822	0	0	0	0	0	0
NC_000913.3	838053	0	0	T	A	56.19	PASS	SN=0;STA=838052;STO=838053;TYP=SUB;R1P=56;R1M=61;R2P=51;R2M=64;AD=232;DP=10094;MCOV=-41;PPC=231;AF=0.0230;RAF=0.0000;LS=21134;MQS=13920;MQM=60;BQS=8444;BQM=38;EDS=6446;EDM=50;IDS=229222;IDM=989;CED=601;HMP=1;SB=0.9997;EFF=INTERGENIC(MODIFIER||||||||||1)	GT:DP:AD:AF:RAF:SB:SC:PF	0.0039	0	0	0	0	0	0	0	0	0.0055	0	0	0	0	0	0	0	0	0	0
NC_000913.3	1372531	ycjN	NP_415826.1	C	T	55.43	PASS	SN=0;STA=1372530;STO=1372531;TYP=SUB;R1P=44;R1M=57;R2P=58;R2M=46;AD=205;DP=9415;MCOV=-41;PPC=203;AF=0.0218;RAF=0.0000;LS=18698;MQS=12300;MQM=60;BQS=7402;BQM=38;EDS=5662;EDM=67;IDS=202319;IDM=992;CED=601;HMP=1;SB=1.0000;EFF=NON_SYNONYMOUS_CODING(MODERATE|MISSENSE|tCc/tTc|S208F|430|ycjN|protein_coding|CODING|NP_415826.1|1|1)	GT:DP:AD:AF:RAF:SB:SC:PF	0	0	1	0	0	0	0.0037	0	0.0047	0.0055	0	0	0.0047	0	0	0	0	0	0	0
NC_000913.3	1392984	0	0	G	A	56.75	PASS	SN=0;STA=1392983;STO=1392984;TYP=SUB;R1P=83;R1M=73;R2P=78;R2M=78;AD=312;DP=12132;MCOV=-41;PPC=312;AF=0.0257;RAF=0.0000;LS=28442;MQS=18720;MQM=60;BQS=11606;BQM=39;EDS=8606;EDM=65;IDS=308219;IDM=992;CED=601;HMP=1;SB=0.9999;EFF=INTERGENIC(MODIFIER||||||||||1)	GT:DP:AD:AF:RAF:SB:SC:PF	0	0	0.0027	0.0029	0	0	0	0	0.003	0.0055	0.0055	0	0	0	0	0	0	0	0	0
NC_000913.3	1445341	ydbH	NP_415899.1	G	T	54.72	PASS	SN=0;STA=1445340;STO=1445341;TYP=SUB;R1P=71;R1M=45;R2P=67;R2M=59;AD=242;DP=9686;MCOV=-41;PPC=241;AF=0.0250;RAF=0.0000;LS=22027;MQS=14519;MQM=60;BQS=8676;BQM=38;EDS=6782;EDM=50;IDS=236156;IDM=989;CED=601;HMP=0;SB=0.9995;EFF=NON_SYNONYMOUS_CODING(MODERATE|MISSENSE|gGg/gTg|G764V|879|ydbH|protein_coding|CODING|NP_415899.1|1|1)	GT:DP:AD:AF:RAF:SB:SC:PF	0	0	0	0	0	1	0	0	0	0.0055	0.0044	0	0	0	0	0	0.0039	0.0042	0	0
[truncated: 5,975 more rows]

## Sheet: INFO
##fileformat=VCFv4.2
[truncated: 55 more rows]

## Sheet: Mutations removed
Repetitive elements										CB100-9000	CB100-9001	CB100-9002	CB100-9003	CB100-9004	CB100-10000	CB100-10001	CB100-10002	CB100-10003	CB100-10004	CB100-11000	CB100-11001	CB100-11002	CB100-11003	CB100-11004	CB100-12000	CB100-12001	CB100-12002	CB100-12003	CB100-12004
[truncated: 368 more rows]
