# Supplementary material for: Physiology of Highly Radioresistant Escherichia coli After Experimental Evolution for 100 Cycles of Selection
Source: Front Microbiol. 2020 Sep 22;11:582590. doi: 10.3389/fmicb.2020.582590 (PMC7536353; doi:10.3389/fmicb.2020.582590)
Supplement: TABLE S2 — Duplicated and deleted genes and genetic elements in IR9-100 and IR10-100. [file Table_2.xlsx]

## Sheet: Sheet1
	Genes duplicated in IR9 (1,588,461† - 1,651,549†)	Genes deleted in IR9 (1,467,902† - 1,587,952†)	Genes deleted in IR10 (1,469,241† - 1,574,938†)
	ydeS*	insD1	insl2
	ydeT**	insC1	ydbA2
	yneL**	insl2	pdxI
	dif**	ydbA2	ydbD
	hipA**	pdxI	ynbA
	hipB	ydbD	ynbB
	yneO	ynbA	ynbC
	lsrK	ynbB	ynbD
	lsrR	ynbC	azoR
	lsrA	ynbD	hrpA
	lsrC	azoR	ydcF
	lsrD	hrpA	aldA
	lsrB	ydcF	gapC
	lsrF	aldA	cybB
	lsrG	gapC	rydC
	tam	cybB	ydcA
	yneE	rydC	hokB
	uxaB	ydcA	mokB
	dgcF	hokB	sokB
	yneE	mokB	trg
	glsB	sokB	ydcI
	sad	trg	ydcJ
	yneJ	ydcI	opgD
	yneK	ydcJ	ydcH
	ydeA	opgD	rimL
	marC	ydcH	ydcK
	marR	rimL	tehA
	marA	ydcK	tehB
	marB	tehA	ydcL
	eamA	tehB	yncK
	ydee	ydcL	insQ
	mgtS	yncK	ydcO
	mgtR	insQ	sutR
	dgcZ	ydcO	rihA
	ydeJ	sutR	REP117
	dcp	rihA	yncJ
	ydfG	REP117	hicA
	ydfH	yncJ	hicB
	ydfZ	hicA	ydcR
	ydfI	hicB	ydcS
	ydfJ	ydcR	ydcT
	ynfT	ydcS	ydcU
	ydfK	ydcT	ydcV
	pinQ	ydcU	patD
	tfaQ	ydcV	yncL
	ydfN	patD	ortT
	nohA	yncL	ydcY
	ynfO	ortT	ydcZ
	ydfO	ydcY	mnaT
	gnsB	ydcZ	curA
	ynfN	mnaT	mcbR
	ynfR	curA	yncD
	ynfQ	mcbR	yncE
	cspI	yncD	ansP
	rzpQ	yncE	yncG
	rrrQ	ansP	uncH
	ydfP	yncG	rhsE
	essQ	uncH	ydcD
	cspB	rhsE	yncO
	cspF	ydcD	yncI
	ynfS	yncO	ydcC
	ydfT	yncI	pptA
	ydfU	ydcC	yddH
	rem	pptA	nhoA
	hokD	yddH	REP118a
	relE	nhoA	yddE
	relB	REP118a	narV
	ydfV	yddE	narW
	flxA	narV	narY
	ydfW	narW	narZ
	ydfX	narY	REP119
	dicC	narZ	narU
	dicA	REP119	yddJ
	ydfA	narU	yddK
	ydfB	yddJ	yddL
	ydfC	yddK	yddG
	dicF	yddL	fdnG
	dicB	yddG	fdnH
	ydfE	fdnG	fdnI
	insD7	fdnH	C0362
		fdnI	yddM
		C0362	adhP
		yddM	maeA
		adhP	sra
		maeA	bdm
		sra	osmC
		bdm	ddpF
		osmC	ddpG
		ddpF	ddpC
		ddpG	ddpB
		ddpC	ddpA
		ddpB	ddpX
		ddpA	dosP
		ddpX	dosC
		dosP	yddW
		dosC	gadC
		yddW	gadB
		gadC	pqqL*
		gadB
		pqqL
		yddB
		yddA
		yneP
		ydeM
		ydeN
		ydeO
		safA
		ydeP
		ydeQ
		ydeR*
	Total: 80	Total: 110	Total: 98
	†: nucleotide position according to E. coli MG1655 genome U00096.3; *: interrupted gene; **: poor sequencing, duplicated copy is likely mutated
